# Supplementary material for: Long-read sequencing reveals novel structural variation markers for key agronomic and quality traits of food-grade soybean
Source: Front Plant Sci. 2025 Apr 8;16:1557748. doi: 10.3389/fpls.2025.1557748 (PMC12011826; doi:10.3389/fpls.2025.1557748)
Supplement: Supplementary file 2 [file Table1.xlsx]

## Sheet: Sheet1
Table S1 Structural variant distribution across 29 soybean genotypes, encompassing deletions (DEL), insertions (INS), inversions (INV), duplications (DUP), and inversion-duplications (INVDUP)
Name of Inbre lines	Number of reads	DEL	DUP	INS	INV	INVDUP	TOTAL SVs
V18-2523HO	81928654	14990	83	14940	106	26	30145
PI417206	17934667	447	11	159	5	0	622
V10-3653	19979522	2312	11	1457	35	11	3826
PI084639	94688332	20097	117	17328	253	68	37863
PI561286	22155916	2718	25	1638	169	28	4578
Zizuka	67016502	1242	6	1087	30	17	2382
MFS-561	38955816	9821	41	7895	96	19	17872
S15-15809C	92750463	16042	156	12841	297	41	29377
S16-15170C	23502953	1996	24	1074	23	7	3124
Hutcheson	78259691	16164	111	13027	109	23	29434
PI243551	80617888	19634	137	15312	114	23	35220
PI424364B	59376947	15368	89	12357	129	21	27964
VTsweet	7976911	16301	78	14896	75	20	31370
WM82	13797994	145	4	94	1	9	253
PI398256	22538264	4356	13	2905	24	10	7308
N16-1296	14506088	329	5	212	3	14	563
PI543794	14523618	338	5	199	6	15	563
PI594409A	24572533	3924	15	2910	14	6	6869
V18-0621HOA	28131755	2948	22	1805	23	23	4821
V18-2764HOLA	38643977	7438	45	5610	219	89	13401
V12-4590	16673829	484	5	263	27	14	793
PI408233B	12674589	10726	33	8071	34	3	18867
V16-0611	17439597	691	7	411	9	12	1130
V16-0565	36555949	11241	25	9252	35	2	20555
PI506730)	44468907	8735	48	6051	215	129	15178
PI423823	31404538	6716	42	4648	197	142	11745
S17-17168	33067291	5196	34	3062	128	13	8433
PI417491	12647632	99	5	75	167	30	376
V18-2132	85464612	475	4	374	11	1	865
Total	1132255435	200973	1201	159953	2554	816	365497
