# Supplementary material for: Long-read sequencing reveals novel structural variation markers for key agronomic and quality traits of food-grade soybean
Source: Front Plant Sci. 2025 Apr 8;16:1557748. doi: 10.3389/fpls.2025.1557748 (PMC12011826; doi:10.3389/fpls.2025.1557748)
Supplement: Supplementary file 3 [file Table2.xlsx]

## Sheet: SV_Length_distribution
Table S2 Structural variant length distributions across the 29 soybean genotypes
Name	50_100	101-200bp	201-500bp	501-1500bp	>1501	Name	total SV	50_100	101-200bp	201-500bp	501-1500bp	>1501
Hutchenson	4713	2811	2521	18419	970	Hutchenson	29434	0.160121	0.0955018	0.0856492	0.625773	0.0329551
MFS-561	3151	1964	1581	10878	298	MFS-561	17872	0.176309	0.109893	0.0884624	0.608662	0.0166741
N16-1296	124	59	22	350	8	N16-1296	563	0.220249	0.104796	0.0390764	0.62167	0.0142096
V16-0611	184	116	62	748	20	V16-0611	1130	0.162832	0.102655	0.0548673	0.661947	0.0176991
S17-17168	1918	836	259	5387	33	S17-17168	8433	0.22744	0.0991344	0.0307127	0.6388	0.0039132
V18-2132	143	94	77	537	14	V18-2132	865	0.165318	0.108671	0.0890173	0.620809	0.016185
PI408233B	3686	1966	1375	11637	203	PI408233B	18867	0.195368	0.104203	0.0728786	0.616791	0.0107595
PI423823	2529	1287	788	7084	57	PI423823	11745	0.215326	0.109579	0.0670924	0.60315	0.00485313
PI417491	80	64	82	142	8	PI417491	376	0.212766	0.170213	0.218085	0.37766	0.0212766
V16-0565	3541	2021	1754	12632	607	V16-0565	20555	0.17227	0.0983216	0.085332	0.614546	0.0295305
PI506730	2700	1718	1329	9323	108	PI506730	15178	0.177889	0.11319	0.0875609	0.614244	0.00711556
PI084639	6079	3577	3106	22915	2186	PI084639	37863	0.160553	0.0944722	0.0820326	0.605208	0.0577345
PI243551	5890	3350	2876	22088	1016	PI243551	35220	0.167235	0.0951164	0.0816581	0.627144	0.0288472
PI398256	1437	693	471	4663	56	PI398256	7320	0.196311	0.0946721	0.0643443	0.637022	0.00765027
PI417206	99	26	16	467	14	PI417206	622	0.159164	0.0418006	0.0257235	0.750804	0.022508
PI424364B	4771	2728	2338	17347	780	PI424364B	27964	0.170612	0.097554	0.0836075	0.620333	0.027893
PI543794	112	46	27	370	8	PI543794	563	0.198934	0.0817052	0.0479574	0.657194	0.0142096
PI561286	1105	395	196	2859	23	PI561286	4578	0.241372	0.0862822	0.0428135	0.624509	0.00502403
PI594409A	1268	755	530	4234	82	PI594409A	6869	0.184597	0.109914	0.0771582	0.616392	0.0119377
S15-15809C	5134	3007	2564	18045	627	S15-15809C	29377	0.174763	0.102359	0.0872792	0.614256	0.0213432
S16-15170C	661	262	98	2085	18	S16-15170C	3124	0.211588	0.0838668	0.03137	0.667414	0.00576184
V10-3653	839	326	207	2432	22	V10-3653	3826	0.219289	0.0852065	0.0541035	0.635651	0.00575013
V12-4590	127	80	54	520	12	V12-4590	793	0.160151	0.100883	0.0680958	0.655738	0.0151324
V18-0621HOA	989	479	237	3089	27	V18-0621HOA	4821	0.205144	0.099357	0.0491599	0.640738	0.0056005
V18-2523HO	4668	2770	2599	17423	2685	V18-2523HO	30145	0.154852	0.0918892	0.0862166	0.577973	0.0890695
V18-2764HOLA	2550	1499	1177	8052	117	V18-2764HOLA	13395	0.19037	0.111907	0.0878686	0.60112	0.0087346
VTsweet	5551	3019	2537	18605	1658	VTsweet	31370	0.176953	0.0962384	0.0808734	0.593083	0.052853
Zizuka	395	238	228	1443	78	Zizuka	2382	0.165827	0.099916	0.0957179	0.605793	0.0327456
WM82	43	23	17	162	8	WM82	253	0.16996	0.0909091	0.0671937	0.640316	0.0316206
							Average	0.185985	0.0993174	0.0735141	0.619819
										Sum of average	0.978635
											0.358816
