# Supplementary material for: Long-read sequencing reveals novel structural variation markers for key agronomic and quality traits of food-grade soybean
Source: Front Plant Sci. 2025 Apr 8;16:1557748. doi: 10.3389/fpls.2025.1557748 (PMC12011826; doi:10.3389/fpls.2025.1557748)
Supplement: Supplementary file 4 [file Table3.xlsx]

## Sheet: Sheet1
Table S3 Structural variant distributions across different genomic regions across the 29 soybean genotypes
Name	Promoter_1kb	Promoter_1_2kb	Promoter_2_3kb	Downstream_<300bp	Intergenic_3_15kb
Hutchenson	2494	1457	1173	251	22478
MFS_561	1807	1109	878	180	13272
N16_1296	110	67	35	14	326
PI084639	3610	2119	1646	340	28179
PI243551	3382	2041	1541	331	25993
PI398256	911	551	407	101	4866
PI408233B	2181	1368	1042	228	13340
PI417206	47	9	12	4	282
PI417491	115	12	15	5	218
PI423823	1680	983	765	165	8081
PI424364B	2800	1718	1278	280	20457
PI506730	1754	1058	769	171	11050
PI543794	102	43	38	8	356
PI561286	580	411	386	61	3077
PI594409A	847	499	422	99	4765
S15_15809C	2457	1475	1168	222	21228
S16_15170C	2457	1475	1168	222	21228
S17_17168	1163	705	516	120	5690
V10_3653	550	342	282	48	2514
V12_4590	99	34	29	13	475
V16_0565	2103	1299	1029	221	15131
V16_0611	200	99	64	16	655
V18_0621HOA	731	395	257	85	3219
V18_2132	46	24	17	4	773
V18_2523HO	2338	1356	1047	235	22806
V18_2764HOLA	1501	884	721	167	9766
VTsweet	2847	1801	1394	298	23460
WM82	38	12	6	5	138
Zizuka	213	123	96	13	1937
