# Supplementary material for: Long-read sequencing reveals novel structural variation markers for key agronomic and quality traits of food-grade soybean
Source: Front Plant Sci. 2025 Apr 8;16:1557748. doi: 10.3389/fpls.2025.1557748 (PMC12011826; doi:10.3389/fpls.2025.1557748)
Supplement: Supplementary file 5 [file Table4.xlsx]

## Sheet: Protein_Content
Table S4 Statistical analysis of SV(s)-carrying genes associating with protein content, oleic acid content, methionine content, seed weight, plant height, and flower color using Benjamini-Hochberg test
geneId	VTSweet_LG	PI417206_LG	V10_3653_LG	PI417491_LG	MFS_561_SS	V18_2132_SS	Zizuka_SS	S16_15170C_Y	Hutcheson_Y	S15_15809C_Y	V12_4590_HP	S17_17168_HP	V18_2523HO_HP	V18_0621HOA_FA_O	V18_2764HOLA_FA_O	N16_1296_HOLN	PI084639_Met	PI561286_Met	PI543794_Met	PI594409A_Met	V16_0611_HH	V16_0565_HH	PI506730_HH	PI423823_HH	PI243551_LL	PI424364B_LL	PI408233B_LL	PI398256_LL	WM82.df	High_Protein	Normal_Protein	p_val	Bonferroni	hochberg	BH
Glyma.05G086400	222	24	0	0	54	0	0	492	225	492	12	12	381	30	33	0	330	0	0	21	3	84	27	0	303	201	84	36	3	405	2664	0	0	0	0
Glyma.20G056500	330	24	6	0	93	0	0	480	294	480	18	30	573	27	54	0	522	9	0	63	9	126	72	0	345	246	81	63	0	621	3324	0	0	0	0
Glyma.05G091000	106	16	2	0	12	0	0	226	124	226	0	6	118	2	8	0	98	0	0	0	0	24	6	0	128	78	20	8	2	124	1086	2.39288e-168	6.26935e-164	6.26887e-164	2.08978e-164
Glyma.04G143000	90	9	0	0	27	0	0	81	126	81	0	18	108	27	54	0	135	18	0	18	0	54	72	45	99	54	27	9	9	126	1035	8.55062e-157	2.24026e-152	2.24001e-152	5.60066e-153
Glyma.13G005300	110	0	0	0	10	0	0	30	110	30	0	30	30	10	20	0	110	0	0	0	0	100	50	20	100	110	40	10	0	60	860	2.63737e-153	6.90992e-149	6.90886e-149	1.38198e-149
Glyma.15G219800	120	2	2	0	40	0	0	156	128	156	0	4	184	0	8	0	170	0	0	6	0	42	26	0	120	106	42	24	0	188	1148	4.89054e-152	1.28132e-147	1.28108e-147	2.13554e-148
Glyma.07G065600	99	0	27	0	9	0	0	189	126	189	9	18	126	18	45	0	72	0	0	36	0	54	27	54	63	27	0	0	0	153	1035	2.00105e-144	5.24275e-140	5.24154e-140	7.48964e-141
Glyma.03G069800	104	0	0	0	64	0	0	104	104	104	0	8	112	4	28	0	96	0	0	12	0	56	44	4	100	92	24	20	0	120	960	4.20901e-144	1.10276e-139	1.10247e-139	1.37845e-140
Glyma.19G066800	110	0	0	0	55	0	0	88	99	88	0	11	121	0	33	0	99	0	0	11	0	33	99	22	99	99	44	0	0	132	979	1.89311e-142	4.95994e-138	4.95843e-138	5.51105e-139
Glyma.06G225800	92	4	3	0	17	0	0	158	61	158	1	3	134	4	11	0	159	3	0	5	3	37	4	0	110	91	24	14	0	138	958	1.93509e-135	5.06994e-131	5.0682e-131	5.06994e-132
Glyma.02G161600	112	4	4	2	42	0	30	118	72	118	6	6	126	4	12	0	112	0	0	6	2	36	20	2	140	62	30	12	0	138	940	8.89953e-132	2.33168e-127	2.33079e-127	2.11971e-128
Glyma.15G247400	84	0	0	0	60	0	0	84	96	84	0	12	72	0	48	0	84	24	0	0	0	0	12	36	96	84	12	0	0	84	804	5.63683e-129	1.47685e-124	1.47623e-124	1.23071e-125
Glyma.18G226850	96	12	12	0	0	0	0	72	0	72	0	0	120	0	0	0	144	36	0	0	12	0	36	84	60	144	24	60	0	120	864	2.35955e-124	6.18201e-120	6.17918e-120	4.75539e-121
Glyma.01G074600	73	1	1	0	26	57	18	103	53	103	7	1	109	2	11	0	116	0	0	8	1	27	26	0	94	50	14	13	0	117	797	4.92609e-112	1.29064e-107	1.29e-107	9.21883e-109
Glyma.11G178800	78	13	7	0	26	0	0	92	65	92	1	8	102	9	14	0	99	0	0	8	11	31	8	0	92	50	28	18	5	111	746	2.48493e-104	6.51052e-100	6.50705e-100	4.29445e-101
Glyma.14G115700	36	0	9	0	9	0	0	90	45	90	0	0	18	0	9	0	72	0	0	9	0	0	18	0	54	54	9	18	0	18	522	2.62256e-104	6.87111e-100	6.86718e-100	4.29445e-101
Glyma.07G164400	60	4	0	0	31	0	0	121	61	121	3	3	98	0	9	0	82	1	0	8	2	29	1	0	95	60	19	15	0	104	719	5.96706e-102	1.56337e-97	1.56241e-97	9.19629e-99
Glyma.10G097100	78	3	9	1	9	0	0	46	42	46	10	6	32	1	8	0	61	5	4	15	4	40	25	20	74	38	22	22	0	48	573	1.57978e-98	4.13902e-94	4.13633e-94	2.29946e-95
Glyma.20G057500	72	9	1	0	19	0	0	131	68	131	1	7	106	1	7	0	76	1	0	3	1	22	9	0	77	60	21	12	0	114	721	5.76807e-98	1.51123e-93	1.5102e-93	7.95386e-95
Glyma.16G017400	38	0	19	0	38	0	0	38	38	38	0	38	19	0	19	0	57	19	0	38	0	38	38	0	38	57	57	19	0	57	589	2.78049e-97	7.28487e-93	7.27959e-93	3.64244e-94
Glyma.13G027200	56	5	0	0	35	0	0	84	59	84	11	0	91	6	18	0	100	0	0	1	1	28	28	0	63	63	36	20	1	102	688	1.55822e-96	4.08254e-92	4.07943e-92	1.94407e-93
Glyma.18G155000	68	2	0	0	20	0	0	78	64	78	0	6	58	0	14	0	76	0	0	0	0	12	26	2	70	56	24	4	0	64	594	7.68554e-95	2.01361e-90	2.012e-90	9.15278e-92
Glyma.15G240000	70	0	10	0	30	0	0	60	35	60	10	10	70	5	45	0	25	10	0	20	10	25	30	15	75	60	40	20	5	90	650	3.66328e-94	9.59778e-90	9.58972e-90	4.17295e-91
Glyma.03G019300	42	0	21	0	21	0	0	42	42	42	0	21	42	21	21	0	42	21	0	21	21	42	21	21	42	42	42	21	0	63	588	4.46901e-94	1.17088e-89	1.16985e-89	4.87867e-91
Glyma.10G102700	76	2	0	0	18	0	0	82	56	82	0	2	58	2	4	0	82	0	0	6	0	20	14	0	72	44	8	2	0	60	570	8.75397e-92	2.29354e-87	2.29144e-87	9.17416e-89
Glyma.15G220000	47	2	0	0	30	0	0	117	78	117	5	8	129	4	19	0	102	0	0	14	2	2	9	1	76	71	30	17	1	142	739	5.62807e-90	1.47455e-85	1.47315e-85	5.67136e-87
Glyma.15G248200	38	0	0	0	38	0	0	38	38	38	0	19	38	19	38	0	19	0	19	19	0	38	38	19	38	38	38	38	0	57	551	2.76449e-89	7.24297e-85	7.23579e-85	2.68258e-86
Glyma.01G098000	45	0	10	0	30	30	45	15	45	15	0	5	15	0	20	0	45	0	0	0	0	10	25	10	40	40	20	10	0	20	455	1.2477e-88	3.26898e-84	3.26548e-84	1.12723e-85
Glyma.07G130400	75	0	30	0	45	0	0	30	30	30	0	30	30	0	30	0	30	30	0	0	0	60	30	30	30	30	30	15	0	60	555	1.21913e-88	3.19412e-84	3.19083e-84	1.12723e-85
Glyma.15G239700	67	2	9	4	28	0	0	26	25	26	13	7	49	11	20	1	76	18	2	22	8	58	23	4	32	42	25	24	6	69	559	3.87981e-85	1.01651e-80	1.01539e-80	3.38837e-82
Glyma.10G083600	40	0	10	0	40	0	0	40	0	40	0	20	0	0	0	0	40	10	0	0	0	40	40	30	40	20	20	20	0	20	430	3.14811e-83	8.24804e-79	8.23859e-79	2.66066e-80
Glyma.10G102200	120	0	0	0	20	0	0	25	85	25	0	0	65	0	5	0	55	0	0	0	0	25	25	0	120	15	5	15	0	65	540	4.29935e-83	1.12643e-78	1.1251e-78	3.5201e-80
Glyma.13G027600	55	1	0	0	18	0	0	68	63	68	2	2	64	4	7	0	74	0	0	2	0	30	11	1	61	52	22	1	0	68	538	2.91788e-81	7.64485e-77	7.63551e-77	2.31662e-78
Glyma.10G095500	46	0	4	0	28	0	0	56	54	56	4	10	58	12	20	0	66	6	0	8	6	22	16	10	50	46	24	10	0	72	540	8.1414e-80	2.13305e-75	2.13036e-75	6.27367e-77
Glyma.16G106800	68	0	0	0	68	0	0	17	51	17	0	0	68	17	51	0	34	0	0	0	0	34	17	17	68	34	0	34	0	68	527	5.46301e-79	1.43131e-74	1.42945e-74	4.08945e-76
Glyma.09G116000	56	0	0	0	18	0	0	98	52	98	2	2	66	0	6	0	74	0	0	0	0	6	18	0	66	28	10	0	0	70	530	1.11286e-78	2.9157e-74	2.9118e-74	8.09916e-76
Glyma.10G100800	47	3	10	0	15	0	0	33	43	33	4	6	21	3	11	2	42	8	3	14	6	24	16	11	48	28	21	10	2	31	433	1.00166e-77	2.62435e-73	2.62074e-73	7.09284e-75
Glyma.12G158460	52	0	0	0	24	0	0	92	52	92	0	0	92	0	8	0	68	0	0	0	0	32	24	0	52	48	28	0	0	92	572	1.91895e-77	5.02765e-73	5.02055e-73	1.32307e-74
Glyma.12G152300	74	6	0	0	16	0	0	116	38	116	0	6	102	2	4	0	88	0	0	0	2	24	4	0	48	50	10	6	0	108	604	3.99006e-77	1.0454e-72	1.04388e-72	2.6805e-74
Glyma.02G164700	70	0	0	0	14	0	7	77	63	77	0	0	84	7	0	0	42	0	0	0	0	7	42	0	77	49	7	7	0	84	546	1.16469e-75	3.05149e-71	3.04695e-71	7.62872e-73
Glyma.16G031600	30	0	20	0	30	0	0	0	30	0	0	0	0	0	0	0	70	0	0	0	0	30	10	10	50	30	0	20	0	0	330	9.61142e-74	2.51819e-69	2.51435e-69	6.14193e-71
Glyma.13G321300	32	0	32	0	0	0	0	32	32	32	0	0	32	0	32	0	32	16	0	32	0	32	16	32	32	32	0	0	0	32	416	1.47732e-73	3.87058e-69	3.86453e-69	9.21567e-71
Glyma.03G080600	78	0	0	0	36	0	0	66	48	66	0	6	144	6	12	0	90	0	0	0	0	6	24	0	150	60	12	12	0	150	666	6.1652e-73	1.61528e-68	1.61269e-68	3.75647e-70
Glyma.06G226000	47	0	0	0	26	0	0	92	52	92	0	9	60	0	2	0	59	1	0	1	0	11	4	1	68	20	9	4	0	69	489	1.00948e-70	2.64484e-66	2.6405e-66	6.01099e-68
Glyma.09G116100	56	8	0	0	14	0	0	66	52	66	0	0	68	0	8	0	74	0	0	0	0	18	24	0	58	38	0	0	0	68	482	9.64586e-70	2.52722e-65	2.52297e-65	5.61604e-67
Glyma.04G093800	44	0	0	0	0	0	0	22	44	22	0	0	0	0	11	0	44	0	0	0	0	22	11	0	44	22	22	0	0	0	308	5.95547e-69	1.56033e-64	1.55765e-64	3.39203e-66
Glyma.07G127100	49	0	0	7	14	0	0	42	42	42	7	14	28	7	28	0	42	7	0	0	0	28	7	14	35	35	28	7	0	49	434	1.04237e-68	2.73101e-64	2.72622e-64	5.81067e-66
Glyma.02G186100	18	0	0	0	24	0	18	42	36	42	0	0	0	0	0	0	0	0	0	0	0	30	0	12	18	30	24	0	0	0	294	6.68363e-66	1.75111e-61	1.74797e-61	3.64815e-63
Glyma.01G119500	15	0	0	0	15	15	15	30	25	30	0	0	5	10	15	5	20	5	0	10	0	10	15	15	15	15	10	15	0	5	305	4.22931e-65	1.10808e-60	1.10605e-60	2.26138e-62
Glyma.19G065600	64	0	4	0	0	0	0	16	56	16	0	12	72	0	20	0	60	0	0	16	0	40	36	4	56	56	36	12	0	84	492	8.21199e-65	2.15154e-60	2.14752e-60	4.30308e-62
Glyma.07G165200	56	2	0	2	26	0	0	62	44	62	0	0	70	0	8	0	72	0	0	0	0	4	8	0	56	48	6	6	0	70	462	8.889e-65	2.32892e-60	2.32447e-60	4.5665e-62
Glyma.17G191000	33	0	0	0	12	0	0	63	30	63	0	3	21	0	0	0	78	0	0	3	0	6	6	0	33	18	3	3	0	24	351	5.68415e-64	1.48925e-59	1.48635e-59	2.86393e-61
Glyma.06G260900	48	0	8	0	0	0	0	64	16	64	0	16	80	24	24	0	80	0	0	0	0	40	32	24	56	16	0	16	0	96	512	7.35062e-64	1.92586e-59	1.92204e-59	3.6337e-61
Glyma.01G095100	38	0	0	0	14	28	10	52	32	52	0	0	50	0	2	0	52	0	0	2	0	18	10	2	50	38	10	0	0	50	410	3.13772e-63	8.22082e-59	8.20419e-59	1.52237e-60
Glyma.08G266300	36	0	6	0	24	0	0	36	36	36	0	18	42	6	48	0	54	0	6	12	0	18	18	18	30	30	18	0	0	60	432	3.97389e-63	1.04116e-58	1.03901e-58	1.89301e-60
Glyma.19G070700	50	4	2	3	14	0	0	55	42	55	3	3	68	3	11	3	58	3	2	3	2	15	10	7	55	39	17	6	2	74	461	7.73078e-63	2.02546e-58	2.02121e-58	3.6169e-60
Glyma.15G216300	0	0	0	0	40	0	0	16	48	16	0	16	56	24	24	0	56	0	0	32	0	48	8	16	32	48	32	16	0	72	456	1.08164e-62	2.83389e-58	2.82784e-58	4.97174e-60
Glyma.11G197900	32	0	16	0	32	0	0	32	32	32	0	16	32	0	32	0	32	0	0	16	0	0	16	32	32	32	32	0	0	48	400	4.19525e-62	1.09915e-57	1.09676e-57	1.89509e-59
Glyma.04G141400	0	0	0	0	0	0	0	0	60	0	0	0	0	12	36	0	60	0	0	0	24	0	12	12	60	0	0	0	0	0	276	5.5884e-62	1.46416e-57	1.46092e-57	2.48163e-59
Glyma.18G155100	42	0	0	0	28	0	0	16	48	16	0	4	54	2	18	0	56	0	0	4	0	34	26	2	48	44	26	8	0	58	418	3.63428e-61	9.52181e-57	9.50037e-57	1.58697e-58
Glyma.15G205500	26	0	0	0	52	0	0	52	65	52	0	13	104	13	13	0	91	0	0	13	0	78	0	13	26	39	0	0	0	117	533	7.48869e-60	1.96204e-55	1.95754e-55	3.21645e-57
Glyma.19G169200	38	0	0	0	38	0	0	38	38	38	0	38	0	19	0	0	76	0	0	0	0	0	0	38	38	0	0	0	0	38	361	8.17985e-59	2.14312e-54	2.13813e-54	3.45665e-56
Glyma.07G168100	56	0	4	0	28	0	0	68	20	68	0	4	80	0	24	0	36	0	0	0	0	24	12	8	72	24	16	0	0	84	460	1.82037e-58	4.76938e-54	4.75809e-54	7.57044e-56
Glyma.06G164900	34	0	0	0	17	0	0	34	17	34	0	0	17	0	17	0	34	0	0	0	0	17	0	51	17	17	17	0	0	17	306	3.50167e-58	9.17437e-54	9.15231e-54	1.4335e-55
Glyma.03G048500	48	0	0	0	36	0	0	36	48	36	0	12	60	24	12	0	36	0	0	0	0	24	24	0	36	60	12	0	0	72	432	7.19976e-58	1.88634e-53	1.88173e-53	2.90206e-55
Glyma.14G159700	60	6	0	0	9	0	0	84	63	84	0	9	75	0	3	0	36	0	0	0	0	15	3	3	39	36	9	6	0	84	456	1.11768e-57	2.92831e-53	2.92105e-53	4.43683e-55
Glyma.06G294200	16	0	0	0	0	0	0	0	24	0	0	0	0	0	24	0	32	8	0	8	0	24	24	24	56	8	8	0	0	0	256	1.27775e-57	3.34771e-53	3.33927e-53	4.99658e-55
Glyma.04G146600	33	0	2	0	9	0	0	52	37	52	0	3	35	2	5	0	43	2	0	1	0	14	14	4	50	21	12	2	0	38	355	1.48749e-57	3.89722e-53	3.88725e-53	5.7312e-55
Glyma.20G073500	35	0	0	0	25	0	0	40	35	40	0	0	30	0	5	0	25	0	0	5	0	30	15	10	30	30	10	0	0	30	335	2.26099e-57	5.9238e-53	5.9082e-53	8.46257e-55
Glyma.15G214400	0	0	0	0	44	0	0	11	66	11	0	0	77	0	22	0	55	0	0	0	0	55	0	0	33	99	44	0	0	77	440	2.25043e-57	5.89613e-53	5.88082e-53	8.46257e-55
Glyma.03G124700	20	0	20	0	20	0	0	20	24	20	0	12	0	8	0	0	28	12	0	8	0	16	20	16	20	16	12	4	0	12	284	2.66823e-56	6.99077e-52	6.9721e-52	9.84616e-54
Glyma.13G206900	39	0	0	0	0	0	0	26	39	26	0	0	39	13	0	0	39	0	0	26	0	0	26	13	39	26	26	13	0	39	351	3.17427e-56	8.31658e-52	8.29404e-52	1.15508e-53
Glyma.07G164750	34	2	0	0	9	0	0	74	33	74	1	0	59	3	7	0	44	0	0	0	0	11	1	0	50	39	9	8	0	60	398	3.43793e-56	9.00737e-52	8.98262e-52	1.23389e-53
Glyma.01G118900	27	0	0	0	18	18	27	6	3	6	0	0	3	0	9	0	24	0	0	3	0	21	9	12	27	18	21	9	0	3	258	4.00295e-56	1.04877e-51	1.04585e-51	1.41726e-53
Glyma.19G065400	48	0	0	0	4	0	0	12	40	12	0	4	48	0	24	0	44	4	0	8	0	36	32	4	44	36	28	4	0	52	380	4.21091e-56	1.10326e-51	1.10014e-51	1.47101e-53
Glyma.01G095298	36	0	0	0	24	21	33	18	30	18	0	6	42	0	15	0	36	0	3	0	0	18	24	6	30	30	21	6	0	48	369	1.11307e-55	2.91625e-51	2.9079e-51	3.83717e-53
Glyma.03G175600	28	0	7	0	28	0	0	28	28	28	0	0	28	28	0	0	7	0	0	28	0	28	28	0	28	0	0	28	0	28	322	1.19455e-55	3.12971e-51	3.12051e-51	4.01245e-53
Glyma.05G087400	28	0	0	0	14	0	0	42	28	42	0	0	28	0	14	0	28	0	0	0	0	14	28	0	56	28	0	0	0	28	322	1.19455e-55	3.12971e-51	3.12051e-51	4.01245e-53
Glyma.18G141200	32	0	0	0	32	0	0	24	40	24	0	4	44	4	20	0	24	0	0	0	0	24	28	8	40	36	24	8	0	48	368	1.79045e-55	4.69097e-51	4.67701e-51	5.93794e-53
Glyma.18G195200	76	0	24	0	36	0	0	32	28	32	0	12	64	16	16	0	36	0	0	0	4	28	48	0	40	0	0	12	0	76	428	2.09464e-55	5.48797e-51	5.47142e-51	6.85996e-53
Glyma.16G174700	16	0	0	0	32	0	0	12	4	12	0	16	40	12	24	4	96	20	0	12	0	40	0	12	16	40	12	20	0	56	384	4.08846e-55	1.07118e-50	1.06787e-50	1.30631e-52
Glyma.18G142900	24	0	0	0	32	0	0	32	40	32	0	16	40	8	24	8	16	0	0	0	0	32	16	16	40	32	32	0	0	56	384	4.08846e-55	1.07118e-50	1.06787e-50	1.30631e-52
Glyma.02G039900	16	0	0	0	16	0	32	16	16	16	0	0	16	0	16	0	16	16	0	16	0	16	16	16	16	16	16	16	0	16	288	7.2487e-55	1.89916e-50	1.89322e-50	2.28814e-52
Glyma.04G074300	12	0	12	0	12	0	0	24	12	24	0	0	12	0	24	0	12	0	0	0	0	24	24	12	24	24	24	12	0	12	276	1.44087e-54	3.77507e-50	3.76311e-50	4.49413e-52
Glyma.13G027850	36	0	0	0	12	0	0	16	28	16	0	4	16	0	0	0	36	0	0	4	0	32	28	4	32	32	20	0	0	20	296	2.30602e-54	6.04177e-50	6.0224e-50	7.10796e-52
Glyma.04G111400	8	0	0	0	8	0	0	8	64	8	0	0	8	0	32	0	56	0	0	0	0	8	16	0	8	48	0	0	0	8	264	2.45182e-54	6.42377e-50	6.40293e-50	7.4695e-52
Glyma.17G193700	36	0	0	0	14	0	0	38	18	38	0	2	22	0	10	0	28	0	0	0	0	20	12	2	40	34	14	0	0	24	304	6.4185e-54	1.68165e-49	1.67613e-49	1.93293e-51
Glyma.02G164100	30	0	0	0	6	0	18	36	30	36	0	0	18	0	6	0	30	0	0	0	0	12	18	0	36	30	0	0	0	18	288	9.53885e-54	2.49918e-49	2.49088e-49	2.83998e-51
Glyma.09G197100	32	0	0	0	24	0	0	24	24	24	0	32	24	8	24	0	32	8	0	24	0	16	24	32	32	24	24	0	0	56	376	1.74092e-53	4.56122e-49	4.5459e-49	5.12497e-51
Glyma.03G138100	15	0	0	0	20	0	0	25	30	25	0	0	5	10	0	0	30	5	0	5	0	5	15	10	25	25	5	0	0	5	250	3.97613e-53	1.04175e-48	1.03821e-48	1.1575e-50
Glyma.04G240300	50	0	0	0	0	0	0	20	30	20	0	0	0	0	20	0	40	10	0	0	0	20	10	10	0	0	0	0	0	0	230	5.96132e-52	1.56187e-47	1.5565e-47	1.71634e-49
Glyma.18G176100	36	0	0	0	18	0	0	18	18	18	0	0	18	0	18	0	18	0	0	9	0	18	18	9	18	27	18	18	0	18	279	8.20585e-52	2.14993e-47	2.14247e-47	2.33688e-49
Glyma.16G019500	18	0	0	0	18	0	0	18	18	18	0	6	18	18	18	0	18	6	0	18	0	18	18	12	24	18	18	18	0	24	294	8.70833e-52	2.28158e-47	2.27357e-47	2.45331e-49
Glyma.10G095100	33	0	6	0	18	0	0	21	33	21	0	6	18	0	9	0	24	3	0	6	0	18	15	15	30	21	12	6	0	24	291	3.79457e-51	9.94179e-47	9.9065e-47	1.05764e-48
Glyma.08G264900	66	0	0	0	33	0	0	66	33	66	0	11	77	0	0	0	66	0	0	0	0	0	11	0	55	22	11	0	0	88	429	7.66253e-51	2.00758e-46	2.00038e-46	2.11325e-48
Glyma.03G065700	46	0	0	0	22	0	0	44	40	44	0	0	52	0	2	0	46	2	0	0	0	10	10	0	40	32	14	2	0	52	354	8.79513e-51	2.30432e-46	2.29597e-46	2.40034e-48
Glyma.05G082200	54	0	0	0	27	0	0	27	36	27	0	0	36	0	9	0	45	0	0	0	0	18	9	9	18	27	9	0	0	36	315	3.71943e-50	9.7449e-46	9.70919e-46	1.00463e-47
Glyma.18G136200	24	0	8	0	16	0	0	48	16	48	0	8	24	0	8	0	32	8	0	8	0	16	8	8	24	16	16	0	0	32	304	8.21932e-50	2.15346e-45	2.14549e-45	2.19741e-47
Glyma.10G102400	21	0	0	0	14	0	0	28	42	28	0	0	14	0	7	0	21	0	0	14	0	14	14	0	21	28	7	0	0	14	259	9.64603e-50	2.52726e-45	2.51781e-45	2.55279e-47
Glyma.17G172100	26	0	0	0	8	0	0	48	18	48	0	8	26	2	8	0	56	0	0	0	0	8	4	0	26	42	14	0	0	34	308	1.15075e-49	3.01497e-45	3.00358e-45	3.01497e-47
Glyma.01G117000	21	0	0	0	18	12	24	0	0	0	0	0	0	0	15	0	27	0	0	0	0	21	15	6	21	21	15	3	0	0	219	1.49455e-49	3.91573e-45	3.90078e-45	3.87696e-47
Glyma.09G113500	40	0	0	0	16	0	0	68	32	68	0	0	56	0	4	0	72	0	0	0	0	4	0	0	32	20	0	0	0	56	356	1.97344e-49	5.17042e-45	5.15049e-45	5.06904e-47
Glyma.20G120300	45	0	0	0	45	0	0	0	0	0	0	0	45	15	0	0	45	45	0	15	0	0	15	0	0	45	45	15	0	45	330	4.98926e-49	1.30719e-44	1.3021e-44	1.26911e-46
Glyma.06G268700	15	0	0	0	15	0	0	0	25	0	0	5	0	0	15	0	30	0	0	0	0	15	15	10	40	35	15	0	0	5	230	8.99992e-49	2.35798e-44	2.34871e-44	2.26729e-46
Glyma.15G204933	6	6	4	6	22	0	0	10	38	10	10	12	38	16	20	4	40	8	6	24	2	24	4	20	22	30	18	20	0	60	360	1.59547e-48	4.18013e-44	4.16354e-44	3.98107e-46
Glyma.15G233100	40	2	8	0	24	0	0	40	38	40	10	12	44	8	16	4	8	0	8	12	2	32	10	14	42	20	4	0	0	66	372	2.05604e-48	5.38683e-44	5.36524e-44	5.08191e-46
Glyma.19G063600	66	0	2	0	8	0	0	24	50	24	0	2	78	0	12	0	48	2	0	4	0	14	14	6	54	48	14	10	0	80	400	2.57427e-48	6.74458e-44	6.71703e-44	6.24498e-46
Glyma.02G190000	15	0	5	0	20	0	10	30	35	30	0	5	10	0	5	0	5	0	0	0	0	30	0	5	15	25	25	0	0	15	255	2.57427e-48	6.74458e-44	6.71703e-44	6.24498e-46
Glyma.04G140900	16	0	0	0	12	0	0	28	44	28	0	8	16	0	12	0	44	4	0	0	0	0	8	12	36	16	16	0	0	24	276	5.90669e-48	1.54755e-43	1.54117e-43	1.41977e-45
Glyma.13G029700	30	2	0	0	4	0	0	6	28	6	0	0	4	0	2	0	32	0	0	0	0	20	18	2	32	28	12	0	0	4	222	1.19147e-47	3.12165e-43	3.10866e-43	2.83786e-45
Glyma.05G082400	35	0	0	0	7	0	0	77	28	77	0	0	42	0	0	0	28	0	0	0	0	0	0	0	49	14	0	0	0	42	315	2.55491e-47	6.69387e-43	6.66576e-43	6.03051e-45
Glyma.01G245200	27	0	0	0	0	0	27	18	0	18	0	0	0	0	0	0	27	0	0	18	0	0	0	0	27	27	18	0	0	0	207	6.20016e-47	1.62444e-42	1.61756e-42	1.45039e-44
Glyma.09G099100	20	0	0	0	40	0	0	45	10	45	0	5	25	20	0	0	10	0	0	5	0	25	5	0	40	10	10	0	0	30	285	8.26193e-47	2.16463e-42	2.15537e-42	1.9156e-44
Glyma.07G164900	18	0	0	0	12	0	0	48	30	48	0	0	42	0	24	0	24	0	0	0	0	24	18	0	36	24	6	0	0	42	312	1.06019e-46	2.7777e-42	2.76572e-42	2.43658e-44
Glyma.12G080600	0	0	0	0	20	0	0	0	20	0	0	0	20	10	20	0	30	0	0	20	20	20	20	20	20	20	20	0	0	20	260	1.18286e-46	3.09909e-42	3.0856e-42	2.69486e-44
Glyma.19G097300	22	0	0	0	0	0	0	22	0	22	0	0	22	0	22	0	33	0	0	33	0	22	0	11	22	33	22	0	0	22	264	1.90169e-46	4.98241e-42	4.96055e-42	4.29519e-44
Glyma.16G164500	18	0	9	0	15	0	0	15	15	15	0	6	15	0	12	0	18	15	0	9	0	15	18	12	18	18	18	18	3	21	261	2.46192e-46	6.45022e-42	6.42167e-42	5.51301e-44
Glyma.19G070600	48	0	0	0	4	0	0	22	48	22	0	2	64	0	12	0	46	0	0	2	0	24	24	0	40	46	20	2	0	66	360	4.86073e-46	1.27351e-41	1.26783e-41	1.07925e-43
Glyma.10G096800	28	2	0	0	12	0	0	30	24	30	0	4	26	8	4	0	26	0	0	6	0	14	16	0	36	30	10	4	0	30	280	9.28682e-46	2.43315e-41	2.42219e-41	2.04466e-43
Glyma.01G244800	16	0	16	0	0	0	16	16	0	16	0	0	0	0	0	0	16	16	0	16	0	0	16	0	16	16	16	8	0	0	200	2.08849e-45	5.47184e-41	5.44698e-41	4.55986e-43
Glyma.17G232200	14	0	14	0	7	0	0	21	21	21	0	14	14	0	14	0	21	7	0	14	14	14	14	14	14	21	21	7	0	28	273	2.79709e-45	7.32837e-41	7.29481e-41	6.05651e-43
Glyma.01G096300	20	0	0	0	15	20	20	25	20	25	0	0	25	0	0	0	30	0	0	5	0	15	20	0	25	15	10	0	0	25	265	4.1767e-45	1.0943e-40	1.08924e-40	8.96964e-43
Glyma.10G060100	12	0	3	0	18	0	0	18	18	18	0	12	0	12	0	9	15	3	0	3	6	15	12	9	21	21	15	3	0	12	231	7.82879e-45	2.05114e-40	2.04159e-40	1.6676e-42
Glyma.06G223900	12	0	0	0	24	0	0	36	36	36	0	4	12	0	8	0	12	0	0	4	0	12	8	0	32	12	8	0	0	16	240	1.55871e-44	4.08381e-40	4.06449e-40	3.26705e-42
Glyma.09G068800	9	0	0	0	18	0	0	36	36	36	0	27	9	9	9	0	9	0	0	9	0	27	18	27	36	9	0	0	0	36	288	1.55871e-44	4.08381e-40	4.06449e-40	3.26705e-42
Glyma.14G049600	15	0	0	0	15	0	0	25	15	25	0	5	15	15	10	0	15	10	0	10	0	15	10	15	15	15	10	15	0	20	250	1.61782e-44	4.23869e-40	4.21847e-40	3.36404e-42
Glyma.17G172500	20	0	6	0	12	0	0	38	16	38	0	6	24	0	6	0	30	4	0	0	0	12	20	6	18	30	12	6	0	30	274	1.68742e-44	4.42105e-40	4.39979e-40	3.48114e-42
Glyma.13G024401	42	0	0	0	2	0	0	64	36	64	0	0	48	0	2	0	46	0	0	0	0	2	0	0	32	22	2	0	0	48	314	2.04612e-44	5.36083e-40	5.33484e-40	4.18815e-42
Glyma.01G111000	18	0	0	0	12	18	0	18	18	18	0	0	0	0	12	0	0	0	0	6	0	6	18	0	18	12	12	6	0	0	192	1.16355e-43	3.04851e-39	3.03361e-39	2.36318e-41
Glyma.12G218100	20	0	0	0	20	0	0	20	20	20	0	0	10	0	10	0	20	0	0	0	0	20	20	0	20	20	10	0	0	10	220	1.32656e-43	3.47557e-39	3.45846e-39	2.67352e-41
Glyma.18G154100	33	0	3	0	24	0	0	6	33	6	0	6	39	0	18	0	36	0	0	6	0	18	21	3	30	33	30	3	0	45	303	1.67434e-43	4.38676e-39	4.365e-39	3.34867e-41
Glyma.01G096700	20	0	0	0	15	20	20	20	15	20	0	0	20	0	15	0	20	0	0	0	0	10	15	0	20	20	15	0	0	20	245	1.8872e-43	4.94447e-39	4.91975e-39	3.74581e-41
Glyma.18G207500	33	0	0	0	11	0	0	33	33	33	0	0	33	0	0	0	11	0	0	0	0	33	11	0	33	22	11	11	0	33	275	2.95902e-43	7.75264e-39	7.71358e-39	5.82906e-41
Glyma.01G067000	20	0	0	0	4	16	16	16	20	16	0	0	20	4	12	0	32	0	0	4	0	8	4	0	36	20	8	4	4	20	244	3.08391e-43	8.07985e-39	8.03883e-39	6.02974e-41
Glyma.14G116000	21	0	21	0	0	0	0	0	21	0	0	0	0	0	0	0	84	0	0	0	0	0	0	0	42	0	0	0	0	0	189	5.25548e-43	1.37694e-38	1.36989e-38	1.01995e-40
Glyma.04G142800	16	0	4	0	8	0	0	12	44	12	0	4	20	0	24	0	32	0	0	4	0	8	28	12	28	8	8	4	0	24	252	7.29412e-43	1.91106e-38	1.90121e-38	1.40519e-40
Glyma.19G065700	45	0	0	0	0	0	0	0	45	0	0	0	55	0	0	0	40	0	0	0	0	30	25	5	50	55	25	0	0	55	320	1.25597e-42	3.29065e-38	3.27357e-38	2.40194e-40
Glyma.10G106000	36	0	6	0	6	0	0	6	48	6	0	0	6	0	0	0	12	0	0	0	0	6	6	12	42	6	6	6	0	6	204	1.6819e-42	4.40658e-38	4.38354e-38	3.19318e-40
Glyma.07G167000	39	2	0	0	11	0	0	34	29	34	0	0	33	0	5	0	39	0	0	0	0	8	9	1	33	19	7	1	0	33	271	2.01225e-42	5.2721e-38	5.24434e-38	3.79288e-40
Glyma.08G025000	28	0	0	0	14	0	0	14	14	14	0	0	14	14	14	0	14	0	0	0	0	14	14	14	14	28	14	0	0	14	224	3.38524e-42	8.86934e-38	8.82228e-38	6.33524e-40
Glyma.04G119500	27	0	0	0	9	0	0	18	18	18	0	0	18	0	18	0	27	0	0	0	0	27	9	0	27	18	9	9	0	18	234	3.65268e-42	9.57001e-38	9.51851e-38	6.73944e-40
Glyma.14G135900	18	0	0	0	18	0	0	18	18	18	0	0	18	6	12	0	18	6	0	6	0	18	6	6	30	18	12	6	0	18	234	3.65268e-42	9.57001e-38	9.51851e-38	6.73944e-40
Glyma.07G198000	20	0	4	0	12	0	0	12	12	12	0	12	12	12	12	0	16	8	0	16	0	12	12	20	24	20	20	4	0	24	248	5.12123e-42	1.34176e-37	1.33449e-37	9.38295e-40
Glyma.18G153300	48	0	0	0	21	0	0	6	45	6	0	0	60	0	9	0	48	0	0	12	0	9	24	0	42	33	15	9	0	60	327	5.84004e-42	1.53009e-37	1.52174e-37	1.06256e-39
Glyma.10G091800	30	0	5	0	10	0	0	15	25	15	0	10	15	5	10	0	20	0	0	0	0	30	10	20	30	15	10	0	0	25	250	6.19816e-42	1.62392e-37	1.61499e-37	1.11994e-39
Glyma.01G074200	24	1	0	0	6	26	10	32	16	32	0	2	39	0	2	0	58	0	0	0	0	6	7	0	40	19	4	2	0	41	285	1.29459e-41	3.39182e-37	3.37305e-37	2.32316e-39
Glyma.01G117200	12	0	0	0	12	20	20	16	20	16	0	0	12	0	8	0	32	0	0	4	0	8	8	4	12	12	12	0	0	12	216	1.36096e-41	3.5657e-37	3.5457e-37	2.40926e-39
Glyma.17G189950	24	0	0	0	6	0	0	24	12	24	0	6	6	0	0	0	36	0	0	6	0	12	0	0	24	24	24	0	0	12	216	1.36096e-41	3.5657e-37	3.5457e-37	2.40926e-39
Glyma.02G235800	14	0	14	0	0	0	0	14	0	14	0	0	0	0	14	0	14	14	0	0	0	0	14	14	14	14	14	14	0	0	182	1.77318e-41	4.64572e-37	4.61948e-37	3.11794e-39
Glyma.01G074000	15	0	0	0	5	15	10	15	10	15	0	0	10	0	5	0	55	0	0	0	0	5	5	0	45	5	5	0	0	10	210	1.94289e-41	5.09037e-37	5.06142e-37	3.39358e-39
Glyma.16G096400	27	0	0	0	9	0	0	18	54	18	0	0	27	9	9	0	18	0	0	0	0	27	9	0	18	18	9	9	0	27	252	2.33605e-41	6.12044e-37	6.0854e-37	4.05327e-39
Glyma.04G139100	3	0	0	0	3	0	0	6	42	6	0	0	6	0	9	0	63	0	0	3	0	0	21	0	33	3	6	0	0	6	198	3.39859e-41	8.90431e-37	8.853e-37	5.8581e-39
Glyma.11G168100	15	0	0	0	15	0	0	30	40	30	0	5	20	5	5	0	30	0	0	0	0	10	5	5	30	15	5	5	0	25	245	7.03325e-41	1.84271e-36	1.83202e-36	1.20439e-38
Glyma.09G113800	45	0	0	0	12	0	0	30	27	30	0	0	36	0	3	0	36	0	0	0	0	18	9	0	39	12	3	6	0	36	270	8.25293e-41	2.16227e-36	2.14964e-36	1.40407e-38
Glyma.18G154200	54	0	0	0	14	0	0	4	44	4	0	2	68	2	12	0	54	0	0	4	0	24	28	0	40	42	14	0	0	70	340	1.46124e-40	3.82844e-36	3.80594e-36	2.46996e-38
Glyma.U031132	1	0	0	1	12	0	0	65	29	65	2	7	32	0	4	0	24	0	0	2	0	12	2	1	3	38	14	6	0	41	279	2.17642e-40	5.70222e-36	5.66848e-36	3.65527e-38
Glyma.17G213466	36	0	4	0	4	0	0	28	10	28	2	4	14	0	4	0	22	0	0	2	0	10	6	12	32	16	10	6	0	20	230	2.96135e-40	7.75873e-36	7.71224e-36	4.91059e-38
Glyma.17G244600	20	0	10	0	20	0	0	20	20	20	0	20	0	0	0	0	0	0	0	0	0	20	0	20	20	20	20	20	0	20	230	2.96135e-40	7.75873e-36	7.71224e-36	4.91059e-38
Glyma.04G111200	24	0	0	0	0	0	0	0	16	0	0	0	0	8	8	0	32	0	0	0	0	24	16	8	16	8	16	0	0	0	176	3.62106e-40	9.48718e-36	9.42997e-36	5.96678e-38
Glyma.09G081800	16	0	0	0	20	0	0	20	20	20	0	4	16	4	16	0	0	4	0	0	0	16	4	16	28	16	16	12	0	20	228	7.8879e-40	2.06663e-35	2.05409e-35	1.29164e-37
Glyma.04G143300	44	6	0	4	10	0	0	46	18	46	6	0	66	6	6	0	30	6	0	6	4	16	16	0	18	32	12	8	6	72	340	8.3849e-40	2.19684e-35	2.18343e-35	1.3645e-37
Glyma.03G134200	16	0	0	0	24	0	0	8	24	8	0	24	8	0	8	0	24	0	8	8	16	24	16	24	24	8	16	0	0	32	256	8.85229e-40	2.3193e-35	2.30505e-35	1.43167e-37
Glyma.01G111300	12	0	0	0	12	12	6	12	12	12	0	0	0	0	12	0	6	0	0	12	0	12	12	6	12	12	12	0	0	0	174	9.89884e-40	2.5935e-35	2.57736e-35	1.5814e-37
Glyma.01G112700	12	0	0	0	9	12	15	12	12	12	0	0	0	3	9	0	15	0	0	3	0	12	9	6	12	15	6	0	0	0	174	9.89884e-40	2.5935e-35	2.57736e-35	1.5814e-37
Glyma.02G160900	36	0	0	0	12	0	15	21	18	21	0	0	15	0	6	0	21	0	0	0	0	6	0	0	39	15	3	0	0	15	213	2.77879e-39	7.28043e-35	7.23486e-35	4.41238e-37
Glyma.12G144400	20	0	0	0	10	0	0	30	10	30	0	0	10	0	0	0	20	0	0	0	0	10	10	10	10	20	20	0	0	10	200	2.83897e-39	7.4381e-35	7.39126e-35	4.48078e-37
Glyma.09G097600	10	0	0	0	25	0	0	40	20	40	0	0	35	5	5	0	25	0	0	0	0	20	10	0	40	15	5	0	0	35	260	3.2923e-39	8.62582e-35	8.57116e-35	5.16516e-37
Glyma.08G195600	20	0	4	0	20	0	0	20	20	20	0	4	24	4	12	8	20	0	0	16	0	0	0	12	20	20	20	8	0	28	244	3.42875e-39	8.98333e-35	8.92607e-35	5.34722e-37
Glyma.09G108328	16	0	0	0	12	0	0	28	20	28	0	0	12	0	12	0	16	0	0	0	0	8	0	4	28	16	12	4	0	12	204	5.29129e-39	1.38632e-34	1.37743e-34	8.19528e-37
Glyma.11G175700	25	0	0	0	5	0	0	30	30	30	0	0	40	0	15	0	40	0	0	0	0	20	20	0	25	15	15	0	0	40	270	5.34883e-39	1.40139e-34	1.3923e-34	8.19528e-37
Glyma.02G161566	23	1	0	0	6	0	7	42	29	42	1	0	39	0	7	0	31	0	0	3	0	12	3	0	30	20	8	6	0	40	270	5.34882e-39	1.40139e-34	1.3923e-34	8.19528e-37
Glyma.10G099700	60	0	0	0	4	0	0	12	32	12	0	0	20	0	0	0	20	0	0	0	0	4	0	8	48	16	4	4	0	20	224	5.59025e-39	1.46464e-34	1.45509e-34	8.51538e-37
Glyma.09G098400	0	0	0	0	35	0	0	35	0	35	0	7	0	0	0	0	0	0	0	7	0	28	7	0	35	7	0	0	0	7	189	1.22343e-38	3.20539e-34	3.18435e-34	1.85283e-36
Glyma.09G140000	12	0	6	0	12	0	0	42	18	42	0	0	18	6	0	0	12	0	0	12	0	0	6	0	36	12	0	0	0	18	216	2.55161e-38	6.68521e-34	6.64081e-34	3.82012e-36
Glyma.13G045400	18	0	18	0	0	0	0	0	0	0	0	0	18	0	0	0	18	0	18	54	0	18	18	18	18	0	0	18	0	18	216	2.55161e-38	6.68521e-34	6.64081e-34	3.82012e-36
Glyma.17G192300	25	0	5	0	5	0	0	25	5	25	0	5	5	5	5	0	20	0	0	0	0	10	10	0	20	15	10	10	0	10	195	3.42835e-38	8.98228e-34	8.92228e-34	5.10357e-36
Glyma.03G064800	24	0	0	0	16	0	0	24	24	24	0	0	32	0	12	0	36	0	0	0	0	16	8	0	22	26	14	2	0	32	248	4.03239e-38	1.05649e-33	1.04939e-33	5.96885e-36
Glyma.01G142300	21	0	0	0	12	0	18	18	18	18	0	0	3	3	3	0	18	0	0	0	0	6	3	6	12	9	6	3	0	3	174	8.2581e-38	2.16362e-33	2.14901e-33	1.21552e-35
Glyma.01G076100	25	0	0	0	0	15	15	20	15	20	0	0	15	0	15	0	15	0	0	5	0	10	5	0	15	20	10	0	0	15	205	1.44511e-37	3.7862e-33	3.76048e-33	2.11519e-35
Glyma.13G026700	21	0	0	0	7	0	0	7	21	7	0	0	7	0	0	0	21	7	0	0	0	21	14	0	28	21	7	0	0	7	182	4.06067e-37	1.0639e-32	1.05663e-32	5.91053e-35
Glyma.08G263000	21	0	0	0	21	0	0	21	21	21	0	0	21	0	14	0	21	0	0	0	0	14	7	0	21	21	14	0	0	21	217	5.56164e-37	1.45715e-32	1.44714e-32	8.05055e-35
Glyma.17G181950	27	3	3	4	5	0	0	34	17	34	5	6	37	4	5	3	41	3	3	3	3	14	12	5	15	23	10	3	3	48	277	5.71722e-37	1.49791e-32	1.48756e-32	8.23028e-35
Glyma.15G223000	0	0	0	0	27	0	0	0	27	0	0	27	36	18	27	0	36	0	0	9	0	36	0	27	27	36	18	18	0	63	306	1.11768e-36	2.92833e-32	2.90799e-32	1.60018e-34
Glyma.16G187500	10	0	0	0	5	0	0	25	20	25	0	5	20	0	15	0	10	0	0	5	0	5	15	10	20	10	25	25	0	25	225	1.13148e-36	2.96449e-32	2.94367e-32	1.60243e-34
Glyma.10G213100	0	0	20	0	0	0	0	0	20	0	0	0	0	0	0	0	20	0	0	20	0	20	0	20	20	0	20	0	0	0	160	1.13148e-36	2.96449e-32	2.94367e-32	1.60243e-34
Glyma.18G233500	15	0	5	0	10	0	0	15	10	15	0	5	10	5	15	0	15	5	10	0	0	15	5	15	15	15	15	0	0	15	200	1.70408e-36	4.46469e-32	4.43317e-32	2.40037e-34
Glyma.10G104300	32	0	0	0	8	0	0	28	36	28	0	2	30	0	6	0	22	0	0	2	0	16	12	0	26	18	4	2	0	32	240	1.81672e-36	4.7598e-32	4.72601e-32	2.54535e-34
Glyma.17G214600	24	0	0	0	0	0	0	24	12	24	0	0	12	0	12	0	12	0	12	0	0	0	12	0	24	12	12	12	0	12	192	2.04503e-36	5.35797e-32	5.31973e-32	2.84998e-34
Glyma.15G053000	14	0	0	0	14	0	0	14	14	14	0	0	14	0	14	0	14	0	0	0	0	14	14	14	14	14	14	14	0	14	196	3.53923e-36	9.27279e-32	9.20625e-32	4.90624e-34
Glyma.03G173000	10	0	0	0	0	0	0	20	20	20	0	20	0	20	0	0	20	10	10	0	0	10	20	0	20	0	10	20	0	20	210	5.23179e-36	1.37073e-31	1.36084e-31	7.21437e-34
Glyma.17G191900	24	0	0	0	6	0	0	12	6	12	0	0	6	0	0	0	18	0	0	0	0	12	0	6	18	18	18	24	0	6	174	5.66047e-36	1.48304e-31	1.47229e-31	7.76463e-34
Glyma.01G112500	12	0	0	0	6	12	12	12	12	12	0	0	2	0	4	0	12	0	0	8	0	14	8	2	12	12	10	2	0	2	162	8.06025e-36	2.11178e-31	2.09639e-31	1.09989e-33
Glyma.16G137000	24	0	0	0	18	0	0	30	12	30	0	0	18	0	12	0	24	6	0	6	0	18	0	6	6	6	6	0	0	18	204	9.18552e-36	2.40661e-31	2.38888e-31	1.24052e-33
Glyma.02G163900	21	0	0	0	18	0	15	27	21	27	0	0	18	0	0	0	15	0	0	3	0	9	3	0	21	18	6	0	0	18	204	9.18552e-36	2.40661e-31	2.38888e-31	1.24052e-33
Glyma.13G163500	14	0	0	0	14	0	0	21	14	21	0	7	14	0	7	0	14	0	0	0	0	21	21	7	14	14	21	7	0	21	210	1.68136e-35	4.40516e-31	4.37254e-31	2.25906e-33
Glyma.17G172200	28	0	0	0	16	0	0	32	28	32	0	4	36	0	8	0	28	0	0	4	0	12	4	0	24	24	12	0	0	40	252	2.41374e-35	6.32401e-31	6.27694e-31	3.22653e-33
Glyma.07G088400	15	0	0	0	0	0	0	15	15	15	0	15	15	15	15	0	15	5	0	0	15	15	15	20	15	15	15	10	0	30	230	2.50236e-35	6.55619e-31	6.50715e-31	3.32802e-33
Glyma.09G097402	24	0	0	0	18	0	0	30	18	30	0	6	18	12	6	0	24	0	0	0	0	12	0	0	24	18	0	0	0	24	216	2.83234e-35	7.42073e-31	7.36465e-31	3.72901e-33
Glyma.18G169800	32	0	0	0	24	0	0	24	24	24	0	0	24	0	0	0	24	0	0	0	0	8	16	0	24	8	8	0	0	24	216	2.83234e-35	7.42073e-31	7.36465e-31	3.72901e-33
Glyma.01G105900	16	0	0	0	16	16	8	8	8	8	0	0	8	0	16	0	8	0	0	0	0	8	8	0	40	8	8	0	0	8	176	3.14597e-35	8.24244e-31	8.17984e-31	4.12122e-33
Glyma.04G163600	20	0	0	0	0	0	0	10	25	10	0	15	20	5	10	0	65	10	0	0	0	0	20	15	25	20	5	0	0	35	240	4.19768e-35	1.09979e-30	1.0914e-30	5.4716e-33
Glyma.18G214800	15	0	0	0	5	0	0	15	5	15	0	5	5	0	5	0	20	0	5	0	0	15	10	10	25	15	15	5	0	10	180	6.00925e-35	1.57442e-30	1.56234e-30	7.79417e-33
Glyma.17G214100	24	0	0	0	0	0	0	24	0	24	0	0	0	0	0	0	20	0	0	0	0	4	0	4	24	12	12	4	0	0	152	6.33616e-35	1.66007e-30	1.64727e-30	8.1777e-33
Glyma.15G232000	18	0	0	0	18	0	0	18	18	18	0	12	18	12	12	0	0	0	0	6	0	12	12	18	18	18	18	12	0	30	228	6.48622e-35	1.69939e-30	1.68622e-30	8.33034e-33
Glyma.04G138300	15	0	0	0	9	0	0	18	27	18	0	6	15	3	12	0	27	0	0	0	6	9	15	6	27	9	6	0	0	21	207	7.23338e-35	1.89515e-30	1.88039e-30	9.24462e-33
Glyma.01G071800	12	0	0	0	12	12	12	12	12	12	0	0	12	0	8	0	24	0	0	4	0	8	12	0	24	12	4	4	0	12	184	1.08086e-34	2.83186e-30	2.8097e-30	1.37469e-32
Glyma.07G125200	15	0	3	0	18	0	0	15	15	15	0	3	15	12	12	0	18	0	0	0	0	12	12	6	9	18	15	3	0	18	198	1.73364e-34	4.54215e-30	4.50643e-30	2.19427e-32
Glyma.18G187200	20	0	0	0	16	0	0	16	16	16	0	8	16	4	16	0	4	8	0	4	0	16	16	16	16	16	12	0	0	24	212	1.95355e-34	5.11831e-30	5.07787e-30	2.46073e-32
Glyma.04G146800	23	5	0	0	9	0	0	21	23	21	0	6	22	4	5	0	26	1	0	0	0	12	8	0	29	20	10	3	0	28	220	3.4285e-34	8.98267e-30	8.91135e-30	4.29793e-32
Glyma.18G254700	8	0	2	0	14	0	0	22	20	22	6	6	18	0	16	2	24	8	0	12	0	12	12	12	12	10	16	0	0	30	224	4.34775e-34	1.13911e-29	1.13002e-29	5.42433e-32
Glyma.18G149700	30	0	5	0	15	0	0	5	20	5	0	5	30	5	10	0	30	0	0	0	0	15	15	10	20	25	15	10	0	35	235	4.40298e-34	1.15358e-29	1.14433e-29	5.46721e-32
Glyma.13G024100	39	0	0	0	9	0	0	25	27	25	1	2	41	1	3	0	51	0	0	1	1	7	8	0	27	24	4	2	0	44	254	4.77601e-34	1.25132e-29	1.24124e-29	5.90243e-32
Glyma.03G012600	14	0	0	0	14	0	0	14	14	14	0	7	14	0	14	0	14	7	0	0	7	14	14	14	14	14	14	7	0	21	203	5.05191e-34	1.3236e-29	1.31289e-29	6.21409e-32
Glyma.04G139400	6	0	0	0	3	0	0	9	30	9	0	6	0	0	15	0	30	0	0	0	0	0	18	9	27	3	6	0	0	6	165	5.13625e-34	1.3457e-29	1.33476e-29	6.28831e-32
Glyma.05G085400	20	0	0	0	15	0	0	25	20	25	0	0	20	10	10	0	10	0	0	0	0	20	5	0	15	20	5	0	0	20	200	6.84088e-34	1.79231e-29	1.77767e-29	8.33633e-32
Glyma.19G069000	22	4	7	1	6	0	0	13	25	13	2	5	24	0	10	0	24	0	0	8	9	8	21	4	17	18	8	7	0	31	225	7.78602e-34	2.03994e-29	2.0232e-29	9.44415e-32
Glyma.18G153800	30	0	0	0	18	0	0	4	28	4	0	2	36	4	18	0	26	0	0	2	0	24	18	2	26	24	12	0	0	38	240	8.77981e-34	2.30031e-29	2.28135e-29	1.06005e-31
Glyma.01G120100	18	0	4	2	2	8	14	8	8	8	0	0	0	4	4	0	16	0	0	0	0	4	8	6	16	8	4	4	0	0	146	1.2982e-33	3.40128e-29	3.37311e-29	1.56022e-31
Glyma.15G247600	16	0	4	0	12	0	0	24	24	24	0	8	16	4	4	0	16	4	4	0	0	8	8	8	20	12	8	8	0	24	208	1.34406e-33	3.52143e-29	3.49213e-29	1.60796e-31
Glyma.18G228700	24	0	0	0	0	0	0	16	0	16	0	8	0	0	4	0	12	4	4	12	0	8	8	8	16	20	16	0	0	8	168	1.70839e-33	4.47598e-29	4.43857e-29	2.03454e-31
Glyma.17G149000	0	0	12	0	0	0	0	0	0	0	0	16	0	0	0	0	24	24	0	0	0	24	16	0	24	24	24	16	0	16	188	2.12654e-33	5.57154e-29	5.52476e-29	2.52106e-31
Glyma.04G184000	18	0	6	0	0	0	0	12	18	12	0	0	6	0	6	0	18	0	0	6	0	18	0	6	18	18	6	0	0	6	162	2.30777e-33	6.04637e-29	5.99536e-29	2.72359e-31
Glyma.15G212800	10	0	5	0	10	0	0	10	15	10	0	5	10	0	5	0	10	5	0	5	0	40	5	10	15	15	10	5	0	15	185	2.76232e-33	7.23729e-29	7.17596e-29	3.24542e-31
Glyma.16G111700	63	0	0	0	21	0	0	7	7	7	0	0	35	7	7	0	49	0	0	0	0	7	7	0	21	21	7	0	0	35	231	2.87432e-33	7.53072e-29	7.46662e-29	3.36193e-31
Glyma.01G095166	10	8	3	6	9	18	8	13	14	13	3	9	11	3	6	0	12	3	0	3	6	12	8	7	13	9	12	7	1	23	204	3.02191e-33	7.9174e-29	7.84971e-29	3.51885e-31
Glyma.19G064500	36	0	0	0	3	0	0	15	30	15	0	0	45	0	6	0	27	0	0	0	0	15	18	3	36	36	9	3	0	45	252	3.09716e-33	8.11456e-29	8.04487e-29	3.59051e-31
Glyma.09G207400	14	0	0	0	7	0	0	14	7	14	0	7	7	14	7	0	14	7	0	0	0	14	7	7	14	14	14	14	0	14	182	3.55296e-33	9.30877e-29	9.22776e-29	4.06496e-31
Glyma.18G052000	18	0	0	0	0	0	0	18	18	18	0	0	0	0	0	0	18	0	0	0	0	18	18	18	0	0	0	0	0	0	144	3.55296e-33	9.30877e-29	9.22776e-29	4.06496e-31
Glyma.01G145200	18	0	0	0	12	0	18	18	18	18	0	0	0	6	9	0	18	0	0	6	0	0	0	0	3	0	0	0	0	0	144	3.55296e-33	9.30877e-29	9.22776e-29	4.06496e-31
Glyma.10G093400	28	0	0	0	8	0	0	8	24	8	0	0	12	0	8	0	16	0	0	0	0	24	8	4	24	8	8	0	0	12	176	5.69213e-33	1.49134e-28	1.4783e-28	6.48408e-31
Glyma.06G072200	16	0	0	0	8	0	0	16	16	16	0	0	16	0	8	0	16	0	0	0	0	16	16	8	16	16	8	8	0	16	184	1.51462e-32	3.96829e-28	3.9333e-28	1.71047e-30
Glyma.07G201800	20	0	0	0	8	0	0	12	12	12	0	8	8	4	12	0	12	0	8	4	0	12	12	8	16	16	16	0	0	16	184	1.51462e-32	3.96829e-28	3.9333e-28	1.71047e-30
Glyma.19G074000	28	0	0	0	8	0	0	12	24	12	0	0	28	0	8	0	24	0	0	0	0	16	16	4	20	24	16	0	0	28	212	1.55584e-32	4.0763e-28	4.0402e-28	1.74948e-30
Glyma.11G176400	32	0	2	0	10	0	0	42	22	42	2	0	48	0	6	0	44	0	0	0	0	8	16	0	20	10	4	0	0	50	258	2.10366e-32	5.5116e-28	5.46258e-28	2.35538e-30
Glyma.09G141200	10	0	10	0	10	0	0	25	15	25	0	0	15	0	5	0	15	0	0	5	0	10	10	5	20	10	5	0	0	15	180	3.23088e-32	8.46491e-28	8.38931e-28	3.60209e-30
Glyma.18G149200	24	0	2	0	22	0	0	4	28	4	0	6	36	2	10	0	38	0	0	8	0	14	12	2	26	28	14	2	0	42	240	4.35756e-32	1.14168e-27	1.13144e-27	4.83763e-30
Glyma.06G220300	18	0	0	0	12	0	0	28	22	28	0	0	30	2	6	0	22	0	0	8	0	10	8	2	24	18	6	0	0	30	214	4.98508e-32	1.30609e-27	1.29433e-27	5.51093e-30
Glyma.16G096000	24	0	0	0	5	0	0	47	9	47	1	2	35	0	4	0	21	0	0	1	1	12	6	0	24	23	4	3	0	38	231	5.74564e-32	1.50536e-27	1.49168e-27	6.29857e-30
Glyma.19G064700	30	0	0	0	1	0	0	5	29	5	0	4	34	0	11	0	31	2	0	1	0	16	21	3	29	27	19	1	0	38	231	5.74564e-32	1.50536e-27	1.49168e-27	6.29857e-30
Glyma.13G362500	12	0	0	0	12	0	0	12	12	12	0	6	12	0	12	0	12	12	0	12	0	12	12	12	12	12	18	0	0	18	186	6.10102e-32	1.59847e-27	1.58388e-27	6.66028e-30
Glyma.18G065500	15	0	0	0	0	0	0	15	15	15	0	5	5	10	15	0	15	0	0	0	0	0	15	15	15	15	5	0	0	10	165	1.04425e-31	2.73594e-27	2.71088e-27	1.13524e-29
Glyma.02G163800	26	0	0	0	14	0	14	24	18	24	2	0	28	0	2	0	26	0	0	0	0	10	8	0	24	14	4	4	0	30	212	1.28353e-31	3.36285e-27	3.33192e-27	1.38961e-29
Glyma.10G236100	8	8	8	0	8	0	0	8	8	8	0	0	0	0	0	0	16	0	0	0	0	8	8	8	16	8	8	8	0	0	136	1.9953e-31	5.2277e-27	5.17941e-27	2.15132e-29
Glyma.02G196500	27	3	0	3	6	0	0	12	21	12	0	3	15	6	6	3	6	3	0	0	0	18	12	12	21	6	6	0	0	18	183	2.6351e-31	6.90396e-27	6.83993e-27	2.82949e-29
Glyma.03G065500	22	0	0	0	16	0	0	20	20	20	0	0	28	0	8	0	22	0	0	0	0	16	8	2	22	18	10	2	0	28	206	2.69693e-31	7.06596e-27	7.00016e-27	2.88407e-29
Glyma.12G179300	12	0	12	0	12	0	0	12	12	12	0	0	12	0	12	0	12	12	0	0	0	12	12	0	12	12	0	12	0	12	168	2.98531e-31	7.82152e-27	7.74808e-27	3.16661e-29
Glyma.04G141600	0	0	0	0	0	0	0	4	36	4	0	8	4	0	20	0	40	0	0	0	0	0	12	16	32	4	0	0	0	12	168	2.98531e-31	7.82152e-27	7.74808e-27	3.16661e-29
Glyma.14G073800	30	0	0	0	0	0	0	0	0	0	0	0	0	0	0	0	30	0	0	0	0	30	0	0	30	0	0	15	0	0	135	3.30169e-31	8.65042e-27	8.56854e-27	3.47407e-29
Glyma.17G173800	0	0	0	0	0	0	0	27	0	27	0	0	0	0	0	0	9	0	0	0	0	0	9	0	0	27	27	9	0	0	135	3.30169e-31	8.65042e-27	8.56854e-27	3.47407e-29
Glyma.09G141400	24	0	0	0	9	0	0	24	21	24	0	3	30	3	3	0	27	0	0	3	0	15	3	3	27	18	9	3	0	33	216	4.26012e-31	1.11615e-26	1.10554e-26	4.4646e-29
Glyma.11G185200	21	0	0	0	7	0	0	14	28	14	0	0	21	0	7	0	21	0	0	0	0	7	7	7	28	21	7	0	0	21	189	4.46661e-31	1.17025e-26	1.15908e-26	4.66236e-29
Glyma.18G148901	24	0	0	0	16	0	0	13	22	13	0	0	35	2	11	0	31	0	0	1	0	17	14	1	21	21	9	4	0	35	220	4.90111e-31	1.28409e-26	1.27179e-26	5.0956e-29
Glyma.19G055900	27	0	0	0	0	0	0	9	21	9	0	3	36	0	12	0	39	3	0	0	0	18	6	9	33	27	9	6	0	39	228	6.08378e-31	1.59395e-26	1.57862e-26	6.3002e-29
Glyma.05G104800	21	0	9	0	15	0	0	15	15	15	0	6	9	0	0	0	12	3	0	0	0	18	3	6	21	18	3	0	0	15	174	6.15966e-31	1.61383e-26	1.59825e-26	6.35367e-29
Glyma.10G046300	13	0	0	0	0	0	0	13	13	13	0	13	0	13	0	0	13	0	0	13	0	13	13	13	13	13	13	0	0	13	169	6.30919e-31	1.65301e-26	1.63698e-26	6.48238e-29
Glyma.06G223100	16	0	0	0	8	0	0	32	20	32	0	0	16	0	0	0	20	0	0	0	0	4	12	0	16	8	4	4	0	16	176	7.64376e-31	2.00266e-26	1.98317e-26	7.82291e-29
Glyma.09G113200	30	0	0	0	6	0	0	26	24	26	0	0	30	0	2	0	24	0	0	0	0	2	22	0	26	12	8	0	0	30	208	8.48498e-31	2.22307e-26	2.20134e-26	8.65006e-29
Glyma.18G159100	25	0	5	0	15	0	0	10	15	10	0	0	20	0	20	0	15	0	0	0	0	10	5	5	20	20	10	0	0	20	185	9.97492e-31	2.61343e-26	2.58779e-26	1.01296e-28
Glyma.04G180000	10	0	0	0	10	0	0	20	10	20	0	0	10	0	5	0	30	0	0	0	0	10	0	0	20	20	5	0	0	10	160	1.25249e-30	3.28153e-26	3.2491e-26	1.26213e-28
Glyma.10G109500	15	0	0	0	5	0	0	5	30	5	0	5	5	0	5	0	10	0	5	0	0	20	10	10	10	15	10	5	0	10	160	1.25249e-30	3.28153e-26	3.24909e-26	1.26213e-28
Glyma.03G064100	16	2	0	0	12	0	0	24	20	24	0	0	26	0	6	0	32	0	0	0	0	4	8	0	14	20	14	2	0	26	198	1.44331e-30	3.78148e-26	3.74396e-26	1.44884e-28
Glyma.12G142400	20	0	4	0	20	0	0	8	28	8	0	12	28	0	16	0	32	0	0	8	0	24	8	4	24	16	8	0	0	40	228	1.58895e-30	4.16304e-26	4.12156e-26	1.58894e-28
Glyma.15G199800	14	0	2	0	12	0	0	12	20	12	0	6	16	2	10	0	24	2	0	4	0	16	4	12	16	18	6	2	0	22	188	2.21737e-30	5.80951e-26	5.75142e-26	2.20894e-28
Glyma.05G088300	21	0	3	0	15	0	0	24	21	24	0	0	39	0	6	0	27	0	0	0	0	12	15	0	24	18	15	0	0	39	225	2.42001e-30	6.34042e-26	6.27678e-26	2.40168e-28
Glyma.02G166100	24	0	0	0	6	0	12	18	24	18	0	0	24	0	0	0	36	0	0	0	0	12	6	0	24	12	0	0	0	24	192	2.9288e-30	7.67345e-26	7.59554e-26	2.87395e-28
Glyma.06G202000	16	0	0	0	16	0	0	16	16	16	0	8	16	8	0	0	16	0	0	0	0	16	16	8	16	16	16	0	0	24	192	2.9288e-30	7.67345e-26	7.59554e-26	2.87395e-28
Glyma.12G114000	0	0	5	0	0	0	0	0	5	0	0	5	0	5	5	0	25	0	5	5	0	25	5	5	25	20	0	10	0	5	145	2.9288e-30	7.67345e-26	7.59554e-26	2.87395e-28
Glyma.06G286600	4	0	0	0	0	0	0	6	20	6	0	4	0	2	18	0	20	4	0	0	0	10	16	8	18	8	2	0	0	4	142	3.28579e-30	8.60878e-26	8.52105e-26	3.21223e-28
Glyma.06G269300	14	0	0	0	14	0	0	0	14	0	0	14	0	14	14	14	0	0	0	0	0	14	14	14	14	14	14	0	0	14	168	3.50936e-30	9.19452e-26	9.10047e-26	3.41804e-28
Glyma.12G170900	11	0	0	0	11	0	0	11	33	11	0	11	11	11	0	0	33	0	0	11	0	11	11	0	11	11	11	0	0	22	187	3.58898e-30	9.40314e-26	9.3066e-26	3.48264e-28
Glyma.01G123500	11	0	0	0	8	0	12	8	9	8	0	0	0	0	9	0	12	0	0	0	0	10	11	1	12	13	6	0	0	0	130	4.09778e-30	1.07362e-25	1.06251e-25	3.94712e-28
Glyma.04G104300	30	0	0	0	0	0	0	0	0	0	0	0	0	0	0	0	5	5	0	0	0	30	10	20	30	0	0	0	0	0	130	4.09778e-30	1.07362e-25	1.06251e-25	3.94712e-28
Glyma.03G070500	14	0	0	0	8	0	0	20	16	20	0	0	16	0	4	0	22	0	0	0	0	10	8	0	20	20	8	2	0	16	172	5.41483e-30	1.41868e-25	1.40396e-25	5.19665e-28
Glyma.15G147100	12	0	6	0	0	0	0	12	12	12	0	0	12	0	12	0	12	6	0	6	0	12	12	12	12	12	12	0	0	12	162	5.8002e-30	1.51965e-25	1.50376e-25	5.51335e-28
Glyma.01G070300	14	0	0	0	6	10	14	12	14	12	0	2	20	0	4	0	30	0	0	0	0	10	6	0	28	14	8	4	0	22	186	5.80795e-30	1.52168e-25	1.50571e-25	5.51335e-28
Glyma.05G218900	18	0	6	0	0	0	0	18	12	18	0	0	12	0	18	0	0	0	0	0	0	0	18	0	18	18	6	12	0	12	162	5.8002e-30	1.51965e-25	1.50376e-25	5.51335e-28
Glyma.10G085600	18	0	0	0	11	0	0	14	2	14	0	1	2	0	1	0	15	0	0	1	0	10	11	1	15	13	9	3	0	3	138	5.96324e-30	1.56237e-25	1.54591e-25	5.64033e-28
Glyma.18G188000	65	0	0	0	55	0	0	10	10	10	0	0	90	0	0	0	65	0	0	0	0	5	30	0	50	10	5	5	0	90	320	6.69901e-30	1.75514e-25	1.73658e-25	6.31346e-28
Glyma.08G270900	12	6	6	9	6	0	3	12	9	12	3	9	9	9	9	3	9	6	3	6	6	6	12	9	9	6	9	3	3	21	183	8.10165e-30	2.12263e-25	2.10011e-25	7.608e-28
Glyma.09G113900	17	2	1	0	12	0	0	34	21	34	1	3	36	3	4	0	25	1	0	2	1	7	8	0	22	16	8	6	0	40	224	9.93374e-30	2.60264e-25	2.57492e-25	9.29514e-28
Glyma.09G117200	24	0	0	0	4	0	0	24	12	24	0	0	20	0	4	0	32	0	0	0	0	12	8	0	24	12	0	0	0	20	180	1.12243e-29	2.94077e-25	2.90911e-25	1.03914e-27
Glyma.11G225300	12	0	0	0	0	0	0	0	12	0	0	0	0	0	12	0	12	0	0	0	0	0	12	12	16	16	16	8	0	0	128	1.12243e-29	2.94077e-25	2.90911e-25	1.03914e-27
Glyma.13G202500	9	0	0	0	9	0	0	9	9	9	0	0	9	9	9	0	9	0	0	9	0	9	9	9	9	9	18	9	0	9	153	1.12243e-29	2.94077e-25	2.90911e-25	1.03914e-27
Glyma.09G100600	7	3	3	0	6	0	0	11	6	11	1	4	6	2	12	1	12	2	2	9	2	9	11	10	10	9	9	9	2	11	158	1.2021e-29	3.14949e-25	3.11547e-25	1.10898e-27
Glyma.07G175700	18	0	0	0	16	0	0	26	28	26	0	4	28	0	2	0	18	0	0	0	0	6	12	2	20	20	12	0	0	32	206	1.67113e-29	4.37837e-25	4.33091e-25	1.53627e-27
Glyma.07G159300	0	0	0	0	4	0	0	36	32	36	0	4	20	0	16	0	12	0	0	0	0	16	4	0	32	0	0	0	0	24	188	1.98557e-29	5.2022e-25	5.14562e-25	1.81895e-27
Glyma.20G063501	14	5	2	1	11	0	0	20	17	20	2	3	11	2	3	0	18	0	0	2	2	7	2	0	13	15	6	7	2	16	169	2.34808e-29	6.15196e-25	6.0848e-25	2.14354e-27
Glyma.01G114000	8	0	6	0	6	6	6	8	8	8	0	0	2	6	8	2	10	6	0	0	0	8	6	8	8	6	6	2	0	2	132	2.89528e-29	7.58564e-25	7.50255e-25	2.6339e-27
Glyma.20G074000	7	0	0	0	7	0	0	0	14	0	0	0	0	0	0	0	14	0	0	7	0	7	14	14	14	14	14	0	0	0	126	3.07483e-29	8.05606e-25	7.96751e-25	2.78756e-27
Glyma.15G215400	3	0	0	0	21	0	0	3	33	3	0	6	33	0	15	0	33	0	0	3	0	21	3	6	15	30	21	9	0	39	219	3.79692e-29	9.94794e-25	9.83821e-25	3.43032e-27
Glyma.02G165800	52	0	0	0	4	0	8	12	8	12	0	0	16	0	0	0	12	0	0	0	0	0	4	0	44	12	0	0	0	16	168	3.828e-29	1.00294e-24	9.91836e-25	3.44652e-27
Glyma.10G159200	16	0	0	0	16	0	0	12	16	12	0	4	0	4	0	0	16	0	0	0	0	12	16	12	4	0	0	0	0	4	136	6.69087e-29	1.75301e-24	1.73341e-24	5.96262e-27
Glyma.13G224800	12	0	0	0	4	0	0	16	4	16	0	0	4	8	0	0	16	0	0	4	0	0	12	0	16	16	0	12	0	4	136	6.69087e-29	1.75301e-24	1.73341e-24	5.96262e-27
Glyma.14G125200	28	0	7	0	14	0	0	21	28	21	0	7	42	0	7	0	35	0	0	0	0	7	14	7	21	7	14	7	0	49	238	6.66976e-29	1.74748e-24	1.72807e-24	5.96262e-27
Glyma.19G007300	11	0	0	0	11	0	0	11	0	11	0	11	0	0	0	0	11	11	0	0	0	0	0	22	22	22	22	0	0	11	154	8.71221e-29	2.2826e-24	2.25698e-24	7.73762e-27
Glyma.06G226900	21	0	0	0	11	0	0	23	23	23	1	1	23	1	2	0	22	0	0	3	0	7	9	0	22	12	6	2	0	25	187	9.35327e-29	2.45056e-24	2.42296e-24	8.27891e-27
Glyma.11G154700	30	0	0	0	6	0	0	6	6	6	0	12	0	0	0	0	36	6	0	0	0	12	24	0	24	0	0	0	0	12	156	1.12359e-28	2.94381e-24	2.91033e-24	9.84552e-27
Glyma.14G116900	12	0	0	0	12	0	0	12	12	12	0	0	12	0	12	0	18	0	0	0	0	12	12	0	12	18	12	0	0	12	156	1.12359e-28	2.94381e-24	2.91033e-24	9.84552e-27
Glyma.18G107600	12	0	0	0	4	0	0	16	12	16	0	0	12	0	8	0	8	0	0	4	0	8	12	4	20	16	12	4	0	12	156	1.12359e-28	2.94381e-24	2.91033e-24	9.84552e-27
Glyma.10G120900	18	0	0	0	6	0	0	18	18	18	0	18	18	12	12	0	12	0	0	0	0	18	12	6	18	18	12	12	0	36	210	1.344e-28	3.52128e-24	3.48109e-24	1.17376e-26
Glyma.02G162300	24	0	0	0	6	0	10	10	10	10	0	0	10	0	4	0	10	2	0	2	0	8	10	4	24	10	6	0	0	10	150	1.79415e-28	4.70068e-24	4.64685e-24	1.56169e-26
Glyma.05G080400	24	0	0	0	12	0	0	24	28	24	0	0	28	0	0	0	24	0	0	0	0	4	16	0	16	16	4	0	0	28	192	2.03043e-28	5.31972e-24	5.25861e-24	1.7615e-26
Glyma.01G014100	8	0	8	0	8	8	8	8	8	8	0	8	0	8	0	0	16	8	0	8	0	8	8	8	8	0	8	0	0	8	144	2.70666e-28	7.09145e-24	7.00971e-24	2.34041e-26
Glyma.03G069700	24	0	1	0	14	0	0	20	17	20	0	1	34	1	5	0	23	0	0	2	0	13	11	1	20	23	9	2	0	35	206	3.23255e-28	8.46929e-24	8.37134e-24	2.78595e-26
Glyma.01G014000	12	0	12	0	12	6	12	6	6	6	0	6	0	0	0	6	6	0	0	6	0	12	12	12	6	0	6	0	0	6	138	3.82132e-28	1.00119e-23	9.89492e-24	3.26119e-26
Glyma.10G045600	12	0	6	0	6	0	0	12	12	12	0	0	6	0	6	0	12	6	0	0	0	12	6	6	12	12	6	0	0	6	138	3.82132e-28	1.00119e-23	9.89492e-24	3.26119e-26
Glyma.12G144800	13	0	0	0	13	0	0	13	13	13	0	0	13	0	13	0	13	0	0	13	0	13	13	0	13	13	0	0	0	13	156	3.82132e-28	1.00119e-23	9.89492e-24	3.26119e-26
Glyma.03G034809	3	0	6	1	8	0	0	13	0	13	0	7	5	6	0	1	20	7	1	5	5	9	7	11	15	11	5	6	0	12	153	4.93926e-28	1.29409e-23	1.27892e-23	4.20158e-26
Glyma.04G093100	7	0	7	0	0	0	0	21	7	21	0	0	7	0	7	0	7	0	0	7	0	7	7	7	14	7	7	7	0	7	140	5.3476e-28	1.40107e-23	1.3846e-23	4.53421e-26
Glyma.07G070400	0	0	0	0	8	0	0	16	0	16	0	0	0	0	0	0	16	8	0	0	0	0	0	0	8	16	16	16	0	0	120	6.32607e-28	1.65743e-23	1.63757e-23	5.26168e-26
Glyma.09G073700	0	0	0	0	15	0	0	10	10	10	0	0	0	0	0	0	5	5	0	0	0	15	5	10	15	10	10	0	0	0	120	6.32607e-28	1.65743e-23	1.63757e-23	5.26168e-26
Glyma.01G113800	15	0	1	0	9	8	11	9	11	9	0	0	6	1	2	0	12	1	0	2	1	7	7	1	13	11	4	2	0	6	137	6.30381e-28	1.6516e-23	1.63206e-23	5.26168e-26
Glyma.05G039000	10	0	10	0	10	0	0	10	10	10	0	0	0	0	10	0	10	0	0	0	0	0	10	10	0	10	10	0	0	0	120	6.32607e-28	1.65743e-23	1.63757e-23	5.26168e-26
Glyma.07G062900	12	0	0	0	0	0	0	24	6	24	0	0	0	0	0	0	6	0	0	0	0	0	0	0	6	24	12	6	0	0	120	6.32607e-28	1.65743e-23	1.63757e-23	5.26168e-26
Glyma.07G164600	30	0	0	0	11	0	0	36	13	36	0	0	47	0	3	0	26	0	0	4	0	10	7	0	33	16	3	1	0	47	229	6.28002e-28	1.64537e-23	1.62596e-23	5.26168e-26
Glyma.18G148700	21	0	1	0	11	0	0	10	18	10	0	2	24	1	10	0	19	0	0	5	0	12	11	3	18	20	10	5	0	26	185	6.94384e-28	1.81928e-23	1.79741e-23	5.75723e-26
Glyma.12G118300	22	0	0	0	11	0	0	11	11	11	0	11	11	0	11	0	11	0	0	0	0	11	11	11	22	11	11	11	0	22	176	7.07595e-28	1.8539e-23	1.83154e-23	5.84826e-26
Glyma.17G208400	15	0	6	0	6	0	0	15	9	15	0	6	9	6	3	0	18	0	0	3	0	12	3	3	15	15	12	3	0	15	159	9.60109e-28	2.51549e-23	2.48505e-23	7.91033e-26
Glyma.02G160400	8	0	0	0	10	0	12	18	10	18	0	0	6	0	4	0	10	0	0	2	0	8	8	0	14	12	2	0	0	6	136	1.03989e-27	2.7245e-23	2.69143e-23	8.54075e-26
Glyma.13G099600	0	0	0	0	0	0	0	14	14	14	0	0	0	7	14	0	0	0	0	7	0	14	7	0	14	14	0	0	0	0	119	1.04729e-27	2.74391e-23	2.7105e-23	8.57473e-26
Glyma.05G233900	10	0	0	0	10	0	0	10	10	10	0	10	10	10	10	10	10	10	0	10	0	0	10	10	10	10	10	10	0	20	170	1.40226e-27	3.67391e-23	3.62904e-23	1.14452e-25
Glyma.15G170300	22	0	4	0	2	0	0	2	22	2	0	0	22	8	18	0	2	10	0	0	0	12	10	2	22	16	16	4	0	22	174	1.84429e-27	4.83205e-23	4.77285e-23	1.50064e-25
Glyma.03G043200	15	0	5	0	10	0	0	10	10	10	5	5	0	0	5	0	15	5	0	5	0	10	5	0	10	5	15	10	0	10	145	2.14211e-27	5.61232e-23	5.54335e-23	1.73756e-25
Glyma.02G192600	18	0	0	0	12	0	18	12	12	12	0	12	0	12	0	0	0	0	0	0	0	12	0	12	18	6	6	0	0	12	150	2.16938e-27	5.68377e-23	5.61348e-23	1.74885e-25
Glyma.17G181200	18	0	2	0	3	0	0	16	5	16	0	4	8	0	2	0	31	1	0	2	0	18	5	3	7	13	8	0	0	12	150	2.16938e-27	5.68377e-23	5.61348e-23	1.74885e-25
Glyma.13G011100	27	0	0	0	0	0	0	0	9	0	0	0	0	0	0	0	36	0	0	0	0	0	9	0	18	18	0	0	0	0	117	2.87068e-27	7.52117e-23	7.42787e-23	2.30711e-25
Glyma.13G265700	14	0	14	0	7	0	0	14	14	14	0	0	14	0	7	0	14	0	0	0	0	7	7	7	14	14	7	0	0	14	154	3.39607e-27	8.89769e-23	8.78698e-23	2.72101e-25
Glyma.19G067200	22	0	0	0	6	0	0	8	22	8	0	2	26	0	4	0	22	0	0	4	0	8	20	4	24	18	16	0	0	28	186	3.41747e-27	8.95377e-23	8.84202e-23	2.72981e-25
Glyma.13G272000	12	0	8	0	12	0	0	12	12	12	0	8	12	0	4	0	12	4	0	12	0	12	0	8	12	12	12	12	0	20	168	3.67403e-27	9.62596e-23	9.50546e-23	2.92583e-25
Glyma.14G077500	4	0	0	0	12	0	0	12	12	12	0	4	0	4	0	0	12	0	0	12	0	12	4	12	8	12	0	0	0	4	128	3.72212e-27	9.75195e-23	9.6295e-23	2.95514e-25
Glyma.02G176800	18	0	0	0	0	0	9	12	18	12	0	0	9	0	3	0	12	0	0	0	0	15	12	0	15	15	0	0	0	9	141	4.38457e-27	1.14876e-22	1.13429e-22	3.47056e-25
Glyma.14G108400	16	0	0	0	16	0	0	16	16	16	0	8	16	0	16	0	8	0	0	0	0	16	8	8	16	16	8	0	0	24	176	6.05453e-27	1.58629e-22	1.56625e-22	4.77798e-25
Glyma.04G151000	15	0	0	0	9	0	0	12	18	12	0	6	12	0	9	0	15	0	0	3	0	9	15	3	15	15	12	0	0	18	162	7.11476e-27	1.86407e-22	1.84045e-22	5.5978e-25
Glyma.07G063300	0	0	0	0	0	0	0	36	15	36	0	6	0	0	6	0	12	0	0	0	0	0	9	6	9	3	0	0	0	6	132	7.69908e-27	2.01716e-22	1.99152e-22	6.0394e-25
Glyma.14G001500	15	0	0	0	0	0	0	0	20	0	0	0	0	0	0	0	10	0	0	0	0	0	0	15	20	10	20	5	0	0	115	7.86975e-27	2.06187e-22	2.03543e-22	6.11832e-25
Glyma.01G239000	15	0	0	0	0	0	15	10	0	10	0	0	0	0	0	0	20	0	0	0	0	0	5	0	15	15	10	0	0	0	115	7.86975e-27	2.06187e-22	2.03543e-22	6.11832e-25
Glyma.04G231351	5	0	5	0	0	0	0	15	15	15	0	0	0	0	10	0	5	0	0	0	0	0	5	5	15	15	0	5	0	0	115	7.86975e-27	2.06187e-22	2.03543e-22	6.11832e-25
Glyma.02G185900	17	0	0	0	8	0	13	17	17	17	0	1	5	0	1	0	1	0	0	0	0	5	1	1	14	16	3	0	0	6	131	1.26994e-26	3.32723e-22	3.28444e-22	9.84388e-25
Glyma.09G177600	12	0	0	0	12	0	0	8	12	8	0	4	12	8	12	4	8	0	0	4	0	12	12	12	12	8	12	0	0	16	156	1.33401e-26	3.49511e-22	3.44976e-22	1.02496e-24
Glyma.07G125300	12	0	0	0	8	0	0	12	12	12	0	4	12	8	8	0	12	0	0	0	0	20	12	0	16	12	12	0	0	16	156	1.33401e-26	3.49511e-22	3.44975e-22	1.02496e-24
Glyma.07G147000	4	0	0	0	4	0	0	16	16	16	0	0	16	8	16	0	12	0	0	0	0	4	4	8	20	20	4	4	0	16	156	1.33401e-26	3.49511e-22	3.44975e-22	1.02496e-24
Glyma.01G063700	8	0	0	0	8	8	8	16	16	16	0	0	8	12	4	0	8	0	0	0	0	8	0	0	8	8	8	0	0	8	136	1.45762e-26	3.81896e-22	3.76911e-22	1.1134e-24
Glyma.05G217051	16	0	0	0	8	0	0	8	8	8	0	0	8	8	8	0	8	0	0	0	0	8	8	0	16	16	16	0	0	8	136	1.45762e-26	3.81896e-22	3.76911e-22	1.1134e-24
Glyma.06G221300	27	0	0	0	9	0	0	12	15	12	0	0	24	0	12	0	18	0	0	3	0	12	12	3	12	15	12	0	0	24	174	1.56537e-26	4.10127e-22	4.04758e-22	1.19223e-24
Glyma.18G110500	7	0	0	0	7	0	0	21	7	21	0	0	7	7	7	0	0	7	0	0	0	0	0	7	7	7	7	21	0	7	133	1.76355e-26	4.6205e-22	4.55983e-22	1.33928e-24
Glyma.10G104100	24	0	0	0	12	0	0	14	18	14	0	0	14	0	4	0	12	0	0	2	0	6	10	0	22	10	2	0	0	14	150	2.41036e-26	6.31515e-22	6.23175e-22	1.81993e-24
Glyma.20G192300	12	2	0	0	12	0	0	12	12	12	0	2	12	0	8	0	16	2	0	0	2	8	12	6	16	10	6	2	0	14	150	2.41036e-26	6.31515e-22	6.23175e-22	1.81993e-24
Glyma.10G070100	10	0	5	0	10	0	0	10	5	10	0	5	5	5	5	0	10	5	0	0	0	10	10	10	10	10	10	5	0	10	140	2.55278e-26	6.68829e-22	6.59945e-22	1.91642e-24
Glyma.12G155800	15	0	0	0	10	0	0	15	15	15	0	0	10	0	5	0	10	0	0	0	0	15	10	0	15	10	5	0	0	10	140	2.55278e-26	6.68829e-22	6.59945e-22	1.91642e-24
Glyma.20G074200	24	0	0	0	2	0	0	0	22	0	0	2	2	0	0	0	4	0	0	6	0	4	12	4	20	20	6	0	0	4	124	2.77665e-26	7.27482e-22	7.17764e-22	2.0726e-24
Glyma.20G074333	14	2	0	0	14	0	0	4	14	4	0	0	4	0	0	0	14	0	0	2	0	4	14	0	14	12	12	0	0	4	124	2.77665e-26	7.27482e-22	7.17764e-22	2.0726e-24
Glyma.06G261400	12	0	12	0	4	0	0	48	28	48	4	0	64	0	0	0	60	0	4	0	0	0	0	4	16	24	0	0	0	68	260	2.93469e-26	7.68889e-22	7.58589e-22	2.18435e-24
Glyma.13G030700	8	0	8	0	0	0	0	0	12	0	0	0	0	8	0	0	8	4	0	4	0	8	8	8	12	12	12	0	0	0	112	3.5731e-26	9.36153e-22	9.23468e-22	2.62964e-24
Glyma.13G134400	16	0	0	0	0	0	0	16	0	16	0	0	0	0	0	0	16	0	0	0	4	16	0	12	16	0	0	0	0	0	112	3.5731e-26	9.36153e-22	9.23468e-22	2.62964e-24
Glyma.18G300300	14	0	0	0	0	0	0	0	0	0	0	0	0	0	0	0	21	0	0	0	0	0	14	28	14	14	0	7	0	0	112	3.5731e-26	9.36153e-22	9.23468e-22	2.62964e-24
Glyma.19G087000	21	0	0	0	21	0	0	21	0	21	0	0	42	0	21	0	21	0	0	0	0	0	21	0	21	21	21	0	0	42	210	3.5731e-26	9.36153e-22	9.23468e-22	2.62964e-24
Glyma.03G038900	4	0	2	0	8	0	0	20	6	20	4	2	6	0	6	0	20	2	0	2	0	4	6	6	20	14	4	0	0	12	144	4.17299e-26	1.09332e-21	1.07826e-21	3.02023e-24
Glyma.06G258900	2	0	0	0	14	0	0	2	12	2	0	6	6	0	6	0	22	10	0	8	0	16	2	14	0	18	2	14	0	12	144	4.17299e-26	1.09332e-21	1.07826e-21	3.02023e-24
Glyma.11G175800	9	0	0	0	6	0	0	21	18	21	0	0	12	0	0	0	15	0	0	0	0	6	9	0	15	12	6	6	0	12	144	4.17299e-26	1.09332e-21	1.07826e-21	3.02023e-24
Glyma.15G122200	12	0	0	0	0	0	0	8	8	8	0	0	12	0	8	0	16	0	0	12	4	12	8	8	12	12	8	8	0	12	144	4.17299e-26	1.09332e-21	1.07826e-21	3.02023e-24
Glyma.18G142500	18	0	0	0	15	0	0	9	12	9	0	0	12	0	6	0	15	0	0	0	0	12	9	3	15	12	6	3	0	12	144	4.17299e-26	1.09332e-21	1.07826e-21	3.02023e-24
Glyma.09G151400	0	0	0	0	12	0	0	24	24	24	0	0	12	0	0	0	12	0	0	0	0	6	6	0	18	6	6	6	0	12	144	4.17299e-26	1.09332e-21	1.07826e-21	3.02023e-24
Glyma.18G148500	24	0	1	0	13	0	0	3	22	3	0	0	27	2	5	0	24	0	0	1	0	14	11	3	22	21	7	2	0	27	178	5.28384e-26	1.38437e-21	1.36524e-21	3.81368e-24
Glyma.04G142700	6	0	0	0	4	0	0	6	24	6	0	0	6	2	6	0	24	0	0	6	0	6	8	2	18	6	2	2	0	6	128	5.69847e-26	1.493e-21	1.47231e-21	4.10165e-24
Glyma.13G042900	10	0	5	0	5	0	0	10	5	10	0	0	5	5	5	5	10	5	0	5	0	10	5	5	5	5	5	10	0	5	125	6.64755e-26	1.74166e-21	1.71746e-21	4.77167e-24
Glyma.04G105500	17	0	0	0	2	0	0	13	19	13	0	1	14	1	9	0	16	2	0	2	1	8	7	2	17	17	3	1	0	15	150	7.79115e-26	2.04128e-21	2.01277e-21	5.56208e-24
Glyma.06G217400	12	0	0	0	6	0	0	15	15	15	0	0	15	3	3	0	18	3	0	3	0	9	9	0	15	15	9	0	0	15	150	7.79115e-26	2.04128e-21	2.01277e-21	5.56208e-24
Glyma.18G139400	15	0	0	0	15	0	0	15	15	15	0	12	18	3	9	0	15	0	0	3	3	15	15	9	12	12	9	3	0	30	183	1.02988e-25	2.69828e-21	2.66048e-21	7.33227e-24
Glyma.03G016600	12	0	3	0	6	0	0	9	12	9	0	6	12	0	9	0	12	3	3	6	0	12	9	6	12	12	12	9	0	18	156	1.29438e-25	3.39129e-21	3.34365e-21	9.19048e-24
Glyma.15G186500	11	0	0	0	11	0	0	11	11	11	0	11	11	0	11	0	11	0	0	11	0	11	11	11	11	22	11	0	0	22	165	1.35816e-25	3.55838e-21	3.50813e-21	9.59132e-24
Glyma.03G055900	0	0	11	0	0	0	0	0	33	0	0	0	22	0	0	0	33	0	11	0	0	0	0	0	44	0	33	0	0	22	165	1.35816e-25	3.55838e-21	3.50813e-21	9.59132e-24
Glyma.03G066600	20	0	0	0	14	0	0	16	16	16	0	6	22	0	6	0	20	0	0	0	0	10	8	2	16	16	8	10	0	28	178	1.44996e-25	3.79889e-21	3.74509e-21	1.02121e-23
Glyma.07G088100	12	0	4	0	12	0	0	12	12	12	0	8	12	4	4	0	12	0	0	0	0	12	8	8	16	12	12	8	0	20	160	1.71643e-25	4.49704e-21	4.43302e-21	1.20242e-23
Glyma.13G272100	10	0	10	0	10	0	0	10	10	10	0	10	10	0	0	0	10	10	0	10	0	10	10	10	10	10	10	10	0	20	160	1.71643e-25	4.49704e-21	4.43302e-21	1.20242e-23
Glyma.03G039500	0	0	0	0	8	0	0	16	2	16	0	2	2	0	0	0	20	2	0	0	0	2	6	8	18	18	4	0	0	4	120	2.07158e-25	5.42753e-21	5.34964e-21	1.43966e-23
Glyma.03G054100	0	0	0	0	0	0	0	0	8	0	4	0	0	0	0	0	24	0	0	0	0	0	0	0	32	24	20	12	0	4	120	2.07158e-25	5.42753e-21	5.34964e-21	1.43966e-23
Glyma.02G310900	12	0	0	0	8	0	0	0	12	0	0	4	0	0	0	0	16	4	0	0	0	12	12	4	12	16	8	4	0	4	120	2.07158e-25	5.42753e-21	5.34964e-21	1.43966e-23
Glyma.11G176301	13	0	2	0	10	0	0	14	13	14	0	1	12	0	4	0	13	1	0	1	0	11	7	1	16	14	8	1	0	13	143	2.27172e-25	5.9519e-21	5.86626e-21	1.57458e-23
Glyma.01G132400	15	0	0	0	15	0	3	15	15	15	0	0	3	0	9	0	15	0	0	0	0	3	0	0	3	3	3	3	0	3	117	2.31025e-25	6.05284e-21	5.96552e-21	1.59706e-23
Glyma.08G126700	9	0	0	0	9	0	0	9	0	9	0	0	0	0	0	9	9	0	0	0	0	9	9	0	9	9	9	9	0	0	108	2.68778e-25	7.04199e-21	6.93985e-21	1.84829e-23
Glyma.19G224500	12	0	0	0	0	0	0	0	0	0	0	0	0	0	0	0	12	12	0	0	0	0	12	12	12	12	12	12	0	0	108	2.68778e-25	7.04199e-21	6.93985e-21	1.84829e-23
Glyma.07G096100	10	0	0	0	0	0	0	10	20	10	0	0	10	0	10	0	10	0	0	15	0	10	10	0	10	10	10	0	0	10	135	3.03589e-25	7.95403e-21	7.83837e-21	2.08221e-23
Glyma.17G172400	8	0	0	0	1	0	0	18	9	18	0	4	3	1	1	0	23	2	0	1	0	2	5	2	9	16	9	2	0	7	127	3.5248e-25	9.23496e-21	9.10032e-21	2.41122e-23
Glyma.01G114050	12	0	1	0	3	7	7	10	12	10	0	0	3	1	5	0	11	0	0	1	0	6	6	2	9	6	5	2	0	3	116	3.82148e-25	1.00123e-20	9.86591e-21	2.6067e-23
Glyma.02G162500	33	0	0	0	3	0	6	12	6	12	0	0	9	0	0	0	9	0	0	0	0	6	6	0	27	9	3	0	0	9	132	3.83045e-25	1.00358e-20	9.8887e-21	2.6067e-23
Glyma.04G157900	30	0	0	0	15	0	0	30	30	30	0	0	45	0	0	0	30	0	0	0	0	0	0	0	30	15	0	0	0	45	210	5.01289e-25	1.31338e-20	1.29408e-20	3.40253e-23
Glyma.19G070800	21	6	0	0	3	0	0	15	18	15	0	0	39	0	9	0	39	0	0	0	0	3	18	0	27	21	3	0	0	39	198	5.25592e-25	1.37705e-20	1.35676e-20	3.55827e-23
Glyma.04G136400	14	0	0	0	0	0	0	7	21	7	0	0	7	0	0	0	21	0	0	0	0	0	21	0	21	7	7	0	0	7	126	5.80584e-25	1.52113e-20	1.49866e-20	3.92044e-23
Glyma.18G159000	19	0	1	0	11	0	0	7	18	7	0	1	22	4	7	0	17	0	0	1	0	6	15	3	18	17	8	5	0	23	164	6.28824e-25	1.64752e-20	1.62312e-20	4.23527e-23
Glyma.03G031900	12	0	0	0	6	0	0	6	12	6	0	0	2	0	8	0	14	2	0	0	0	2	4	6	10	10	6	8	0	2	112	6.86935e-25	1.79977e-20	1.77305e-20	4.6148e-23
Glyma.17G212500	26	0	1	0	4	0	0	19	9	19	0	1	13	0	3	0	9	0	0	4	0	4	6	6	28	4	1	0	0	14	143	7.39726e-25	1.93808e-20	1.90923e-20	4.95673e-23
Glyma.02G051900	8	0	0	0	8	0	24	8	8	8	0	0	8	0	8	0	8	0	0	8	0	8	0	8	8	8	8	0	0	8	128	7.82453e-25	2.05003e-20	2.01943e-20	5.22966e-23
Glyma.16G005500	12	0	6	0	12	0	0	12	12	12	0	0	12	0	6	0	12	0	0	0	0	12	12	6	12	12	0	0	0	12	138	7.99357e-25	2.09431e-20	2.0629e-20	5.31552e-23
Glyma.04G142100	10	0	0	0	8	0	0	6	26	6	0	2	10	0	6	0	28	2	0	0	0	4	14	0	20	6	2	0	0	12	138	7.99357e-25	2.09431e-20	2.0629e-20	5.31552e-23
Glyma.09G209501	3	0	0	0	12	0	0	12	12	12	0	9	12	12	6	0	12	0	0	3	0	12	3	12	12	12	12	12	0	21	159	8.15656e-25	2.13702e-20	2.1048e-20	5.39651e-23
Glyma.16G202400	10	0	5	0	0	0	0	15	20	15	0	0	5	5	0	0	10	0	0	0	0	10	0	5	5	10	5	5	0	5	120	8.15656e-25	2.13702e-20	2.1048e-20	5.39651e-23
Glyma.12G088300	5	5	5	5	10	0	0	5	10	5	0	5	10	5	5	5	5	10	5	5	5	10	5	10	10	5	5	5	0	15	145	8.90965e-25	2.33433e-20	2.29896e-20	5.86515e-23
Glyma.16G182400	10	0	0	0	0	0	0	10	10	10	0	5	10	10	5	0	10	0	0	10	0	10	10	10	10	10	10	10	0	15	145	8.90965e-25	2.33433e-20	2.29896e-20	5.86515e-23
Glyma.19G230500	10	0	0	0	0	0	0	0	15	0	0	0	0	0	0	0	15	0	0	0	0	15	15	5	10	10	10	0	0	0	105	1.22136e-24	3.19996e-20	3.15123e-20	7.9999e-23
Glyma.09G067200	0	0	0	0	14	0	0	14	21	14	0	0	0	7	0	0	0	0	0	0	0	14	0	7	14	0	0	0	0	0	105	1.22136e-24	3.19996e-20	3.15123e-20	7.9999e-23
Glyma.14G014100	4	0	8	0	8	0	0	8	8	8	0	4	0	0	0	8	0	4	0	4	4	8	8	8	8	8	8	4	0	4	116	1.54571e-24	4.04976e-20	3.98762e-20	1.0049e-22
Glyma.09G102800	0	0	0	0	16	0	0	32	0	32	0	0	4	0	0	0	0	0	0	0	0	16	0	0	12	4	4	0	0	4	116	1.54571e-24	4.04976e-20	3.98762e-20	1.0049e-22
Glyma.01G012200	12	0	4	0	20	0	20	4	4	4	0	0	4	0	0	0	16	0	0	0	0	8	8	4	8	4	0	0	0	4	116	1.54571e-24	4.04976e-20	3.98762e-20	1.0049e-22
Glyma.03G109200	0	4	0	0	0	0	0	0	0	0	0	0	0	0	0	0	52	8	0	0	0	0	0	4	36	0	0	0	0	0	104	2.02316e-24	5.30068e-20	5.21895e-20	1.30881e-22
Glyma.01G005500	0	0	0	0	0	13	13	13	0	13	0	0	0	13	0	0	13	0	0	0	0	13	0	0	13	0	0	0	0	0	104	2.02316e-24	5.30068e-20	5.21895e-20	1.30881e-22
Glyma.15G202200	10	0	0	0	32	0	0	10	38	10	0	4	50	0	20	0	38	0	0	2	0	4	0	6	18	26	10	0	0	54	224	2.06772e-24	5.41743e-20	5.33369e-20	1.33434e-22
Glyma.07G167700	14	0	0	0	8	0	0	18	12	18	2	0	16	0	6	0	12	0	0	4	0	14	6	2	16	12	8	0	0	18	150	2.337e-24	6.12294e-20	6.02806e-20	1.50441e-22
Glyma.16G090101	25	0	0	0	9	0	0	11	21	11	0	0	28	1	7	0	26	0	0	0	0	5	6	0	25	20	5	0	0	28	172	2.3778e-24	6.22982e-20	6.13305e-20	1.52692e-22
Glyma.15G224900	16	0	0	0	16	0	0	12	24	12	0	4	30	2	14	0	26	0	0	2	0	10	0	6	22	12	4	6	0	34	184	3.01287e-24	7.89372e-20	7.7708e-20	1.93001e-22
Glyma.19G065000	15	0	0	0	6	0	0	21	22	21	0	2	40	0	6	0	27	0	0	3	0	11	9	0	21	23	14	1	0	42	200	3.0961e-24	8.11178e-20	7.98515e-20	1.97848e-22
Glyma.13G003000	15	0	0	0	0	0	0	0	21	0	0	6	0	0	0	0	18	9	0	0	0	15	9	12	3	3	15	0	0	6	120	3.11832e-24	8.17e-20	8.04214e-20	1.98783e-22
Glyma.09G099200	7	0	0	0	14	0	0	21	7	21	0	7	7	7	0	0	7	0	0	0	0	21	0	0	21	7	7	0	0	14	140	3.20117e-24	8.38706e-20	8.25549e-20	2.03569e-22
Glyma.16G107700	6	0	0	0	12	0	0	6	12	6	0	0	12	0	12	0	15	0	0	9	0	6	6	3	15	18	6	3	0	12	135	3.49247e-24	9.15026e-20	9.00602e-20	2.21021e-22
Glyma.04G201000	9	0	0	0	9	0	0	9	9	9	0	6	6	6	6	0	9	0	0	3	3	9	9	9	9	9	9	9	0	12	135	3.49247e-24	9.15026e-20	9.00602e-20	2.21021e-22
Glyma.07G062800	8	2	0	0	2	0	0	20	6	20	0	2	2	0	2	0	6	6	0	2	0	2	2	4	6	12	8	6	0	4	114	4.22239e-24	1.10627e-19	1.08879e-19	2.6657e-22
Glyma.07G201200	12	0	0	0	4	0	0	12	12	12	0	4	12	4	8	0	8	0	0	8	0	12	4	8	12	12	8	8	0	16	144	4.53702e-24	1.1887e-19	1.16973e-19	2.83699e-22
Glyma.13G007400	16	0	0	0	0	0	0	8	24	8	0	0	16	0	0	0	24	0	0	0	0	8	16	0	16	8	16	0	0	16	144	4.53702e-24	1.1887e-19	1.16973e-19	2.83699e-22
Glyma.15G237900	8	0	0	0	8	0	0	16	16	16	0	0	16	0	0	0	24	0	0	0	0	24	0	8	16	8	0	0	0	16	144	4.53702e-24	1.1887e-19	1.16973e-19	2.83699e-22
Glyma.18G150600	18	0	2	0	12	0	0	2	18	2	0	0	16	0	14	0	18	0	0	2	0	4	10	2	18	12	10	0	0	16	144	4.53702e-24	1.1887e-19	1.16973e-19	2.83699e-22
Glyma.04G221000	22	0	0	0	11	0	0	11	0	11	0	0	11	0	0	0	11	0	0	11	0	11	11	0	11	11	11	0	0	11	132	4.57239e-24	1.19797e-19	1.17881e-19	2.8523e-22
Glyma.05G203500	10	2	8	2	8	0	0	6	0	6	0	0	0	0	0	0	10	0	0	4	0	8	6	6	10	6	10	0	0	0	102	5.55218e-24	1.45467e-19	1.43124e-19	3.43894e-22
Glyma.17G258000	0	0	0	0	12	0	0	0	12	0	0	0	0	0	0	6	12	0	0	0	0	12	6	6	12	12	12	0	0	0	102	5.55218e-24	1.45467e-19	1.43124e-19	3.43894e-22
Glyma.09G062900	0	0	0	0	0	0	0	0	0	0	0	0	0	0	0	0	17	17	0	0	0	0	0	17	0	17	17	17	0	0	102	5.55218e-24	1.45467e-19	1.43124e-19	3.43894e-22
Glyma.05G106500	8	0	0	0	4	0	0	10	8	10	0	0	8	0	8	0	18	0	2	0	0	6	4	4	12	14	10	6	0	8	124	5.72467e-24	1.49986e-19	1.47565e-19	3.53741e-22
Glyma.06G221800	16	0	0	0	11	0	0	17	14	17	0	1	15	1	4	0	16	0	0	1	0	7	9	0	15	12	3	0	0	16	143	7.36518e-24	1.92968e-19	1.89845e-19	4.54042e-22
Glyma.15G265300	9	0	9	0	0	0	0	9	9	9	0	0	9	9	0	0	9	0	0	9	0	0	9	9	9	9	9	9	0	9	126	7.51638e-24	1.96929e-19	1.93712e-19	4.59042e-22
Glyma.17G188800	15	0	0	0	5	0	0	13	7	13	0	2	9	0	3	0	21	0	0	0	0	10	8	1	15	12	7	1	0	11	131	7.48438e-24	1.96091e-19	1.9291e-19	4.59042e-22
Glyma.03G035400	9	0	6	0	9	0	0	9	9	9	0	9	0	0	9	0	9	0	0	3	0	9	9	9	9	9	9	0	0	9	126	7.51638e-24	1.96929e-19	1.93712e-19	4.59042e-22
Glyma.04G085000	9	0	6	0	9	0	0	9	9	9	0	3	6	0	9	0	9	6	0	3	0	9	6	6	9	9	3	6	0	9	126	7.51638e-24	1.96929e-19	1.93712e-19	4.59042e-22
Glyma.18G254500	4	0	4	0	12	0	0	22	20	22	2	12	26	0	12	2	22	10	0	8	0	12	6	4	8	16	10	0	0	40	194	7.70686e-24	2.0192e-19	1.98614e-19	4.69581e-22
Glyma.15G213400	7	0	0	0	7	0	0	7	14	7	0	0	21	0	7	0	14	0	0	0	0	7	7	0	7	63	7	0	0	21	154	8.83424e-24	2.31457e-19	2.27658e-19	5.37023e-22
Glyma.01G119400	7	0	0	0	6	4	12	2	4	2	0	0	0	0	5	0	16	2	0	0	0	2	5	2	15	11	6	0	0	0	101	9.19834e-24	2.40997e-19	2.37032e-19	5.57863e-22
Glyma.19G054500	20	0	0	0	5	0	0	5	10	5	0	0	15	0	5	0	15	0	0	10	0	10	5	5	15	15	15	0	0	15	140	1.01425e-23	2.65735e-19	2.61343e-19	6.12292e-22
Glyma.04G226700	10	0	0	0	10	0	0	5	10	5	0	5	10	5	10	0	10	0	0	5	0	10	10	10	10	10	10	10	0	15	140	1.01425e-23	2.65735e-19	2.61343e-19	6.12292e-22
Glyma.06G274300	8	0	0	0	8	0	0	12	12	12	0	4	0	4	8	0	0	0	0	0	0	8	12	0	12	8	8	0	0	4	112	1.15345e-23	3.02204e-19	2.97198e-19	6.94722e-22
Glyma.20G187400	9	0	0	0	3	0	0	6	6	6	0	0	6	0	6	0	15	15	0	3	0	6	0	3	9	15	12	3	0	6	117	1.3981e-23	3.66303e-19	3.60221e-19	8.40145e-22
Glyma.06G220900	18	0	0	0	3	0	0	18	18	18	0	0	21	0	3	0	18	0	0	0	0	18	9	0	15	15	0	0	0	21	153	1.42145e-23	3.7242e-19	3.66208e-19	8.50274e-22
Glyma.19G061100	17	0	1	0	1	0	0	2	22	2	0	0	21	1	7	0	21	4	0	0	0	10	5	2	27	16	9	6	0	21	153	1.42145e-23	3.7242e-19	3.66208e-19	8.50274e-22
Glyma.18G154800	19	0	0	0	11	0	0	7	20	7	0	3	24	2	2	0	26	0	0	0	0	7	14	2	21	18	7	3	0	27	166	1.44251e-23	3.77937e-19	3.71618e-19	8.60903e-22
Glyma.06G251900	18	1	2	0	15	0	0	28	29	28	12	2	43	2	7	2	25	6	2	4	2	6	5	2	18	12	4	4	3	57	225	1.45987e-23	3.82486e-19	3.76078e-19	8.69287e-22
Glyma.15G249200	12	0	0	0	2	0	0	14	14	14	0	0	12	0	4	0	10	0	0	4	0	10	8	8	14	10	6	2	0	12	132	1.52397e-23	3.9928e-19	3.92499e-19	8.95247e-22
Glyma.17G153900	10	0	0	0	8	0	0	10	8	10	0	0	0	2	0	0	8	2	0	0	0	6	6	4	8	8	8	2	0	0	100	1.52397e-23	3.9928e-19	3.92499e-19	8.95247e-22
Glyma.18G204900	20	0	0	0	0	0	0	12	12	12	0	12	0	0	12	0	8	8	0	0	0	12	0	12	16	0	0	8	0	12	132	1.52397e-23	3.9928e-19	3.92499e-19	8.95247e-22
Glyma.07G069800	0	0	0	0	0	0	0	20	0	20	0	0	0	0	0	0	0	0	0	0	0	0	0	0	0	20	20	20	0	0	100	1.52397e-23	3.9928e-19	3.92499e-19	8.95247e-22
Glyma.01G117900	10	0	0	0	10	10	10	0	0	0	0	0	0	0	10	0	10	0	0	0	0	10	0	0	10	10	10	0	0	0	100	1.52397e-23	3.9928e-19	3.92499e-19	8.95247e-22
Glyma.02G238300	12	0	0	0	0	0	0	8	0	8	0	0	0	0	8	0	12	4	0	0	0	0	4	16	8	12	8	0	0	0	100	1.52397e-23	3.9928e-19	3.92499e-19	8.95247e-22
Glyma.13G197400	9	0	0	0	15	0	0	9	15	9	0	9	15	6	15	6	9	0	0	9	0	9	9	9	9	9	9	3	0	24	159	1.87433e-23	4.91074e-19	4.82715e-19	1.0986e-21
Glyma.11G196900	7	0	0	0	7	0	0	7	14	7	0	0	7	0	7	0	14	0	0	0	0	7	7	7	7	14	14	0	0	7	119	1.90737e-23	4.99731e-19	4.91186e-19	1.11299e-21
Glyma.01G032100	21	7	0	0	7	7	7	7	7	7	0	0	7	0	0	0	7	0	0	7	0	7	0	7	7	7	7	0	0	7	119	1.90737e-23	4.99731e-19	4.91186e-19	1.11299e-21
Glyma.08G173900	9	0	6	0	3	0	0	12	9	12	0	0	3	3	6	0	6	0	0	9	0	9	9	6	3	3	3	0	0	3	108	2.14359e-23	5.61621e-19	5.51974e-19	1.24528e-21
Glyma.04G103000	18	0	0	0	0	0	0	0	18	0	0	3	0	0	15	0	3	0	0	0	0	15	6	9	15	3	6	0	0	3	108	2.14359e-23	5.61621e-19	5.51974e-19	1.24528e-21
Glyma.19G238300	11	0	0	0	11	0	0	11	11	11	0	11	11	0	11	0	11	0	0	11	0	11	11	0	11	11	11	11	0	22	154	2.52502e-23	6.61555e-19	6.50167e-19	1.46362e-21
Glyma.18G153500	21	0	0	0	6	0	0	20	12	20	0	1	18	0	6	0	14	0	0	0	0	8	6	3	13	11	7	0	0	19	147	2.93981e-23	7.7023e-19	7.56942e-19	1.70029e-21
Glyma.01G097100	14	0	0	0	10	6	8	2	14	2	0	0	4	0	4	0	12	0	0	0	0	0	10	0	12	10	6	0	0	4	110	3.15101e-23	8.25565e-19	8.11291e-19	1.81843e-21
Glyma.20G050300	12	0	0	0	3	0	0	12	9	12	0	0	9	0	3	0	21	0	0	3	0	3	3	0	36	6	0	0	0	9	123	3.32571e-23	8.71337e-19	8.56238e-19	1.91503e-21
Glyma.01G099800	14	0	0	0	0	7	7	7	14	7	0	0	0	0	0	0	7	0	0	0	0	7	0	0	14	14	0	0	0	0	98	4.18383e-23	1.09616e-18	1.07708e-18	2.3986e-21
Glyma.09G041200	16	0	12	0	16	0	0	0	16	0	0	8	0	0	0	8	16	0	0	0	4	0	16	0	16	0	0	0	0	8	120	4.18383e-23	1.09616e-18	1.07708e-18	2.3986e-21
Glyma.12G146700	15	0	0	0	12	0	0	15	15	15	0	3	18	3	0	0	15	0	0	3	0	12	9	3	15	15	3	0	0	21	150	5.91071e-23	1.54861e-18	1.52159e-18	3.38124e-21
Glyma.15G213600	7	0	0	0	21	0	0	7	35	7	0	7	63	7	21	0	49	0	0	7	0	0	7	0	21	42	14	0	0	70	245	6.19673e-23	1.62354e-18	1.59516e-18	3.53713e-21
Glyma.01G113400	10	0	0	0	2	8	6	12	12	12	0	2	4	0	2	0	12	0	0	4	0	2	8	0	12	6	4	2	0	6	114	6.26667e-23	1.64187e-18	1.61304e-18	3.56153e-21
Glyma.01G129600	10	0	4	0	4	0	6	8	10	8	0	0	6	0	6	0	10	0	0	0	0	6	6	6	14	6	6	4	0	6	114	6.26667e-23	1.64187e-18	1.61304e-18	3.56153e-21
Glyma.06G230300	6	0	0	0	12	0	0	18	18	18	0	3	9	0	6	0	6	0	0	3	0	6	3	3	18	6	6	0	0	12	129	6.64106e-23	1.73996e-18	1.70934e-18	3.76614e-21
Glyma.16G005600	12	0	0	0	12	0	0	12	12	12	0	12	12	0	12	0	12	0	0	0	12	12	12	12	12	12	0	0	0	24	156	7.66961e-23	2.00944e-18	1.97393e-18	4.33068e-21
Glyma.18G132500	21	0	3	0	18	0	0	3	15	3	0	6	18	0	6	0	18	0	0	3	0	15	6	6	21	12	6	0	0	24	156	7.66961e-23	2.00944e-18	1.97393e-18	4.33068e-21
Glyma.17G194900	14	0	0	0	2	0	0	14	3	14	0	1	6	0	2	0	17	0	0	0	0	11	5	2	13	13	6	0	0	7	116	8.51275e-23	2.23034e-18	2.19084e-18	4.79643e-21
Glyma.17G216450	16	0	0	0	0	0	0	20	0	20	0	4	0	0	0	0	16	0	0	0	0	16	0	0	16	4	0	0	0	4	108	8.60816e-23	2.25534e-18	2.21522e-18	4.82942e-21
Glyma.06G027500	8	0	4	0	8	0	0	8	4	8	0	0	4	4	8	0	8	0	0	4	0	8	4	8	8	8	8	0	0	4	108	8.60816e-23	2.25534e-18	2.21522e-18	4.82942e-21
Glyma.09G122801	12	0	0	0	12	0	0	18	15	18	3	6	18	0	6	0	15	0	0	3	0	12	9	0	15	12	6	9	0	27	162	9.25223e-23	2.42408e-18	2.38088e-18	5.17967e-21
Glyma.09G004700	8	0	0	0	12	0	0	12	16	12	0	0	12	0	12	0	16	0	0	0	0	16	0	0	8	12	4	0	0	12	128	1.08439e-22	2.84111e-18	2.79015e-18	6.03209e-21
Glyma.13G187600	8	0	12	0	0	0	0	8	8	8	4	0	8	8	8	0	8	8	0	8	4	8	8	8	8	8	0	0	0	12	128	1.08439e-22	2.84111e-18	2.79015e-18	6.03209e-21
Glyma.15G273700	8	0	4	0	8	0	0	8	8	8	0	4	8	8	4	4	8	4	0	0	0	8	8	8	8	8	8	8	0	12	128	1.08439e-22	2.84111e-18	2.79015e-18	6.03209e-21
Glyma.18G162820	11	0	1	0	7	0	0	25	7	25	1	1	16	1	4	0	13	0	0	4	1	8	5	3	10	8	5	3	1	18	142	1.09225e-22	2.86169e-18	2.81024e-18	6.0629e-21
Glyma.10G147300	9	0	0	0	3	0	0	15	9	15	0	0	15	3	15	0	6	9	0	3	0	15	6	6	12	6	3	0	0	15	135	1.14883e-22	3.00995e-18	2.95492e-18	6.27072e-21
Glyma.11G154800	12	0	0	0	0	0	0	12	12	12	0	0	0	0	0	0	12	0	0	0	0	12	12	0	12	0	0	0	0	0	96	1.14883e-22	3.00995e-18	2.95492e-18	6.27072e-21
Glyma.13G172200	9	0	0	0	0	0	0	3	9	3	0	0	0	3	6	0	9	0	0	6	0	6	6	6	9	9	6	6	0	0	96	1.14883e-22	3.00995e-18	2.95492e-18	6.27072e-21
Glyma.15G182600	10	0	0	0	10	0	0	10	10	10	0	5	10	0	10	0	10	5	0	5	0	10	10	5	10	10	10	0	0	15	135	1.14883e-22	3.00995e-18	2.95492e-18	6.27072e-21
Glyma.17G194600	12	0	0	0	0	0	0	12	0	12	0	0	0	0	0	0	15	3	0	0	0	3	3	3	12	12	9	0	0	0	96	1.14883e-22	3.00995e-18	2.95492e-18	6.27072e-21
Glyma.18G164100	14	0	0	0	6	0	0	19	10	19	0	0	10	0	2	0	15	0	0	0	0	7	6	0	11	8	4	1	1	10	123	1.14448e-22	2.99854e-18	2.94452e-18	6.27072e-21
Glyma.05G200800	12	0	12	0	0	0	0	0	12	0	0	0	0	0	12	0	0	0	0	12	0	0	12	0	12	0	12	0	0	0	96	1.14883e-22	3.00995e-18	2.95492e-18	6.27072e-21
Glyma.06G285000	6	0	0	0	6	0	0	6	6	6	0	0	0	6	6	0	12	0	0	6	0	6	6	6	6	6	6	0	0	0	96	1.14883e-22	3.00995e-18	2.95492e-18	6.27072e-21
Glyma.16G090000	20	0	0	0	12	0	0	4	16	4	0	0	20	0	2	0	20	0	0	4	0	0	12	0	20	14	14	4	0	20	146	1.37895e-22	3.61284e-18	3.54665e-18	7.5111e-21
Glyma.10G113900	12	0	1	0	8	0	0	13	12	13	0	0	7	0	4	0	15	0	0	1	0	3	3	3	13	10	4	0	0	7	115	1.40141e-22	3.67171e-18	3.6043e-18	7.61765e-21
Glyma.15G198801	5	0	0	0	30	0	0	5	50	5	0	5	55	0	25	0	10	5	0	0	0	30	5	20	15	10	10	0	0	60	225	1.45938e-22	3.82359e-18	3.75324e-18	7.91633e-21
Glyma.18G245500	15	0	0	0	3	0	0	18	3	18	0	6	3	3	9	0	3	0	0	0	0	3	9	3	6	12	9	6	0	9	120	1.47025e-22	3.85206e-18	3.78105e-18	7.9588e-21
Glyma.18G197100	14	0	0	0	12	0	0	14	14	14	0	2	12	4	8	0	14	0	0	0	0	12	8	0	14	0	0	4	0	14	132	1.5794e-22	4.13802e-18	4.06158e-18	8.53201e-21
Glyma.19G068600	21	0	1	0	5	0	0	4	17	4	0	4	26	0	6	0	23	2	0	4	0	10	15	2	21	19	8	5	0	30	167	1.65767e-22	4.34309e-18	4.26269e-18	8.9364e-21
Glyma.02G163300	10	0	0	0	8	0	10	14	12	14	0	0	10	0	0	0	10	0	0	0	0	10	8	0	10	8	6	2	0	10	122	1.87493e-22	4.91232e-18	4.8212e-18	1.00869e-20
Glyma.19G145950	15	0	0	0	15	0	0	0	15	0	0	0	0	10	0	5	0	0	0	0	0	0	10	15	10	0	0	0	0	0	95	1.90385e-22	4.98809e-18	4.89538e-18	1.02215e-20
Glyma.06G217500	12	0	0	0	8	0	0	18	10	18	0	2	14	0	6	0	16	0	0	0	0	8	12	2	12	12	2	0	0	16	136	2.17454e-22	5.6973e-18	5.59096e-18	1.16271e-20
Glyma.20G002900	8	0	8	0	8	0	0	8	8	8	0	8	8	8	8	0	8	8	0	0	8	8	8	8	8	8	8	0	0	16	136	2.17454e-22	5.6973e-18	5.59096e-18	1.16271e-20
Glyma.09G094600	6	0	0	0	12	0	0	18	6	18	0	0	6	3	0	0	6	0	0	0	0	15	3	0	15	6	3	0	0	6	111	2.80802e-22	7.357e-18	7.21913e-18	1.49533e-20
Glyma.17G193800	20	0	0	0	3	0	0	16	5	16	0	0	6	0	1	0	9	0	0	0	0	3	4	1	15	13	4	1	0	6	111	2.80802e-22	7.357e-18	7.21913e-18	1.49533e-20
Glyma.15G234500	8	0	0	0	8	0	0	8	4	8	0	4	4	0	8	0	12	8	0	0	0	24	0	0	8	8	8	4	0	8	116	3.05405e-22	8.00162e-18	7.85136e-18	1.62305e-20
Glyma.15G209600	12	0	0	0	9	0	0	9	18	9	0	3	21	3	9	0	12	0	0	3	3	12	6	3	12	15	9	9	0	24	153	3.12834e-22	8.19624e-18	8.04201e-18	1.65916e-20
Glyma.17G193650	10	0	0	0	0	0	0	16	0	16	0	0	0	0	0	0	12	0	0	2	0	4	2	0	14	12	6	0	0	0	94	3.15524e-22	8.26672e-18	8.11086e-18	1.67005e-20
Glyma.15G187800	10	5	4	0	7	0	0	10	12	10	4	7	10	7	10	4	12	0	5	4	5	6	10	7	10	2	1	0	5	21	146	3.935e-22	1.03097e-17	1.01149e-17	2.07857e-20
Glyma.10G086100	13	0	0	0	7	0	0	8	4	8	0	1	2	0	0	0	10	2	1	4	1	5	8	6	7	8	7	3	0	3	102	4.39766e-22	1.15219e-17	1.13033e-17	2.31363e-20
Glyma.12G114900	3	0	0	0	0	0	0	3	3	3	0	0	3	0	3	0	18	0	0	6	0	12	9	6	12	15	3	6	0	3	102	4.39766e-22	1.15219e-17	1.13033e-17	2.31363e-20
Glyma.04G096100	28	0	0	0	7	0	0	7	28	7	0	7	28	0	21	0	28	7	0	0	0	7	14	0	7	7	7	0	0	35	175	4.41887e-22	1.15774e-17	1.13574e-17	2.32013e-20
Glyma.07G075550	10	0	5	0	0	0	0	10	10	10	0	0	10	0	10	0	15	0	0	5	0	10	0	5	10	10	10	0	0	10	120	5.03008e-22	1.31788e-17	1.29258e-17	2.61484e-20
Glyma.13G145100	10	0	5	0	10	0	0	5	5	5	0	0	10	0	10	0	10	5	0	5	0	5	5	5	10	5	10	0	10	10	120	5.03008e-22	1.31788e-17	1.29258e-17	2.61485e-20
Glyma.13G197000	10	5	0	0	10	0	0	5	10	5	0	0	10	5	10	0	10	0	0	0	0	5	5	10	10	10	10	0	0	10	120	5.03008e-22	1.31788e-17	1.29258e-17	2.61485e-20
Glyma.13G328100	10	0	0	0	10	0	0	10	10	10	0	0	10	0	10	0	10	0	0	10	0	10	0	0	10	10	10	0	0	10	120	5.03008e-22	1.31788e-17	1.29258e-17	2.61485e-20
Glyma.17G086900	10	0	0	0	10	0	0	10	10	10	0	0	10	0	10	0	10	0	0	10	0	10	0	0	10	10	10	0	0	10	120	5.03008e-22	1.31788e-17	1.29258e-17	2.61485e-20
Glyma.18G051100	7	0	7	0	7	0	0	7	7	7	0	0	7	7	7	0	7	0	0	0	0	7	7	7	7	7	7	7	0	7	112	6.25034e-22	1.63759e-17	1.6059e-17	3.2236e-20
Glyma.18G182500	7	0	0	0	7	0	0	7	7	7	0	0	7	0	7	0	14	0	0	7	0	7	7	0	7	14	7	7	0	7	112	6.25034e-22	1.63759e-17	1.6059e-17	3.2236e-20
Glyma.20G006400	28	0	0	0	0	0	0	7	0	7	0	0	7	0	7	0	14	14	0	0	0	7	7	0	0	21	0	0	0	7	112	6.25034e-22	1.63759e-17	1.6059e-17	3.2236e-20
Glyma.10G121584	0	0	0	0	0	0	0	35	21	35	0	0	7	0	0	0	7	0	0	0	0	0	0	0	14	0	0	0	0	7	112	6.25034e-22	1.63759e-17	1.6059e-17	3.2236e-20
Glyma.04G099300	8	0	0	0	4	0	0	4	8	4	0	0	4	0	8	0	12	4	0	4	0	4	8	4	8	8	8	8	0	4	104	6.42475e-22	1.68328e-17	1.65065e-17	3.30704e-20
Glyma.09G208600	12	0	0	0	12	0	0	16	16	16	0	12	28	4	8	0	20	0	0	0	4	16	4	8	12	20	12	4	0	40	184	6.49382e-22	1.70138e-17	1.66826e-17	3.32951e-20
Glyma.03G249800	9	0	9	0	9	0	0	9	0	9	0	0	9	0	9	0	9	9	0	0	0	9	9	0	9	9	9	0	0	9	117	6.49382e-22	1.70138e-17	1.66826e-17	3.32951e-20
Glyma.02G098500	8	0	0	0	0	0	24	8	24	8	0	8	24	0	16	0	24	0	0	0	0	8	16	16	8	8	0	0	0	32	168	6.80086e-22	1.78183e-17	1.74707e-17	3.48013e-20
Glyma.09G149900	9	0	3	0	15	0	0	15	15	15	0	3	15	6	15	0	3	0	0	9	0	0	0	0	15	9	9	0	0	18	138	7.41953e-22	1.94392e-17	1.90593e-17	3.78931e-20
Glyma.03G055000	12	0	0	0	4	0	0	8	16	8	0	4	8	4	4	0	24	0	0	0	0	4	4	4	12	4	16	0	0	12	124	7.69599e-22	2.01635e-17	1.97672e-17	3.90765e-20
Glyma.08G250800	12	0	0	0	12	0	0	16	12	16	0	0	12	8	12	0	0	0	0	0	0	0	0	4	8	12	12	0	0	12	124	7.69599e-22	2.01635e-17	1.97672e-17	3.90766e-20
Glyma.15G232800	14	0	2	0	0	0	0	16	14	16	0	0	12	0	2	0	6	0	6	0	2	10	4	6	14	6	6	0	0	12	124	7.69599e-22	2.01635e-17	1.97672e-17	3.90766e-20
Glyma.01G124100	8	0	0	0	8	0	4	8	8	8	0	0	0	4	8	0	4	0	0	4	0	4	4	4	8	4	4	0	0	0	92	8.66765e-22	2.27092e-17	2.22611e-17	4.38402e-20
Glyma.10G218000	8	0	0	0	0	0	0	0	12	0	0	0	0	0	0	0	8	4	0	4	0	12	8	12	8	8	8	0	0	0	92	8.66765e-22	2.27092e-17	2.22611e-17	4.38402e-20
Glyma.19G064000	14	0	0	0	4	0	0	6	16	6	2	2	16	0	6	0	16	0	0	4	0	6	14	2	18	18	10	2	0	20	142	9.22561e-22	2.41711e-17	2.36932e-17	4.65725e-20
Glyma.06G097800	11	0	0	0	0	0	0	11	11	11	0	0	11	0	11	0	11	0	0	11	0	11	0	0	11	11	11	0	0	11	121	1.02578e-21	2.68755e-17	2.63431e-17	5.16837e-20
Glyma.19G063800	20	0	0	0	4	0	0	8	18	8	0	2	20	2	4	0	18	0	0	2	0	6	12	0	18	16	10	0	0	22	146	1.10257e-21	2.88875e-17	2.83141e-17	5.54462e-20
Glyma.09G062500	12	0	12	0	6	0	0	6	6	6	0	6	0	0	0	0	6	0	0	6	0	6	6	12	6	6	6	6	0	6	108	1.25781e-21	3.29546e-17	3.22993e-17	6.31314e-20
Glyma.07G173700	15	0	0	0	5	0	0	10	10	10	0	5	10	5	10	0	10	0	0	5	0	5	5	10	10	10	10	0	0	15	130	1.29408e-21	3.3905e-17	3.32282e-17	6.47042e-20
Glyma.15G172300	15	0	0	0	15	0	0	0	15	0	0	0	15	0	15	0	0	0	0	0	0	15	5	0	15	20	15	0	0	15	130	1.29408e-21	3.3905e-17	3.32282e-17	6.47042e-20
Glyma.03G038800	6	0	4	0	4	0	0	14	4	14	0	4	6	4	4	0	12	2	0	2	0	4	4	10	14	8	6	2	0	10	118	1.34877e-21	3.53377e-17	3.4631e-17	6.73099e-20
Glyma.01G074700	9	0	0	0	4	8	5	9	8	9	0	0	8	1	2	0	18	0	0	0	0	5	5	0	16	7	6	1	0	8	113	1.35512e-21	3.55042e-17	3.47927e-17	6.74984e-20
Glyma.16G038900	0	0	18	0	0	0	0	0	0	0	0	24	18	0	12	0	30	12	0	0	0	0	12	18	24	24	24	12	0	42	186	1.47545e-21	3.86568e-17	3.78807e-17	7.33525e-20
Glyma.03G037100	10	0	0	0	10	0	0	8	12	8	0	6	10	2	6	0	8	10	0	10	0	10	8	2	10	8	8	2	0	16	132	1.49682e-21	3.92166e-17	3.84278e-17	7.42738e-20
Glyma.15G218000	4	0	0	0	20	0	0	4	28	4	0	6	32	4	6	0	30	0	0	2	0	20	0	0	12	30	12	2	0	38	178	1.63786e-21	4.29119e-17	4.20471e-17	8.11189e-20
Glyma.07G204700	4	0	4	0	10	0	0	4	4	4	0	0	4	0	8	0	16	2	0	4	0	4	4	4	12	4	10	4	0	4	102	1.75525e-21	4.59876e-17	4.50591e-17	8.67691e-20
Glyma.03G073758	14	0	0	0	6	0	0	16	12	16	0	0	12	0	0	0	18	0	0	0	0	6	2	0	16	12	2	2	0	12	122	2.04807e-21	5.36594e-17	5.2574e-17	1.01054e-19
Glyma.18G079000	18	0	0	0	9	0	0	3	3	3	0	3	12	3	3	0	12	0	3	9	0	12	6	6	12	12	12	3	0	15	129	2.0989e-21	5.49913e-17	5.38767e-17	1.03367e-19
Glyma.01G098200	8	0	0	0	8	8	8	8	8	8	0	0	8	0	8	0	8	0	0	0	0	8	8	0	8	8	8	0	0	8	112	2.22639e-21	5.83314e-17	5.71447e-17	1.09235e-19
Glyma.20G014300	8	0	0	0	8	0	0	8	8	8	0	0	8	0	4	0	8	4	0	8	0	8	8	4	8	8	8	4	0	8	112	2.22639e-21	5.83314e-17	5.71447e-17	1.09235e-19
Glyma.16G138700	12	0	4	0	12	0	0	8	12	8	0	8	12	8	4	4	12	0	0	0	0	12	8	8	12	12	4	0	0	20	140	2.3816e-21	6.23979e-17	6.11142e-17	1.15552e-19
Glyma.18G233100	6	0	6	0	0	0	0	6	0	6	0	0	0	0	6	0	6	6	0	6	0	6	6	6	6	6	6	6	0	0	90	2.3816e-21	6.23979e-17	6.11142e-17	1.15552e-19
Glyma.01G240500	10	0	0	0	0	0	10	10	0	10	0	0	0	0	0	0	10	0	0	5	0	0	0	0	10	10	10	5	0	0	90	2.3816e-21	6.23979e-17	6.11142e-17	1.15552e-19
Glyma.04G135700	18	0	2	0	0	0	0	0	6	0	0	0	0	0	6	0	10	0	0	0	0	8	6	2	12	14	6	0	0	0	90	2.3816e-21	6.23979e-17	6.11142e-17	1.15552e-19
Glyma.04G182900	14	0	0	0	0	0	0	14	0	14	0	0	0	0	0	0	0	0	0	0	0	12	8	0	14	14	0	0	0	0	90	2.3816e-21	6.23979e-17	6.11142e-17	1.15552e-19
Glyma.05G232900	10	0	0	0	10	0	0	10	10	10	0	10	10	10	10	0	10	0	0	10	0	0	10	10	10	10	10	0	0	20	140	2.3816e-21	6.23979e-17	6.11142e-17	1.15552e-19
Glyma.16G095900	16	2	0	0	6	0	0	25	22	25	1	1	33	0	3	0	22	0	0	2	0	6	4	0	19	10	5	4	0	35	171	2.65311e-21	6.95114e-17	6.80787e-17	1.28487e-19
Glyma.06G238876	9	0	0	0	9	0	0	15	15	15	0	0	9	3	3	0	9	3	0	3	0	6	6	0	9	6	3	0	0	9	114	2.86536e-21	7.50724e-17	7.35222e-17	1.3851e-19
Glyma.18G143600	10	0	0	0	10	0	0	15	25	15	0	0	25	0	0	0	20	0	0	0	0	5	0	0	25	15	10	0	0	25	150	3.41718e-21	8.95301e-17	8.76745e-17	1.64577e-19
Glyma.18G143900	30	0	0	0	0	0	0	10	15	10	0	0	25	0	5	0	15	0	0	0	0	5	10	5	20	20	5	0	0	25	150	3.41718e-21	8.95301e-17	8.76745e-17	1.64577e-19
Glyma.03G044250	6	0	4	0	6	0	0	6	10	6	0	4	6	0	6	0	10	6	0	2	0	6	10	6	12	12	8	0	0	10	116	3.6146e-21	9.47024e-17	9.27325e-17	1.73448e-19
Glyma.11G205800	10	0	0	0	10	0	0	10	10	10	0	0	10	0	6	0	10	2	0	2	0	10	6	2	10	10	8	0	0	10	116	3.6146e-21	9.47024e-17	9.27325e-17	1.73448e-19
Glyma.08G188000	8	0	0	0	4	0	0	8	8	8	0	0	4	8	8	0	4	4	0	8	0	4	4	8	8	4	4	0	0	4	100	4.79545e-21	1.25641e-16	1.23008e-16	2.28438e-19
Glyma.19G071500	27	0	0	0	0	0	0	3	27	3	0	3	42	0	9	0	21	0	0	0	0	18	15	3	27	21	12	3	0	45	189	4.79545e-21	1.25641e-16	1.23008e-16	2.28438e-19
Glyma.20G074700	16	0	0	0	16	0	0	0	8	0	0	4	0	0	0	0	8	0	0	0	0	12	8	0	8	16	8	0	0	4	100	4.79545e-21	1.25641e-16	1.23008e-16	2.28438e-19
Glyma.20G106800	8	0	0	0	4	0	0	4	4	4	0	0	4	4	0	0	12	0	0	8	0	4	8	0	16	8	8	8	0	4	100	4.79545e-21	1.25641e-16	1.23008e-16	2.28438e-19
Glyma.19G068300	19	0	3	0	3	0	0	9	15	9	0	1	22	0	2	0	21	0	0	2	0	8	7	2	21	16	6	2	0	23	145	4.84454e-21	1.26927e-16	1.24262e-16	2.30357e-19
Glyma.01G113901	9	0	0	0	7	7	9	6	6	6	0	0	3	2	3	0	8	1	0	1	0	5	5	2	6	10	3	1	0	3	97	5.45631e-21	1.42955e-16	1.39916e-16	2.56192e-19
Glyma.04G139200	2	0	0	0	2	0	0	1	34	1	0	1	2	0	6	0	25	0	0	0	0	2	7	2	12	1	2	0	0	3	97	5.45631e-21	1.42955e-16	1.39916e-16	2.56192e-19
Glyma.07G093700	8	0	4	0	4	0	0	8	4	8	0	4	8	0	8	0	8	4	0	4	4	8	8	8	8	8	8	8	0	12	120	5.44629e-21	1.42693e-16	1.3967e-16	2.56192e-19
Glyma.07G230400	8	0	4	0	8	0	0	8	8	8	0	4	8	8	8	0	8	4	0	0	0	8	8	8	8	8	8	0	0	12	120	5.44629e-21	1.42693e-16	1.3967e-16	2.56192e-19
Glyma.10G101200	15	3	3	3	6	0	0	6	6	6	0	3	9	3	3	3	18	0	0	3	3	6	3	3	12	6	3	3	3	12	120	5.44629e-21	1.42693e-16	1.3967e-16	2.56192e-19
Glyma.13G181000	12	0	0	0	0	0	0	4	12	4	0	4	8	4	4	0	12	8	0	4	0	4	8	12	4	12	8	8	0	12	120	5.44629e-21	1.42693e-16	1.3967e-16	2.56192e-19
Glyma.18G203800	18	0	4	0	2	0	0	2	2	2	0	10	2	0	2	0	30	0	0	2	0	2	18	16	16	2	2	0	0	12	120	5.44629e-21	1.42693e-16	1.3967e-16	2.56192e-19
Glyma.02G166500	18	0	0	0	6	0	6	6	6	6	0	0	6	0	6	0	6	0	0	6	0	3	6	0	18	6	6	0	0	6	105	5.63204e-21	1.47559e-16	1.44411e-16	2.63499e-19
Glyma.12G222100	6	0	3	0	6	0	0	12	15	12	0	0	6	0	3	0	6	0	0	3	0	6	6	3	15	6	3	0	0	6	105	5.63204e-21	1.47559e-16	1.44411e-16	2.63499e-19
Glyma.08G266700	10	0	0	0	10	0	0	10	10	10	0	0	10	0	10	0	10	0	0	5	0	0	10	0	10	10	10	0	0	10	115	5.91599e-21	1.54999e-16	1.5168e-16	2.75799e-19
Glyma.13G196600	10	0	0	0	5	0	0	10	10	10	0	0	10	0	5	0	10	5	0	0	0	20	0	5	10	10	5	0	0	10	115	5.91599e-21	1.54999e-16	1.5168e-16	2.75799e-19
Glyma.04G120600	14	0	0	0	2	0	0	14	14	14	0	0	8	0	0	0	16	0	0	0	0	0	4	0	16	8	2	6	0	8	110	6.00794e-21	1.57408e-16	1.54032e-16	2.79491e-19
Glyma.09G075400	10	0	0	0	6	0	0	10	10	10	0	0	2	4	2	0	2	2	0	2	2	6	4	2	10	8	4	0	0	2	94	6.01653e-21	1.57633e-16	1.54246e-16	2.79491e-19
Glyma.01G112900	7	0	1	0	4	6	6	6	6	6	0	0	1	3	3	0	6	1	0	2	0	5	5	4	7	6	7	0	0	1	91	6.40314e-21	1.67762e-16	1.64151e-16	2.96924e-19
Glyma.09G259200	11	0	0	0	0	0	0	0	0	0	0	0	0	0	0	0	11	22	0	11	0	0	22	0	0	0	11	0	0	0	88	6.54545e-21	1.71491e-16	1.67773e-16	3.0139e-19
Glyma.11G031400	0	0	16	0	0	0	0	0	0	0	0	0	0	0	0	0	24	0	0	0	0	0	0	0	24	0	0	24	0	0	88	6.54545e-21	1.71491e-16	1.67773e-16	3.0139e-19
Glyma.16G031700	0	0	0	0	0	0	0	0	8	0	0	0	0	0	0	0	48	0	0	0	0	0	0	0	16	0	0	16	0	0	88	6.54545e-21	1.71491e-16	1.67773e-16	3.0139e-19
Glyma.01G214100	8	0	0	0	0	0	8	8	8	8	0	0	0	0	0	0	8	0	0	0	0	0	8	8	8	8	8	0	0	0	88	6.54545e-21	1.71491e-16	1.67773e-16	3.0139e-19
Glyma.06G226700	14	0	0	0	7	0	0	18	12	18	0	1	16	0	4	0	13	0	0	1	0	5	7	0	12	13	6	1	0	17	131	7.20242e-21	1.88703e-16	1.84605e-16	3.31059e-19
Glyma.02G201900	15	0	0	0	18	0	0	18	15	18	0	0	15	0	3	0	0	0	0	0	0	12	6	3	18	0	0	0	0	15	126	8.94167e-21	2.34272e-16	2.29175e-16	4.10283e-19
Glyma.16G155300	9	0	0	0	9	0	0	0	0	0	0	3	0	0	6	0	9	6	0	6	0	9	6	6	3	9	9	9	0	3	96	9.02954e-21	2.36574e-16	2.31409e-16	4.12869e-19
Glyma.15G100900	0	0	0	0	12	0	0	0	0	0	3	0	0	0	0	0	12	0	0	0	0	0	12	12	12	12	12	12	0	3	96	9.02954e-21	2.36574e-16	2.31409e-16	4.12869e-19
Glyma.01G095566	16	0	0	0	2	4	10	4	12	4	0	0	6	0	2	0	10	0	0	0	0	0	10	0	12	12	4	2	0	6	104	9.28203e-21	2.43189e-16	2.37871e-16	4.23674e-19
Glyma.15G092400	21	0	7	0	0	0	0	0	21	0	0	7	21	7	7	0	21	0	0	0	7	7	14	21	21	0	0	0	0	28	154	9.65697e-21	2.53013e-16	2.47469e-16	4.40022e-19
Glyma.15G273600	12	0	0	0	8	0	0	8	12	8	0	4	12	0	8	0	12	4	0	0	0	12	4	8	12	12	8	0	0	16	128	1.02593e-20	2.68793e-16	2.62893e-16	4.66654e-19
Glyma.12G205900	12	0	0	0	0	0	0	0	0	0	0	0	0	0	0	0	12	0	0	12	0	0	12	12	12	0	6	9	0	0	87	1.08521e-20	2.84325e-16	2.78064e-16	4.91913e-19
Glyma.13G170700	9	0	0	0	0	0	0	0	9	0	0	0	0	0	9	0	9	3	0	6	0	3	6	6	9	9	9	0	0	0	87	1.08521e-20	2.84325e-16	2.78064e-16	4.91913e-19
Glyma.03G021100	10	0	0	0	10	0	0	10	10	10	0	5	10	10	0	0	10	0	0	5	0	10	10	5	10	10	5	0	0	15	125	1.44877e-20	3.79577e-16	3.71203e-16	6.55573e-19
Glyma.06G219200	18	0	0	0	6	0	0	12	14	12	0	2	18	0	8	0	14	0	0	4	0	6	12	0	12	14	4	0	0	20	136	1.58054e-20	4.14102e-16	4.04951e-16	7.13969e-19
Glyma.04G147700	8	0	0	0	8	0	0	8	14	8	0	0	8	4	4	0	8	0	0	0	0	8	8	0	16	8	6	0	0	8	108	1.62062e-20	4.24601e-16	4.15153e-16	7.27057e-19
Glyma.09G146200	8	0	0	0	0	0	0	24	4	24	0	0	8	8	0	0	12	0	0	0	0	4	0	0	20	4	0	0	0	8	108	1.62062e-20	4.24601e-16	4.15153e-16	7.27057e-19
Glyma.14G120300	4	0	0	0	2	0	0	4	30	4	0	4	4	0	14	0	34	0	0	0	0	2	0	2	4	4	4	0	0	8	108	1.62062e-20	4.24601e-16	4.15153e-16	7.27057e-19
Glyma.16G085700	12	0	0	0	8	0	0	4	12	4	0	0	8	4	8	0	12	0	0	0	0	4	12	0	8	8	8	4	0	8	108	1.62062e-20	4.24601e-16	4.15153e-16	7.27057e-19
Glyma.04G137100	1	0	0	0	1	0	0	1	20	1	0	1	1	1	15	0	16	0	0	0	0	1	12	3	18	1	1	0	0	2	92	1.65096e-20	4.32551e-16	4.22909e-16	7.39403e-19
Glyma.01G031800	10	0	0	0	5	15	0	5	10	5	0	5	0	5	15	0	0	5	0	0	0	10	5	0	10	0	0	0	0	5	100	1.84321e-20	4.82921e-16	4.72102e-16	8.21295e-19
Glyma.08G303800	10	0	0	0	5	0	0	5	5	5	0	0	5	0	5	0	10	5	5	0	0	5	5	5	5	10	10	5	0	5	100	1.84321e-20	4.82921e-16	4.72102e-16	8.21295e-19
Glyma.20G075600	11	0	3	0	8	0	0	1	12	1	0	4	1	0	1	1	6	0	1	5	0	6	9	4	12	11	8	0	0	5	100	1.84321e-20	4.82921e-16	4.72102e-16	8.21295e-19
Glyma.04G241900	7	0	0	0	7	0	0	7	7	7	0	0	7	0	7	0	7	0	0	7	0	7	7	7	7	7	7	7	0	7	105	2.04184e-20	5.34963e-16	5.22936e-16	9.06716e-19
Glyma.15G165500	7	0	0	0	0	0	0	7	7	7	0	0	7	0	7	0	0	0	0	0	0	21	7	7	14	7	7	7	0	7	105	2.04184e-20	5.34963e-16	5.22936e-16	9.06716e-19
Glyma.07G175400	10	2	0	0	14	0	0	12	8	12	6	2	18	2	6	2	12	0	0	6	0	14	10	0	14	8	8	6	2	26	148	2.27035e-20	5.94832e-16	5.81437e-16	1.00648e-18
Glyma.04G150900	9	0	0	0	6	0	0	15	12	15	0	0	12	0	3	0	15	0	0	0	0	6	3	0	21	9	3	0	0	12	117	2.35825e-20	6.17863e-16	6.03902e-16	1.04193e-18
Glyma.16G209300	15	0	6	0	0	0	0	0	15	0	0	12	0	0	0	0	3	12	3	0	0	0	0	15	15	15	15	3	0	12	117	2.35825e-20	6.17863e-16	6.03902e-16	1.04193e-18
Glyma.10G141400	6	0	6	0	6	0	0	6	6	6	0	6	0	0	0	6	6	6	0	6	0	6	6	6	6	6	6	6	0	6	102	2.52078e-20	6.60444e-16	6.4542e-16	1.10627e-18
Glyma.19G033700	6	0	0	0	6	0	0	6	6	6	0	0	6	0	6	0	6	0	0	6	0	6	0	6	24	6	6	6	0	6	102	2.52078e-20	6.60444e-16	6.4542e-16	1.10627e-18
Glyma.04G124500	0	0	9	0	0	0	0	0	27	0	0	6	0	0	12	0	12	0	0	0	0	0	6	12	18	0	6	0	0	6	102	2.52078e-20	6.60444e-16	6.4542e-16	1.10627e-18
Glyma.06G223800	0	0	0	0	6	0	0	24	24	24	0	6	0	0	0	0	0	0	0	0	0	0	0	0	24	0	0	0	0	6	102	2.52078e-20	6.60444e-16	6.4542e-16	1.10627e-18
Glyma.15G206000	14	2	0	0	5	0	0	12	12	12	0	0	10	1	5	0	9	0	0	0	0	5	2	1	12	12	5	3	0	10	112	2.59141e-20	6.7895e-16	6.63479e-16	1.13537e-18
Glyma.18G143200	6	0	0	0	12	0	0	4	14	4	0	2	14	4	6	0	10	0	0	0	0	10	6	4	16	14	14	2	0	16	126	2.6813e-20	7.02499e-16	6.86465e-16	1.17279e-18
Glyma.01G115100	8	1	0	0	4	4	8	9	9	9	0	0	2	0	4	0	8	0	0	1	0	5	3	0	9	7	2	0	0	2	91	2.73502e-20	7.16574e-16	7.00192e-16	1.19429e-18
Glyma.03G061300	18	0	0	0	6	0	0	16	16	16	0	2	16	2	6	0	8	0	0	0	0	6	8	0	14	8	2	4	0	18	130	3.37424e-20	8.84051e-16	8.63806e-16	1.47097e-18
Glyma.05G198100	8	0	0	0	8	0	0	0	8	0	0	4	0	0	8	0	8	0	0	4	0	8	8	4	8	8	8	8	0	4	96	3.5795e-20	9.37828e-16	9.1628e-16	1.55527e-18
Glyma.13G009500	4	0	4	0	0	0	0	0	16	0	0	4	0	0	0	0	4	0	0	16	0	4	4	4	16	16	8	0	0	4	96	3.5795e-20	9.37828e-16	9.1628e-16	1.55527e-18
Glyma.02G164116	17	0	0	0	4	0	7	14	10	14	0	0	13	0	1	0	9	0	0	0	0	6	7	0	15	8	4	2	0	13	118	4.5624e-20	1.19535e-15	1.16784e-15	1.97905e-18
Glyma.01G108700	7	0	0	0	5	8	6	7	7	7	0	0	0	1	4	0	6	0	0	2	0	4	3	2	6	7	2	0	0	0	84	4.94775e-20	1.29631e-15	1.26593e-15	2.10782e-18
Glyma.01G146600	12	0	0	0	9	0	12	12	12	12	0	0	0	0	3	0	12	0	0	0	0	0	0	0	0	0	0	0	0	0	84	4.94775e-20	1.29631e-15	1.26593e-15	2.10782e-18
Glyma.07G007700	7	0	0	0	0	0	0	7	7	7	0	0	0	0	0	0	7	7	0	0	0	0	14	7	7	7	7	0	0	0	84	4.94775e-20	1.29631e-15	1.26593e-15	2.10782e-18
Glyma.12G022500	8	0	0	0	0	0	0	8	0	8	0	0	0	0	0	0	8	4	0	0	0	8	8	0	8	8	8	8	0	0	84	4.94775e-20	1.29631e-15	1.26593e-15	2.10782e-18
Glyma.15G258300	12	0	6	0	0	0	0	6	12	6	0	0	0	0	0	0	12	0	0	3	0	0	0	3	0	12	12	0	0	0	84	4.94775e-20	1.29631e-15	1.26593e-15	2.10782e-18
Glyma.18G052100	21	0	0	0	0	0	0	0	21	0	0	0	0	0	0	0	0	21	0	0	0	21	0	0	0	0	0	0	0	0	84	4.94775e-20	1.29631e-15	1.26593e-15	2.10782e-18
Glyma.18G168800	4	1	1	0	6	0	0	12	6	12	0	3	14	2	3	0	14	7	0	2	0	9	7	8	9	14	8	1	1	17	127	4.87871e-20	1.27822e-15	1.24876e-15	2.10782e-18
Glyma.18G235900	14	0	0	0	0	0	0	7	0	7	0	0	0	0	0	0	14	0	0	0	0	7	0	7	7	7	14	0	0	0	84	4.94775e-20	1.29631e-15	1.26593e-15	2.10782e-18
Glyma.02G265100	0	0	0	0	21	0	0	0	0	0	0	0	0	0	0	0	0	0	0	0	0	0	0	0	21	21	0	21	0	0	84	4.94775e-20	1.29631e-15	1.26593e-15	2.10782e-18
Glyma.03G193200	0	0	0	0	0	0	0	0	42	0	0	0	0	0	0	0	42	0	0	0	0	0	0	0	0	0	0	0	0	0	84	4.94775e-20	1.29631e-15	1.26593e-15	2.10782e-18
Glyma.05G107800	0	0	0	0	0	0	0	0	0	0	0	0	0	0	0	0	18	4	0	0	0	14	0	0	16	16	12	4	0	0	84	4.94775e-20	1.29631e-15	1.26593e-15	2.10782e-18
Glyma.20G014200	8	0	0	2	8	0	0	8	8	8	2	4	8	0	8	2	8	2	0	4	4	8	8	2	8	8	8	8	0	14	120	5.33574e-20	1.39797e-15	1.36515e-15	2.26942e-18
Glyma.09G095400	6	0	0	0	15	0	0	21	6	21	0	0	9	0	0	0	3	0	0	0	0	9	0	0	21	6	0	0	0	9	108	5.56035e-20	1.45681e-15	1.42251e-15	2.3573e-18
Glyma.11G154005	27	0	0	0	0	0	0	0	0	0	0	9	0	0	0	0	0	0	0	0	0	0	18	18	27	9	0	9	0	9	108	5.56035e-20	1.45681e-15	1.42251e-15	2.3573e-18
Glyma.18G079400	20	0	0	0	5	0	0	5	5	5	0	0	10	0	0	0	10	5	0	5	0	10	5	5	10	10	10	0	0	10	110	6.93208e-20	1.81621e-15	1.77336e-15	2.9341e-18
Glyma.12G129800	8	0	0	0	8	0	0	8	20	8	0	0	16	0	8	0	20	0	0	0	0	4	12	0	20	8	0	0	0	16	124	6.9992e-20	1.83379e-15	1.7904e-15	2.95296e-18
Glyma.05G235700	8	0	4	0	8	0	0	8	8	8	0	8	8	4	8	0	8	0	0	8	4	0	8	8	8	8	8	8	0	16	124	6.9992e-20	1.83379e-15	1.79039e-15	2.95296e-18
Glyma.15G160300	18	0	0	0	3	0	0	15	18	15	0	3	18	0	9	0	15	0	0	0	0	12	3	0	15	12	0	0	0	21	135	7.02258e-20	1.83992e-15	1.79631e-15	2.95806e-18
Glyma.03G065100	11	0	1	0	8	0	0	10	11	10	0	0	11	0	3	0	17	0	0	1	0	3	4	1	9	13	7	3	0	11	112	8.47981e-20	2.22171e-15	2.16897e-15	3.56615e-18
Glyma.17G119400	7	0	7	0	7	0	0	7	7	7	0	7	7	0	7	0	14	0	0	7	0	7	7	7	7	7	14	0	0	14	119	8.65413e-20	2.26738e-15	2.21347e-15	3.63362e-18
Glyma.15G194900	0	0	0	0	12	0	0	0	18	0	0	9	18	3	15	0	21	3	0	3	0	24	0	3	9	21	15	0	0	27	147	9.27106e-20	2.42902e-15	2.37117e-15	3.88643e-18
Glyma.02G157002	6	0	6	0	6	0	6	6	12	6	0	6	6	6	6	0	6	6	0	0	0	6	6	6	6	6	6	6	0	12	114	1.0192e-19	2.6703e-15	2.60639e-15	4.25206e-18
Glyma.10G121600	9	0	0	0	9	0	0	9	9	9	0	3	9	0	6	3	9	0	0	3	0	9	9	3	9	9	9	0	0	12	114	1.0192e-19	2.6703e-15	2.60639e-15	4.25206e-18
Glyma.13G201800	6	0	0	0	12	0	0	6	9	6	0	3	9	12	6	3	9	0	0	3	0	12	9	6	6	6	3	0	0	12	114	1.0192e-19	2.6703e-15	2.60639e-15	4.25206e-18
Glyma.06G240500	8	0	0	0	8	0	0	16	12	16	0	0	20	0	4	0	8	4	0	0	8	8	0	8	16	8	4	4	0	20	132	1.04273e-19	2.73194e-15	2.66646e-15	4.34331e-18
Glyma.01G118800	12	0	0	0	6	6	9	0	6	0	0	0	6	0	3	0	12	0	0	0	0	12	0	6	9	12	6	0	0	6	99	1.12772e-19	2.95463e-15	2.8837e-15	4.68989e-18
Glyma.12G162963	8	0	0	0	8	0	0	8	8	8	0	0	8	0	8	0	8	0	0	0	0	8	8	0	8	8	8	8	0	8	104	1.1777e-19	3.08558e-15	3.01115e-15	4.87453e-18
Glyma.07G040700	0	0	0	0	0	0	0	8	8	8	0	8	0	0	8	0	8	8	0	8	0	8	8	8	8	8	8	0	0	8	104	1.1777e-19	3.08558e-15	3.01115e-15	4.87453e-18
Glyma.06G256700	0	0	0	0	0	0	0	0	0	0	0	8	0	0	8	0	16	0	0	16	0	16	8	8	0	16	0	16	0	8	104	1.1777e-19	3.08558e-15	3.01115e-15	4.87453e-18
Glyma.02G186800	9	0	0	0	6	0	12	11	10	11	0	1	1	0	1	0	1	0	0	0	0	4	1	0	11	8	3	0	0	2	88	1.2438e-19	3.25877e-15	3.18004e-15	5.14001e-18
Glyma.01G115500	7	0	0	0	5	8	4	6	6	6	0	0	1	2	5	0	6	2	0	2	0	2	4	3	6	6	5	0	0	1	85	1.32922e-19	3.48255e-15	3.39827e-15	5.48432e-18
Glyma.01G113000	6	0	0	0	6	4	5	5	5	5	0	0	0	1	7	0	7	1	0	1	0	5	4	3	6	5	4	2	0	0	82	1.36087e-19	3.56547e-15	3.47906e-15	5.60609e-18
Glyma.18G138900	10	0	0	1	10	0	0	10	11	10	0	4	14	2	8	0	11	0	0	0	0	9	9	1	12	11	8	4	0	18	127	1.40428e-19	3.67922e-15	3.58991e-15	5.77585e-18
Glyma.18G155800	7	1	3	6	6	0	0	5	6	5	3	2	4	5	8	3	12	7	5	4	3	1	4	3	3	2	2	3	2	9	106	1.49259e-19	3.9106e-15	3.81552e-15	6.12946e-18
Glyma.04G086600	6	0	0	0	9	0	0	9	9	9	0	6	9	0	9	0	3	6	0	3	0	9	6	6	15	6	9	6	0	15	120	1.61088e-19	4.2205e-15	4.11756e-15	6.59452e-18
Glyma.07G096300	10	0	10	0	0	0	0	5	10	5	0	5	10	0	10	0	15	5	0	0	0	10	10	5	5	10	10	0	0	15	120	1.61088e-19	4.2205e-15	4.11756e-15	6.59452e-18
Glyma.16G090600	20	0	0	0	12	0	0	5	14	5	0	0	20	0	4	0	19	0	1	2	1	1	7	0	18	17	5	0	0	20	131	1.6695e-19	4.37408e-15	4.26723e-15	6.82383e-18
Glyma.14G052400	14	0	0	0	7	0	0	7	7	7	7	7	7	7	7	0	7	7	0	7	0	14	7	7	7	7	7	7	0	21	133	1.79339e-19	4.69869e-15	4.58373e-15	7.31883e-18
Glyma.18G239200	6	0	3	0	0	0	0	6	9	6	0	3	0	0	6	0	6	3	0	9	0	6	6	0	6	6	6	6	0	3	90	1.85566e-19	4.86182e-15	4.7425e-15	7.54941e-18
Glyma.05G203300	9	0	0	0	9	0	0	3	3	3	0	0	3	0	0	0	9	0	0	0	0	9	9	9	9	9	9	0	0	3	90	1.85566e-19	4.86182e-15	4.7425e-15	7.54941e-18
Glyma.08G265300	12	0	0	0	6	0	0	12	6	12	0	0	18	6	6	0	18	6	0	6	0	6	6	6	6	6	6	0	0	18	126	2.25718e-19	5.9138e-15	5.76709e-15	9.08418e-18
Glyma.09G074300	6	0	0	0	12	0	0	12	12	12	0	12	6	6	0	0	6	0	0	6	0	12	12	0	12	6	6	6	0	18	126	2.25718e-19	5.9138e-15	5.76709e-15	9.08418e-18
Glyma.10G169100	5	0	5	0	5	0	0	10	10	10	0	5	0	5	0	5	10	0	0	5	0	5	0	5	5	5	5	0	0	5	95	2.25718e-19	5.9138e-15	5.76709e-15	9.08418e-18
Glyma.20G218902	12	0	0	0	6	0	0	6	6	6	0	12	6	0	6	0	6	6	6	12	0	6	12	12	6	6	12	0	0	18	126	2.25718e-19	5.9138e-15	5.76709e-15	9.08418e-18
Glyma.01G031900	11	0	0	0	11	11	0	11	11	11	0	11	0	0	11	0	0	0	0	0	0	11	11	0	11	0	0	0	0	11	110	2.25718e-19	5.9138e-15	5.76709e-15	9.08418e-18
Glyma.01G209900	12	0	0	0	0	0	0	0	12	0	0	12	6	12	6	0	12	6	0	0	0	6	6	6	12	12	12	12	0	18	126	2.25718e-19	5.9138e-15	5.76709e-15	9.08418e-18
Glyma.03G124500	6	0	0	0	9	0	0	6	6	6	0	0	0	0	0	0	9	0	0	0	0	6	3	3	18	6	3	0	0	0	81	2.25718e-19	5.9138e-15	5.76709e-15	9.08418e-18
Glyma.19G057300	10	0	0	0	1	0	0	18	17	18	0	1	13	0	4	0	17	0	0	0	0	4	3	3	10	9	2	1	0	14	117	2.27468e-19	5.95967e-15	5.81159e-15	9.14059e-18
Glyma.15G217500	6	0	0	0	12	0	0	6	39	6	0	6	54	3	9	0	48	0	0	6	0	12	0	0	12	39	9	0	0	60	207	2.33551e-19	6.11903e-15	5.96676e-15	9.37064e-18
Glyma.04G096500	28	0	0	0	7	0	0	7	28	7	0	0	28	0	21	0	21	0	0	0	0	0	14	0	0	0	14	0	0	28	147	2.35043e-19	6.15812e-15	6.00464e-15	9.41609e-18
Glyma.13G026300	15	0	0	0	0	0	0	9	12	9	0	3	6	0	0	0	18	0	0	0	0	6	12	0	12	9	3	0	0	9	105	2.44493e-19	6.40571e-15	6.24581e-15	9.77971e-18
Glyma.13G152814	8	0	0	0	12	0	0	16	12	16	0	0	12	0	4	0	12	0	0	0	0	12	4	4	12	0	0	0	0	12	112	2.70115e-19	7.07702e-15	6.89955e-15	1.07553e-17
Glyma.13G194100	16	0	0	0	0	0	0	4	16	4	0	0	12	0	8	0	16	0	0	0	4	4	4	12	4	12	8	0	0	12	112	2.70115e-19	7.07702e-15	6.89955e-15	1.07553e-17
Glyma.20G003600	8	0	0	0	8	0	0	8	8	8	0	4	8	0	8	0	8	0	0	4	0	8	4	8	8	8	8	8	0	12	112	2.70115e-19	7.07702e-15	6.89955e-15	1.07553e-17
Glyma.09G093050	1	0	0	0	9	0	0	10	9	10	0	2	1	1	1	0	1	4	4	0	0	7	0	5	9	8	8	2	0	3	89	3.07144e-19	8.04717e-15	7.84507e-15	1.22112e-17
Glyma.18G107500	14	0	0	0	4	0	0	6	4	6	0	2	6	4	10	0	0	0	0	6	0	0	6	4	10	12	10	6	0	8	102	3.1726e-19	8.31221e-15	8.10282e-15	1.25752e-17
Glyma.06G232800	8	0	2	0	10	0	0	8	12	8	0	2	6	2	2	0	10	0	0	2	0	6	2	0	14	8	4	4	0	8	102	3.1726e-19	8.31221e-15	8.10282e-15	1.25752e-17
Glyma.15G164900	18	0	6	0	0	0	0	18	12	18	0	12	12	0	12	0	0	0	0	0	0	12	0	12	6	12	12	0	0	24	138	3.34583e-19	8.76608e-15	8.54492e-15	1.32418e-17
Glyma.01G110100	7	0	0	0	6	5	6	6	6	6	0	0	1	3	3	0	6	0	0	1	0	6	5	4	6	5	1	1	0	1	83	3.65494e-19	9.57595e-15	9.33326e-15	1.43999e-17
Glyma.01G114300	6	0	1	0	4	7	5	7	7	7	0	0	1	0	5	0	7	1	0	0	0	4	5	1	6	5	5	0	0	1	83	3.65494e-19	9.57595e-15	9.33326e-15	1.43999e-17
Glyma.10G296900	18	0	9	0	9	0	0	9	18	9	0	9	18	0	9	0	18	0	0	9	0	18	0	9	9	0	0	0	0	27	144	3.64568e-19	9.55169e-15	9.31034e-15	1.43999e-17
Glyma.09G075300	15	0	0	0	5	0	0	10	10	10	0	0	0	0	0	0	0	0	0	0	0	10	5	0	5	5	0	5	0	0	80	3.7441e-19	9.80953e-15	9.55718e-15	1.45326e-17
Glyma.15G194800	4	0	0	0	16	0	0	4	18	4	0	10	22	4	10	0	20	6	0	4	0	16	2	4	10	16	16	0	0	32	154	3.70357e-19	9.70335e-15	9.45706e-15	1.45326e-17
Glyma.08G065400	0	0	0	0	10	0	0	0	10	0	0	0	0	10	10	0	0	10	0	10	0	10	0	10	0	0	0	0	0	0	80	3.7441e-19	9.80953e-15	9.55718e-15	1.45326e-17
Glyma.07G072500	0	0	0	0	0	0	0	16	0	16	0	0	0	0	0	0	8	8	0	0	0	0	8	0	8	8	8	0	0	0	80	3.7441e-19	9.80953e-15	9.55718e-15	1.45326e-17
Glyma.08G133200	0	0	0	0	0	0	0	24	0	24	0	0	0	0	0	0	8	0	0	0	0	0	0	0	24	0	0	0	0	0	80	3.7441e-19	9.80953e-15	9.55718e-15	1.45326e-17
Glyma.13G032500	0	0	0	0	0	0	0	12	12	12	0	0	0	0	0	0	0	0	0	0	0	12	0	4	8	12	8	0	0	0	80	3.7441e-19	9.80953e-15	9.55718e-15	1.45326e-17
Glyma.12G112750	0	0	0	0	0	0	0	0	0	0	0	0	0	0	0	0	10	0	0	5	0	20	0	0	30	15	0	0	0	0	80	3.7441e-19	9.80953e-15	9.55718e-15	1.45326e-17
Glyma.18G212100	0	0	0	0	0	0	0	0	0	0	0	0	0	0	0	0	16	0	0	0	0	0	0	0	0	32	16	16	0	0	80	3.7441e-19	9.80953e-15	9.55718e-15	1.45326e-17
Glyma.02G274500	10	0	0	0	10	0	0	0	10	0	0	0	0	0	0	0	0	0	0	10	0	10	0	10	10	0	10	0	0	0	80	3.7441e-19	9.80954e-15	9.55718e-15	1.45326e-17
Glyma.04G211000	10	0	0	0	15	0	0	10	10	10	0	5	25	5	0	5	10	5	0	0	0	20	10	5	20	10	5	0	0	30	150	3.7441e-19	9.80954e-15	9.55718e-15	1.45326e-17
Glyma.17G062700	0	0	16	0	24	0	0	24	24	24	24	0	24	0	24	0	0	0	0	0	0	24	0	0	24	0	0	0	0	48	184	4.30509e-19	1.12793e-14	1.09887e-14	1.66854e-17
Glyma.16G017700	6	0	6	0	6	0	0	6	6	6	0	6	6	3	0	6	6	6	6	6	0	6	6	6	6	6	6	6	0	12	111	4.39583e-19	1.15171e-14	1.12195e-14	1.69868e-17
Glyma.16G090700	13	0	0	0	7	0	0	6	12	6	0	0	12	0	6	0	12	0	0	2	0	5	7	0	12	11	6	6	0	12	111	4.39583e-19	1.15171e-14	1.12195e-14	1.69868e-17
Glyma.07G160700	8	0	0	0	0	0	0	16	16	16	0	0	16	4	4	0	16	0	0	0	0	8	4	0	16	8	4	0	0	16	120	4.751e-19	1.24476e-14	1.21255e-14	1.83323e-17
Glyma.11G200400	6	0	6	0	6	0	0	12	12	12	0	0	6	0	0	0	12	0	0	0	0	6	6	0	6	6	6	0	0	6	96	5.04249e-19	1.32113e-14	1.28674e-14	1.93431e-17
Glyma.15G230600	6	0	6	0	6	0	0	6	6	6	0	0	6	6	6	0	0	0	0	0	0	6	6	0	6	12	6	12	0	6	96	5.04249e-19	1.32113e-14	1.28674e-14	1.93431e-17
Glyma.16G189700	3	0	0	0	0	0	0	6	9	6	0	0	6	3	6	0	9	6	0	6	0	6	3	9	9	9	3	3	0	6	96	5.04249e-19	1.32113e-14	1.28674e-14	1.93431e-17
Glyma.17G189000	10	0	0	0	0	0	0	10	0	10	0	4	2	2	0	0	14	0	0	0	0	10	8	0	8	8	10	6	0	6	96	5.04249e-19	1.32113e-14	1.28674e-14	1.93431e-17
Glyma.03G059300	7	0	0	0	7	0	0	7	7	7	0	0	7	7	7	0	7	0	0	7	0	7	7	7	7	7	0	0	0	7	98	6.64465e-19	1.7409e-14	1.69545e-14	2.54146e-17
Glyma.06G223300	7	0	0	0	7	0	0	7	7	7	0	0	7	0	7	0	7	0	0	0	0	7	7	7	7	7	14	0	0	7	98	6.64465e-19	1.7409e-14	1.69545e-14	2.54146e-17
Glyma.18G156500	11	0	0	0	8	0	0	9	11	9	0	2	13	0	6	0	12	0	0	1	0	8	10	2	13	12	5	0	0	15	117	6.80974e-19	1.78415e-14	1.73751e-14	2.60081e-17
Glyma.10G098400	12	0	0	0	10	0	0	10	14	10	0	2	10	0	2	0	10	2	0	0	0	0	8	4	12	10	6	0	0	12	110	7.15199e-19	1.87382e-14	1.82476e-14	2.72754e-17
Glyma.01G067700	6	0	2	0	2	4	4	6	6	6	0	0	4	0	2	0	14	0	0	2	0	8	2	0	14	6	4	2	0	4	90	7.29998e-19	1.91259e-14	1.86237e-14	2.7759e-17
Glyma.15G187750	6	3	3	2	6	0	0	6	7	6	3	8	10	6	10	5	13	5	3	7	2	4	8	9	8	5	4	0	2	21	130	7.29529e-19	1.91137e-14	1.86125e-14	2.7759e-17
Glyma.13G009900	22	0	0	0	11	0	0	11	22	11	0	0	22	0	22	0	11	0	0	0	0	11	0	0	11	0	0	0	0	22	132	7.71573e-19	2.02152e-14	1.96828e-14	2.9255e-17
Glyma.04G200000	0	0	0	0	22	0	0	22	0	22	0	22	0	11	0	0	22	0	0	0	0	0	0	0	0	22	0	11	0	22	132	7.71573e-19	2.02152e-14	1.96828e-14	2.9255e-17
Glyma.20G031800	5	0	0	0	5	0	0	5	5	5	0	5	5	0	5	0	20	10	0	0	0	5	5	5	5	15	10	0	0	10	105	8.08835e-19	2.11915e-14	2.06326e-14	3.06235e-17
Glyma.06G221100	12	0	0	0	10	0	0	12	12	12	0	2	11	0	3	0	12	0	0	0	0	8	3	0	13	10	4	1	0	13	112	8.38121e-19	2.19588e-14	2.13788e-14	3.16865e-17
Glyma.15G230300	3	0	0	0	0	0	0	6	3	6	0	0	3	3	3	0	3	0	0	3	0	15	3	9	3	15	9	3	0	3	87	8.41522e-19	2.20479e-14	2.14638e-14	3.17236e-17
Glyma.04G099600	15	0	12	0	0	0	0	0	15	0	0	0	3	0	15	0	3	0	0	0	0	0	6	0	3	3	12	3	0	3	87	8.41522e-19	2.20479e-14	2.14639e-14	3.17236e-17
Glyma.02G159500	16	0	0	0	8	0	4	8	8	8	0	0	8	0	0	0	4	0	0	0	0	8	4	4	16	8	4	0	0	8	100	8.54239e-19	2.23811e-14	2.17857e-14	3.20646e-17
Glyma.05G034900	8	0	4	0	8	0	0	4	8	4	0	0	8	0	8	0	8	0	0	0	0	0	8	8	8	8	8	8	0	8	100	8.54239e-19	2.23811e-14	2.17857e-14	3.20646e-17
Glyma.05G210100	8	0	4	0	8	0	0	4	8	4	0	0	8	4	8	0	0	0	0	0	0	8	8	4	8	8	8	8	0	8	100	8.54239e-19	2.23811e-14	2.17857e-14	3.20646e-17
Glyma.13G121900	16	0	16	0	0	0	0	16	0	16	0	16	16	0	16	0	16	8	0	0	0	16	0	16	0	0	16	0	0	32	152	9.02929e-19	2.36567e-14	2.30256e-14	3.37953e-17
Glyma.18G105800	12	0	0	0	12	0	0	20	20	20	0	12	20	4	12	0	0	4	0	4	0	0	8	0	16	12	8	0	0	32	152	9.02929e-19	2.36567e-14	2.30256e-14	3.37953e-17
Glyma.16G064800	12	0	0	0	4	0	0	10	10	10	0	0	0	0	4	0	12	0	0	2	0	2	0	0	12	0	0	0	0	0	78	1.03041e-18	2.69966e-14	2.62743e-14	3.84567e-17
Glyma.06G284801	6	0	0	0	6	0	0	8	6	8	0	0	0	4	6	0	0	0	0	6	0	6	6	2	8	6	0	0	0	0	78	1.03041e-18	2.69966e-14	2.62743e-14	3.84567e-17
Glyma.03G050500	6	0	0	0	6	0	0	6	9	6	0	3	6	3	6	0	12	0	0	0	0	6	3	0	6	15	9	9	0	9	102	1.07358e-18	2.81278e-14	2.7372e-14	3.98976e-17
Glyma.15G127700	9	0	0	0	0	0	0	9	9	9	0	0	9	0	9	0	9	0	0	0	0	9	6	9	6	9	9	0	0	9	102	1.07358e-18	2.81278e-14	2.7372e-14	3.98977e-17
Glyma.17G203800	9	0	0	0	0	0	0	15	6	15	0	0	9	0	3	0	18	0	0	0	0	12	0	3	9	6	0	6	0	9	102	1.07358e-18	2.81278e-14	2.7372e-14	3.98977e-17
Glyma.07G088200	7	0	4	0	9	0	0	9	7	9	0	3	9	2	9	0	8	5	0	3	0	7	0	6	11	8	5	0	0	12	109	1.16333e-18	3.04793e-14	2.96592e-14	4.31718e-17
Glyma.18G144700	8	0	2	0	6	0	0	10	8	10	0	0	10	0	4	0	8	0	0	0	0	12	4	4	12	12	4	0	0	10	104	1.32134e-18	3.46192e-14	3.36863e-14	4.89663e-17
Glyma.18G158900	14	0	0	0	6	0	0	6	11	6	0	0	14	0	4	0	14	0	0	2	0	7	10	0	11	12	10	0	0	14	113	1.56602e-18	4.10297e-14	3.99225e-14	5.79516e-17
Glyma.12G213100	0	0	0	0	0	0	0	0	11	0	0	0	0	0	22	0	0	0	0	0	0	0	0	0	0	22	22	0	0	0	77	1.70958e-18	4.4791e-14	4.35806e-14	6.31749e-17
Glyma.04G158900	10	0	0	0	5	0	0	10	10	10	0	5	10	0	5	0	15	0	0	0	0	10	5	0	10	15	5	5	0	15	115	1.77748e-18	4.657e-14	4.5308e-14	6.54993e-17
Glyma.19G069200	13	0	1	0	2	0	0	3	13	3	0	1	14	0	7	0	14	0	0	1	1	8	11	1	13	14	8	2	0	15	115	1.77748e-18	4.657e-14	4.5308e-14	6.54993e-17
Glyma.08G354500	24	0	0	0	12	0	0	0	0	0	0	0	12	0	0	0	12	0	0	12	0	12	0	0	12	12	12	0	0	12	108	1.89178e-18	4.95645e-14	4.82138e-14	6.9321e-17
Glyma.16G038300	0	0	12	0	0	0	0	0	0	0	0	0	12	12	0	0	12	0	0	0	0	0	12	12	12	12	12	12	0	12	108	1.89178e-18	4.95645e-14	4.82138e-14	6.9321e-17
Glyma.03G060000	4	0	8	0	8	0	0	8	12	8	0	4	8	0	8	0	8	0	0	4	0	4	4	4	12	8	8	0	0	12	108	1.89178e-18	4.95645e-14	4.82138e-14	6.9321e-17
Glyma.06G320100	6	0	0	0	6	0	0	0	6	0	0	6	6	6	6	6	6	0	0	0	0	6	6	6	12	12	12	12	0	12	108	1.89178e-18	4.95645e-14	4.82138e-14	6.9321e-17
Glyma.02G188200	8	0	0	0	2	0	6	10	10	10	0	0	4	2	2	0	4	0	0	0	0	2	4	2	8	10	8	0	0	4	88	1.99442e-18	5.22538e-14	5.08158e-14	7.23737e-17
Glyma.02G190600	2	0	0	0	8	0	2	12	12	12	0	0	4	0	2	0	4	0	0	0	0	10	0	0	2	12	10	0	0	4	88	1.99442e-18	5.22538e-14	5.08158e-14	7.23737e-17
Glyma.04G191200	8	0	0	0	8	0	0	8	12	8	0	4	0	0	0	0	4	0	0	8	0	8	0	4	8	12	0	0	0	4	88	1.99442e-18	5.22538e-14	5.08158e-14	7.23737e-17
Glyma.08G295900	8	0	4	0	8	0	0	8	8	8	0	0	4	0	4	0	0	0	0	0	0	8	4	0	8	12	8	0	0	4	88	1.99442e-18	5.22538e-14	5.08158e-14	7.23737e-17
Glyma.10G215100	4	0	0	0	0	0	0	4	8	4	0	0	4	4	4	0	8	0	0	4	0	8	0	8	8	8	8	8	0	4	88	1.99442e-18	5.22538e-14	5.08158e-14	7.23737e-17
Glyma.13G043000	8	0	0	0	4	0	0	16	4	16	0	0	4	8	0	0	4	0	0	4	0	4	4	0	8	4	4	0	0	4	88	1.99442e-18	5.22538e-14	5.08158e-14	7.23737e-17
Glyma.16G076100	4	0	0	0	8	0	0	12	12	12	0	0	4	4	0	0	8	0	0	0	0	4	0	4	4	8	8	0	0	4	88	1.99442e-18	5.22538e-14	5.08158e-14	7.23737e-17
Glyma.03G070400	10	0	0	0	5	0	0	10	11	10	0	0	10	0	7	0	13	0	0	1	0	4	4	1	10	12	5	0	0	10	103	2.15817e-18	5.6544e-14	5.49858e-14	7.82075e-17
Glyma.09G091100	0	0	0	0	9	0	0	15	12	15	0	6	0	3	0	0	0	0	0	3	0	12	0	9	15	0	0	0	0	6	93	2.2534e-18	5.90392e-14	5.741e-14	8.15458e-17
Glyma.15G166200	6	0	0	0	4	0	0	8	8	8	0	2	6	0	6	0	6	0	0	0	0	8	8	4	10	8	8	6	0	8	98	2.29887e-18	6.02305e-14	5.85661e-14	8.30766e-17
Glyma.15G038400	14	0	0	0	0	0	0	7	14	7	0	0	14	0	7	0	14	0	0	0	0	7	0	0	14	14	7	7	0	14	112	2.53473e-18	6.641e-14	6.45672e-14	9.12225e-17
Glyma.17G189600	12	0	0	0	2	0	0	22	2	22	0	0	14	0	0	0	8	0	0	0	0	8	0	0	20	14	0	2	0	14	112	2.53473e-18	6.641e-14	6.45672e-14	9.12225e-17
Glyma.07G126200	7	0	7	0	7	0	0	7	7	7	0	7	7	0	7	0	7	7	0	0	0	7	7	7	7	7	7	7	0	14	112	2.53473e-18	6.641e-14	6.45672e-14	9.12225e-17
Glyma.17G191300	10	0	0	0	0	0	0	10	5	10	0	0	5	0	0	0	15	0	0	0	0	15	0	0	10	10	5	0	0	5	90	2.76204e-18	7.23654e-14	7.03547e-14	9.92667e-17
Glyma.05G196100	8	0	4	0	8	0	0	0	0	0	0	0	0	0	0	0	8	0	0	0	4	8	4	8	8	8	8	0	0	0	76	2.83665e-18	7.43202e-14	7.22494e-14	1.01669e-16
Glyma.10G168700	4	0	0	0	4	0	0	4	4	4	0	0	0	4	0	0	4	8	0	0	0	0	4	4	8	8	8	8	0	0	76	2.83665e-18	7.43202e-14	7.22494e-14	1.01669e-16
Glyma.19G057200	12	0	2	0	2	0	0	13	11	13	0	1	11	0	4	0	14	0	0	1	0	5	8	1	8	8	5	0	0	12	107	3.07554e-18	8.05791e-14	7.83278e-14	1.09931e-16
Glyma.02G161100	19	0	0	0	4	0	8	11	8	11	0	2	10	1	1	0	10	0	0	0	0	5	2	0	16	8	3	0	0	12	107	3.07554e-18	8.05791e-14	7.83278e-14	1.09931e-16
Glyma.20G069300	12	0	6	0	8	0	0	2	10	2	0	4	6	0	0	0	12	0	0	0	0	8	8	4	12	12	6	0	0	10	102	3.52424e-18	9.23352e-14	8.97519e-14	1.25797e-16
Glyma.03G057100	11	0	0	0	5	0	0	10	10	10	0	3	10	0	4	0	14	2	0	3	1	9	3	2	11	7	4	2	1	13	109	3.57901e-18	9.37699e-14	9.11429e-14	1.27578e-16
Glyma.11G145018	3	0	0	0	9	0	0	3	3	3	0	0	3	3	3	0	6	0	3	3	0	9	3	3	3	12	3	9	3	3	84	3.81714e-18	1.00009e-13	9.72035e-14	1.35882e-16
Glyma.03G073780	14	0	0	0	6	0	0	13	12	13	0	1	17	0	5	0	14	1	0	0	0	8	6	2	10	10	5	1	0	18	120	3.86087e-18	1.01155e-13	9.83092e-14	1.37066e-16
Glyma.06G083000	6	0	0	0	6	0	0	6	6	6	0	12	6	6	6	0	12	6	0	6	0	6	6	18	6	6	6	6	0	18	120	3.86087e-18	1.01155e-13	9.83092e-14	1.37066e-16
Glyma.06G218900	16	0	0	0	2	0	0	14	12	14	0	2	18	0	0	0	16	0	0	0	0	8	8	0	14	14	6	0	0	20	124	4.44955e-18	1.16578e-13	1.13294e-13	1.57751e-16
Glyma.09G051400	5	0	0	0	5	0	0	5	5	5	0	0	0	0	0	5	5	0	0	5	0	5	5	5	5	5	5	5	0	0	75	4.70714e-18	1.23327e-13	1.19839e-13	1.66209e-16
Glyma.18G057400	9	0	6	0	0	0	0	9	9	9	0	9	0	0	0	0	9	3	0	0	0	9	3	6	9	9	9	0	0	9	99	4.70714e-18	1.23327e-13	1.19839e-13	1.66209e-16
Glyma.05G025600	0	0	0	0	9	0	0	0	0	0	0	0	0	0	0	0	12	0	0	0	0	12	9	0	12	12	9	0	0	0	75	4.70714e-18	1.23327e-13	1.19839e-13	1.66209e-16
Glyma.09G073600	12	0	0	0	24	0	0	0	0	0	0	24	0	0	0	0	0	0	0	0	0	36	0	12	24	24	0	0	0	24	132	5.29079e-18	1.38619e-13	1.34693e-13	1.86566e-16
Glyma.16G068100	4	0	0	0	8	0	0	8	8	8	0	4	0	0	8	0	2	4	0	6	0	8	0	8	8	6	0	0	0	4	86	5.44886e-18	1.4276e-13	1.38712e-13	1.91882e-16
Glyma.13G153018	14	0	0	0	7	0	0	14	7	14	0	14	14	14	7	0	7	7	0	7	0	14	7	7	7	0	0	7	0	28	140	5.57292e-18	1.4601e-13	1.41859e-13	1.95724e-16
Glyma.06G164300	28	0	14	0	0	0	0	0	28	0	0	28	0	0	0	0	28	0	0	14	0	28	0	0	0	0	0	0	0	28	140	5.57292e-18	1.4601e-13	1.41859e-13	1.95724e-16
Glyma.18G168400	11	0	0	0	2	0	0	9	8	9	1	0	12	0	3	0	9	0	0	3	0	9	3	11	10	11	8	2	0	13	108	5.80306e-18	1.5204e-13	1.47705e-13	2.03262e-16
Glyma.06G221600	11	0	0	0	7	0	0	12	10	12	0	0	13	1	5	0	9	0	0	6	0	5	6	0	10	9	3	2	0	13	108	5.80306e-18	1.5204e-13	1.47705e-13	2.03262e-16
Glyma.01G081500	8	0	8	0	8	4	4	8	8	8	0	4	4	0	4	0	4	0	0	0	4	8	0	4	4	4	4	4	0	8	96	6.18312e-18	1.61998e-13	1.57336e-13	2.14567e-16
Glyma.03G016900	8	0	0	0	4	0	0	8	4	8	0	0	8	4	4	0	8	4	0	4	0	4	8	4	8	4	8	4	0	8	96	6.18312e-18	1.61998e-13	1.57336e-13	2.14567e-16
Glyma.03G148200	8	0	0	0	8	0	0	8	8	8	0	0	8	0	8	0	8	0	0	0	0	8	8	8	8	8	0	0	0	8	96	6.18312e-18	1.61998e-13	1.57336e-13	2.14567e-16
Glyma.18G041200	8	0	0	0	8	0	0	8	8	8	0	0	8	0	4	0	8	0	0	4	0	8	8	0	8	4	8	4	0	8	96	6.18312e-18	1.61998e-13	1.57336e-13	2.14567e-16
Glyma.20G011800	8	0	0	0	8	0	0	8	8	8	0	0	8	0	8	0	8	0	0	0	0	8	8	0	8	8	8	0	0	8	96	6.18312e-18	1.61998e-13	1.57336e-13	2.14567e-16
Glyma.07G199000	0	0	0	0	8	0	0	12	12	12	0	8	0	4	0	0	8	12	8	0	0	12	0	0	8	0	0	0	0	8	96	6.18312e-18	1.61998e-13	1.57336e-13	2.14567e-16
Glyma.14G118200	0	0	0	0	0	0	0	0	32	0	0	8	0	8	12	0	36	0	0	0	0	0	0	4	4	0	0	0	0	8	96	6.18312e-18	1.61998e-13	1.57336e-13	2.14567e-16
Glyma.01G080600	10	0	0	0	4	6	6	10	10	10	0	0	14	2	4	0	16	0	0	0	2	4	4	2	8	6	4	2	0	14	110	6.63403e-18	1.73812e-13	1.68796e-13	2.29606e-16
Glyma.04G149500	12	0	0	0	6	0	0	8	12	8	0	2	12	0	10	0	10	0	0	2	0	6	10	0	12	6	8	0	0	14	110	6.63403e-18	1.73812e-13	1.68796e-13	2.29606e-16
Glyma.02G171900	12	0	2	0	6	0	4	8	6	8	0	0	2	0	0	0	4	2	0	0	0	4	4	2	8	6	4	0	0	2	80	7.07649e-18	1.85404e-13	1.80047e-13	2.44597e-16
Glyma.19G069800	18	0	1	0	0	0	0	0	17	0	0	1	19	0	7	0	18	0	0	3	0	7	10	0	20	19	2	1	0	20	123	7.09915e-18	1.85998e-13	1.80617e-13	2.45056e-16
Glyma.06G277200	6	0	2	0	4	0	0	6	6	6	0	0	0	4	6	0	8	2	0	0	0	4	0	4	8	6	2	0	0	0	74	7.8117e-18	2.04667e-13	1.98738e-13	2.69298e-16
Glyma.19G016300	6	3	3	3	6	0	0	6	6	6	3	3	6	3	6	3	6	6	3	6	3	6	3	6	3	3	3	3	3	12	105	8.12212e-18	2.128e-13	2.06627e-13	2.79631e-16
Glyma.03G180600	10	0	0	0	10	0	0	10	0	10	0	10	0	0	0	10	10	0	0	0	0	10	0	0	10	10	10	0	0	10	100	9.39184e-18	2.46066e-13	2.38872e-13	3.20817e-16
Glyma.04G143200	5	1	0	0	3	0	0	5	22	5	1	2	7	1	1	0	24	0	0	1	0	3	5	1	16	5	0	2	0	10	100	9.39184e-18	2.46066e-13	2.38872e-13	3.20817e-16
Glyma.10G086800	10	0	0	0	10	0	0	10	0	10	0	10	0	0	0	0	10	0	0	0	0	10	5	5	15	10	5	0	0	10	100	9.39184e-18	2.46066e-13	2.38872e-13	3.20817e-16
Glyma.11G248700	10	0	0	0	5	0	0	5	5	5	0	5	5	0	5	0	10	10	0	5	0	5	5	5	5	10	10	0	0	10	100	9.39184e-18	2.46066e-13	2.38872e-13	3.20817e-16
Glyma.13G118400	10	0	10	0	0	0	0	10	0	10	0	0	10	0	10	0	10	0	0	0	0	10	0	10	10	0	10	0	0	10	100	9.39184e-18	2.46066e-13	2.38872e-13	3.20817e-16
Glyma.20G034000	0	0	0	0	0	0	0	0	0	0	0	10	0	0	0	0	20	5	0	0	0	0	10	0	10	20	20	15	0	10	100	9.39184e-18	2.46066e-13	2.38872e-13	3.20817e-16
Glyma.10G179500	6	0	3	0	6	0	0	6	6	6	0	0	6	3	3	3	6	3	3	0	0	6	3	3	6	6	6	6	0	6	90	1.00636e-17	2.63667e-13	2.55938e-13	3.4287e-16
Glyma.06G296200	9	0	9	0	0	0	0	0	0	0	0	6	0	0	0	0	9	6	0	6	0	0	6	12	9	9	9	6	0	6	90	1.00636e-17	2.63667e-13	2.55938e-13	3.4287e-16
Glyma.18G145300	15	0	0	0	9	0	0	6	12	6	0	0	14	0	5	0	12	0	0	1	0	2	5	1	13	13	6	3	0	14	109	1.07271e-17	2.81049e-13	2.728e-13	3.64999e-16
Glyma.14G138200	10	0	0	0	8	0	0	16	16	16	0	0	20	2	2	0	16	0	0	2	0	2	4	0	16	8	2	2	0	20	122	1.13211e-17	2.96612e-13	2.87895e-13	3.84711e-16
Glyma.03G067800	10	0	0	0	9	0	0	10	9	10	0	1	11	0	3	0	8	0	0	1	0	8	7	2	10	11	4	2	0	12	104	1.31935e-17	3.4567e-13	3.35484e-13	4.47179e-16
Glyma.09G147000	12	0	0	0	4	0	0	12	12	12	0	0	12	0	4	0	12	0	0	0	0	4	8	0	12	12	0	0	0	12	104	1.31935e-17	3.45669e-13	3.35484e-13	4.47179e-16
Glyma.01G121209	2	0	0	0	1	8	9	10	11	10	0	0	4	0	0	0	12	1	0	2	0	1	2	2	9	2	1	1	0	4	84	1.48863e-17	3.9002e-13	3.78483e-13	5.02603e-16
Glyma.03G052800	4	0	0	0	4	0	0	4	2	4	0	0	4	2	4	0	4	0	0	2	0	4	2	2	20	10	12	4	0	4	84	1.48863e-17	3.9002e-13	3.78483e-13	5.02603e-16
Glyma.16G064900	9	0	0	0	7	0	0	11	10	11	0	2	2	6	3	0	14	0	1	1	0	3	1	0	5	2	0	0	0	4	84	1.48863e-17	3.9002e-13	3.78483e-13	5.02603e-16
Glyma.18G065600	6	0	0	0	6	0	0	12	9	12	0	3	15	3	0	0	12	0	0	0	0	9	9	9	12	12	6	0	0	18	117	1.58779e-17	4.16001e-13	4.03664e-13	5.34706e-16
Glyma.06G256000	0	0	0	0	18	0	0	18	18	18	0	0	18	0	0	0	0	9	0	0	0	0	0	0	0	0	36	0	0	18	117	1.58779e-17	4.16001e-13	4.03664e-13	5.34706e-16
Glyma.06G227200	10	0	0	0	4	0	0	10	10	10	0	0	8	0	4	0	8	0	0	0	0	10	4	0	10	10	2	2	0	8	94	1.66204e-17	4.35455e-13	4.22524e-13	5.58992e-16
Glyma.14G162700	9	0	0	0	2	0	0	12	9	12	0	0	11	1	5	0	11	0	0	2	0	10	1	1	9	8	3	6	0	11	101	1.82851e-17	4.7907e-13	4.64826e-13	6.14192e-16
Glyma.06G203300	10	0	0	0	2	0	0	2	10	2	0	0	2	0	6	0	8	0	0	0	0	10	2	4	8	6	6	2	0	2	78	1.94456e-17	5.09474e-13	4.94287e-13	6.51501e-16
Glyma.16G094900	18	0	0	0	3	0	0	18	18	18	0	0	33	0	0	0	24	0	0	0	0	9	0	0	18	15	6	0	0	33	147	1.94456e-17	5.09474e-13	4.94287e-13	6.51501e-16
Glyma.06G200000	9	0	0	0	6	0	0	6	9	6	0	3	6	0	9	0	9	0	0	0	0	6	9	6	6	6	6	3	0	9	96	2.0605e-17	5.39851e-13	5.23717e-13	6.88586e-16
Glyma.14G211800	12	0	0	0	12	0	0	6	6	6	0	3	6	3	6	0	6	0	0	0	0	12	6	3	6	6	3	3	0	9	96	2.0605e-17	5.39851e-13	5.23717e-13	6.88586e-16
Glyma.16G164800	12	0	0	0	15	0	0	9	9	9	0	12	12	3	6	0	9	0	0	3	0	12	3	6	12	12	9	0	0	24	129	2.08877e-17	5.47258e-13	5.30882e-13	6.97144e-16
Glyma.09G081600	7	0	7	0	7	0	0	7	7	7	0	0	7	0	7	0	0	0	0	0	0	7	0	7	14	7	7	0	0	7	91	2.15197e-17	5.63817e-13	5.46644e-13	7.05653e-16
Glyma.09G088700	7	0	0	0	7	0	0	14	7	14	0	0	7	0	0	0	7	0	0	0	0	7	0	0	14	7	0	7	0	7	91	2.15197e-17	5.63817e-13	5.46644e-13	7.05653e-16
Glyma.09G143700	4	0	0	0	4	0	0	12	4	12	0	0	0	0	0	0	0	4	0	0	0	4	0	4	12	4	4	4	0	0	72	2.15197e-17	5.63817e-13	5.46644e-13	7.05653e-16
Glyma.10G220000	12	0	0	0	0	0	0	0	0	0	0	0	0	0	0	0	12	0	0	0	0	0	12	0	12	12	12	0	0	0	72	2.15197e-17	5.63817e-13	5.46644e-13	7.05653e-16
Glyma.15G167100	16	0	0	0	0	0	0	0	16	0	0	0	16	0	16	0	0	0	0	0	0	16	0	8	16	16	8	0	0	16	112	2.15197e-17	5.63817e-13	5.46644e-13	7.05653e-16
Glyma.20G118700	24	0	0	0	24	0	0	0	0	0	0	0	0	0	0	0	0	0	0	0	0	0	0	0	0	24	0	0	0	0	72	2.15197e-17	5.63817e-13	5.46644e-13	7.05653e-16
Glyma.17G003100	0	0	0	0	16	0	0	16	0	16	0	0	16	0	8	0	0	0	0	8	0	0	0	24	16	0	8	0	0	16	112	2.15197e-17	5.63817e-13	5.46644e-13	7.05653e-16
Glyma.19G246000	0	0	0	0	8	0	0	8	8	8	0	0	0	8	0	0	0	0	0	8	0	0	0	8	0	8	8	0	0	0	72	2.15197e-17	5.63817e-13	5.46644e-13	7.05653e-16
Glyma.08G234200	0	0	0	0	0	0	0	8	8	8	0	0	0	4	4	0	8	4	0	0	0	0	0	8	0	8	8	4	0	0	72	2.15197e-17	5.63817e-13	5.46644e-13	7.05653e-16
Glyma.02G071500	0	0	0	0	0	0	0	0	18	0	0	0	0	0	0	0	18	0	0	0	0	0	0	0	6	18	12	0	0	0	72	2.15197e-17	5.63817e-13	5.46644e-13	7.05653e-16
Glyma.01G118350	4	0	0	0	4	0	8	0	0	0	0	0	0	0	4	0	8	0	0	0	0	8	8	8	8	8	4	0	0	0	72	2.15197e-17	5.63817e-13	5.46644e-13	7.05653e-16
Glyma.01G223400	7	0	0	0	0	0	7	7	7	7	0	7	0	0	0	0	7	0	0	7	0	0	7	7	7	7	7	7	0	7	91	2.15197e-17	5.63817e-13	5.46644e-13	7.05653e-16
Glyma.03G068300	12	0	0	0	8	0	0	12	12	12	0	4	12	0	0	0	8	0	0	4	0	4	8	0	12	8	8	4	0	16	112	2.15197e-17	5.63817e-13	5.46644e-13	7.05653e-16
Glyma.06G016000	8	0	0	0	8	0	0	0	0	0	0	0	0	8	0	0	0	0	0	0	0	8	8	8	8	8	8	0	0	0	72	2.15197e-17	5.63817e-13	5.46644e-13	7.05653e-16
Glyma.12G109600	6	0	2	0	2	0	0	8	8	8	0	2	8	0	2	0	18	0	0	0	0	12	4	2	6	10	10	0	0	10	98	2.50063e-17	6.55164e-13	6.35184e-13	8.18956e-16
Glyma.18G156900	20	0	0	0	8	0	0	4	24	4	0	4	32	0	4	0	28	0	0	0	0	8	4	8	16	12	8	4	0	36	152	2.66989e-17	6.99512e-13	6.78153e-13	8.73298e-16
Glyma.01G091800	7	0	1	0	6	4	6	2	6	2	0	1	2	1	6	0	8	1	0	1	0	2	4	4	6	7	5	1	0	3	80	2.86728e-17	7.51227e-13	7.2826e-13	9.34485e-16
Glyma.06G260700	20	0	0	0	0	0	0	20	20	20	0	0	20	0	0	0	0	0	0	0	0	0	0	0	20	20	0	0	0	20	120	2.87479e-17	7.53195e-13	7.30053e-13	9.34485e-16
Glyma.12G133300	10	0	0	0	10	0	0	8	10	8	0	4	16	0	10	0	14	0	0	6	0	10	2	6	12	10	2	2	0	20	120	2.87479e-17	7.53195e-13	7.30053e-13	9.34485e-16
Glyma.12G156900	12	0	0	0	4	0	0	24	4	24	0	0	20	0	4	0	12	0	0	0	0	8	4	0	8	8	4	4	0	20	120	2.87479e-17	7.53195e-13	7.30053e-13	9.34485e-16
Glyma.18G070900	5	0	0	0	10	0	0	5	10	5	0	5	15	0	5	0	10	15	0	10	0	5	5	5	15	10	5	0	0	20	120	2.87479e-17	7.53195e-13	7.30053e-13	9.34485e-16
Glyma.15G194200	0	0	0	0	15	0	0	0	30	0	0	0	30	20	30	0	10	0	0	0	0	0	0	10	5	10	5	5	0	30	140	3.26661e-17	8.55851e-13	8.29522e-13	1.06053e-15
Glyma.08G317400	15	0	0	0	0	0	0	5	0	5	0	0	5	0	0	0	15	0	5	0	0	0	0	0	15	15	10	0	0	5	85	3.37663e-17	8.84677e-13	8.57394e-13	1.09354e-15
Glyma.14G174500	5	0	0	0	5	0	0	5	5	5	0	0	5	0	0	0	5	0	0	0	0	15	0	0	15	15	10	0	0	5	85	3.37663e-17	8.84677e-13	8.57394e-13	1.09354e-15
Glyma.09G180200	6	0	6	0	6	0	0	6	6	6	0	6	6	6	6	0	6	0	0	6	0	6	6	6	6	6	6	6	0	12	102	3.47821e-17	9.11292e-13	8.83118e-13	1.12367e-15
Glyma.13G148100	6	0	6	0	6	0	0	6	6	6	0	6	6	0	6	0	12	0	0	6	0	6	6	6	6	6	12	0	0	12	102	3.47821e-17	9.11292e-13	8.83118e-13	1.12367e-15
Glyma.16G138300	13	0	0	0	13	0	0	13	13	13	0	0	13	0	13	0	0	0	0	0	0	13	0	13	0	0	0	0	0	13	104	3.99815e-17	1.04752e-12	1.01509e-12	1.29004e-15
Glyma.03G023500	0	0	0	0	4	0	0	8	8	8	0	4	4	0	0	0	8	4	2	4	0	4	6	6	8	8	8	6	0	8	92	4.46479e-17	1.16977e-12	1.13352e-12	1.43884e-15
Glyma.01G097200	9	0	0	0	6	6	6	6	9	6	0	0	6	0	3	0	12	0	0	0	0	0	6	0	12	6	0	0	0	6	87	4.49115e-17	1.17668e-12	1.14017e-12	1.44555e-15
Glyma.19G140700	0	0	0	0	8	0	0	8	8	8	2	2	10	4	8	0	8	0	0	2	0	10	2	8	6	10	8	8	0	14	106	4.52555e-17	1.18569e-12	1.14886e-12	1.45484e-15
Glyma.18G126000	18	0	0	0	0	0	0	18	15	18	0	0	15	0	6	0	15	0	0	0	0	0	3	0	12	3	0	0	0	15	108	5.04987e-17	1.32307e-12	1.28186e-12	1.61942e-15
Glyma.18G140700	15	0	0	0	3	0	0	9	9	9	0	3	12	3	3	0	12	0	0	0	0	9	6	3	9	9	6	3	0	15	108	5.04987e-17	1.32307e-12	1.28186e-12	1.61942e-15
Glyma.10G083500	6	0	0	0	5	0	0	10	2	10	0	0	2	0	0	0	9	0	0	2	0	5	7	0	4	8	6	2	0	2	76	5.34473e-17	1.40032e-12	1.3566e-12	1.70979e-15
Glyma.03G034900	0	0	0	0	0	0	0	12	0	12	0	0	2	0	0	0	20	2	0	0	0	0	2	14	10	4	0	0	0	2	76	5.34473e-17	1.40032e-12	1.3566e-12	1.70979e-15
Glyma.02G090100	10	0	10	0	0	0	10	0	0	0	0	0	0	0	0	0	0	0	0	10	0	0	0	0	10	10	10	0	0	0	70	5.93045e-17	1.55378e-12	1.50503e-12	1.88794e-15
Glyma.08G057400	5	0	0	0	0	0	0	5	5	5	0	0	0	5	5	0	5	0	0	5	0	5	5	5	5	5	0	5	0	0	70	5.93045e-17	1.55378e-12	1.50503e-12	1.88794e-15
Glyma.11G121400	14	0	0	0	0	0	0	0	0	0	0	0	0	0	0	0	7	0	0	0	0	0	0	0	14	14	14	7	0	0	70	5.93045e-17	1.55378e-12	1.50503e-12	1.88794e-15
Glyma.20G234500	10	0	0	0	10	0	0	0	0	0	0	0	0	0	0	0	10	0	0	0	0	0	10	0	10	10	10	0	0	0	70	5.93045e-17	1.55378e-12	1.50503e-12	1.88794e-15
Glyma.10G102300	10	1	0	0	7	0	0	12	14	12	1	0	12	1	5	0	10	0	0	1	0	3	5	0	10	8	4	0	0	13	103	6.47214e-17	1.6957e-12	1.64231e-12	2.05291e-15
Glyma.12G141700	5	0	4	0	10	0	0	4	10	4	0	3	10	2	6	1	13	0	0	3	0	9	8	3	10	5	4	2	0	13	103	6.47214e-17	1.6957e-12	1.64231e-12	2.05291e-15
Glyma.15G208300	9	0	1	5	5	0	0	7	13	7	1	1	11	1	5	0	14	3	0	2	0	1	8	3	8	6	3	2	0	13	103	6.47214e-17	1.6957e-12	1.64231e-12	2.05291e-15
Glyma.15G223200	12	0	6	0	12	0	0	6	12	6	0	6	12	0	12	0	12	0	0	0	0	6	6	0	12	6	6	0	0	18	114	6.50307e-17	1.7038e-12	1.65002e-12	2.05773e-15
Glyma.06G205701	12	0	0	0	9	0	0	12	12	12	0	3	15	0	3	0	12	0	0	0	0	9	0	0	12	12	6	3	0	18	114	6.50307e-17	1.7038e-12	1.65002e-12	2.05773e-15
Glyma.15G214500	14	0	0	0	7	0	0	14	14	14	0	0	42	0	7	0	35	0	0	0	0	21	0	0	14	14	0	7	0	42	161	6.70243e-17	1.75604e-12	1.70054e-12	2.11826e-15
Glyma.06G221900	10	0	0	0	8	0	0	10	10	10	0	0	20	2	2	0	14	0	0	0	0	10	10	2	10	10	10	0	0	20	118	7.28507e-17	1.90869e-12	1.8483e-12	2.29962e-15
Glyma.03G247100	7	0	0	0	7	0	0	7	7	7	0	7	7	7	7	0	7	0	0	0	0	7	7	7	7	7	7	7	0	14	105	7.30714e-17	1.91447e-12	1.85382e-12	2.30382e-15
Glyma.14G211900	6	0	4	0	6	0	0	6	4	6	0	2	4	4	6	0	6	2	0	0	0	6	6	6	6	4	4	4	0	6	86	7.39292e-17	1.93694e-12	1.87543e-12	2.32526e-15
Glyma.02G111800	10	0	0	0	0	0	4	12	6	12	0	2	4	0	4	0	8	0	0	0	0	4	2	4	12	4	2	2	0	6	86	7.39292e-17	1.93694e-12	1.87544e-12	2.32526e-15
Glyma.08G137500	6	0	3	0	9	0	0	6	3	6	0	0	3	0	3	0	3	6	0	0	0	6	3	3	6	6	6	3	0	3	78	7.85975e-17	2.05925e-12	1.99378e-12	2.46913e-15
Glyma.14G159800	9	0	0	0	3	0	0	15	30	15	0	6	21	0	6	0	42	0	0	0	0	0	0	6	3	3	0	0	0	27	132	8.28876e-17	2.17165e-12	2.10244e-12	2.59767e-15
Glyma.15G219300	3	0	0	0	12	0	0	3	18	3	0	3	24	0	15	0	21	0	0	3	0	18	3	0	9	15	9	0	0	27	132	8.28876e-17	2.17165e-12	2.10244e-12	2.59767e-15
Glyma.09G196900	6	0	6	0	6	0	0	6	6	6	0	3	6	6	6	0	6	0	0	3	0	6	6	6	6	6	6	0	0	9	93	9.00358e-17	2.35894e-12	2.28367e-12	2.81832e-15
Glyma.16G214900	4	0	0	4	16	0	0	4	12	4	0	12	0	0	0	0	4	0	0	0	0	0	4	8	24	16	0	0	0	12	100	9.15834e-17	2.39949e-12	2.32265e-12	2.85653e-15
Glyma.18G134100	9	0	0	0	8	0	0	6	8	6	0	3	9	1	5	0	11	1	0	0	0	7	6	7	9	8	7	1	0	12	100	9.15834e-17	2.39949e-12	2.32265e-12	2.85653e-15
Glyma.06G232600	16	0	0	0	4	0	0	8	8	8	0	0	12	0	4	0	12	0	0	0	0	8	4	0	12	12	4	0	0	12	100	9.15835e-17	2.39949e-12	2.32265e-12	2.85653e-15
Glyma.01G114600	8	0	1	0	5	5	5	6	6	6	0	0	1	0	4	0	6	0	0	0	0	4	0	0	7	5	3	1	0	1	72	9.57654e-17	2.50905e-12	2.42861e-12	2.98342e-15
Glyma.09G149000	3	0	3	0	3	0	0	9	12	9	0	0	0	3	0	0	0	0	0	0	0	3	3	3	9	3	3	3	0	0	69	9.84634e-17	2.57974e-12	2.49693e-12	3.06383e-15
Glyma.03G074000	11	0	0	0	3	0	0	11	10	11	0	2	11	1	4	0	13	0	0	0	0	7	3	2	10	8	5	3	0	13	102	1.04733e-16	2.744e-12	2.65571e-12	3.25119e-15
Glyma.05G092800	13	0	0	0	5	0	0	14	9	14	0	0	13	0	3	0	14	0	0	2	0	2	5	0	10	8	3	0	0	13	102	1.04733e-16	2.744e-12	2.65571e-12	3.25119e-15
Glyma.15G151000	10	0	10	0	10	0	0	0	5	0	0	0	10	0	5	0	5	0	0	5	0	5	5	10	5	10	10	0	0	10	95	1.08448e-16	2.84133e-12	2.74958e-12	3.35458e-15
Glyma.18G178300	7	0	0	0	3	0	0	10	10	10	0	3	7	1	1	0	7	0	0	1	0	5	5	4	10	10	10	1	0	10	95	1.08448e-16	2.84133e-12	2.74958e-12	3.35458e-15
Glyma.20G017400	0	0	0	0	10	0	0	10	10	10	0	0	10	0	10	0	0	0	0	10	0	10	0	10	5	10	0	0	0	10	95	1.08448e-16	2.84133e-12	2.74958e-12	3.35458e-15
Glyma.09G109000	4	0	0	0	4	0	0	12	8	12	0	0	4	0	4	0	8	0	0	0	0	4	4	0	8	4	4	4	0	4	80	1.11098e-16	2.91077e-12	2.8159e-12	3.40441e-15
Glyma.10G091000	14	0	0	0	4	0	0	4	18	4	0	0	4	0	2	0	4	0	0	0	0	2	4	2	12	4	4	2	0	4	80	1.11098e-16	2.91077e-12	2.8159e-12	3.40441e-15
Glyma.10G099200	16	0	0	0	0	0	0	4	12	4	0	0	4	0	0	0	8	0	0	0	0	0	4	8	20	0	0	4	0	4	80	1.11098e-16	2.91077e-12	2.8159e-12	3.40441e-15
Glyma.12G109500	4	0	0	0	0	0	0	4	4	4	0	0	4	0	4	0	12	0	0	4	0	12	4	0	4	16	8	0	0	4	80	1.11098e-16	2.91077e-12	2.8159e-12	3.40441e-15
Glyma.16G069000	8	0	0	0	8	0	0	8	0	8	0	4	0	8	8	0	0	0	0	4	0	0	4	0	8	4	8	4	0	4	80	1.11098e-16	2.91077e-12	2.8159e-12	3.40441e-15
Glyma.01G123600	4	0	0	0	4	0	8	4	4	4	0	0	4	2	4	0	12	0	0	0	0	4	6	2	10	6	4	2	0	4	80	1.11098e-16	2.91077e-12	2.81589e-12	3.40441e-15
Glyma.01G153400	7	0	2	1	6	0	4	7	4	7	0	2	2	1	6	0	5	6	1	3	0	2	3	3	6	2	2	2	0	4	80	1.11098e-16	2.91077e-12	2.81589e-12	3.40441e-15
Glyma.04G135400	14	0	0	0	0	0	0	0	8	0	0	2	2	0	8	0	4	0	0	0	0	10	4	0	16	14	2	0	0	4	80	1.11098e-16	2.91077e-12	2.81589e-12	3.40441e-15
Glyma.18G122900	6	0	0	0	16	0	0	26	24	26	0	4	34	8	2	0	4	0	0	0	0	2	8	4	20	4	2	0	0	38	152	1.33478e-16	3.49711e-12	3.38299e-12	4.08541e-15
Glyma.15G166800	10	0	4	0	2	0	0	10	10	10	0	6	10	4	8	0	2	2	0	2	0	6	6	4	10	10	8	0	0	16	108	1.43439e-16	3.75811e-12	3.63475e-12	4.36482e-15
Glyma.19G153900	12	0	8	0	0	0	0	12	12	12	0	4	12	0	8	0	12	0	0	4	4	0	8	4	12	0	0	0	0	16	108	1.43439e-16	3.75811e-12	3.63475e-12	4.36482e-15
Glyma.06G252433	8	0	4	0	2	0	0	8	6	8	0	4	12	2	6	0	8	0	0	8	2	8	4	4	6	8	6	8	2	16	108	1.43439e-16	3.75811e-12	3.63475e-12	4.36482e-15
Glyma.07G094500	12	0	0	0	0	0	0	8	4	8	0	4	12	4	0	0	20	0	0	4	0	4	8	0	8	12	8	8	0	16	108	1.43439e-16	3.75811e-12	3.63475e-12	4.36482e-15
Glyma.07G166300	14	0	0	0	8	0	0	10	6	10	0	2	14	0	4	0	10	0	0	2	0	10	10	2	10	8	4	0	0	16	108	1.43439e-16	3.75811e-12	3.63475e-12	4.36482e-15
Glyma.07G174100	12	0	0	0	9	0	0	9	6	9	0	0	12	0	12	0	12	0	0	6	0	0	0	0	9	6	6	3	0	12	99	1.48538e-16	3.89169e-12	3.7638e-12	4.51472e-15
Glyma.18G194600	12	0	0	0	0	0	0	4	6	4	0	0	0	0	2	0	16	0	0	0	0	4	6	2	6	4	2	0	0	0	68	1.63495e-16	4.28358e-12	4.14249e-12	4.95785e-15
Glyma.08G193300	0	0	0	0	0	0	0	8	8	8	0	0	0	0	8	0	0	0	0	8	0	0	0	4	8	8	8	0	0	0	68	1.63495e-16	4.28358e-12	4.14249e-12	4.95785e-15
Glyma.08G261800	11	0	0	0	6	0	0	9	11	9	0	0	13	0	3	0	12	0	0	2	0	6	6	1	10	11	3	1	0	13	101	1.69419e-16	4.43878e-12	4.2924e-12	5.13154e-15
Glyma.19G070300	13	0	0	0	2	0	0	3	15	3	0	2	17	0	7	0	14	1	0	2	0	6	10	0	16	14	7	1	0	19	114	1.75781e-16	4.60545e-12	4.4534e-12	5.31807e-15
Glyma.09G016600	6	0	0	0	6	0	0	6	6	6	0	0	6	0	6	0	6	0	0	6	0	6	0	0	6	12	12	0	0	6	84	2.00268e-16	5.24701e-12	5.07238e-12	6.01032e-15
Glyma.09G021400	6	0	0	0	0	0	0	6	6	6	0	0	6	0	6	0	6	0	0	3	3	6	6	6	6	6	6	6	0	6	84	2.00268e-16	5.24701e-12	5.07238e-12	6.01032e-15
Glyma.09G225600	6	0	0	0	6	0	0	6	6	6	0	0	6	6	6	0	6	0	0	6	0	6	6	0	6	6	0	6	0	6	84	2.00268e-16	5.24701e-12	5.07238e-12	6.01032e-15
Glyma.10G082800	9	0	3	0	9	0	0	6	3	6	0	3	3	0	0	0	9	0	0	3	0	9	3	3	9	6	3	3	0	6	84	2.00268e-16	5.24701e-12	5.07238e-12	6.01032e-15
Glyma.10G226300	4	0	0	0	4	0	0	4	10	4	0	2	4	2	4	0	8	6	0	2	0	4	2	8	4	8	10	0	0	6	84	2.00268e-16	5.24701e-12	5.07238e-12	6.01032e-15
Glyma.17G244300	6	0	6	0	6	0	0	6	6	6	0	6	0	0	0	0	0	6	0	0	6	6	0	6	6	6	6	6	0	6	84	2.00268e-16	5.24701e-12	5.07238e-12	6.01032e-15
Glyma.01G087600	6	0	0	0	6	8	6	6	6	6	0	0	6	0	4	0	6	0	0	2	0	6	4	0	6	6	4	2	0	6	84	2.00268e-16	5.24701e-12	5.07238e-12	6.01032e-15
Glyma.17G188600	11	0	0	0	2	0	0	13	5	13	0	2	9	0	1	0	15	0	0	0	0	9	3	0	9	10	3	2	0	11	96	2.08205e-16	5.45497e-12	5.27321e-12	6.24139e-15
Glyma.07G201500	12	0	3	0	3	0	0	12	9	12	0	6	9	3	0	0	3	0	0	3	0	9	3	6	9	12	6	0	0	15	105	2.10687e-16	5.52e-12	5.33586e-12	6.30857e-15
Glyma.13G005500	9	0	0	0	1	0	0	1	8	1	0	1	2	1	0	0	11	1	0	2	0	9	7	4	8	8	5	0	0	3	76	2.15475e-16	5.64545e-12	5.45691e-12	6.44457e-15
Glyma.16G087251	11	0	0	0	6	0	0	5	9	5	0	0	9	1	4	0	10	2	0	3	0	2	4	1	9	10	6	3	0	9	91	2.40387e-16	6.29814e-12	6.08756e-12	7.18146e-15
Glyma.18G155900	12	0	0	0	8	0	0	2	12	2	0	0	12	0	4	0	12	0	0	0	0	4	10	0	14	12	6	0	0	12	98	2.40831e-16	6.30977e-12	6.09856e-12	7.18652e-15
Glyma.14G127800	12	0	0	0	6	0	0	12	12	12	0	0	18	0	3	0	15	0	0	0	0	0	6	0	12	18	0	3	0	18	111	2.65176e-16	6.94762e-12	6.71427e-12	7.88606e-15
Glyma.19G068800	15	0	0	0	3	0	0	12	6	12	0	0	18	0	0	0	15	0	0	0	0	12	9	0	12	12	3	0	0	18	111	2.65176e-16	6.94762e-12	6.71427e-12	7.88606e-15
Glyma.06G202500	12	0	0	0	6	0	0	9	9	9	0	3	15	6	6	0	12	0	0	3	0	12	9	3	9	3	3	0	0	18	111	2.65176e-16	6.94762e-12	6.71427e-12	7.88606e-15
Glyma.18G168300	6	0	0	0	2	0	0	10	6	10	2	0	11	0	1	0	9	2	0	1	1	8	10	12	7	10	4	1	0	13	100	2.73956e-16	7.17764e-12	6.93628e-12	8.13791e-15
Glyma.03G070300	9	0	0	0	6	0	0	8	8	8	0	0	10	1	5	0	9	0	0	3	0	7	5	0	8	8	8	0	0	10	93	2.88036e-16	7.54655e-12	7.29222e-12	8.53682e-15
Glyma.18G135300	6	0	0	0	4	0	0	9	12	9	0	1	9	0	4	0	11	0	1	0	0	6	6	3	12	5	4	1	0	10	93	2.88036e-16	7.54655e-12	7.29222e-12	8.53682e-15
Glyma.04G119700	10	0	0	0	0	0	0	25	10	25	0	0	20	0	5	0	5	0	0	5	0	5	5	5	5	5	5	0	0	20	115	2.92697e-16	7.66867e-12	7.40992e-12	8.66516e-15
Glyma.06G246300	6	0	0	0	15	0	0	18	15	18	0	0	27	0	0	0	6	3	0	3	0	6	6	6	15	6	6	0	0	27	129	3.17371e-16	8.31512e-12	8.03425e-12	9.38502e-15
Glyma.07G209300	8	0	0	0	8	0	0	8	8	8	0	0	8	0	0	0	8	0	0	8	0	8	8	0	8	8	0	0	0	8	88	3.21526e-16	8.42399e-12	8.13783e-12	9.45453e-15
Glyma.10G058300	4	0	4	0	0	0	0	8	8	8	0	0	8	0	4	0	12	0	0	0	0	8	4	0	12	8	8	0	0	8	88	3.21526e-16	8.42399e-12	8.13783e-12	9.45453e-15
Glyma.16G175100	8	0	2	0	2	0	0	4	6	4	0	2	6	2	4	2	14	0	2	2	0	2	2	2	6	12	6	4	2	8	88	3.21526e-16	8.42399e-12	8.13783e-12	9.45453e-15
Glyma.18G073400	8	0	0	0	8	0	0	8	8	8	0	0	8	0	12	0	8	0	0	0	0	4	4	0	8	8	4	0	0	8	88	3.21526e-16	8.42399e-12	8.13783e-12	9.45453e-15
Glyma.04G233300	4	0	6	0	6	0	0	2	10	2	0	2	6	2	4	0	6	2	2	0	0	4	6	6	6	8	10	2	0	8	88	3.21526e-16	8.42399e-12	8.13783e-12	9.45453e-15
Glyma.18G129000	12	0	0	0	3	0	0	15	6	15	0	0	6	1	2	0	6	2	0	1	0	5	2	0	5	5	3	0	0	6	83	3.29567e-16	8.63465e-12	8.34101e-12	9.6801e-15
Glyma.16G110100	12	0	0	0	18	0	0	8	12	8	0	2	34	4	8	0	34	2	0	2	0	2	8	0	16	8	4	0	0	36	146	3.52832e-16	9.24419e-12	8.92947e-12	1.03518e-14
Glyma.10G105100	9	0	0	0	3	0	0	3	18	3	0	0	3	0	3	0	6	0	0	3	0	3	3	0	9	6	3	3	0	3	75	3.56788e-16	9.34784e-12	9.02851e-12	1.04329e-14
Glyma.17G152800	6	0	0	0	0	0	0	6	6	6	0	0	3	3	3	0	6	3	0	0	0	6	3	3	12	9	0	3	0	3	75	3.56788e-16	9.34784e-12	9.02851e-12	1.04329e-14
Glyma.02G184600	0	0	0	0	3	0	3	9	9	9	0	3	0	3	0	0	0	0	0	0	0	9	6	9	0	9	6	0	0	3	75	3.56788e-16	9.34784e-12	9.02851e-12	1.04329e-14
Glyma.08G244900	9	0	0	0	9	0	0	9	9	9	0	0	9	0	0	0	9	0	0	0	0	0	0	0	9	9	9	9	0	9	90	3.92654e-16	1.02875e-11	9.93454e-12	1.14306e-14
Glyma.10G152200	9	0	0	0	0	0	0	18	0	18	0	0	9	0	9	0	0	0	0	0	0	9	0	0	9	9	9	0	0	9	90	3.92654e-16	1.02875e-11	9.93454e-12	1.14306e-14
Glyma.13G001500	30	0	0	0	0	0	0	0	3	0	0	9	0	3	0	0	3	0	0	0	0	24	12	6	3	3	3	0	0	9	90	3.92654e-16	1.02875e-11	9.93454e-12	1.14306e-14
Glyma.01G004800	0	0	0	0	0	9	9	9	0	9	0	9	0	9	0	0	9	0	0	0	0	9	0	0	9	9	9	0	0	9	90	3.92654e-16	1.02875e-11	9.93454e-12	1.14306e-14
Glyma.01G014600	5	0	0	0	5	5	5	5	5	5	0	5	0	5	0	0	5	0	0	5	0	5	5	5	5	5	5	0	0	5	80	4.12305e-16	1.08024e-11	1.04297e-11	1.19363e-14
Glyma.08G239900	5	0	5	0	5	0	0	5	5	5	0	0	5	5	5	0	5	0	0	5	0	5	5	5	5	5	5	0	0	5	80	4.12305e-16	1.08024e-11	1.04297e-11	1.19363e-14
Glyma.10G280700	5	0	0	0	5	0	0	5	5	5	0	0	5	0	5	0	5	0	0	5	0	5	5	5	10	5	5	5	0	5	80	4.12305e-16	1.08024e-11	1.04297e-11	1.19363e-14
Glyma.15G274000	5	0	0	0	5	0	0	5	5	5	0	0	5	0	0	0	30	0	0	0	0	5	0	0	5	5	5	5	0	5	80	4.12305e-16	1.08024e-11	1.04297e-11	1.19363e-14
Glyma.17G188300	5	0	0	0	5	0	0	5	5	5	0	0	5	0	0	0	20	0	0	0	0	15	5	0	5	5	5	0	0	5	80	4.12305e-16	1.08024e-11	1.04297e-11	1.19363e-14
Glyma.08G063300	6	0	0	0	6	0	0	0	6	0	0	0	0	6	6	0	6	0	0	6	0	6	6	6	6	0	0	0	0	0	66	4.50923e-16	1.18142e-11	1.14047e-11	1.29969e-14
Glyma.10G170800	6	0	6	0	6	0	0	6	6	6	0	0	0	6	0	0	6	0	0	6	0	6	6	0	0	0	0	0	0	0	66	4.50923e-16	1.18142e-11	1.14047e-11	1.29969e-14
Glyma.13G004400	6	0	0	0	0	0	0	0	9	0	0	0	0	0	0	0	6	3	0	6	0	6	3	0	6	6	9	6	0	0	66	4.50923e-16	1.18142e-11	1.14047e-11	1.29969e-14
Glyma.11G253100	0	0	0	0	0	0	0	6	6	6	0	0	0	6	6	0	0	0	0	6	6	6	6	6	0	6	0	0	0	0	66	4.50923e-16	1.18142e-11	1.14047e-11	1.29969e-14
Glyma.06G214300	8	0	0	0	8	0	0	8	8	8	0	2	8	4	2	0	8	0	0	6	0	6	6	2	2	8	8	0	0	10	92	4.69229e-16	1.22938e-11	1.18673e-11	1.35097e-14
Glyma.06G224200	4	0	0	0	8	0	0	12	14	12	0	0	6	0	2	0	6	0	0	0	0	6	2	0	12	4	0	0	0	6	82	5.42289e-16	1.4208e-11	1.37145e-11	1.5596e-14
Glyma.13G333300	6	0	0	0	6	0	0	6	6	6	0	6	6	6	12	0	6	0	6	0	0	6	6	0	6	6	6	6	0	12	96	6.32425e-16	1.65695e-11	1.59902e-11	1.80693e-14
Glyma.15G108100	6	0	0	0	6	0	0	6	6	6	0	6	6	6	6	0	6	0	0	6	0	6	6	6	6	6	6	6	0	12	96	6.32425e-16	1.65695e-11	1.59902e-11	1.80693e-14
Glyma.15G221600	6	0	0	0	12	0	0	6	6	6	0	0	12	0	6	0	12	6	0	6	0	12	6	0	6	6	0	0	0	12	96	6.32425e-16	1.65695e-11	1.59902e-11	1.80693e-14
Glyma.16G219600	8	0	0	0	0	0	0	8	4	8	0	4	8	8	0	0	8	0	0	0	0	8	8	4	8	8	8	8	0	12	96	6.32425e-16	1.65695e-11	1.59902e-11	1.80693e-14
Glyma.17G254700	6	0	0	0	6	0	0	6	6	6	0	6	6	6	6	0	6	0	0	6	0	6	6	6	6	6	6	6	0	12	96	6.32425e-16	1.65695e-11	1.59902e-11	1.80693e-14
Glyma.02G161900	12	0	0	0	6	0	6	6	6	6	0	0	12	0	6	0	12	0	0	0	0	6	12	0	12	6	0	0	0	12	96	6.32425e-16	1.65695e-11	1.59902e-11	1.80693e-14
Glyma.03G253000	7	0	0	0	7	0	0	7	0	7	0	0	7	0	7	0	7	7	0	0	0	7	0	7	7	7	7	0	0	7	84	6.92731e-16	1.81496e-11	1.75122e-11	1.97064e-14
Glyma.17G125100	7	0	0	0	0	0	0	7	7	7	0	0	7	0	7	0	7	0	0	7	0	7	0	0	7	7	7	7	0	7	84	6.92731e-16	1.81496e-11	1.75122e-11	1.97064e-14
Glyma.20G043400	7	0	0	0	7	0	0	7	7	7	0	0	7	0	7	0	7	0	0	0	0	7	7	0	7	7	7	0	0	7	84	6.92731e-16	1.81496e-11	1.75122e-11	1.97064e-14
Glyma.20G177200	7	0	0	0	0	0	0	14	7	14	0	0	7	0	7	0	7	0	0	0	0	7	0	0	7	7	7	0	0	7	84	6.92731e-16	1.81496e-11	1.75122e-11	1.97064e-14
Glyma.03G066000	11	0	0	0	7	0	0	10	10	10	0	1	12	0	2	0	11	0	0	3	0	6	3	0	10	10	4	1	0	13	98	7.1551e-16	1.87464e-11	1.80867e-11	2.03102e-14
Glyma.03G069900	11	0	0	0	3	0	0	13	10	13	0	0	13	0	1	0	14	1	0	1	0	3	3	1	14	7	2	1	0	13	98	7.1551e-16	1.87464e-11	1.80867e-11	2.03102e-14
Glyma.10G150000	13	0	0	0	0	0	0	0	0	0	0	0	0	0	0	0	13	0	0	0	0	0	0	0	13	13	13	0	0	0	65	7.48981e-16	1.96233e-11	1.89297e-11	2.11686e-14
Glyma.17G137100	5	0	5	0	5	0	0	0	5	0	0	0	0	0	5	0	5	0	0	0	0	5	5	5	5	5	5	5	0	0	65	7.48981e-16	1.96233e-11	1.89297e-11	2.11686e-14
Glyma.19G004900	0	0	0	0	0	0	0	13	0	13	0	0	0	0	0	0	0	26	0	0	0	0	0	0	0	0	0	13	0	0	65	7.48981e-16	1.96233e-11	1.89297e-11	2.11686e-14
Glyma.06G289600	13	0	13	0	0	0	0	0	0	0	0	0	0	0	0	0	0	0	0	0	0	0	0	0	0	13	13	13	0	0	65	7.48981e-16	1.96233e-11	1.89297e-11	2.11686e-14
Glyma.14G161701	11	0	0	0	4	0	0	15	17	15	0	0	21	1	6	0	19	0	0	0	0	2	5	0	8	8	3	1	0	21	115	7.60244e-16	1.99184e-11	1.92136e-11	2.14638e-14
Glyma.05G092400	18	0	1	0	4	0	0	15	12	15	0	1	22	0	0	0	16	0	0	0	0	3	9	0	11	11	3	1	0	23	119	7.87408e-16	2.06301e-11	1.98994e-11	2.22068e-14
Glyma.03G073778	10	0	0	0	6	0	0	12	10	12	0	0	14	0	0	0	16	2	0	4	0	2	6	4	12	4	0	0	0	14	100	7.97144e-16	2.08852e-11	2.01446e-11	2.24572e-14
Glyma.01G073400	4	0	2	0	2	4	4	4	4	4	0	0	4	0	2	0	16	0	0	0	0	2	2	4	14	4	2	2	0	4	76	8.28991e-16	2.17196e-11	2.09445e-11	2.32047e-14
Glyma.02G177800	4	0	0	0	4	0	12	4	4	4	0	0	4	0	4	0	4	0	0	0	0	4	8	4	8	8	4	0	0	4	76	8.28991e-16	2.17196e-11	2.09445e-11	2.32047e-14
Glyma.02G188000	5	0	1	0	7	0	4	9	9	9	0	2	2	1	1	0	1	0	0	1	0	5	1	2	5	7	8	0	0	4	76	8.28991e-16	2.17196e-11	2.09445e-11	2.32047e-14
Glyma.16G153100	12	0	0	0	0	0	0	4	4	4	0	0	4	0	0	0	8	0	0	0	0	8	4	4	8	8	8	4	0	4	76	8.28992e-16	2.17196e-11	2.09445e-11	2.32047e-14
Glyma.19G027700	4	0	0	0	0	0	0	4	4	4	0	0	4	8	0	0	12	0	0	0	0	0	8	8	12	4	4	4	0	4	76	8.28992e-16	2.17196e-11	2.09445e-11	2.32047e-14
Glyma.06G313600	0	0	0	0	12	0	0	0	12	0	0	4	0	8	0	0	0	4	0	0	0	0	4	12	0	12	12	0	0	4	76	8.28992e-16	2.17196e-11	2.09445e-11	2.32047e-14
Glyma.01G045200	6	0	1	0	4	5	8	8	7	8	0	4	7	1	5	0	8	2	0	1	0	1	4	3	12	7	2	0	0	11	93	8.92819e-16	2.33918e-11	2.25526e-11	2.48585e-14
Glyma.08G261000	12	0	1	0	0	0	0	11	11	11	0	0	11	0	1	1	10	0	0	1	0	3	7	0	14	7	3	0	0	11	93	8.92819e-16	2.33919e-11	2.25526e-11	2.48585e-14
Glyma.09G087000	4	0	0	0	12	0	0	13	16	13	0	3	8	1	3	0	4	1	0	0	0	5	1	5	9	3	2	1	0	11	93	8.92819e-16	2.33919e-11	2.25526e-11	2.48585e-14
Glyma.17G165300	9	0	0	0	5	0	0	10	10	10	0	1	10	0	4	0	8	1	0	1	0	5	2	2	10	10	4	2	0	11	93	8.92819e-16	2.33919e-11	2.25526e-11	2.48585e-14
Glyma.20G080200	6	0	0	0	6	0	0	6	6	6	0	0	6	3	3	0	6	3	0	3	0	6	6	3	6	6	6	0	0	6	81	8.92218e-16	2.33761e-11	2.2541e-11	2.48585e-14
Glyma.12G171000	8	0	0	0	8	0	0	8	16	8	0	8	8	0	0	0	16	0	0	8	0	8	0	0	8	8	8	0	0	16	104	9.4913e-16	2.48672e-11	2.39731e-11	2.63703e-14
Glyma.18G252100	0	0	0	0	8	0	0	8	8	8	0	8	8	0	8	0	8	0	0	0	0	8	8	8	8	8	8	8	0	16	104	9.4913e-16	2.48672e-11	2.39731e-11	2.63703e-14
Glyma.18G142700	8	0	1	0	7	0	0	9	10	9	0	1	11	0	4	0	8	1	0	2	0	7	5	2	10	8	3	1	0	12	95	1.02429e-15	2.68364e-11	2.58695e-11	2.83983e-14
Glyma.18G196600	7	0	0	0	6	0	0	9	9	9	0	3	9	1	7	0	9	7	2	0	0	9	5	0	9	1	0	5	0	12	95	1.02429e-15	2.68364e-11	2.58695e-11	2.83983e-14
Glyma.10G260750	9	9	0	0	9	0	0	9	9	9	0	9	9	0	0	0	9	0	0	0	0	0	9	9	9	9	9	0	0	18	108	1.07623e-15	2.81973e-11	2.71781e-11	2.9744e-14
Glyma.13G043700	9	0	0	0	0	0	0	18	0	18	0	9	9	9	0	0	9	9	0	0	0	9	9	0	18	0	0	0	0	18	108	1.07623e-15	2.81973e-11	2.71781e-11	2.9744e-14
Glyma.06G181700	9	0	0	0	9	0	0	9	9	9	0	9	9	0	0	0	0	9	0	0	0	9	9	0	9	9	9	9	0	18	108	1.07623e-15	2.81973e-11	2.71781e-11	2.9744e-14
Glyma.15G205600	6	0	0	3	9	0	0	6	24	6	0	0	30	0	3	0	30	3	0	0	0	6	3	3	12	12	6	0	0	30	132	1.11148e-15	2.91208e-11	2.8066e-11	3.06534e-14
Glyma.15G226500	12	0	0	0	18	0	0	0	18	0	0	0	30	6	18	0	6	6	0	0	0	18	0	0	12	6	6	6	0	30	132	1.11148e-15	2.91208e-11	2.8066e-11	3.06534e-14
Glyma.10G118200	11	0	0	0	9	0	0	10	8	10	0	0	7	0	2	1	7	0	0	0	0	3	5	0	10	3	3	1	0	7	83	1.13684e-15	2.97852e-11	2.87052e-11	3.13198e-14
Glyma.18G154900	6	0	0	0	6	0	0	8	10	8	0	0	20	2	4	0	22	0	0	0	0	10	6	0	10	14	6	0	0	20	112	1.16995e-15	3.06527e-11	2.95389e-11	3.21644e-14
Glyma.18G268900	12	0	8	0	8	0	0	8	0	8	4	8	8	8	8	0	8	0	0	4	0	8	4	0	12	4	0	12	0	20	112	1.16995e-15	3.06527e-11	2.95389e-11	3.21644e-14
Glyma.03G120000	5	0	5	0	15	0	0	0	0	0	0	5	5	10	0	0	0	0	0	0	0	0	0	5	25	15	10	0	0	10	90	1.24419e-15	3.25978e-11	3.14071e-11	3.4027e-14
Glyma.04G048800	5	0	0	0	5	0	0	5	5	5	0	0	10	0	5	0	15	5	0	0	0	5	0	5	10	15	5	0	0	10	90	1.24419e-15	3.25978e-11	3.14071e-11	3.4027e-14
Glyma.04G221100	10	0	0	0	10	0	0	0	0	0	0	0	10	0	0	0	10	10	0	0	0	0	10	0	10	10	10	10	0	10	90	1.24419e-15	3.25978e-11	3.14071e-11	3.4027e-14
Glyma.11G101600	10	0	0	0	10	0	0	0	0	0	0	10	0	10	0	10	0	0	0	10	0	10	10	10	10	0	0	0	0	10	90	1.24419e-15	3.25978e-11	3.14071e-11	3.4027e-14
Glyma.01G167900	0	0	0	0	0	0	12	0	0	0	0	0	0	0	0	0	16	8	4	0	0	0	4	0	0	8	4	8	0	0	64	1.24419e-15	3.25978e-11	3.14071e-11	3.4027e-14
Glyma.18G155200	9	0	1	0	8	0	0	6	8	6	0	3	11	2	4	0	9	0	0	2	0	8	8	2	9	8	8	1	0	14	99	1.28394e-15	3.36391e-11	3.24091e-11	3.50773e-14
Glyma.10G108650	10	0	0	0	4	0	0	7	12	7	1	0	7	0	2	0	7	0	0	1	0	4	6	1	9	8	7	0	0	8	85	1.41061e-15	3.6958e-11	3.5601e-11	3.83779e-14
Glyma.11G169200	7	0	0	0	5	0	0	9	9	9	0	0	8	0	4	0	7	0	0	2	0	7	4	0	9	9	4	0	0	8	85	1.41061e-15	3.6958e-11	3.5601e-11	3.83779e-14
Glyma.20G063700	15	1	1	0	4	0	0	15	11	15	1	1	13	0	0	0	12	0	0	0	0	3	5	0	6	8	3	2	0	15	101	1.40637e-15	3.68468e-11	3.54981e-11	3.83779e-14
Glyma.01G070400	3	1	1	0	5	5	5	7	4	7	1	1	6	1	2	0	12	0	1	2	0	4	2	1	11	4	5	1	1	8	85	1.41061e-15	3.6958e-11	3.5601e-11	3.8378e-14
Glyma.02G090800	8	0	4	0	2	0	6	6	4	6	0	2	4	2	2	0	4	4	0	6	0	2	2	2	6	6	6	2	0	6	80	1.46778e-15	3.84559e-11	3.70424e-11	3.9892e-14
Glyma.08G074700	6	0	3	0	3	0	0	3	3	3	0	0	3	3	3	0	6	0	0	6	0	3	3	3	6	6	6	6	0	3	72	1.62003e-15	4.24449e-11	4.08783e-11	4.3848e-14
Glyma.06G313800	0	0	0	0	12	0	0	0	12	0	0	3	0	9	0	0	0	3	0	3	0	0	6	3	3	12	6	3	0	3	72	1.62003e-15	4.24449e-11	4.08783e-11	4.3848e-14
Glyma.10G135500	0	0	0	0	9	0	0	9	9	9	0	3	0	0	0	0	6	0	0	3	0	9	6	0	6	0	0	6	0	3	72	1.62003e-15	4.24449e-11	4.08783e-11	4.3848e-14
Glyma.01G014500	6	0	0	0	3	3	6	3	3	3	0	0	3	3	3	0	6	0	0	3	0	6	6	6	3	6	3	0	0	3	72	1.62003e-15	4.24449e-11	4.08783e-11	4.3848e-14
Glyma.10G116500	12	0	0	0	6	0	0	8	10	8	0	2	10	0	6	0	10	0	0	0	0	2	8	4	8	8	2	2	0	12	94	1.65834e-15	4.34485e-11	4.18416e-11	4.47923e-14
Glyma.15G218900	6	0	1	0	4	0	0	13	8	13	0	2	10	0	2	0	9	1	0	2	0	9	1	3	6	9	5	2	0	12	94	1.65834e-15	4.34485e-11	4.18416e-11	4.47923e-14
Glyma.01G064050	9	0	3	0	9	6	3	3	9	3	0	3	6	0	6	0	6	3	0	0	0	6	0	6	3	3	3	6	0	9	87	1.70873e-15	4.47687e-11	4.31061e-11	4.59638e-14
Glyma.06G260800	6	0	3	0	9	0	0	6	15	6	0	0	9	0	3	0	6	3	0	0	0	3	0	0	9	15	3	0	0	9	87	1.70873e-15	4.47687e-11	4.31061e-11	4.59638e-14
Glyma.11G183700	9	0	0	0	9	0	0	9	0	9	0	9	0	3	0	0	6	0	0	0	0	3	9	0	0	9	12	9	0	9	87	1.70873e-15	4.47687e-11	4.31061e-11	4.59638e-14
Glyma.20G077400	6	0	0	0	3	0	0	9	9	9	0	0	9	0	3	0	12	3	0	0	0	6	3	0	9	12	3	0	0	9	87	1.70873e-15	4.47687e-11	4.31061e-11	4.59638e-14
Glyma.04G148900	13	0	0	0	3	0	0	10	13	10	0	1	12	0	6	0	13	0	0	1	0	1	4	1	10	6	4	1	0	13	96	1.86575e-15	4.88825e-11	4.70653e-11	5.01359e-14
Glyma.05G119000	5	1	2	0	5	0	0	9	10	9	0	5	5	1	6	0	7	2	0	2	2	4	4	1	10	6	2	1	0	10	89	2.0251e-15	5.30575e-11	5.1083e-11	5.43622e-14
Glyma.02G175400	14	0	0	0	0	0	14	7	7	7	0	0	14	0	0	0	7	0	0	0	0	7	7	0	7	14	7	0	0	14	98	2.06707e-15	5.41571e-11	5.21211e-11	5.49261e-14
Glyma.06G030100	9	0	0	0	0	0	0	0	0	0	0	0	0	0	0	0	9	9	0	9	0	0	9	0	0	9	9	0	0	0	63	2.06707e-15	5.41571e-11	5.21211e-11	5.49261e-14
Glyma.09G020300	7	0	0	0	0	0	0	7	7	7	0	7	7	7	7	0	7	7	0	7	0	7	7	7	7	7	0	0	0	14	98	2.06707e-15	5.41571e-11	5.21211e-11	5.49261e-14
Glyma.14G100200	7	0	0	0	7	0	0	7	7	7	0	7	7	7	7	0	7	0	0	0	0	7	0	0	14	7	7	7	0	14	98	2.06707e-15	5.41571e-11	5.21211e-11	5.49261e-14
Glyma.16G058000	21	0	0	0	0	0	0	0	0	0	0	0	0	0	0	0	14	0	0	0	0	0	7	0	7	7	7	0	0	0	63	2.06707e-15	5.41571e-11	5.21211e-11	5.49261e-14
Glyma.18G145700	12	0	0	0	7	0	0	4	11	4	0	1	13	1	2	0	15	0	0	0	0	6	8	1	11	10	6	0	0	14	98	2.06707e-15	5.41571e-11	5.21211e-11	5.49261e-14
Glyma.17G208500	0	0	0	0	14	0	0	7	14	7	0	7	7	0	14	0	14	0	0	0	0	7	7	0	7	7	0	0	0	14	98	2.06707e-15	5.41571e-11	5.21211e-11	5.49261e-14
Glyma.14G064700	0	0	0	0	0	0	0	0	0	0	0	0	0	0	0	0	7	0	0	21	0	0	0	14	0	21	0	0	0	0	63	2.06707e-15	5.41571e-11	5.21211e-11	5.49261e-14
Glyma.15G075500	0	0	0	0	0	0	0	0	0	0	0	0	0	0	0	0	0	0	0	0	0	21	0	21	21	0	0	0	0	0	63	2.06707e-15	5.41571e-11	5.21211e-11	5.49261e-14
Glyma.01G184600	0	0	0	0	0	0	0	0	0	0	0	0	0	0	0	0	0	0	0	0	0	0	21	0	42	0	0	0	0	0	63	2.06707e-15	5.41571e-11	5.21211e-11	5.49261e-14
Glyma.19G069500	13	0	0	0	4	0	0	6	10	6	0	1	14	0	4	0	14	0	0	1	0	4	7	0	12	11	8	0	0	15	100	2.25788e-15	5.91566e-11	5.6928e-11	5.98751e-14
Glyma.19G148900	0	0	0	0	10	0	0	10	10	10	0	5	10	0	10	5	0	0	0	0	0	10	5	5	0	10	5	10	0	15	100	2.25788e-15	5.91566e-11	5.6928e-11	5.98751e-14
Glyma.01G077600	8	0	0	0	2	4	4	8	4	8	0	0	4	0	0	0	6	0	0	2	0	4	2	0	12	6	4	0	0	4	74	2.26428e-15	5.93242e-11	5.70871e-11	5.9984e-14
Glyma.01G030500	4	0	4	4	4	4	4	4	4	4	0	4	4	4	4	0	4	0	0	4	4	4	4	4	4	4	4	4	0	8	84	2.30828e-15	6.0477e-11	5.81756e-11	6.05982e-14
Glyma.02G237500	4	0	0	0	4	0	0	8	4	8	0	4	4	0	8	0	8	0	0	4	0	4	8	4	8	4	8	0	0	8	84	2.30828e-15	6.0477e-11	5.81756e-11	6.05982e-14
Glyma.06G204800	8	0	2	0	6	0	0	6	6	6	0	0	8	2	2	0	8	0	2	4	0	4	4	2	4	8	8	2	0	8	84	2.30828e-15	6.0477e-11	5.81756e-11	6.05982e-14
Glyma.07G162100	12	0	0	0	4	0	0	8	8	8	0	0	8	0	0	0	8	0	0	0	0	8	8	0	8	8	4	0	0	8	84	2.30828e-15	6.0477e-11	5.81756e-11	6.05982e-14
Glyma.14G079900	4	0	0	0	6	0	0	8	16	8	0	0	8	2	0	0	12	0	0	0	2	4	6	0	14	2	0	0	0	8	84	2.30828e-15	6.0477e-11	5.81756e-11	6.05982e-14
Glyma.14G139700	6	0	0	0	4	0	0	12	8	12	0	0	8	0	4	0	6	0	0	0	0	2	6	0	14	6	4	0	0	8	84	2.30828e-15	6.0477e-11	5.81756e-11	6.05982e-14
Glyma.17G211000	4	0	0	0	8	0	0	8	4	8	0	4	4	0	4	0	12	0	0	0	0	12	4	4	4	8	4	0	0	8	84	2.30828e-15	6.0477e-11	5.81756e-11	6.05982e-14
Glyma.17G175900	0	0	0	0	0	0	0	14	0	14	0	8	0	0	0	0	16	0	0	0	0	0	2	4	0	14	12	8	0	8	84	2.30828e-15	6.0477e-11	5.81756e-11	6.05982e-14
Glyma.17G181100	0	0	0	0	0	0	0	16	4	16	0	0	8	0	0	0	28	0	0	0	0	4	4	0	4	4	4	0	0	8	84	2.30828e-15	6.0477e-11	5.81756e-11	6.05982e-14
Glyma.06G242000	2	0	0	0	16	0	0	14	24	14	0	2	14	2	2	0	6	2	0	2	0	2	2	4	2	4	2	2	0	16	102	2.43424e-15	6.3777e-11	6.13477e-11	6.38409e-14
Glyma.05G165800	6	0	3	0	6	0	0	6	6	6	0	6	6	3	0	0	6	3	0	6	0	6	6	3	9	6	6	6	0	12	93	2.68384e-15	7.03167e-11	6.76356e-11	7.03167e-14
Glyma.03G228500	15	0	5	0	5	0	0	5	15	5	0	5	15	0	5	0	15	0	0	0	0	10	5	0	15	5	5	0	0	20	110	2.93775e-15	7.69691e-11	7.40314e-11	7.68922e-14
Glyma.17G225800	0	0	0	0	7	0	0	14	0	14	0	7	14	0	7	0	0	0	0	0	0	14	7	7	0	14	14	14	0	21	112	3.00495e-15	7.87295e-11	7.57216e-11	7.85724e-14
Glyma.04G157500	10	0	0	0	7	0	0	7	11	7	0	1	12	1	5	0	12	0	0	1	0	3	7	0	10	7	5	2	0	13	95	3.0109e-15	7.88856e-11	7.58686e-11	7.86496e-14
Glyma.06G215200	8	0	0	0	5	0	0	6	6	6	0	0	7	0	4	0	7	0	0	3	0	6	5	6	4	7	6	2	0	7	81	3.0602e-15	8.01773e-11	7.71018e-11	7.96991e-14
Glyma.10G080301	9	0	0	0	7	0	0	0	0	0	0	2	0	0	0	0	10	1	0	0	0	7	7	2	9	9	5	2	0	2	68	3.05819e-15	8.01245e-11	7.70541e-11	7.96991e-14
Glyma.17G194100	10	0	0	0	0	0	0	8	0	8	0	2	0	2	0	0	4	0	0	0	2	4	6	0	8	8	6	2	0	2	68	3.05819e-15	8.01245e-11	7.70541e-11	7.96991e-14
Glyma.09G208700	2	0	6	0	8	0	0	8	8	8	0	2	8	2	8	0	10	0	0	0	0	2	2	6	8	8	2	0	0	10	88	3.29511e-15	8.63318e-11	8.30136e-11	8.56466e-14
Glyma.07G173900	8	0	0	0	5	0	0	9	7	9	0	3	7	3	4	0	8	0	0	1	0	5	7	0	8	7	7	0	0	10	88	3.29511e-15	8.63318e-11	8.30136e-11	8.56466e-14
Glyma.19G196300	2	0	0	0	4	0	0	6	6	6	0	0	0	4	0	0	4	0	2	2	2	4	4	4	4	4	4	0	0	0	62	3.43457e-15	8.99858e-11	8.65238e-11	8.91832e-14
Glyma.15G156900	9	0	0	0	9	0	0	9	9	9	0	6	9	0	3	0	9	0	0	0	0	9	6	12	9	3	3	0	0	15	99	3.62317e-15	9.4927e-11	9.12676e-11	9.38941e-14
Glyma.18G143700	3	0	0	0	6	0	0	6	9	6	0	0	15	6	3	3	12	0	0	0	0	9	3	3	9	9	9	3	0	15	99	3.62317e-15	9.4927e-11	9.12676e-11	9.38941e-14
Glyma.06G236400	8	0	1	0	6	0	0	8	8	8	0	3	8	0	4	0	8	0	1	4	0	6	5	5	9	6	3	0	0	11	90	3.81707e-15	1.00007e-10	9.61481e-11	9.88213e-14
Glyma.08G011700	12	6	0	0	0	0	0	0	0	0	0	6	0	0	0	0	6	0	0	12	0	0	6	12	6	12	6	0	0	6	78	3.97089e-15	1.04037e-10	9.9983e-11	1.01798e-13
Glyma.08G327900	6	0	0	0	6	0	0	6	6	6	0	0	6	0	6	0	6	0	0	0	0	6	6	0	12	6	6	0	0	6	78	3.97089e-15	1.04037e-10	9.9983e-11	1.01798e-13
Glyma.10G120200	6	0	0	0	6	0	0	6	6	6	0	0	6	0	6	0	6	0	0	0	0	6	6	6	6	6	6	0	0	6	78	3.97089e-15	1.04037e-10	9.9983e-11	1.01798e-13
Glyma.13G006200	12	0	0	0	0	0	0	0	0	0	0	6	0	6	0	0	12	0	0	6	0	12	0	12	6	12	0	0	0	6	78	3.97089e-15	1.04037e-10	9.9983e-11	1.01798e-13
Glyma.15G042700	6	0	0	0	6	0	0	6	6	6	0	0	6	0	6	0	6	0	0	6	0	6	6	0	6	6	6	0	0	6	78	3.97089e-15	1.04037e-10	9.9983e-11	1.01798e-13
Glyma.16G214000	6	0	0	0	9	0	0	6	9	6	0	0	6	0	0	3	9	0	0	0	0	6	3	6	0	6	6	3	0	6	78	3.97089e-15	1.04037e-10	9.9983e-11	1.01798e-13
Glyma.20G061900	6	0	0	0	6	0	0	6	6	6	0	0	6	0	6	0	6	0	0	0	0	6	6	0	12	6	6	0	0	6	78	3.97089e-15	1.04037e-10	9.9983e-11	1.01798e-13
Glyma.01G144900	6	0	0	0	6	0	6	6	6	6	0	0	6	0	6	0	6	0	0	0	0	6	6	6	6	6	0	0	0	6	78	3.97089e-15	1.04037e-10	9.9983e-11	1.01798e-13
Glyma.03G137900	6	0	0	0	0	0	0	6	12	6	0	0	6	0	0	0	12	0	0	0	0	0	6	6	12	12	0	0	0	6	78	3.97089e-15	1.04037e-10	9.9983e-11	1.01798e-13
Glyma.06G178600	8	0	6	0	4	0	0	2	6	2	0	2	4	0	2	0	6	6	0	6	0	6	4	2	6	6	6	0	0	6	78	3.97089e-15	1.04037e-10	9.9983e-11	1.01798e-13
Glyma.08G301700	4	0	0	0	4	0	0	4	4	4	0	8	4	0	8	0	16	12	0	0	0	4	4	0	16	4	4	4	0	12	92	4.34179e-15	1.13755e-10	1.09309e-10	1.1087e-13
Glyma.18G135700	12	0	0	0	0	0	0	12	15	12	0	0	18	0	0	0	15	0	0	0	0	9	6	0	18	6	0	0	0	18	105	4.34593e-15	1.13863e-10	1.09404e-10	1.1087e-13
Glyma.18G155550	13	2	3	4	4	0	0	5	4	5	3	3	6	3	3	3	6	3	2	2	5	3	5	4	3	2	3	2	3	12	92	4.34179e-15	1.13755e-10	1.09309e-10	1.1087e-13
Glyma.02G139200	0	0	0	0	8	0	8	8	8	8	0	4	8	0	0	0	8	0	4	0	0	8	4	8	4	4	8	4	0	12	92	4.34179e-15	1.13755e-10	1.09309e-10	1.1087e-13
Glyma.03G069400	12	0	0	0	3	0	0	6	12	6	0	6	12	0	6	0	12	0	0	0	0	9	6	0	12	12	6	3	0	18	105	4.34592e-15	1.13863e-10	1.09404e-10	1.1087e-13
Glyma.01G123201	6	0	1	0	2	0	7	6	6	6	0	0	3	0	4	0	7	0	0	3	0	4	2	4	5	3	4	0	0	3	70	4.44286e-15	1.16403e-10	1.11836e-10	1.13122e-13
Glyma.03G034300	3	0	2	0	6	0	0	7	3	7	0	2	1	0	2	0	5	1	1	2	0	5	2	2	8	8	5	1	0	3	70	4.44286e-15	1.16403e-10	1.11836e-10	1.13122e-13
Glyma.02G184800	8	0	0	0	6	0	2	10	9	10	0	2	5	1	2	0	4	0	0	1	0	6	1	2	8	6	4	0	0	7	80	5.01952e-15	1.31512e-10	1.26346e-10	1.27496e-13
Glyma.06G165200	15	0	5	0	5	0	0	5	5	5	0	0	5	0	5	0	5	0	0	0	0	0	0	5	5	5	5	5	0	5	75	5.02686e-15	1.31704e-10	1.26516e-10	1.27496e-13
Glyma.07G133400	5	0	0	0	5	0	0	5	5	5	0	0	5	0	5	0	15	0	0	0	0	5	5	0	5	5	5	5	0	5	75	5.02686e-15	1.31704e-10	1.26516e-10	1.27496e-13
Glyma.18G090100	15	0	0	0	0	0	0	0	15	0	0	0	5	0	10	0	5	0	0	0	0	5	0	10	5	5	0	5	0	5	75	5.02686e-15	1.31704e-10	1.26516e-10	1.27496e-13
Glyma.06G325500	6	0	2	2	5	0	0	5	6	5	3	3	8	2	3	0	9	2	1	2	2	9	6	3	6	7	6	5	2	14	96	5.35018e-15	1.40175e-10	1.34648e-10	1.35566e-13
Glyma.02G185750	4	0	0	0	6	0	5	7	7	7	0	0	1	0	1	0	0	0	0	0	0	6	1	2	5	7	5	1	0	1	64	5.53184e-15	1.44934e-10	1.39214e-10	1.40033e-13
Glyma.09G032200	4	0	2	0	4	0	0	4	8	4	0	0	4	0	4	0	8	2	0	0	0	4	4	4	8	8	2	2	0	4	72	6.1841e-15	1.62023e-10	1.55592e-10	1.55642e-13
Glyma.10G158700	6	0	4	0	6	0	0	4	6	4	0	4	0	4	0	0	6	0	0	2	0	4	6	6	4	4	4	2	0	4	72	6.1841e-15	1.62023e-10	1.55592e-10	1.55642e-13
Glyma.11G156900	12	0	0	0	4	0	0	4	4	4	0	0	4	0	4	0	16	0	0	4	0	0	4	4	4	4	4	0	0	4	72	6.1841e-15	1.62023e-10	1.55592e-10	1.55642e-13
Glyma.02G082100	12	0	0	0	0	0	4	4	12	4	0	0	4	0	4	0	4	0	0	4	0	4	4	4	8	0	0	4	0	4	72	6.1841e-15	1.62023e-10	1.55592e-10	1.55642e-13
Glyma.04G122600	8	0	4	0	0	0	0	0	8	0	0	4	0	0	8	0	4	4	0	0	4	4	8	4	8	0	8	0	0	4	72	6.1841e-15	1.62023e-10	1.55592e-10	1.55642e-13
Glyma.06G290100	3	0	1	0	3	0	0	3	6	3	0	1	3	3	6	0	6	3	0	1	0	6	6	3	6	5	5	3	0	4	72	6.1841e-15	1.62023e-10	1.55592e-10	1.55642e-13
Glyma.15G219200	8	0	0	0	4	0	0	12	4	12	0	4	12	4	4	4	12	0	0	0	0	12	0	4	8	4	4	4	0	16	100	6.22988e-15	1.63223e-10	1.56737e-10	1.56644e-13
Glyma.10G234100	6	0	0	0	6	0	0	6	0	6	0	3	0	0	0	0	6	3	0	6	0	6	6	0	6	6	6	0	0	3	69	7.35785e-15	1.92776e-10	1.85087e-10	1.84298e-13
Glyma.16G095700	6	0	0	0	3	0	0	3	18	3	0	0	3	0	3	0	9	0	0	3	0	0	6	0	9	6	0	0	0	3	69	7.35785e-15	1.92776e-10	1.85087e-10	1.84298e-13
Glyma.14G111900	0	0	0	0	3	0	0	9	3	9	0	0	3	0	3	0	3	0	0	0	0	3	9	3	15	3	3	3	0	3	69	7.35785e-15	1.92776e-10	1.85087e-10	1.84298e-13
Glyma.18G068800	0	0	0	0	16	0	0	0	20	0	0	0	20	0	4	4	16	0	0	4	0	0	4	0	28	8	4	0	0	20	108	7.35785e-15	1.92776e-10	1.85087e-10	1.84298e-13
Glyma.03G037300	3	0	0	0	0	0	0	3	27	3	0	3	6	0	9	0	9	0	0	0	0	3	3	12	3	3	3	3	0	9	84	7.41838e-15	1.94362e-10	1.86595e-10	1.8546e-13
Glyma.16G143000	12	0	0	0	3	0	0	9	9	9	0	3	6	3	9	0	3	0	0	3	0	3	3	3	6	3	3	3	0	9	84	7.41838e-15	1.94362e-10	1.86595e-10	1.8546e-13
Glyma.14G107600	8	0	0	0	6	0	0	8	12	8	2	0	22	2	6	0	20	2	0	2	0	4	6	4	10	12	6	0	0	24	116	7.5198e-15	1.97019e-10	1.89138e-10	1.87816e-13
Glyma.07G165700	13	0	0	0	5	0	0	11	7	11	0	0	13	1	2	0	8	1	0	2	0	6	5	1	14	4	2	0	0	13	93	7.83086e-15	2.05168e-10	1.9693e-10	1.94842e-13
Glyma.15G248550	13	0	2	5	5	0	0	3	7	3	1	5	7	5	5	1	12	4	1	3	0	2	3	4	5	4	1	3	2	13	93	7.83086e-15	2.05168e-10	1.9693e-10	1.94842e-13
Glyma.18G141000	6	0	0	0	6	0	0	7	11	7	0	1	12	1	4	0	6	0	0	0	0	8	9	1	12	10	5	0	0	13	93	7.83086e-15	2.05168e-10	1.9693e-10	1.94842e-13
Glyma.19G067400	13	0	0	0	0	0	0	3	10	3	0	0	13	0	4	0	13	0	0	3	0	9	6	0	13	11	5	0	0	13	93	7.83086e-15	2.05168e-10	1.9693e-10	1.94842e-13
Glyma.12G187700	2	0	0	0	2	0	0	6	6	6	0	0	2	0	0	0	6	0	0	0	0	2	2	8	8	8	8	2	0	2	66	8.41693e-15	2.20524e-10	2.11644e-10	2.08829e-13
Glyma.04G180900	6	0	0	0	2	0	0	8	4	8	0	0	2	0	0	0	8	6	0	0	0	6	0	0	8	8	2	0	0	2	66	8.41693e-15	2.20524e-10	2.11644e-10	2.08829e-13
Glyma.07G034300	4	0	2	0	0	0	0	4	4	4	0	2	0	2	6	0	4	2	0	4	0	6	0	4	6	6	6	2	0	2	66	8.41693e-15	2.20524e-10	2.11644e-10	2.08829e-13
Glyma.12G084300	14	0	0	0	4	0	0	10	8	10	0	2	8	0	2	0	8	0	0	2	0	8	2	0	8	6	4	0	0	10	86	8.71558e-15	2.28348e-10	2.19136e-10	2.1583e-13
Glyma.17G182300	5	3	2	2	3	0	0	6	3	6	2	4	4	4	3	3	8	2	2	3	2	4	3	5	3	5	4	3	2	10	86	8.71558e-15	2.28348e-10	2.19136e-10	2.1583e-13
Glyma.01G110200	4	0	0	0	3	4	5	5	4	5	0	0	0	1	1	0	5	0	0	1	0	4	2	2	5	4	3	2	0	0	60	9.48574e-15	2.48526e-10	2.38358e-10	2.31618e-13
Glyma.06G203100	12	0	0	0	0	0	0	0	0	0	0	0	0	0	0	0	0	0	0	0	0	12	12	12	12	0	0	0	0	0	60	9.48574e-15	2.48526e-10	2.38358e-10	2.31618e-13
Glyma.10G086600	4	0	0	0	4	0	0	8	4	8	0	0	0	0	0	0	4	0	0	0	0	4	4	4	4	8	4	0	0	0	60	9.48574e-15	2.48526e-10	2.38358e-10	2.31618e-13
Glyma.10G165600	4	0	4	0	4	0	0	4	4	4	0	0	0	0	0	0	4	0	0	0	4	4	4	4	4	4	4	4	0	0	60	9.48574e-15	2.48526e-10	2.38358e-10	2.31618e-13
Glyma.11G154300	20	0	0	0	0	0	0	0	0	0	0	0	0	0	0	0	20	0	0	0	0	0	0	0	20	0	0	0	0	0	60	9.48574e-15	2.48526e-10	2.38358e-10	2.31618e-13
Glyma.12G004000	6	0	0	0	6	0	0	6	0	6	0	0	0	0	0	0	6	0	0	0	0	6	6	0	6	6	6	0	0	0	60	9.48574e-15	2.48526e-10	2.38358e-10	2.31618e-13
Glyma.19G113700	5	0	0	0	0	0	0	0	0	0	0	0	0	0	0	0	10	0	0	0	0	10	5	0	5	15	10	0	0	0	60	9.48574e-15	2.48526e-10	2.38358e-10	2.31618e-13
Glyma.20G075100	9	0	0	0	3	0	0	0	9	0	0	0	0	0	0	0	3	0	0	3	0	6	3	0	9	9	6	0	0	0	60	9.48574e-15	2.48526e-10	2.38358e-10	2.31618e-13
Glyma.20G076400	10	0	0	0	10	0	0	0	10	0	0	0	0	0	0	0	0	0	0	0	0	10	0	0	10	10	0	0	0	0	60	9.48574e-15	2.48526e-10	2.38358e-10	2.31618e-13
Glyma.20G109150	16	0	0	0	12	0	0	0	0	0	0	0	0	0	0	0	4	0	0	0	0	0	4	0	16	4	4	0	0	0	60	9.48574e-15	2.48526e-10	2.38358e-10	2.31618e-13
Glyma.14G213300	0	0	4	0	0	0	0	8	0	8	0	0	0	0	8	0	8	4	0	4	0	0	8	8	0	0	0	0	0	0	60	9.48574e-15	2.48526e-10	2.38358e-10	2.31618e-13
Glyma.16G065000	0	0	0	0	3	0	0	9	9	9	0	0	0	0	3	0	12	0	0	0	0	3	0	0	9	3	0	0	0	0	60	9.48574e-15	2.48526e-10	2.38358e-10	2.31618e-13
Glyma.01G128300	0	0	0	0	0	0	6	6	6	6	0	0	0	0	0	0	0	0	0	0	6	0	6	6	0	6	6	6	0	0	60	9.48574e-15	2.48526e-10	2.38358e-10	2.31618e-13
Glyma.14G035400	0	0	0	0	0	0	0	16	0	16	0	0	0	12	0	0	12	4	0	0	0	0	0	0	0	0	0	0	0	0	60	9.48574e-15	2.48526e-10	2.38358e-10	2.31618e-13
Glyma.12G192700	0	0	0	0	0	0	0	0	0	0	0	0	0	0	0	0	6	6	0	12	0	0	6	6	0	12	12	0	0	0	60	9.48574e-15	2.48526e-10	2.38358e-10	2.31618e-13
Glyma.15G026500	0	0	0	0	11	0	0	0	0	0	0	0	11	0	11	0	0	0	0	0	11	11	0	0	11	11	11	11	0	11	88	1.00366e-14	2.6296e-10	2.52191e-10	2.44842e-13
Glyma.02G186950	9	0	0	0	6	0	7	7	8	7	0	1	3	0	1	0	1	0	0	0	0	5	1	1	9	7	2	0	0	4	71	1.02196e-14	2.67754e-10	2.56778e-10	2.49073e-13
Glyma.05G167100	8	0	0	0	4	0	0	6	6	6	0	0	6	0	4	0	8	0	0	4	0	4	4	4	6	8	2	2	0	6	76	1.07372e-14	2.81315e-10	2.69761e-10	2.61202e-13
Glyma.05G232700	6	0	2	0	6	0	0	6	6	6	0	4	2	4	4	0	2	0	0	6	0	0	6	4	6	6	6	0	0	6	76	1.07372e-14	2.81315e-10	2.69761e-10	2.61202e-13
Glyma.06G197700	6	0	0	0	6	0	0	6	6	6	0	6	6	6	6	0	6	6	0	0	0	6	6	6	6	6	6	0	0	12	90	1.13489e-14	2.97341e-10	2.85095e-10	2.75315e-13
Glyma.15G172700	12	0	0	0	6	0	0	0	12	0	0	0	12	6	6	0	0	0	0	0	12	12	0	0	12	6	6	0	0	12	90	1.13489e-14	2.9734e-10	2.85095e-10	2.75315e-13
Glyma.16G080900	12	0	0	0	6	0	0	0	12	0	0	0	12	3	9	3	12	0	0	3	0	0	3	0	9	9	9	0	0	12	90	1.13489e-14	2.9734e-10	2.85095e-10	2.75315e-13
Glyma.06G237432	6	0	1	0	8	0	0	6	9	6	0	2	5	1	5	0	5	0	0	4	0	4	4	2	7	5	5	0	0	7	78	1.34972e-14	3.53628e-10	3.39051e-10	3.2713e-13
Glyma.07G211500	6	0	6	0	6	0	0	6	6	6	0	6	8	4	6	0	6	0	0	6	0	6	6	6	6	8	2	2	0	14	94	1.38208e-14	3.62106e-10	3.47166e-10	3.34664e-13
Glyma.01G129000	3	0	1	0	2	0	5	6	6	6	0	0	2	0	0	0	7	2	0	0	0	6	3	3	4	6	5	0	0	2	65	1.39653e-14	3.6589e-10	3.50779e-10	3.37848e-13
Glyma.02G243400	5	0	5	0	5	0	0	5	5	5	0	5	5	0	5	0	5	0	0	5	0	5	10	5	5	5	5	5	0	10	85	1.41674e-14	3.71186e-10	3.55842e-10	3.42422e-13
Glyma.04G115300	6	0	0	0	1	0	0	1	6	1	0	0	1	1	6	0	6	0	0	1	0	6	6	3	6	6	5	1	0	1	62	1.52666e-14	3.99984e-10	3.83435e-10	3.68649e-13
Glyma.01G241400	5	1	0	0	0	0	5	5	0	5	0	0	0	4	0	0	5	2	0	3	0	0	5	0	5	5	5	4	0	0	59	1.57672e-14	4.13101e-10	3.95993e-10	3.80387e-13
Glyma.12G073300	4	0	4	0	4	0	0	4	4	4	0	4	4	0	4	0	4	8	0	4	0	4	0	4	4	12	8	4	0	8	80	1.65128e-14	4.32634e-10	4.14635e-10	3.96548e-13
Glyma.18G061100	4	0	0	0	0	0	0	12	4	12	0	4	4	0	4	0	8	0	0	0	0	8	8	4	4	8	4	0	0	8	80	1.65128e-14	4.32634e-10	4.14635e-10	3.96548e-13
Glyma.04G115500	6	0	0	0	4	0	0	2	6	2	0	4	4	2	4	0	12	2	0	4	0	6	4	6	8	8	4	0	0	8	80	1.65128e-14	4.32634e-10	4.14635e-10	3.96548e-13
Glyma.06G212200	6	0	0	0	6	0	0	9	7	9	0	1	7	0	3	0	9	1	0	0	0	5	5	4	6	6	3	1	0	8	80	1.65128e-14	4.32634e-10	4.14635e-10	3.96548e-13
Glyma.06G225500	4	0	0	0	4	0	0	8	4	8	0	4	4	4	4	0	8	4	0	0	0	4	4	0	8	8	8	0	0	8	80	1.65128e-14	4.32634e-10	4.14635e-10	3.96548e-13
Glyma.13G211800	6	0	0	0	0	0	0	6	6	6	0	2	2	2	0	0	4	0	0	6	0	6	6	6	6	6	2	2	0	4	70	1.68881e-14	4.42468e-10	4.24043e-10	4.05191e-13
Glyma.16G172500	18	0	0	0	27	0	0	0	0	0	0	18	54	18	27	0	9	18	0	9	0	27	9	0	0	9	18	9	0	72	198	1.74541e-14	4.57298e-10	4.38238e-10	4.18388e-13
Glyma.04G165600	6	0	0	0	3	0	0	3	6	3	0	0	6	0	0	0	24	0	0	0	0	21	0	0	6	3	0	0	0	6	75	1.76524e-14	4.62492e-10	4.43145e-10	4.21597e-13
Glyma.06G071200	6	0	0	0	6	0	0	6	6	6	0	0	6	6	6	0	9	0	0	6	0	6	0	0	6	6	0	0	0	6	75	1.76524e-14	4.62492e-10	4.43145e-10	4.21597e-13
Glyma.12G083000	6	0	0	0	6	0	0	6	6	6	0	0	6	0	6	0	6	0	0	3	0	6	0	0	6	6	6	0	6	6	75	1.76524e-14	4.62492e-10	4.43145e-10	4.21597e-13
Glyma.14G144100	6	0	0	0	6	0	0	6	9	6	0	0	6	0	3	0	15	0	0	3	0	0	3	0	9	6	0	3	0	6	75	1.76524e-14	4.62492e-10	4.43145e-10	4.21597e-13
Glyma.08G352650	7	1	1	0	4	0	0	5	7	5	2	3	4	2	3	0	5	3	1	1	2	3	5	5	7	8	5	1	1	9	82	1.97141e-14	5.16509e-10	4.94883e-10	4.70409e-13
Glyma.12G155900	7	0	0	0	7	0	0	7	7	7	0	0	7	0	0	0	7	0	0	0	0	7	7	0	7	7	0	7	0	7	77	2.21263e-14	5.7971e-10	5.55393e-10	5.27009e-13
Glyma.06G219901	6	0	0	0	7	0	0	8	7	8	0	0	7	0	5	0	7	0	0	1	0	4	4	2	7	6	2	3	0	7	77	2.21263e-14	5.7971e-10	5.55393e-10	5.27009e-13
Glyma.05G084600	8	0	0	4	4	0	0	4	12	4	2	3	9	8	8	2	9	1	1	0	2	1	4	7	8	5	1	0	0	14	93	2.21965e-14	5.81548e-10	5.5711e-10	5.27721e-13
Glyma.19G059501	10	0	2	0	2	0	0	3	11	3	4	2	8	0	5	0	7	2	0	3	0	9	7	0	10	9	7	3	0	14	93	2.21965e-14	5.81548e-10	5.5711e-10	5.27721e-13
Glyma.03G027900	8	0	2	0	6	0	0	6	8	6	0	4	6	2	4	4	6	2	0	2	0	6	6	4	6	6	0	0	0	10	84	2.30214e-14	6.0316e-10	5.7779e-10	5.46836e-13
Glyma.18G242700	6	0	2	0	2	0	0	6	2	6	0	0	2	0	6	0	2	2	0	2	0	2	4	2	4	6	6	2	2	2	64	2.31728e-14	6.07126e-10	5.8152e-10	5.48939e-13
Glyma.01G132000	6	0	0	0	6	0	2	6	6	6	0	0	2	0	6	0	6	2	0	2	0	6	2	0	2	2	2	2	0	2	64	2.31728e-14	6.07126e-10	5.8152e-10	5.48939e-13
Glyma.07G039600	4	0	2	0	0	0	0	4	4	4	0	2	0	4	4	0	6	4	0	2	0	6	0	4	6	4	6	0	0	2	64	2.31728e-14	6.07126e-10	5.8152e-10	5.48939e-13
Glyma.20G217700	5	0	0	0	5	0	0	10	10	10	0	5	10	5	5	0	10	0	0	0	5	5	5	5	5	5	5	0	0	15	95	2.38978e-14	6.26121e-10	5.9969e-10	5.65602e-13
Glyma.01G121300	4	0	0	0	3	4	7	6	5	6	0	0	1	0	1	0	7	0	0	3	0	0	4	1	8	1	1	0	0	1	61	2.53661e-14	6.64591e-10	6.36511e-10	5.99812e-13
Glyma.19G192600	6	0	0	0	6	0	0	6	6	6	0	0	0	0	0	0	4	0	0	0	0	4	2	2	4	6	2	4	0	0	58	2.62118e-14	6.86749e-10	6.5768e-10	6.18692e-13
Glyma.02G185200	10	0	0	0	6	0	0	8	6	8	0	0	0	2	0	0	0	0	0	0	0	0	0	4	10	2	2	0	0	0	58	2.62118e-14	6.86749e-10	6.5768e-10	6.18692e-13
Glyma.10G271000	4	0	0	0	7	0	0	8	8	8	0	2	9	4	6	0	9	1	0	0	0	2	7	4	9	8	1	0	0	11	86	2.63495e-14	6.90357e-10	6.61083e-10	6.20825e-13
Glyma.18G154600	11	0	1	0	5	0	0	8	8	8	0	0	11	0	2	0	11	0	0	2	0	4	4	1	8	7	4	2	0	11	86	2.63495e-14	6.90357e-10	6.61083e-10	6.20825e-13
Glyma.05G091100	12	0	0	0	8	0	0	16	11	16	0	0	27	0	3	0	16	0	0	1	0	6	4	0	15	8	3	0	0	27	119	2.65794e-14	6.9638e-10	6.66824e-10	6.25678e-13
Glyma.13G029100	7	1	2	2	3	0	0	4	7	4	3	2	3	2	2	2	6	2	2	3	2	4	4	2	6	4	5	2	1	8	79	2.69889e-14	7.07108e-10	6.7707e-10	6.34747e-13
Glyma.19G064300	15	0	0	0	2	0	0	3	13	3	1	0	17	0	2	0	14	0	0	1	0	7	8	0	13	13	7	0	0	18	101	2.77086e-14	7.25966e-10	6.95098e-10	6.5109e-13
Glyma.13G028500	8	0	1	0	6	0	0	16	11	16	0	1	18	0	5	0	8	0	0	1	0	2	6	1	12	6	4	0	0	19	103	2.84898e-14	7.46433e-10	7.14667e-10	6.68847e-13
Glyma.02G156400	16	0	2	0	4	0	2	8	4	8	0	2	4	0	0	0	2	0	0	2	0	4	2	2	16	2	0	0	0	6	74	2.9017e-14	7.60245e-10	7.27746e-10	6.78184e-13
Glyma.09G146800	5	0	1	0	5	0	0	8	5	8	0	1	5	0	4	0	5	2	0	5	0	5	3	2	8	4	4	0	0	6	74	2.9017e-14	7.60245e-10	7.27746e-10	6.78184e-13
Glyma.09G154500	6	0	0	0	6	0	0	6	6	6	0	0	6	2	6	0	8	6	0	0	0	2	0	2	6	8	4	0	0	6	74	2.9017e-14	7.60245e-10	7.27746e-10	6.78184e-13
Glyma.12G182500	15	0	0	0	15	0	0	20	0	20	0	0	20	0	0	0	0	0	0	0	0	0	5	0	25	5	0	0	0	20	105	2.9017e-14	7.60245e-10	7.27746e-10	6.78184e-13
Glyma.15G130700	20	0	0	0	0	0	0	0	5	0	0	0	20	0	15	0	20	0	0	0	0	15	0	0	0	15	15	0	0	20	105	2.9017e-14	7.60245e-10	7.27746e-10	6.78184e-13
Glyma.10G073300	12	0	0	0	4	0	0	4	8	4	0	0	12	0	0	0	12	0	0	0	0	8	4	0	12	12	8	0	0	12	88	2.96131e-14	7.75863e-10	7.42518e-10	6.88432e-13
Glyma.11G171400	6	0	0	0	4	0	0	12	10	12	0	2	10	0	4	0	10	0	0	6	0	2	0	2	14	4	2	0	0	12	88	2.96131e-14	7.75863e-10	7.42518e-10	6.88432e-13
Glyma.15G160700	8	0	0	0	0	0	0	8	8	8	0	0	12	0	8	0	8	4	0	0	0	4	4	8	8	8	4	0	0	12	88	2.96131e-14	7.75863e-10	7.42518e-10	6.88432e-13
Glyma.03G221350	12	0	0	0	12	0	0	0	0	0	0	0	12	0	0	0	12	0	0	8	0	0	0	8	12	12	12	0	0	12	88	2.96131e-14	7.75863e-10	7.42518e-10	6.88432e-13
Glyma.04G146000	12	0	0	0	4	0	0	10	10	10	0	0	12	0	6	0	16	0	0	2	0	2	2	0	10	4	0	0	0	12	88	2.96131e-14	7.75863e-10	7.42518e-10	6.88432e-13
Glyma.06G221650	10	0	0	0	6	0	0	8	4	8	0	0	12	0	4	0	10	0	0	2	0	4	8	2	8	8	2	4	0	12	88	2.96131e-14	7.75863e-10	7.42518e-10	6.88432e-13
Glyma.17G211700	9	0	0	0	0	0	0	9	0	9	0	6	3	0	0	0	9	0	0	6	0	9	0	6	9	9	6	0	0	9	81	3.21226e-14	8.41611e-10	8.05313e-10	7.4413e-13
Glyma.19G056400	12	0	0	0	0	0	0	0	12	0	0	0	9	0	3	0	6	0	0	9	0	9	6	0	9	9	6	0	0	9	81	3.21226e-14	8.41611e-10	8.05313e-10	7.4413e-13
Glyma.20G050500	12	0	0	0	3	0	0	9	3	9	0	0	9	0	0	0	9	0	0	0	0	9	0	0	24	3	0	0	0	9	81	3.21226e-14	8.41611e-10	8.05313e-10	7.4413e-13
Glyma.03G041600	6	0	0	0	6	0	0	6	6	6	0	3	6	3	6	0	6	0	3	0	0	6	6	3	6	6	6	0	0	9	81	3.21226e-14	8.41611e-10	8.05313e-10	7.4413e-13
Glyma.08G317900	9	0	3	0	0	0	0	6	0	6	0	3	0	0	0	0	15	0	3	0	0	6	0	0	6	6	6	0	0	3	66	3.34264e-14	8.75773e-10	8.379e-10	7.72286e-13
Glyma.13G003300	6	0	3	0	0	0	0	0	12	0	0	3	0	3	0	0	6	3	0	3	0	6	6	6	3	3	3	3	0	3	66	3.34264e-14	8.75773e-10	8.379e-10	7.72286e-13
Glyma.14G064150	3	0	0	0	3	0	0	12	12	12	0	0	3	3	3	0	3	0	0	0	0	3	0	3	3	3	3	0	0	3	66	3.34264e-14	8.75773e-10	8.379e-10	7.72286e-13
Glyma.04G105900	7	0	0	1	2	0	0	5	6	5	0	1	6	0	3	0	9	0	0	1	0	7	4	1	8	10	1	6	0	7	76	3.62647e-14	9.50134e-10	9.0901e-10	8.37123e-13
Glyma.03G039700	7	0	1	0	4	0	0	7	4	7	0	1	9	1	2	0	6	0	0	3	0	6	4	7	7	10	6	1	0	10	83	3.73951e-14	9.79751e-10	9.37308e-10	8.62457e-13
Glyma.09G092700	0	0	0	0	8	0	0	9	10	9	0	2	0	0	0	0	0	0	0	0	0	8	0	1	7	6	5	0	0	2	63	3.8454e-14	1.0075e-09	9.63812e-10	8.861e-13
Glyma.13G117500	0	0	4	0	0	0	0	12	0	12	0	0	16	0	16	0	16	0	0	0	0	16	4	0	4	0	12	0	0	16	96	4.05277e-14	1.06183e-09	1.01562e-09	9.3061e-13
Glyma.07G102700	0	0	0	0	0	0	0	16	0	16	0	0	16	0	8	0	12	4	4	0	0	8	0	4	0	12	8	4	0	16	96	4.05277e-14	1.06183e-09	1.01562e-09	9.3061e-13
Glyma.11G254400	0	0	0	0	0	0	0	16	0	16	0	16	0	16	16	0	0	0	0	0	0	16	16	0	0	0	0	0	0	16	96	4.05277e-14	1.06183e-09	1.01562e-09	9.3061e-13
Glyma.01G076200	12	0	0	0	6	6	6	8	10	8	0	0	16	0	4	0	10	0	0	0	0	6	0	0	12	4	4	0	0	16	96	4.05277e-14	1.06183e-09	1.01562e-09	9.3061e-13
Glyma.18G129700	14	0	0	0	1	0	0	18	1	18	0	0	1	0	1	0	1	0	0	1	0	1	1	0	1	1	1	0	0	1	60	4.2152e-14	1.10438e-09	1.05629e-09	9.6706e-13
Glyma.18G138200	6	0	0	0	6	0	0	5	9	5	0	1	10	0	5	0	8	1	0	0	0	8	4	2	9	10	5	2	0	11	85	4.26676e-14	1.11789e-09	1.06916e-09	9.78031e-13
Glyma.20G109000	9	0	0	0	9	0	0	0	0	0	0	0	0	0	0	0	9	0	0	6	0	0	3	0	9	9	3	0	0	0	57	4.35812e-14	1.14183e-09	1.09188e-09	9.9549e-13
Glyma.09G099900	0	0	0	0	3	0	0	6	0	6	0	0	0	3	0	0	0	3	0	6	0	3	3	0	9	3	6	6	0	0	57	4.35812e-14	1.14183e-09	1.09188e-09	9.9549e-13
Glyma.01G128700	0	0	0	0	0	0	9	6	6	6	0	0	0	3	0	0	6	0	0	0	0	3	0	0	0	9	9	0	0	0	57	4.35812e-14	1.14183e-09	1.09188e-09	9.9549e-13
Glyma.16G093800	0	0	0	0	0	0	0	0	38	0	0	0	0	0	0	0	19	0	0	0	0	0	0	0	0	0	0	0	0	0	57	4.35812e-14	1.14183e-09	1.09188e-09	9.9549e-13
Glyma.01G079300	8	0	0	0	8	8	6	6	8	6	0	0	8	0	2	0	4	0	0	0	0	4	4	0	6	6	2	0	0	8	78	4.40996e-14	1.15541e-09	1.10465e-09	1.00296e-12
Glyma.03G071101	8	0	0	0	2	0	0	10	6	10	0	0	8	0	4	0	12	0	0	0	0	4	2	2	10	6	2	0	0	8	78	4.40996e-14	1.15541e-09	1.10465e-09	1.00296e-12
Glyma.10G102000	16	0	2	0	6	0	0	4	6	4	0	0	8	2	2	0	6	0	0	0	0	6	2	2	12	4	2	2	0	8	78	4.40996e-14	1.15541e-09	1.10465e-09	1.00296e-12
Glyma.17G179500	6	0	0	0	6	0	0	10	10	10	0	0	8	0	2	0	12	0	0	0	0	6	0	0	10	4	2	0	0	8	78	4.40996e-14	1.15541e-09	1.10465e-09	1.00296e-12
Glyma.18G124800	10	0	0	0	2	0	0	6	6	6	0	2	6	0	4	0	8	0	0	4	2	6	2	4	8	6	4	0	0	8	78	4.40996e-14	1.15541e-09	1.10465e-09	1.00296e-12
Glyma.15G208600	8	2	0	0	10	0	0	6	18	6	0	0	24	0	4	0	16	0	0	0	0	8	0	2	8	14	10	0	0	24	112	4.49044e-14	1.1765e-09	1.12477e-09	1.02038e-12
Glyma.07G168600	16	0	0	0	4	0	0	20	4	20	0	0	20	0	8	0	4	0	0	0	0	4	0	0	16	4	4	0	0	20	104	4.57794e-14	1.19942e-09	1.14659e-09	1.03846e-12
Glyma.08G278000	4	0	0	0	4	0	0	12	12	12	0	4	16	0	4	0	16	0	0	0	0	0	4	4	16	16	0	0	0	20	104	4.57794e-14	1.19942e-09	1.14659e-09	1.03846e-12
Glyma.11G162600	10	0	0	0	6	0	0	4	4	4	0	0	4	0	2	0	12	0	0	2	0	2	4	0	8	4	4	2	0	4	68	4.61144e-14	1.2082e-09	1.15494e-09	1.04515e-12
Glyma.18G146100	8	0	0	0	7	0	0	4	9	4	0	1	8	0	4	0	7	0	0	0	0	6	5	1	9	8	7	1	0	9	80	5.23244e-14	1.3709e-09	1.31041e-09	1.18487e-12
Glyma.07G172000	14	0	0	0	7	0	0	7	0	7	0	7	7	0	7	0	7	0	0	0	0	7	0	0	14	7	14	0	0	14	91	5.71592e-14	1.49757e-09	1.43138e-09	1.29212e-12
Glyma.20G210700	7	0	0	0	7	0	0	7	7	7	0	7	7	7	7	0	7	0	0	0	0	7	0	7	7	7	7	0	0	14	91	5.71592e-14	1.49757e-09	1.43138e-09	1.29212e-12
Glyma.03G044300	8	0	1	0	5	0	0	7	6	7	0	3	4	4	4	0	6	0	0	4	0	5	1	4	6	3	2	2	0	7	75	5.94245e-14	1.55692e-09	1.48805e-09	1.34217e-12
Glyma.01G191300	5	0	5	0	5	0	5	0	5	0	0	5	0	0	0	0	5	0	0	5	0	0	5	5	5	5	10	5	0	5	70	6.11696e-14	1.60264e-09	1.53126e-09	1.37213e-12
Glyma.06G259800	5	0	0	0	5	0	0	0	10	0	0	5	0	0	5	0	5	0	0	0	0	5	5	5	5	10	5	5	0	5	70	6.11696e-14	1.60264e-09	1.53126e-09	1.37213e-12
Glyma.08G214300	5	0	0	0	0	0	0	5	5	5	0	0	5	5	5	0	15	0	0	0	0	5	5	0	5	5	5	0	0	5	70	6.11696e-14	1.60264e-09	1.53126e-09	1.37213e-12
Glyma.09G077900	15	0	0	0	5	0	0	5	5	5	0	0	5	0	5	0	5	0	5	0	0	5	0	0	5	10	0	0	0	5	70	6.11696e-14	1.60264e-09	1.53126e-09	1.37213e-12
Glyma.10G142500	5	0	5	0	5	0	0	5	5	5	0	5	0	0	0	0	5	0	0	0	0	5	5	5	5	5	5	5	0	5	70	6.11696e-14	1.60264e-09	1.53126e-09	1.37213e-12
Glyma.10G281600	5	0	5	0	5	0	0	5	5	5	0	0	5	0	5	0	5	0	0	0	0	5	5	5	5	5	5	0	0	5	70	6.11696e-14	1.60264e-09	1.53126e-09	1.37213e-12
Glyma.13G041200	5	0	0	0	5	0	0	10	5	10	0	0	5	0	5	0	5	0	0	0	0	5	5	0	5	5	5	0	0	5	70	6.11696e-14	1.60264e-09	1.53126e-09	1.37213e-12
Glyma.13G064000	11	0	2	0	2	0	0	8	5	8	0	1	4	0	2	0	6	0	0	1	0	2	1	1	6	10	1	4	0	5	70	6.11696e-14	1.60264e-09	1.53126e-09	1.37213e-12
Glyma.20G073000	9	0	2	0	5	0	0	1	7	1	0	1	1	0	1	0	3	0	0	2	0	5	5	3	6	8	4	0	0	2	62	6.38178e-14	1.67203e-09	1.5973e-09	1.42664e-12
Glyma.02G183950	0	0	0	0	0	0	0	6	14	6	0	2	0	0	0	0	0	0	0	0	0	6	6	6	0	12	6	0	0	2	62	6.38178e-14	1.67203e-09	1.5973e-09	1.42664e-12
Glyma.02G185500	2	0	0	0	8	0	4	8	8	8	0	0	2	0	2	0	2	0	0	0	0	4	2	0	2	6	6	0	0	2	62	6.38178e-14	1.67203e-09	1.5973e-09	1.42664e-12
Glyma.03G171500	6	0	2	0	2	0	0	4	6	4	0	0	2	0	2	0	6	0	0	2	0	4	4	2	6	6	6	0	0	2	62	6.38178e-14	1.67203e-09	1.5973e-09	1.42664e-12
Glyma.07G078900	14	0	0	0	14	0	0	0	0	0	0	0	0	0	0	0	0	0	0	0	0	0	0	0	14	14	0	0	0	0	56	7.2471e-14	1.89874e-09	1.81322e-09	1.60774e-12
Glyma.09G242400	8	0	4	0	0	0	0	0	0	0	0	0	0	0	0	0	0	4	0	0	0	0	8	0	8	8	8	8	0	0	56	7.2471e-14	1.89874e-09	1.81323e-09	1.60774e-12
Glyma.11G154100	16	0	0	0	0	0	0	0	0	0	0	0	0	0	0	0	16	0	0	0	0	0	8	0	16	0	0	0	0	0	56	7.2471e-14	1.89874e-09	1.81323e-09	1.60774e-12
Glyma.14G073100	7	0	0	0	0	0	0	0	14	0	0	0	0	0	0	0	7	0	0	0	0	7	7	7	7	0	0	0	0	0	56	7.2471e-14	1.89874e-09	1.81323e-09	1.60774e-12
Glyma.14G199000	8	0	0	0	0	0	0	8	0	8	0	0	0	0	4	0	4	0	0	4	0	8	0	4	8	0	0	0	0	0	56	7.2471e-14	1.89874e-09	1.81323e-09	1.60774e-12
Glyma.08G039500	0	0	0	0	8	0	0	8	0	8	0	0	0	0	0	0	8	8	0	0	0	0	0	0	0	8	8	0	0	0	56	7.2471e-14	1.89874e-09	1.81323e-09	1.60774e-12
Glyma.03G053500	0	0	0	0	0	0	0	0	12	0	0	0	0	0	0	0	20	0	0	0	0	0	0	2	0	14	8	0	0	0	56	7.2471e-14	1.89874e-09	1.81323e-09	1.60774e-12
Glyma.10G213300	0	0	0	0	0	0	0	0	7	0	0	0	0	0	0	0	7	7	0	0	0	7	7	7	7	0	7	0	0	0	56	7.2471e-14	1.89874e-09	1.81323e-09	1.60774e-12
Glyma.19G026600	0	0	0	0	0	0	0	0	0	0	0	0	0	14	0	0	14	0	0	0	0	7	7	7	7	0	0	0	0	0	56	7.2471e-14	1.89874e-09	1.81323e-09	1.60774e-12
Glyma.08G266100	12	0	0	0	4	0	0	8	10	8	0	0	12	0	0	0	12	0	0	2	0	8	4	0	10	6	2	0	0	12	86	7.71283e-14	2.02076e-09	1.92967e-09	1.70961e-12
Glyma.08G159000	6	0	0	0	6	0	0	0	6	0	0	0	6	6	6	6	0	0	0	0	6	0	6	6	6	6	6	0	0	6	72	7.83699e-14	2.05329e-09	1.96003e-09	1.72401e-12
Glyma.12G159500	8	0	0	0	4	0	0	14	8	14	0	0	6	0	0	0	8	0	0	0	0	2	2	0	4	8	0	0	0	6	72	7.83699e-14	2.05329e-09	1.96003e-09	1.72401e-12
Glyma.13G193200	6	0	0	0	0	0	0	6	6	6	0	0	6	0	6	0	6	0	0	0	0	6	0	6	12	6	6	0	0	6	72	7.83699e-14	2.05329e-09	1.96003e-09	1.72401e-12
Glyma.14G119100	6	0	0	0	6	0	0	6	6	6	0	0	6	0	0	0	12	0	0	0	0	6	6	0	6	6	6	0	0	6	72	7.83699e-14	2.05329e-09	1.96003e-09	1.72401e-12
Glyma.15G210600	6	0	0	0	6	0	0	9	9	9	0	0	6	0	0	0	6	0	0	0	0	3	3	0	6	6	6	3	0	6	72	7.83699e-14	2.05329e-09	1.96003e-09	1.72401e-12
Glyma.17G192700	8	0	0	0	0	0	0	8	0	8	0	6	0	0	0	0	10	0	0	0	0	8	6	0	8	8	6	2	0	6	72	7.83699e-14	2.05329e-09	1.96003e-09	1.72401e-12
Glyma.03G162100	0	0	0	0	6	0	0	6	6	6	0	6	0	6	0	0	6	6	0	0	0	6	6	0	6	6	6	0	0	6	72	7.83699e-14	2.05329e-09	1.96003e-09	1.72401e-12
Glyma.02G109300	6	0	0	0	0	0	6	6	6	6	0	0	6	0	6	0	6	0	0	0	0	6	6	0	6	6	0	6	0	6	72	7.83699e-14	2.05329e-09	1.96003e-09	1.72401e-12
Glyma.07G037400	3	0	0	0	0	0	0	6	6	6	0	6	0	3	6	0	6	0	0	6	0	6	0	6	6	6	6	0	0	6	72	7.83699e-14	2.05329e-09	1.96003e-09	1.72401e-12
Glyma.09G171400	5	3	3	3	3	0	0	5	6	5	2	3	8	4	4	2	9	3	2	1	3	1	6	4	7	3	3	2	1	13	88	8.47164e-14	2.21957e-09	2.11859e-09	1.86049e-12
Glyma.12G152100	11	0	0	0	3	0	0	15	6	15	0	0	13	0	2	0	11	0	0	1	0	4	1	0	12	4	3	0	0	13	88	8.47164e-14	2.21957e-09	2.11859e-09	1.86049e-12
Glyma.06G252100	7	0	1	0	0	0	0	10	10	10	0	1	8	0	2	1	9	2	1	2	0	2	4	4	9	4	0	1	0	9	79	8.52027e-14	2.23231e-09	2.13058e-09	1.86804e-12
Glyma.18G152600	8	0	0	0	6	0	0	2	9	2	0	0	9	2	3	1	8	0	0	0	0	7	7	0	9	10	5	0	0	9	79	8.52027e-14	2.23231e-09	2.13058e-09	1.86804e-12
Glyma.05G103400	4	2	2	4	3	0	0	6	3	6	2	2	3	2	4	2	5	3	2	2	2	2	4	3	3	3	2	3	2	7	74	9.73532e-14	2.55065e-09	2.43432e-09	2.13265e-12
Glyma.15G234100	5	0	1	0	5	0	0	9	5	9	0	5	5	3	6	0	6	3	0	3	0	4	1	4	6	4	4	3	0	10	81	9.85566e-14	2.58218e-09	2.46431e-09	2.15721e-12
Glyma.18G026900	8	0	3	2	0	0	0	0	1	0	0	2	0	4	0	0	4	2	1	3	2	0	8	0	6	8	5	4	0	2	61	1.0592e-13	2.77511e-09	2.64832e-09	2.31645e-12
Glyma.19G060100	18	0	0	0	0	0	0	0	6	0	0	0	18	0	0	0	18	0	0	2	0	10	6	2	16	16	4	0	0	18	98	1.10408e-13	2.89268e-09	2.76041e-09	2.41257e-12
Glyma.18G139802	14	0	2	0	3	0	0	11	8	11	0	1	10	0	1	0	9	0	0	0	0	2	3	1	10	3	5	0	0	11	83	1.11734e-13	2.92743e-09	2.79335e-09	2.4375e-12
Glyma.03G055100	9	0	4	0	4	0	0	7	6	7	0	3	8	1	2	0	8	0	0	3	0	5	4	1	11	5	5	1	0	11	83	1.11734e-13	2.92743e-09	2.79335e-09	2.4375e-12
Glyma.03G099900	4	0	0	0	6	0	0	4	4	4	0	2	6	6	6	0	6	0	0	2	0	4	4	6	6	6	6	2	0	8	76	1.17645e-13	3.08229e-09	2.93982e-09	2.54315e-12
Glyma.04G041200	4	0	4	0	4	0	0	4	4	4	0	4	4	4	4	4	4	4	0	0	4	4	4	4	4	4	4	4	0	8	76	1.17645e-13	3.08229e-09	2.93982e-09	2.54315e-12
Glyma.04G106100	9	0	3	0	4	0	0	4	6	4	0	3	5	2	3	0	6	0	0	2	0	6	4	5	6	6	3	3	0	8	76	1.17645e-13	3.08229e-09	2.93982e-09	2.54315e-12
Glyma.10G091400	20	0	4	0	0	0	0	0	12	0	0	8	0	0	0	0	0	0	0	0	0	16	0	4	16	0	0	4	0	8	76	1.17645e-13	3.08229e-09	2.93982e-09	2.54315e-12
Glyma.12G110700	4	0	0	0	4	0	0	4	4	4	0	4	4	0	0	0	16	0	0	0	0	16	4	0	4	8	4	4	0	8	76	1.17645e-13	3.08229e-09	2.93982e-09	2.54315e-12
Glyma.13G313901	8	0	2	0	2	0	0	10	10	10	0	0	8	0	2	0	4	0	0	0	0	4	0	6	8	4	4	2	0	8	76	1.17645e-13	3.08229e-09	2.93982e-09	2.54315e-12
Glyma.14G172300	8	0	0	0	0	0	0	8	4	8	0	0	8	0	2	0	10	0	0	0	0	4	2	0	10	10	10	0	0	8	76	1.17645e-13	3.08229e-09	2.93982e-09	2.54315e-12
Glyma.16G025600	8	0	4	0	8	0	0	4	8	4	0	4	4	0	4	0	0	4	0	0	0	8	0	8	8	0	0	8	0	8	76	1.17645e-13	3.08229e-09	2.93982e-09	2.54315e-12
Glyma.18G024300	8	0	8	0	0	0	0	0	8	0	0	8	0	8	0	0	8	0	4	0	0	0	8	0	8	8	8	0	0	8	76	1.17645e-13	3.08229e-09	2.93982e-09	2.54315e-12
Glyma.18G245000	8	0	0	0	0	0	0	8	0	8	0	8	0	0	8	0	8	0	0	0	0	0	8	0	8	8	8	4	0	8	76	1.17645e-13	3.08229e-09	2.93982e-09	2.54315e-12
Glyma.18G251900	6	0	0	0	6	0	0	6	6	6	0	2	6	0	4	0	6	2	0	6	0	6	2	0	8	4	8	0	0	8	76	1.17645e-13	3.08229e-09	2.93982e-09	2.54315e-12
Glyma.19G233900	5	0	0	0	0	0	0	0	5	0	0	0	0	0	0	0	5	5	0	5	0	5	5	5	5	5	5	0	0	0	55	1.2053e-13	3.15788e-09	3.01156e-09	2.59908e-12
Glyma.20G147000	11	0	0	0	0	0	0	0	0	0	0	0	0	0	0	0	11	0	0	0	0	11	0	0	11	0	0	11	0	0	55	1.2053e-13	3.15788e-09	3.01156e-09	2.59908e-12
Glyma.15G219700	0	0	0	0	0	0	0	0	0	0	0	0	0	0	0	0	11	0	0	0	0	11	0	11	0	11	11	0	0	0	55	1.2053e-13	3.15788e-09	3.01156e-09	2.59908e-12
Glyma.18G141500	4	0	0	0	2	0	0	16	4	16	0	0	4	0	2	0	4	0	0	0	0	4	2	2	4	4	2	0	0	4	66	1.25903e-13	3.29865e-09	3.14542e-09	2.70825e-12
Glyma.03G044000	6	0	0	0	4	0	0	6	0	6	0	4	0	4	4	0	4	4	0	0	0	4	4	2	6	4	4	4	0	4	66	1.25903e-13	3.29865e-09	3.14542e-09	2.70825e-12
Glyma.04G122700	10	0	0	0	0	0	0	0	10	0	0	4	0	4	8	0	0	0	0	0	0	10	4	2	10	0	8	0	0	4	66	1.25903e-13	3.29865e-09	3.14542e-09	2.70825e-12
Glyma.17G182166	6	0	0	0	2	0	0	6	6	6	0	1	5	0	2	0	14	0	0	2	0	5	2	3	4	7	4	1	1	6	71	1.28763e-13	3.3736e-09	3.21676e-09	2.76751e-12
Glyma.15G197651	6	0	2	0	5	0	0	5	10	5	0	3	10	3	4	0	9	0	0	3	0	6	3	4	6	7	5	4	0	13	87	1.36185e-13	3.56803e-09	3.40203e-09	2.92462e-12
Glyma.04G086500	3	0	3	0	6	0	0	6	6	6	0	0	9	0	6	0	3	3	0	6	0	6	3	3	6	3	6	3	0	9	78	1.38692e-13	3.63374e-09	3.4637e-09	2.96148e-12
Glyma.04G187700	6	0	0	0	6	0	0	6	6	6	0	3	6	0	6	0	6	0	0	6	0	6	0	6	6	6	3	3	0	9	78	1.38692e-13	3.63374e-09	3.4637e-09	2.96148e-12
Glyma.09G111800	8	0	1	0	5	0	0	7	7	7	0	2	7	0	4	0	8	0	0	1	0	2	5	4	7	7	3	2	0	9	78	1.38692e-13	3.63374e-09	3.4637e-09	2.96148e-12
Glyma.10G252400	9	0	0	0	9	0	0	9	9	9	0	0	9	0	0	0	6	0	0	0	0	0	6	6	6	0	9	0	0	9	78	1.38692e-13	3.63374e-09	3.4637e-09	2.96148e-12
Glyma.17G213700	4	0	3	0	0	0	0	4	0	4	0	5	4	2	0	0	12	1	0	2	0	9	2	0	4	12	11	8	0	9	78	1.38692e-13	3.63374e-09	3.4637e-09	2.96148e-12
Glyma.18G082300	18	0	0	0	0	0	0	15	15	15	3	6	0	0	9	0	0	0	3	0	3	0	0	0	0	0	0	0	0	9	78	1.38692e-13	3.63374e-09	3.4637e-09	2.96148e-12
Glyma.09G085200	0	0	0	0	9	0	0	12	12	12	0	3	6	0	3	0	0	0	0	0	0	9	0	6	15	0	0	0	0	9	78	1.38692e-13	3.63374e-09	3.4637e-09	2.96148e-12
Glyma.14G145600	3	0	0	0	3	0	0	3	3	3	0	0	3	0	3	0	21	0	0	3	0	0	3	6	9	3	0	0	0	3	63	1.51894e-13	3.97961e-09	3.79309e-09	3.23809e-12
Glyma.14G152100	3	0	0	0	3	0	0	3	3	3	0	0	3	0	3	0	18	0	0	12	0	3	0	3	3	3	3	0	0	3	63	1.51894e-13	3.97961e-09	3.79309e-09	3.23809e-12
Glyma.10G035200	10	0	0	0	0	0	0	10	5	10	0	5	5	5	0	0	10	0	0	0	0	10	0	0	5	5	10	0	0	10	80	1.59905e-13	4.18951e-09	3.99219e-09	3.39232e-12
Glyma.13G127500	5	0	0	0	0	0	0	5	5	5	0	5	5	0	5	0	10	0	0	0	5	5	5	5	10	5	5	5	0	10	80	1.59905e-13	4.18951e-09	3.99219e-09	3.39232e-12
Glyma.15G212400	10	0	0	0	8	0	0	10	10	10	0	0	10	0	0	0	10	0	0	0	0	2	0	2	6	6	6	0	0	10	80	1.59905e-13	4.18951e-09	3.99219e-09	3.39232e-12
Glyma.16G102300	5	0	5	0	10	0	0	5	5	5	0	0	10	0	10	0	5	0	0	5	0	5	5	0	5	5	5	0	0	10	80	1.59905e-13	4.18951e-09	3.99219e-09	3.39232e-12
Glyma.02G045000	5	0	5	0	5	0	5	5	5	5	0	5	5	0	5	0	5	0	0	5	0	5	5	5	5	5	5	0	0	10	80	1.59905e-13	4.18951e-09	3.99219e-09	3.39232e-12
Glyma.02G171600	8	0	1	0	4	0	8	8	6	8	0	2	8	0	2	0	6	1	0	0	0	7	3	4	7	6	1	0	0	10	80	1.59905e-13	4.18951e-09	3.99219e-09	3.39232e-12
Glyma.07G064500	5	2	1	1	4	0	0	7	7	7	0	5	0	0	4	0	1	1	0	1	1	0	6	6	7	2	4	1	0	5	68	1.66091e-13	4.35157e-09	4.14645e-09	3.52069e-12
Glyma.01G092900	6	0	0	0	4	4	6	0	6	0	2	0	0	0	4	0	6	0	0	0	0	0	4	0	6	8	6	0	0	2	60	1.75814e-13	4.60633e-09	4.38832e-09	3.71179e-12
Glyma.01G121000	3	0	1	0	3	3	5	5	5	5	0	0	2	1	3	0	5	0	0	1	0	3	1	3	5	3	3	2	0	2	60	1.75814e-13	4.60633e-09	4.38832e-09	3.71179e-12
Glyma.01G132300	7	0	0	0	7	0	0	7	8	7	0	0	2	2	5	0	9	0	1	1	0	0	0	0	4	1	1	0	0	2	60	1.75814e-13	4.60633e-09	4.38832e-09	3.71179e-12
Glyma.06G301500	6	0	6	0	2	0	0	6	6	6	0	0	2	0	2	0	2	2	0	0	6	2	4	2	2	2	2	2	0	2	60	1.75814e-13	4.60633e-09	4.38832e-09	3.71179e-12
Glyma.10G130400	10	0	0	0	2	0	0	2	2	2	0	0	2	0	2	0	2	2	0	2	0	12	2	4	2	12	2	0	0	2	60	1.75814e-13	4.60633e-09	4.38832e-09	3.71179e-12
Glyma.04G140600	5	0	1	0	1	0	0	6	10	6	0	4	4	3	5	0	11	0	0	0	0	2	5	4	9	5	2	0	0	8	75	1.92066e-13	5.03213e-09	4.79378e-09	4.05164e-12
Glyma.07G209400	4	0	0	0	8	0	0	8	8	8	0	8	4	0	4	0	8	0	0	0	0	8	4	4	8	8	4	0	0	12	84	2.0049e-13	5.25283e-09	4.99961e-09	4.15572e-12
Glyma.09G182600	12	0	0	0	0	0	0	0	0	0	0	0	0	0	0	0	0	0	0	0	0	0	6	0	12	12	12	0	0	0	54	2.0049e-13	5.25283e-09	4.99961e-09	4.15572e-12
Glyma.10G221300	6	0	0	0	0	0	0	0	6	0	0	0	0	0	0	0	6	3	0	0	0	6	6	6	6	6	3	0	0	0	54	2.0049e-13	5.25283e-09	4.99961e-09	4.15572e-12
Glyma.12G171100	6	0	0	0	6	0	0	6	12	6	0	6	6	0	6	0	12	0	0	6	0	6	0	0	6	6	6	0	0	12	84	2.0049e-13	5.25283e-09	4.99961e-09	4.15572e-12
Glyma.13G027800	6	0	0	0	0	0	0	0	12	0	0	0	0	0	0	0	4	0	0	0	0	4	2	0	8	10	8	0	0	0	54	2.0049e-13	5.25283e-09	4.99961e-09	4.15572e-12
Glyma.13G224300	9	0	0	0	0	0	0	0	0	0	0	0	0	0	0	0	9	0	0	0	0	0	9	0	9	9	0	9	0	0	54	2.0049e-13	5.25283e-09	4.99961e-09	4.15572e-12
Glyma.14G189200	6	0	0	0	6	0	0	6	6	6	0	6	6	0	6	0	6	0	0	6	0	6	6	0	6	6	6	6	0	12	84	2.0049e-13	5.25283e-09	4.99961e-09	4.15572e-12
Glyma.16G183400	8	0	0	0	2	0	0	2	0	2	0	0	0	0	0	0	12	0	0	0	0	0	2	0	2	10	8	6	0	0	54	2.0049e-13	5.25283e-09	4.99961e-09	4.15572e-12
Glyma.20G054500	12	0	0	0	8	0	0	12	12	12	0	0	12	0	0	0	8	0	0	0	0	4	4	0	4	8	0	0	0	12	84	2.0049e-13	5.25283e-09	4.99961e-09	4.15572e-12
Glyma.20G139000	8	0	0	0	6	0	0	6	6	6	0	4	8	0	6	0	6	4	0	2	0	6	2	6	6	6	6	2	0	12	84	2.0049e-13	5.25283e-09	4.99961e-09	4.15572e-12
Glyma.06G232100	0	0	0	0	12	0	0	0	18	0	0	0	0	0	0	0	3	0	0	0	0	3	0	0	18	0	0	0	0	0	54	2.0049e-13	5.25283e-09	4.99961e-09	4.15572e-12
Glyma.08G122000	0	0	0	0	2	0	0	8	0	8	0	0	0	0	0	2	8	2	0	0	0	0	0	0	8	8	8	0	0	0	54	2.0049e-13	5.25283e-09	4.99961e-09	4.15572e-12
Glyma.11G194200	0	0	0	0	9	0	0	9	0	9	0	0	0	0	0	0	9	0	0	0	0	9	0	9	0	0	0	0	0	0	54	2.0049e-13	5.25283e-09	4.99961e-09	4.15572e-12
Glyma.17G214900	0	0	0	0	12	0	0	0	12	0	0	0	12	0	12	0	0	0	0	0	6	0	0	0	0	18	12	12	0	12	84	2.0049e-13	5.25283e-09	4.99961e-09	4.15572e-12
Glyma.13G037100	0	0	0	0	0	0	0	21	6	21	0	0	0	0	0	0	0	0	0	0	0	0	0	0	0	6	0	0	0	0	54	2.0049e-13	5.25283e-09	4.99961e-09	4.15572e-12
Glyma.15G263700	0	0	0	0	0	0	0	6	0	6	0	6	6	6	6	0	12	12	0	0	0	0	6	0	6	12	12	0	0	12	84	2.0049e-13	5.25283e-09	4.99961e-09	4.15572e-12
Glyma.20G132100	0	0	0	0	0	0	0	0	12	0	0	0	0	0	0	0	0	0	0	0	0	12	0	6	0	12	0	12	0	0	54	2.0049e-13	5.25283e-09	4.99961e-09	4.15572e-12
Glyma.16G141500	0	0	0	0	0	0	0	0	0	0	0	0	0	0	0	0	9	6	0	0	0	0	6	0	9	9	9	6	0	0	54	2.0049e-13	5.25283e-09	4.99961e-09	4.15572e-12
Glyma.05G071200	9	0	0	0	3	0	0	6	6	6	0	3	9	0	3	0	6	3	0	3	0	9	6	3	6	6	6	3	0	12	84	2.0049e-13	5.25283e-09	4.99961e-09	4.15572e-12
Glyma.05G201800	6	0	0	0	6	0	0	0	0	0	0	0	0	0	0	0	6	0	0	0	0	6	6	6	6	6	6	0	0	0	54	2.0049e-13	5.25283e-09	4.99961e-09	4.15572e-12
Glyma.06G248400	4	0	4	0	12	0	0	12	12	12	0	0	12	0	0	0	4	8	0	8	0	0	0	0	8	0	0	0	0	12	84	2.0049e-13	5.25283e-09	4.99961e-09	4.15572e-12
Glyma.06G271700	16	0	4	0	16	0	0	0	0	0	0	0	12	0	0	0	12	4	4	12	0	0	0	0	4	0	12	0	0	12	84	2.0049e-13	5.25283e-09	4.99961e-09	4.15572e-12
Glyma.12G134000	6	0	0	0	6	0	0	6	6	6	0	0	6	0	6	0	8	0	0	0	0	4	4	0	6	6	6	0	0	6	70	2.11524e-13	5.54192e-09	5.27413e-09	4.37405e-12
Glyma.15G170400	6	0	0	0	0	0	0	0	6	0	0	0	6	4	6	0	0	0	0	0	0	6	4	0	16	14	8	0	0	6	70	2.11524e-13	5.54192e-09	5.27413e-09	4.37405e-12
Glyma.17G171600	4	0	0	0	2	0	0	10	2	10	0	0	6	2	2	0	16	0	0	0	0	2	2	0	4	10	4	0	0	6	70	2.11524e-13	5.54192e-09	5.27413e-09	4.37405e-12
Glyma.03G070100	8	0	0	0	5	0	0	9	7	9	0	2	11	0	4	0	9	1	0	2	0	4	3	0	9	9	7	0	0	13	86	2.188e-13	5.73257e-09	5.45535e-09	4.52095e-12
Glyma.03G087500	20	0	0	0	20	0	0	0	0	0	0	8	20	0	0	0	16	0	0	0	0	0	4	0	20	20	16	0	0	28	116	2.24498e-13	5.88184e-09	5.59717e-09	4.63502e-12
Glyma.04G137900	4	0	0	0	2	0	0	5	10	5	0	2	7	0	6	0	17	0	0	0	0	4	5	1	12	4	2	0	0	9	77	2.25682e-13	5.91286e-09	5.62647e-09	4.6558e-12
Glyma.01G112600	9	0	0	0	1	4	4	7	7	7	0	0	3	0	0	0	5	0	0	0	0	4	1	0	6	6	1	0	0	3	62	2.51601e-13	6.59196e-09	6.27217e-09	5.18236e-12
Glyma.03G055500	5	0	1	0	5	0	0	5	5	5	0	0	3	1	5	0	5	0	0	2	0	4	5	0	5	5	4	0	0	3	62	2.51601e-13	6.59196e-09	6.27217e-09	5.18236e-12
Glyma.06G315500	8	0	0	0	0	0	0	8	0	8	0	8	8	0	8	0	8	0	0	0	4	8	8	8	8	8	8	0	0	16	92	2.61042e-13	6.8393e-09	6.50699e-09	5.36837e-12
Glyma.14G124550	12	0	0	0	4	0	0	12	16	12	0	4	12	0	0	0	20	0	0	0	0	4	0	4	4	4	0	0	0	16	92	2.61042e-13	6.8393e-09	6.50699e-09	5.36837e-12
Glyma.15G211100	0	0	0	0	12	0	0	0	16	0	0	4	20	0	4	0	16	0	0	0	0	16	0	8	0	20	16	0	0	24	108	2.64646e-13	6.93372e-09	6.59656e-09	5.43821e-12
Glyma.02G183000	2	0	0	0	1	0	0	8	9	8	0	4	1	0	0	0	1	0	0	0	0	7	8	6	2	8	7	0	0	5	67	2.7364e-13	7.16937e-09	6.82048e-09	5.61863e-12
Glyma.08G262900	20	0	0	0	4	0	0	8	8	8	0	4	16	0	0	0	24	0	0	0	0	0	0	0	16	12	0	0	0	20	100	2.81489e-13	7.37502e-09	7.01556e-09	5.77075e-12
Glyma.09G161200	0	0	0	0	0	0	0	20	0	20	0	0	20	5	15	0	25	0	0	0	0	0	0	0	15	0	0	0	0	20	100	2.81489e-13	7.37502e-09	7.01556e-09	5.77075e-12
Glyma.06G277400	3	0	0	0	2	0	0	5	5	5	0	2	0	1	5	0	3	1	0	3	0	5	6	3	6	4	2	0	0	2	59	2.91855e-13	7.6466e-09	7.27361e-09	5.97858e-12
Glyma.08G032700	6	0	2	0	6	0	0	6	6	6	0	2	6	0	4	0	6	0	2	0	0	6	2	6	6	6	4	0	0	8	74	3.1347e-13	8.21291e-09	7.81072e-09	6.39635e-12
Glyma.15G171000	6	0	4	0	8	0	0	2	6	2	0	2	6	0	2	0	2	0	0	0	0	6	4	2	6	12	12	0	0	8	74	3.1347e-13	8.21291e-09	7.81072e-09	6.39635e-12
Glyma.18G139700	10	0	0	0	4	0	0	8	6	8	0	0	8	0	4	0	8	0	0	0	0	4	4	2	6	6	4	0	0	8	74	3.1347e-13	8.21291e-09	7.81072e-09	6.39635e-12
Glyma.06G091600	4	0	0	0	6	0	0	6	6	6	0	2	6	4	6	0	6	0	0	4	0	4	0	0	6	8	8	0	0	8	74	3.1347e-13	8.21291e-09	7.81073e-09	6.39635e-12
Glyma.06G182800	6	0	2	0	6	0	0	6	8	6	0	2	6	0	2	0	6	0	0	2	0	8	4	2	6	6	4	0	0	8	74	3.1347e-13	8.21291e-09	7.81073e-09	6.39635e-12
Glyma.07G065200	6	0	0	0	0	0	0	13	7	13	0	0	1	0	1	0	1	0	0	0	0	0	1	0	8	3	2	1	0	1	56	3.21842e-13	8.43227e-09	8.01902e-09	6.56207e-12
Glyma.04G161600	7	0	0	0	0	0	0	0	6	0	0	0	0	0	4	0	8	1	0	0	0	5	4	3	6	6	2	1	0	0	53	3.33548e-13	8.73897e-09	8.31036e-09	6.79546e-12
Glyma.09G188600	4	0	4	0	4	0	0	4	4	4	0	0	4	0	4	0	4	0	4	0	0	8	4	4	4	4	4	0	0	4	64	3.43689e-13	9.00464e-09	8.55853e-09	6.93198e-12
Glyma.09G248000	4	0	4	0	4	0	0	4	4	4	0	4	0	4	0	4	4	0	4	4	0	0	4	4	4	4	4	0	0	4	64	3.43689e-13	9.00464e-09	8.55853e-09	6.93198e-12
Glyma.10G159700	4	0	4	0	4	0	0	4	4	4	0	4	0	4	0	0	4	0	0	4	0	4	4	4	4	4	4	4	0	4	64	3.43689e-13	9.00464e-09	8.55853e-09	6.93198e-12
Glyma.11G161500	4	0	0	0	4	0	0	4	4	4	0	4	0	0	4	4	4	0	0	4	0	4	4	4	4	4	4	4	0	4	64	3.43689e-13	9.00464e-09	8.55853e-09	6.93198e-12
Glyma.15G232600	2	0	0	0	6	0	0	8	4	8	0	0	4	0	6	0	4	0	0	2	0	16	0	2	4	2	0	0	0	4	64	3.43689e-13	9.00464e-09	8.55853e-09	6.93198e-12
Glyma.17G132800	4	0	4	0	4	0	0	4	4	4	0	0	4	0	4	0	4	4	0	4	0	4	0	4	4	4	4	4	0	4	64	3.43689e-13	9.00464e-09	8.55853e-09	6.93198e-12
Glyma.17G211100	8	0	0	0	4	0	0	8	4	8	0	0	4	0	4	0	4	4	0	0	0	4	0	4	4	4	4	0	0	4	64	3.43689e-13	9.00464e-09	8.55853e-09	6.93198e-12
Glyma.18G078000	4	0	0	0	4	0	0	4	4	4	0	0	4	0	8	0	4	4	0	0	0	4	0	4	8	4	4	4	0	4	64	3.43689e-13	9.00464e-09	8.55853e-09	6.93198e-12
Glyma.19G159800	4	0	0	0	4	0	0	4	4	4	0	0	4	0	4	0	4	4	0	4	0	4	4	4	4	4	4	4	0	4	64	3.43689e-13	9.00464e-09	8.55853e-09	6.93198e-12
Glyma.03G056900	9	0	0	0	4	0	0	5	7	5	0	0	4	0	2	0	7	0	0	0	0	5	3	0	7	5	5	0	0	4	64	3.43688e-13	9.00464e-09	8.55853e-09	6.93198e-12
Glyma.06G103100	4	0	2	0	4	0	0	4	4	4	0	0	4	4	4	0	6	2	0	4	0	4	2	2	6	4	4	0	0	4	64	3.43688e-13	9.00464e-09	8.55853e-09	6.93198e-12
Glyma.07G054300	4	0	4	0	4	0	0	4	4	4	0	0	4	0	4	0	4	4	0	4	0	4	4	4	4	4	4	0	0	4	64	3.43688e-13	9.00464e-09	8.55853e-09	6.93198e-12
Glyma.07G117500	8	0	0	0	4	0	0	4	4	4	0	0	4	0	0	0	4	0	0	4	0	4	8	4	8	4	4	0	0	4	64	3.43688e-13	9.00464e-09	8.55853e-09	6.93198e-12
Glyma.01G094300	6	0	0	0	3	4	6	5	6	5	0	1	5	0	4	0	6	1	0	0	0	2	3	1	9	5	2	1	0	6	69	3.47414e-13	9.10225e-09	8.64922e-09	6.9749e-12
Glyma.01G122700	9	0	0	0	3	0	4	7	10	7	0	0	6	0	2	0	5	0	0	0	0	2	4	2	8	4	2	0	0	6	69	3.47414e-13	9.10225e-09	8.64922e-09	6.9749e-12
Glyma.15G172800	6	0	0	0	3	0	0	0	6	0	0	0	6	3	6	0	0	3	0	6	0	6	6	0	6	6	6	6	0	6	69	3.47414e-13	9.10225e-09	8.64922e-09	6.9749e-12
Glyma.15G209200	4	0	0	1	5	0	0	6	12	6	0	0	6	0	2	0	10	1	0	0	0	4	0	0	6	7	2	3	0	6	69	3.47414e-13	9.10225e-09	8.64922e-09	6.9749e-12
Glyma.18G012700	9	0	0	0	9	0	0	9	0	9	0	6	0	3	0	0	3	0	0	3	0	0	0	9	0	3	12	0	0	6	69	3.47414e-13	9.10225e-09	8.64922e-09	6.9749e-12
Glyma.19G160800	3	0	0	0	3	0	0	6	3	6	0	3	3	6	3	0	6	3	0	0	0	6	3	3	6	6	3	3	0	6	69	3.47414e-13	9.10225e-09	8.64922e-09	6.9749e-12
Glyma.17G186000	2	2	2	2	3	0	0	5	5	5	2	2	5	3	3	2	5	3	2	3	2	2	4	7	5	3	2	2	2	9	76	3.67096e-13	9.61791e-09	9.13885e-09	7.3644e-12
Glyma.12G158000	7	0	0	0	5	0	0	11	12	11	0	0	15	0	3	0	14	0	0	0	0	4	4	0	10	6	2	0	0	15	89	3.97831e-13	1.04232e-08	9.90321e-09	7.96879e-12
Glyma.04G105400	17	0	1	0	2	0	0	6	7	6	0	1	14	1	2	0	13	0	0	1	0	3	2	2	11	13	2	0	0	15	89	3.97831e-13	1.04232e-08	9.90321e-09	7.96879e-12
Glyma.02G099500	6	0	4	0	2	0	10	6	4	6	0	4	6	2	4	0	12	0	0	4	0	4	2	4	4	2	2	0	0	10	78	4.20405e-13	1.10146e-08	1.0463e-08	8.38888e-12
Glyma.09G100500	5	1	2	1	5	0	0	6	4	6	0	2	8	2	2	0	6	3	0	3	1	4	4	2	6	5	5	4	1	10	78	4.20405e-13	1.10146e-08	1.0463e-08	8.38888e-12
Glyma.09G117100	12	0	0	0	4	0	0	8	4	8	0	0	10	0	2	0	14	0	0	2	0	2	4	0	12	4	2	0	0	10	78	4.20405e-13	1.10146e-08	1.0463e-08	8.38888e-12
Glyma.10G129166	6	1	2	3	3	0	0	5	5	5	1	3	6	2	1	2	7	1	1	1	2	3	5	2	7	6	5	2	1	10	78	4.20405e-13	1.10146e-08	1.0463e-08	8.38888e-12
Glyma.14G158900	6	0	0	0	6	0	0	6	8	6	0	4	6	0	4	0	8	0	0	2	0	6	4	2	6	8	6	0	0	10	78	4.20405e-13	1.10146e-08	1.0463e-08	8.38888e-12
Glyma.15G204300	7	0	1	0	8	0	0	8	11	8	0	1	16	0	3	0	17	0	0	0	0	3	3	1	4	14	5	0	0	17	93	4.28261e-13	1.12205e-08	1.06581e-08	8.53915e-12
Glyma.04G138900	4	0	0	0	2	0	0	3	16	3	0	0	5	0	3	0	15	0	0	0	0	1	4	2	10	3	0	0	0	5	66	4.5078e-13	1.18104e-08	1.12168e-08	8.96088e-12
Glyma.04G142400	4	0	0	0	2	0	0	3	10	3	0	1	4	3	2	0	13	0	0	0	0	3	4	2	11	3	1	2	0	5	66	4.5078e-13	1.18104e-08	1.12168e-08	8.96088e-12
Glyma.09G098300	4	0	0	0	7	0	0	9	4	9	0	1	4	1	3	0	5	0	0	1	0	5	2	0	9	6	1	0	0	5	66	4.5078e-13	1.18104e-08	1.12168e-08	8.96088e-12
Glyma.10G079700	7	0	1	0	8	0	0	2	2	2	0	3	2	0	2	0	7	0	0	1	0	7	5	4	7	6	5	0	0	5	66	4.5078e-13	1.18104e-08	1.12168e-08	8.96088e-12
Glyma.01G127800	2	0	4	0	1	0	4	7	7	7	0	1	1	2	2	0	8	0	0	0	0	1	1	2	2	4	4	0	0	2	58	4.8453e-13	1.26947e-08	1.20541e-08	9.59537e-12
Glyma.04G141900	2	0	0	0	2	0	0	2	12	2	0	0	2	0	2	0	10	2	0	0	0	4	6	0	10	4	0	0	0	2	58	4.8453e-13	1.26947e-08	1.20541e-08	9.59537e-12
Glyma.10G239000	4	0	1	0	4	0	0	4	4	4	0	0	2	0	2	0	5	2	0	5	1	5	3	1	4	4	4	1	0	2	58	4.8453e-13	1.26947e-08	1.20541e-08	9.59537e-12
Glyma.14G157600	2	0	0	0	0	0	0	2	14	2	0	2	0	8	10	0	10	0	0	0	0	0	0	6	2	2	0	0	0	2	58	4.8453e-13	1.26947e-08	1.20541e-08	9.59537e-12
Glyma.18G127700	12	0	0	0	2	0	0	10	2	10	0	0	2	2	2	0	2	0	0	0	0	2	4	2	4	2	2	0	0	2	58	4.8453e-13	1.26947e-08	1.20541e-08	9.59537e-12
Glyma.14G128200	10	0	0	0	2	0	0	9	13	9	0	0	12	0	3	0	11	0	0	2	0	5	3	1	9	2	2	1	0	12	82	5.20072e-13	1.36259e-08	1.29363e-08	1.02682e-11
Glyma.18G167866	10	0	2	0	4	0	0	2	4	2	2	0	10	2	0	0	10	2	0	2	2	8	4	2	4	6	6	8	2	12	82	5.20072e-13	1.36259e-08	1.29363e-08	1.02682e-11
Glyma.18G207400	14	0	0	0	10	0	0	6	6	6	0	2	10	2	2	0	2	0	0	0	0	6	0	2	12	8	6	0	0	12	82	5.20072e-13	1.36259e-08	1.29363e-08	1.02682e-11
Glyma.04G149200	8	0	0	0	4	0	0	8	10	8	0	3	9	0	4	0	8	0	0	0	0	3	6	3	13	4	3	0	0	12	82	5.20072e-13	1.36259e-08	1.29363e-08	1.02682e-11
Glyma.02G186300	6	0	0	0	4	0	6	6	6	6	0	0	1	0	0	0	1	0	0	0	0	5	0	0	5	6	4	0	0	1	55	5.3518e-13	1.40217e-08	1.33115e-08	1.05585e-11
Glyma.13G069600	4	0	0	0	0	0	0	2	4	2	0	0	0	0	2	0	4	0	0	2	0	6	4	2	4	4	4	8	0	0	52	5.55006e-13	1.45412e-08	1.38024e-08	1.09168e-11
Glyma.20G076500	4	0	0	0	8	0	0	0	8	0	0	0	0	0	0	0	0	0	0	0	0	8	4	8	4	4	4	0	0	0	52	5.55006e-13	1.45412e-08	1.38024e-08	1.09168e-11
Glyma.11G085900	0	0	0	0	0	0	0	0	0	0	0	0	0	0	0	0	0	0	0	0	0	13	13	13	13	0	0	0	0	0	52	5.55006e-13	1.45412e-08	1.38024e-08	1.09168e-11
Glyma.06G135300	8	0	0	0	8	0	0	4	4	4	0	0	0	0	8	4	4	0	0	0	0	4	4	0	0	0	0	0	0	0	52	5.55006e-13	1.45412e-08	1.38025e-08	1.09168e-11
Glyma.01G098700	6	0	0	0	5	6	6	3	6	3	0	2	4	0	3	0	6	0	0	0	0	4	3	1	6	6	3	1	0	6	68	5.70497e-13	1.4947e-08	1.41871e-08	1.12131e-11
Glyma.04G084200	6	0	3	0	6	0	0	6	6	6	0	3	6	0	3	0	6	3	0	0	0	6	3	3	6	6	3	3	0	9	75	5.96891e-13	1.56386e-08	1.48399e-08	1.16793e-11
Glyma.07G038300	9	0	0	0	0	0	0	6	9	6	0	9	0	3	9	0	3	3	0	9	0	3	0	6	3	3	3	0	0	9	75	5.96891e-13	1.56386e-08	1.48399e-08	1.16793e-11
Glyma.07G044300	6	0	0	0	6	0	0	3	6	3	0	3	6	0	6	0	6	3	3	6	0	6	6	3	6	6	0	0	0	9	75	5.96891e-13	1.56386e-08	1.48399e-08	1.16793e-11
Glyma.08G304100	15	0	0	0	0	0	0	0	0	0	0	9	0	0	12	0	12	6	0	0	0	0	0	0	0	15	15	0	0	9	75	5.96891e-13	1.56386e-08	1.48399e-08	1.16793e-11
Glyma.15G203900	4	0	0	0	3	0	0	4	8	4	0	0	9	1	4	0	9	0	0	0	0	5	3	1	8	14	6	1	0	9	75	5.96891e-13	1.56386e-08	1.48399e-08	1.16793e-11
Glyma.17G178800	6	0	0	0	3	0	0	6	3	6	0	3	6	0	0	0	9	0	0	0	0	12	6	3	3	6	6	6	0	9	75	5.96891e-13	1.56386e-08	1.48399e-08	1.16793e-11
Glyma.18G155300	8	0	0	0	1	0	0	15	10	15	2	2	10	0	2	0	9	3	0	3	0	2	4	0	8	4	1	1	0	14	86	6.02126e-13	1.57757e-08	1.49694e-08	1.17729e-11
Glyma.10G270100	2	0	2	0	8	0	0	8	8	8	0	8	8	2	2	0	2	0	2	2	0	8	2	8	8	2	8	8	0	16	90	6.5981e-13	1.7287e-08	1.64029e-08	1.28911e-11
Glyma.18G197800	8	0	4	0	8	0	0	8	10	8	0	4	18	4	8	0	18	2	0	0	0	6	2	0	10	2	2	2	0	22	102	6.75959e-13	1.77101e-08	1.68037e-08	1.31968e-11
Glyma.18G068650	5	2	3	3	3	0	1	4	6	4	2	4	4	4	4	1	4	2	2	3	3	2	4	3	4	3	3	2	2	10	77	6.81213e-13	1.78478e-08	1.69336e-08	1.32895e-11
Glyma.08G260800	14	0	0	0	0	0	0	12	14	12	0	0	18	0	0	0	12	0	0	0	0	0	2	0	16	12	0	0	0	18	94	6.9039e-13	1.80882e-08	1.71569e-08	1.33987e-11
Glyma.14G094000	6	0	0	0	0	0	0	3	3	3	0	0	3	0	3	0	3	0	0	0	0	3	3	6	9	9	3	6	0	3	60	6.9039e-13	1.80882e-08	1.71569e-08	1.33987e-11
Glyma.19G086600	3	0	0	0	0	0	0	3	18	3	0	0	3	0	3	0	12	0	0	3	0	3	3	0	3	3	0	3	0	3	60	6.9039e-13	1.80882e-08	1.71569e-08	1.33987e-11
Glyma.20G049400	3	0	0	0	6	0	0	3	6	3	0	0	3	0	0	0	3	0	0	0	0	6	3	3	18	3	3	0	0	3	60	6.9039e-13	1.80882e-08	1.71569e-08	1.33987e-11
Glyma.20G077300	6	0	0	0	6	0	0	0	6	0	0	3	0	0	0	0	6	0	0	6	0	6	6	6	6	6	0	0	0	3	60	6.9039e-13	1.80882e-08	1.71569e-08	1.33987e-11
Glyma.03G020100	3	0	3	0	3	0	0	3	3	3	0	0	3	3	0	0	3	0	0	3	0	3	3	3	6	6	6	6	0	3	60	6.9039e-13	1.80882e-08	1.71569e-08	1.33987e-11
Glyma.07G136100	6	0	3	0	0	0	0	0	0	0	0	3	0	0	9	0	9	0	0	9	0	0	9	6	9	0	0	0	0	3	60	6.9039e-13	1.80882e-08	1.71569e-08	1.33987e-11
Glyma.03G130700	6	0	0	0	5	0	0	4	4	4	1	3	1	3	1	1	4	3	1	1	0	4	4	3	5	4	4	4	0	5	65	7.425e-13	1.94535e-08	1.84459e-08	1.43251e-11
Glyma.05G214300	5	0	5	0	0	0	0	5	5	5	0	0	5	0	5	0	0	0	0	0	5	0	5	5	5	5	5	5	0	5	65	7.425e-13	1.94535e-08	1.84459e-08	1.43251e-11
Glyma.07G130300	5	0	0	0	5	0	0	5	5	5	0	0	5	0	5	0	5	0	0	5	0	5	5	0	5	5	5	0	0	5	65	7.425e-13	1.94535e-08	1.84459e-08	1.43251e-11
Glyma.11G163828	5	0	0	0	5	0	0	5	5	5	0	0	5	0	5	0	5	0	0	5	0	5	5	0	5	5	5	0	0	5	65	7.425e-13	1.94535e-08	1.84459e-08	1.43251e-11
Glyma.17G138300	5	0	0	0	5	0	0	5	5	5	0	0	5	0	0	0	5	0	0	5	0	5	5	5	5	5	0	5	0	5	65	7.425e-13	1.94535e-08	1.84459e-08	1.43251e-11
Glyma.18G203900	15	0	0	0	0	0	0	0	0	0	0	5	0	0	0	0	15	0	0	0	0	0	15	5	10	0	0	5	0	5	65	7.425e-13	1.94535e-08	1.84459e-08	1.43251e-11
Glyma.20G156500	5	0	0	0	10	0	0	5	0	5	0	0	5	0	0	0	5	0	0	0	0	5	5	0	5	10	10	0	0	5	65	7.425e-13	1.94535e-08	1.84459e-08	1.43251e-11
Glyma.04G056600	0	0	0	0	5	0	0	5	5	5	0	0	5	0	5	0	5	5	0	0	0	5	5	5	5	5	5	0	0	5	65	7.425e-13	1.94535e-08	1.84459e-08	1.43251e-11
Glyma.02G161500	8	0	0	0	3	0	3	12	10	12	0	0	11	0	0	0	10	0	0	0	0	2	3	0	7	6	3	0	0	11	79	7.61962e-13	1.99634e-08	1.89287e-08	1.46898e-11
Glyma.03G011702	6	0	0	0	4	0	0	6	6	6	0	2	6	0	6	0	8	2	0	0	0	6	6	4	6	4	2	0	0	8	72	8.34186e-13	2.18557e-08	2.07128e-08	1.59414e-11
Glyma.03G104400	4	2	0	0	6	0	0	6	6	6	0	2	6	0	6	0	6	0	0	0	0	6	4	2	6	6	4	2	0	8	72	8.34186e-13	2.18557e-08	2.07128e-08	1.59414e-11
Glyma.09G161400	8	0	0	0	8	0	0	8	8	8	0	0	8	0	4	0	0	0	0	0	0	8	4	8	8	0	0	0	0	8	72	8.34186e-13	2.18557e-08	2.07129e-08	1.59414e-11
Glyma.14G159600	7	0	1	0	6	0	0	4	7	4	0	0	8	0	4	0	11	0	0	5	0	4	5	0	6	5	3	0	0	8	72	8.34186e-13	2.18557e-08	2.07129e-08	1.59414e-11
Glyma.17G236600	4	0	4	0	4	0	0	4	4	4	4	0	4	0	4	4	4	4	0	4	4	4	4	4	4	4	0	4	0	8	72	8.34186e-13	2.18557e-08	2.07129e-08	1.59414e-11
Glyma.19G055800	6	0	0	0	2	0	0	16	8	16	0	0	8	0	0	0	8	0	0	0	0	2	2	2	8	2	0	0	0	8	72	8.34186e-13	2.18557e-08	2.07129e-08	1.59414e-11
Glyma.19G170900	8	0	0	0	8	0	0	8	8	8	0	8	0	0	0	0	8	0	0	0	0	0	8	8	8	0	0	0	0	8	72	8.34186e-13	2.18557e-08	2.07129e-08	1.59414e-11
Glyma.20G175200	8	0	0	0	0	0	0	8	8	8	0	0	8	0	8	0	8	0	0	0	0	4	0	0	8	8	4	0	0	8	72	8.34186e-13	2.18557e-08	2.07129e-08	1.59414e-11
Glyma.20G179600	8	0	0	0	4	0	0	4	4	4	0	0	8	4	0	0	8	0	0	8	0	4	4	0	4	8	4	4	0	8	72	8.34186e-13	2.18557e-08	2.07129e-08	1.59414e-11
Glyma.20G188300	4	0	0	0	4	0	0	4	4	4	0	4	4	4	4	0	8	0	0	8	4	4	4	4	4	4	4	0	0	8	72	8.34186e-13	2.18557e-08	2.07129e-08	1.59414e-11
Glyma.07G103000	0	0	0	0	0	0	0	8	0	8	0	0	8	0	8	0	8	4	0	0	0	8	0	4	0	8	8	8	0	8	72	8.34186e-13	2.18557e-08	2.07129e-08	1.59414e-11
Glyma.08G170000	0	0	0	0	0	0	0	16	0	16	0	0	8	0	0	0	8	0	0	0	0	16	0	0	16	0	0	0	0	8	72	8.34186e-13	2.18557e-08	2.07129e-08	1.59414e-11
Glyma.19G070100	11	1	2	0	0	0	0	0	9	0	0	1	11	0	7	0	10	0	0	1	0	9	6	1	11	9	4	0	0	12	81	8.36932e-13	2.19276e-08	2.07802e-08	1.59822e-11
Glyma.12G188800	1	0	1	0	1	0	0	5	5	5	0	0	1	0	1	0	5	0	0	3	1	0	4	4	6	5	4	3	0	1	54	8.90064e-13	2.33197e-08	2.20985e-08	1.69845e-11
Glyma.01G112400	4	0	0	0	3	3	3	3	3	3	0	0	0	0	2	0	4	0	0	2	0	3	3	3	5	3	3	1	0	0	51	9.2366e-13	2.41999e-08	2.29243e-08	1.75108e-11
Glyma.02G185300	3	0	0	0	3	0	3	6	6	6	0	0	0	6	0	0	0	0	0	0	0	0	0	3	3	6	6	0	0	0	51	9.2366e-13	2.41999e-08	2.29243e-08	1.75108e-11
Glyma.06G016900	6	0	3	0	6	0	0	0	0	0	0	0	0	0	0	0	0	0	0	0	0	6	6	6	3	6	6	3	0	0	51	9.2366e-13	2.41999e-08	2.29243e-08	1.75108e-11
Glyma.06G017700	6	0	3	0	6	0	0	6	0	6	0	0	0	0	0	0	3	0	0	0	0	6	0	3	3	3	3	3	0	0	51	9.2366e-13	2.41999e-08	2.29243e-08	1.75108e-11
Glyma.19G203700	6	0	3	0	0	0	0	0	0	0	0	0	0	0	0	0	6	0	0	6	0	3	3	0	6	6	3	9	0	0	51	9.2366e-13	2.41999e-08	2.29243e-08	1.75108e-11
Glyma.06G283200	0	0	0	6	0	0	0	6	3	6	0	0	0	0	6	0	6	3	0	0	0	3	6	3	3	0	0	0	0	0	51	9.2366e-13	2.41999e-08	2.29243e-08	1.75108e-11
Glyma.02G169600	0	0	0	0	6	0	9	9	0	9	0	0	0	3	0	0	0	0	0	0	0	0	0	0	0	9	6	0	0	0	51	9.2366e-13	2.41999e-08	2.29243e-08	1.75108e-11
Glyma.10G270800	0	0	0	0	0	0	0	17	0	17	0	0	0	0	0	0	0	0	0	0	0	0	0	0	0	0	0	17	0	0	51	9.2366e-13	2.41999e-08	2.29243e-08	1.75108e-11
Glyma.06G017800	0	0	0	0	0	0	0	0	0	0	0	0	0	0	0	0	0	0	0	0	0	0	0	12	12	12	12	3	0	0	51	9.2366e-13	2.41999e-08	2.29243e-08	1.75108e-11
Glyma.17G186351	2	2	2	6	2	0	0	3	2	3	2	2	2	2	3	2	4	3	2	2	2	2	5	5	2	4	3	2	2	6	67	9.36642e-13	2.454e-08	2.32456e-08	1.77441e-11
Glyma.01G244900	6	0	0	2	2	0	6	6	2	6	0	2	2	0	0	0	6	0	0	0	2	0	6	0	6	6	6	0	0	4	62	9.3803e-13	2.45764e-08	2.32781e-08	1.77447e-11
Glyma.16G087200	4	0	0	0	4	0	0	0	42	0	0	0	4	0	0	0	4	0	0	0	0	0	0	0	4	4	0	0	0	4	62	9.3803e-13	2.45764e-08	2.32781e-08	1.77447e-11
Glyma.08G264002	9	0	0	0	0	0	0	9	6	9	0	9	6	0	3	0	15	0	0	3	0	6	6	0	9	6	6	0	0	15	87	1.01055e-12	2.64764e-08	2.50768e-08	1.91028e-11
Glyma.13G267700	9	0	3	0	9	0	0	9	0	9	0	9	9	0	0	0	9	3	0	9	0	9	9	0	9	3	0	3	0	18	93	1.08962e-12	2.85479e-08	2.70377e-08	2.05825e-11
Glyma.01G078600	8	0	0	0	6	4	8	4	8	4	0	2	8	0	2	0	8	2	0	0	0	0	4	2	6	8	2	0	0	10	76	1.10331e-12	2.89067e-08	2.7372e-08	2.07663e-11
Glyma.02G193700	10	0	0	0	8	0	4	8	8	8	0	2	8	4	0	0	0	0	0	0	0	8	0	8	10	0	0	0	0	10	76	1.10331e-12	2.89067e-08	2.7372e-08	2.07663e-11
Glyma.06G201700	4	0	0	0	6	0	0	10	4	10	0	0	10	4	4	0	4	0	0	2	0	4	4	4	4	10	2	0	0	10	76	1.10331e-12	2.89067e-08	2.7372e-08	2.07663e-11
Glyma.15G219050	8	0	0	1	8	0	0	4	9	4	0	0	10	0	4	0	11	0	0	1	0	2	0	0	9	8	7	0	0	10	76	1.10331e-12	2.89067e-08	2.7372e-08	2.07663e-11
Glyma.15G249400	6	0	0	0	6	0	0	6	6	6	0	4	6	2	4	0	4	4	0	2	0	6	6	4	6	4	4	0	0	10	76	1.10331e-12	2.89067e-08	2.7372e-08	2.07663e-11
Glyma.01G091400	6	0	1	0	5	2	6	0	6	0	0	3	0	0	4	0	6	0	0	0	0	0	4	2	6	6	4	1	0	3	59	1.14367e-12	2.99643e-08	2.83711e-08	2.14952e-11
Glyma.13G028200	7	0	0	3	1	0	0	1	5	1	0	2	1	0	2	0	8	2	0	0	0	4	7	3	7	5	2	1	0	3	59	1.14367e-12	2.99643e-08	2.83711e-08	2.14952e-11
Glyma.03G057300	6	0	1	0	2	0	0	6	7	6	0	1	6	1	3	0	7	0	0	2	0	5	2	0	6	7	7	1	0	7	69	1.14466e-12	2.99902e-08	2.83945e-08	2.14983e-11
Glyma.01G121272	7	0	0	0	2	4	5	6	7	6	0	0	5	0	1	0	6	0	0	3	0	6	0	0	5	3	3	0	0	5	64	1.22285e-12	3.20387e-08	3.03328e-08	2.29503e-11
Glyma.18G155150	7	0	0	0	5	0	0	10	6	10	0	2	9	1	3	0	6	0	0	0	0	4	4	1	11	5	3	2	0	11	78	1.22977e-12	3.22199e-08	3.0502e-08	2.30472e-11
Glyma.19G067900	8	0	2	0	0	0	0	0	6	0	0	1	10	0	7	0	10	0	0	1	0	7	8	1	9	11	7	1	0	11	78	1.22977e-12	3.22199e-08	3.0502e-08	2.30472e-11
Glyma.10G126700	8	0	0	0	8	0	0	2	2	2	0	0	2	0	2	0	2	0	0	0	0	8	2	2	4	8	6	0	0	2	56	1.33583e-12	3.49986e-08	3.31271e-08	2.49634e-11
Glyma.01G118000	8	0	0	0	4	2	8	0	0	0	0	0	2	0	2	0	8	0	0	0	0	6	2	0	6	6	4	0	0	2	56	1.33583e-12	3.49986e-08	3.31271e-08	2.49634e-11
Glyma.04G188800	6	0	0	0	0	0	0	0	6	0	0	2	0	0	0	0	8	4	0	0	0	6	0	2	8	10	6	0	0	2	56	1.33583e-12	3.49986e-08	3.31271e-08	2.49634e-11
Glyma.06G285200	4	0	0	0	4	0	0	4	4	4	0	2	0	2	4	0	2	2	0	0	0	4	4	2	4	4	4	4	0	2	56	1.33583e-12	3.49986e-08	3.31271e-08	2.49634e-11
Glyma.06G182200	8	0	0	2	8	0	0	8	8	8	0	4	8	0	0	0	10	2	0	2	0	8	2	0	2	8	2	2	0	12	80	1.34607e-12	3.5267e-08	3.33731e-08	2.50476e-11
Glyma.06G202900	8	0	0	0	4	0	0	4	8	4	0	4	8	0	4	0	8	4	0	4	4	8	4	4	4	4	4	0	0	12	80	1.34607e-12	3.5267e-08	3.33731e-08	2.50476e-11
Glyma.12G129600	12	0	0	0	0	0	0	8	8	8	0	0	12	0	4	0	16	0	0	0	0	0	0	4	12	8	0	0	0	12	80	1.34607e-12	3.5267e-08	3.33731e-08	2.50476e-11
Glyma.12G138100	4	0	0	0	6	0	0	4	12	4	0	0	12	2	6	0	8	0	0	2	0	8	6	0	10	4	4	0	0	12	80	1.34607e-12	3.5267e-08	3.33731e-08	2.50476e-11
Glyma.13G244300	4	0	0	0	4	0	0	12	4	12	0	8	4	0	4	0	4	0	0	4	0	4	8	4	4	4	4	4	0	12	80	1.34607e-12	3.5267e-08	3.33731e-08	2.50476e-11
Glyma.18G253600	4	0	0	0	8	0	0	8	8	8	0	4	8	0	4	0	8	4	0	4	0	8	4	0	4	4	4	0	0	12	80	1.34607e-12	3.5267e-08	3.33731e-08	2.50476e-11
Glyma.03G066500	6	0	1	0	4	0	0	9	7	9	0	2	11	1	2	0	9	1	0	1	0	5	4	0	8	8	6	1	0	13	82	1.44936e-12	3.79732e-08	3.59325e-08	2.69505e-11
Glyma.01G073000	10	0	0	0	4	6	4	4	6	4	0	0	14	0	0	0	24	0	0	0	0	0	0	0	18	4	0	0	0	14	84	1.53746e-12	4.02814e-08	3.80706e-08	2.79927e-11
Glyma.01G097900	4	0	0	0	4	6	6	6	4	6	0	0	6	0	0	0	8	0	0	0	0	2	4	0	6	6	4	0	0	6	66	1.53746e-12	4.02814e-08	3.80706e-08	2.79927e-11
Glyma.01G229200	5	0	0	0	0	0	0	0	10	0	0	0	0	0	0	0	0	0	0	0	5	5	0	5	5	10	5	0	0	0	50	1.53746e-12	4.02814e-08	3.80706e-08	2.79927e-11
Glyma.02G055200	6	0	6	0	0	0	6	0	6	0	0	6	0	0	0	0	6	0	0	0	0	6	6	6	6	6	6	0	0	6	66	1.53746e-12	4.02814e-08	3.80706e-08	2.79927e-11
Glyma.02G222000	6	0	0	0	0	0	0	6	6	6	0	0	6	0	0	0	6	6	0	6	0	6	6	6	6	0	0	0	0	6	66	1.53746e-12	4.02814e-08	3.80706e-08	2.79927e-11
Glyma.05G093000	6	0	0	0	6	0	0	9	9	9	0	0	6	0	0	0	3	0	0	0	0	3	3	0	3	9	6	0	0	6	66	1.53746e-12	4.02814e-08	3.80706e-08	2.79927e-11
Glyma.05G212800	4	0	0	0	0	0	0	6	6	6	0	0	6	0	6	0	4	0	0	0	2	0	8	6	4	6	4	4	0	6	66	1.53746e-12	4.02814e-08	3.80706e-08	2.79927e-11
Glyma.06G213525	6	0	0	0	3	0	0	6	6	6	0	0	6	0	3	0	6	0	0	3	0	6	3	0	6	6	6	0	0	6	66	1.53746e-12	4.02814e-08	3.80706e-08	2.79927e-11
Glyma.08G159400	3	0	3	0	9	0	0	6	3	6	0	3	3	0	3	0	0	0	0	0	0	0	9	3	9	3	3	6	0	6	66	1.53746e-12	4.02814e-08	3.80706e-08	2.79927e-11
Glyma.10G105800	6	0	0	0	4	0	0	6	6	6	0	0	6	2	2	0	6	0	0	2	0	0	2	4	8	4	6	2	0	6	66	1.53746e-12	4.02814e-08	3.80706e-08	2.79927e-11
Glyma.10G197600	6	0	2	0	4	0	0	6	6	6	0	0	6	0	2	0	4	0	0	0	0	6	6	0	6	6	4	2	0	6	66	1.53746e-12	4.02814e-08	3.80706e-08	2.79927e-11
Glyma.11G242200	6	0	0	0	0	0	0	0	12	0	0	6	0	0	24	0	6	0	0	0	0	0	6	6	6	0	0	0	0	6	66	1.53746e-12	4.02814e-08	3.80706e-08	2.79927e-11
Glyma.12G011800	6	0	0	0	4	0	0	6	0	6	0	0	0	0	0	0	6	0	0	0	0	6	4	0	4	4	4	0	0	0	50	1.53746e-12	4.02814e-08	3.80706e-08	2.79927e-11
Glyma.13G227900	8	0	0	3	0	0	0	0	0	0	0	0	0	5	0	0	8	3	0	7	1	0	4	0	0	7	1	3	0	0	50	1.53746e-12	4.02814e-08	3.80706e-08	2.79927e-11
Glyma.14G139800	12	0	0	0	0	0	0	9	6	9	0	0	6	0	3	0	3	0	0	0	0	0	6	0	6	6	6	0	0	6	66	1.53746e-12	4.02814e-08	3.80706e-08	2.79927e-11
Glyma.14G162451	6	0	0	0	2	0	0	4	14	4	0	1	5	0	5	0	16	0	0	0	0	0	2	1	5	4	1	2	0	6	66	1.53746e-12	4.02814e-08	3.80706e-08	2.79927e-11
Glyma.14G215300	6	0	0	0	6	0	0	6	0	6	0	6	0	0	6	0	6	0	0	6	0	6	6	6	0	0	6	0	0	6	66	1.53746e-12	4.02814e-08	3.80706e-08	2.79927e-11
Glyma.15G167400	8	0	0	0	2	0	0	10	6	10	0	8	6	0	2	0	2	0	0	2	0	8	2	6	8	10	8	0	0	14	84	1.53746e-12	4.02814e-08	3.80706e-08	2.79927e-11
Glyma.15G167500	14	0	0	0	7	0	0	7	14	7	0	0	14	0	7	0	7	0	0	0	0	0	0	0	14	7	0	0	0	14	84	1.53746e-12	4.02814e-08	3.80706e-08	2.79927e-11
Glyma.18G151700	6	0	0	0	6	0	0	6	10	6	0	0	14	0	8	0	10	0	0	2	0	2	4	2	12	6	4	0	0	14	84	1.53746e-12	4.02814e-08	3.80706e-08	2.79927e-11
Glyma.18G181100	10	0	0	0	4	0	0	4	4	4	0	2	4	2	4	2	4	0	0	0	0	4	8	4	4	4	4	0	0	6	66	1.53746e-12	4.02814e-08	3.80706e-08	2.79927e-11
Glyma.19G246400	20	0	0	0	10	0	0	0	0	0	0	0	0	0	0	0	10	0	0	0	0	0	0	0	10	0	0	0	0	0	50	1.53746e-12	4.02814e-08	3.80706e-08	2.79927e-11
Glyma.03G186300	0	0	10	0	0	0	0	0	0	0	0	0	0	0	10	0	10	0	0	0	0	0	0	10	0	10	0	0	0	0	50	1.53746e-12	4.02814e-08	3.80706e-08	2.79927e-11
Glyma.08G148300	0	0	0	0	5	0	0	15	0	15	0	0	0	0	0	0	0	0	0	0	0	0	0	0	15	0	0	0	0	0	50	1.53746e-12	4.02814e-08	3.80706e-08	2.79927e-11
Glyma.13G276700	0	0	0	0	0	0	0	6	0	6	0	0	6	0	0	0	12	12	0	0	0	0	0	0	12	0	6	12	0	6	66	1.53746e-12	4.02814e-08	3.80706e-08	2.79927e-11
Glyma.13G035200	0	0	0	0	0	0	0	0	10	0	0	0	0	2	0	0	0	0	0	0	0	2	0	10	6	10	10	0	0	0	50	1.53746e-12	4.02814e-08	3.80706e-08	2.79927e-11
Glyma.04G192200	0	0	0	0	0	0	0	0	0	0	0	0	0	0	0	0	30	0	0	0	0	0	0	0	0	0	20	0	0	0	50	1.53746e-12	4.02814e-08	3.80706e-08	2.79927e-11
Glyma.08G112100	0	0	0	0	0	0	0	0	0	0	0	0	0	0	0	0	10	0	0	0	0	0	0	0	10	10	10	10	0	0	50	1.53746e-12	4.02814e-08	3.80706e-08	2.79927e-11
Glyma.15G031400	0	0	0	0	0	0	0	0	0	0	0	0	0	0	0	0	30	0	0	0	0	0	0	0	20	0	0	0	0	0	50	1.53746e-12	4.02814e-08	3.80706e-08	2.79927e-11
Glyma.19G037200	0	0	0	0	0	0	0	0	0	0	0	0	0	0	0	0	15	0	0	0	0	0	10	0	20	0	0	5	0	0	50	1.53746e-12	4.02814e-08	3.80706e-08	2.79927e-11
Glyma.09G067300	2	0	0	0	6	0	0	7	7	7	0	2	2	3	2	0	2	0	0	0	0	5	6	4	7	2	1	0	0	4	61	1.54956e-12	4.05985e-08	3.83671e-08	2.81739e-11
Glyma.15G205800	10	0	0	0	0	0	0	14	6	14	0	0	4	0	0	0	4	0	0	0	0	1	2	0	6	3	1	0	0	4	61	1.54956e-12	4.05985e-08	3.83671e-08	2.81739e-11
Glyma.18G135051	4	0	1	0	0	0	0	3	12	3	0	1	8	0	2	0	13	0	0	0	0	2	7	3	12	9	2	0	0	9	73	1.57616e-12	4.12954e-08	3.90242e-08	2.86376e-11
Glyma.16G121900	16	0	0	0	8	0	0	8	8	8	0	0	16	0	8	0	8	0	0	0	0	8	0	0	8	8	0	0	0	16	88	1.66286e-12	4.35669e-08	4.11608e-08	3.00877e-11
Glyma.19G165500	8	0	8	0	0	0	0	8	8	8	8	8	0	8	0	0	8	0	0	0	0	0	16	8	8	0	0	0	0	16	88	1.66286e-12	4.35669e-08	4.11608e-08	3.00877e-11
Glyma.20G060100	16	0	0	0	12	0	0	4	4	4	0	0	16	0	0	0	12	0	0	0	0	4	4	4	8	12	0	4	0	16	88	1.66286e-12	4.35669e-08	4.11608e-08	3.00877e-11
Glyma.05G145500	0	0	0	0	8	0	0	8	8	8	0	8	8	8	8	0	8	0	0	0	0	8	8	0	0	8	8	0	0	16	88	1.66286e-12	4.35669e-08	4.11608e-08	3.00877e-11
Glyma.12G148100	0	0	0	0	8	0	0	0	8	0	0	4	12	8	8	0	8	0	0	8	8	8	8	0	8	0	0	8	0	16	88	1.66286e-12	4.35669e-08	4.11608e-08	3.00877e-11
Glyma.02G203200	8	0	0	0	8	0	0	8	8	8	0	8	8	0	0	0	0	0	0	0	0	8	8	8	8	8	8	0	0	16	88	1.66286e-12	4.35669e-08	4.11608e-08	3.00877e-11
Glyma.15G164100	10	0	0	0	0	0	0	12	14	12	0	4	16	4	6	0	0	0	0	0	0	6	8	6	6	8	4	0	0	20	96	1.70843e-12	4.4761e-08	4.22855e-08	3.08696e-11
Glyma.19G140100	0	0	0	0	8	0	0	8	8	8	4	8	8	0	8	0	0	0	0	0	0	8	8	8	8	8	8	8	0	20	96	1.70843e-12	4.4761e-08	4.22855e-08	3.08696e-11
Glyma.14G136700	5	0	0	0	0	0	0	10	10	10	0	0	10	0	0	0	10	0	0	0	0	0	5	0	15	10	0	0	0	10	75	1.7861e-12	4.67957e-08	4.42005e-08	3.21841e-11
Glyma.19G071300	10	0	0	0	0	0	0	15	0	15	0	0	10	0	5	0	15	0	0	0	0	0	0	0	10	5	0	0	0	10	75	1.7861e-12	4.67957e-08	4.42005e-08	3.21841e-11
Glyma.04G123600	0	0	5	0	5	0	0	5	5	5	0	5	5	5	5	0	5	0	0	5	0	5	5	0	5	5	5	5	0	10	75	1.7861e-12	4.67957e-08	4.42005e-08	3.21841e-11
Glyma.14G110000	0	0	0	0	0	0	0	10	10	10	0	0	10	0	5	0	20	0	0	0	0	0	5	5	5	5	0	0	0	10	75	1.7861e-12	4.67957e-08	4.42005e-08	3.21841e-11
Glyma.09G058200	5	0	1	0	7	0	0	3	3	3	0	0	3	0	2	0	6	4	0	0	1	0	2	6	10	4	1	0	0	3	58	1.89461e-12	4.96388e-08	4.68822e-08	3.40926e-11
Glyma.13G029900	6	0	1	0	2	0	0	3	8	3	0	0	3	2	0	0	8	0	0	0	0	5	5	0	7	4	3	1	0	3	58	1.89461e-12	4.96388e-08	4.68822e-08	3.40926e-11
Glyma.04G113300	5	0	0	0	1	0	0	2	5	2	0	2	3	0	5	0	6	0	0	0	0	5	5	3	8	5	6	5	0	5	63	2.01368e-12	5.27585e-08	4.98265e-08	3.62103e-11
Glyma.08G274400	4	0	0	0	6	0	0	8	6	8	0	2	6	0	2	0	6	0	0	2	0	6	2	4	6	6	4	0	0	8	70	2.21682e-12	5.80806e-08	5.48507e-08	3.98358e-11
Glyma.13G000200	10	0	0	0	0	0	0	1	8	1	0	0	1	0	0	0	8	0	0	1	0	5	1	1	7	6	3	0	0	1	52	2.46301e-12	6.45308e-08	6.09398e-08	4.42295e-11
Glyma.01G138800	4	0	0	0	4	0	4	4	4	4	0	0	4	0	4	0	4	0	0	0	0	4	4	4	4	4	4	4	0	4	60	2.55963e-12	6.70622e-08	6.3256e-08	4.50687e-11
Glyma.01G157700	12	0	0	0	0	0	6	0	6	0	0	0	9	0	0	0	0	0	0	0	0	9	0	6	9	9	9	6	0	9	72	2.55963e-12	6.70622e-08	6.3256e-08	4.50687e-11
Glyma.02G195000	11	0	0	0	11	0	11	11	11	11	0	11	11	0	0	0	0	0	0	0	0	11	0	11	11	0	0	0	0	22	99	2.55963e-12	6.70622e-08	6.3256e-08	4.50687e-11
Glyma.03G070600	5	0	0	0	5	0	0	5	5	5	0	5	10	5	5	0	10	0	0	0	5	5	5	5	5	5	5	5	0	15	85	2.55963e-12	6.70622e-08	6.3256e-08	4.50687e-11
Glyma.05G105000	4	0	0	0	4	0	0	4	4	4	0	0	4	0	4	0	4	4	0	4	0	4	4	4	4	4	4	0	0	4	60	2.55963e-12	6.70622e-08	6.3256e-08	4.50687e-11
Glyma.06G196900	6	0	6	0	3	0	0	3	6	3	3	3	3	3	6	0	6	0	0	0	0	6	3	3	6	6	6	0	0	9	72	2.55963e-12	6.70622e-08	6.3256e-08	4.50687e-11
Glyma.06G222800	4	0	0	0	6	0	0	4	6	4	0	0	4	0	4	0	6	0	0	2	0	4	4	2	6	4	2	2	0	4	60	2.55963e-12	6.70622e-08	6.3256e-08	4.50687e-11
Glyma.07G203300	4	0	0	0	4	0	0	4	4	4	0	4	0	0	4	0	4	0	0	4	0	4	4	4	4	4	4	4	0	4	60	2.55963e-12	6.70622e-08	6.3256e-08	4.50687e-11
Glyma.07G206000	6	0	0	0	6	0	0	6	6	6	0	3	6	0	0	0	6	0	0	6	0	6	6	0	6	6	6	0	0	9	72	2.55963e-12	6.70622e-08	6.3256e-08	4.50687e-11
Glyma.08G250402	6	0	0	0	3	0	0	6	6	6	0	3	6	0	6	0	9	0	0	0	0	0	3	6	6	6	6	3	0	9	72	2.55963e-12	6.70622e-08	6.3256e-08	4.50687e-11
Glyma.09G097200	8	0	0	0	7	0	0	10	6	10	0	1	8	0	3	0	6	0	0	0	0	3	1	1	11	5	0	1	0	9	72	2.55963e-12	6.70622e-08	6.3256e-08	4.50687e-11
Glyma.10G158800	7	0	0	0	7	0	0	7	7	7	0	0	0	0	0	0	0	0	0	0	0	7	0	0	7	0	0	0	0	0	49	2.55963e-12	6.70622e-08	6.3256e-08	4.50687e-11
Glyma.10G164300	4	0	4	0	4	0	0	4	4	4	0	0	4	4	4	0	4	0	0	0	0	4	4	4	4	4	4	0	0	4	60	2.55963e-12	6.70622e-08	6.3256e-08	4.50687e-11
Glyma.11G062300	4	0	0	0	4	0	0	4	0	4	0	4	0	4	4	0	4	0	0	4	0	4	4	4	4	4	4	4	0	4	60	2.55963e-12	6.70622e-08	6.3256e-08	4.50687e-11
Glyma.12G152700	4	0	0	0	4	0	0	4	6	4	0	0	4	0	6	0	8	0	0	0	0	4	6	0	6	4	2	2	0	4	60	2.55963e-12	6.70622e-08	6.3256e-08	4.50687e-11
Glyma.13G003400	8	0	0	0	0	0	0	0	4	0	0	4	0	4	0	0	8	0	0	4	0	8	8	8	4	4	0	0	0	4	60	2.55963e-12	6.70622e-08	6.3256e-08	4.50687e-11
Glyma.13G172400	7	0	7	0	0	0	0	0	7	0	0	0	0	0	0	0	7	0	0	0	0	7	0	7	0	7	0	0	0	0	49	2.55963e-12	6.70622e-08	6.3256e-08	4.50687e-11
Glyma.13G227800	9	0	0	2	0	0	0	0	0	0	0	0	0	2	0	0	10	2	0	6	2	0	2	0	0	8	0	6	0	0	49	2.55963e-12	6.70622e-08	6.3256e-08	4.50687e-11
Glyma.13G279400	4	0	0	0	4	0	0	4	4	4	0	0	4	0	4	0	4	4	0	0	0	4	4	4	4	4	4	4	0	4	60	2.55963e-12	6.70622e-08	6.3256e-08	4.50687e-11
Glyma.14G024300	12	0	8	0	4	0	0	4	0	4	0	4	0	4	0	0	4	0	0	0	0	4	0	0	4	4	4	4	0	4	60	2.55963e-12	6.70622e-08	6.3256e-08	4.50687e-11
Glyma.16G115000	9	0	0	0	9	0	0	0	0	0	0	0	9	9	9	0	6	0	0	0	0	0	3	3	9	3	3	9	0	9	72	2.55963e-12	6.70622e-08	6.3256e-08	4.50687e-11
Glyma.17G179400	10	0	0	0	0	0	0	4	0	4	0	4	0	2	0	0	12	0	0	0	0	12	2	2	2	4	4	2	0	4	60	2.55963e-12	6.70622e-08	6.3256e-08	4.50687e-11
Glyma.17G188500	9	0	0	0	1	0	0	9	4	9	0	2	4	0	1	0	7	0	0	1	0	5	1	0	8	7	2	1	0	6	65	2.52313e-12	6.6106e-08	6.24247e-08	4.50687e-11
Glyma.18G074300	6	0	0	0	12	0	0	0	18	0	0	12	18	0	12	0	0	0	0	0	0	0	0	18	18	18	12	0	0	30	114	2.55963e-12	6.70622e-08	6.3256e-08	4.50687e-11
Glyma.19G011700	7	0	0	0	0	0	0	0	7	0	0	0	0	0	0	0	0	0	0	0	0	7	7	0	7	14	0	0	0	0	49	2.55963e-12	6.70622e-08	6.3256e-08	4.50687e-11
Glyma.19G056500	7	1	1	0	1	0	0	5	6	5	0	1	8	0	4	0	10	0	0	2	0	7	3	3	7	7	3	0	0	9	72	2.55963e-12	6.70622e-08	6.3256e-08	4.50687e-11
Glyma.20G180100	9	0	0	0	6	0	0	3	3	3	0	0	9	0	3	0	3	6	0	0	0	6	0	0	6	9	9	6	0	9	72	2.55963e-12	6.70622e-08	6.3256e-08	4.50687e-11
Glyma.09G209900	0	0	0	0	6	0	0	6	6	6	0	3	6	3	6	0	6	3	0	0	0	6	0	6	3	6	6	3	0	9	72	2.55963e-12	6.70622e-08	6.3256e-08	4.50687e-11
Glyma.11G251500	0	0	0	0	9	0	0	9	9	9	0	9	0	9	9	0	0	0	0	0	0	9	9	0	0	0	0	0	0	9	72	2.55963e-12	6.70622e-08	6.3256e-08	4.50687e-11
Glyma.13G028000	10	0	0	0	2	0	0	4	6	4	0	0	10	0	0	0	14	0	0	2	0	2	6	0	10	10	2	2	0	10	74	2.88999e-12	7.57177e-08	7.14117e-08	5.07832e-11
Glyma.16G094600	6	0	0	0	4	0	0	6	26	6	0	0	10	0	2	0	6	0	0	0	0	0	4	0	8	4	2	0	0	10	74	2.88999e-12	7.57177e-08	7.14117e-08	5.07832e-11
Glyma.01G170700	0	0	0	0	8	0	6	6	6	6	0	6	4	6	8	0	6	4	0	0	0	6	6	0	6	0	0	0	0	10	74	2.88999e-12	7.57177e-08	7.14117e-08	5.07832e-11
Glyma.05G109200	5	0	0	0	5	0	0	5	5	5	0	2	5	0	0	0	5	2	1	5	0	5	5	4	5	5	5	0	0	7	67	3.06179e-12	8.0219e-08	7.56538e-08	5.37661e-11
Glyma.03G039309	0	1	1	0	2	0	0	6	0	6	0	2	1	0	0	0	13	0	0	0	1	4	3	8	6	3	2	1	0	3	57	3.13869e-12	8.22337e-08	7.75508e-08	5.50795e-11
Glyma.02G258100	5	0	2	0	5	0	0	5	5	5	0	0	5	0	5	0	5	0	0	0	0	5	4	4	5	1	5	1	0	5	62	3.31548e-12	8.68656e-08	8.19156e-08	5.8143e-11
Glyma.03G001600	6	0	0	0	6	0	0	6	6	6	0	6	6	0	6	0	6	6	0	0	0	6	6	6	6	0	0	6	0	12	78	3.47568e-12	9.10629e-08	8.58563e-08	6.07491e-11
Glyma.06G220566	7	0	0	0	3	0	0	11	7	11	0	0	12	0	1	0	7	0	0	2	0	4	5	0	10	6	4	0	0	12	78	3.47568e-12	9.10629e-08	8.58563e-08	6.07491e-11
Glyma.07G020900	6	0	3	0	0	0	0	6	6	6	0	6	6	6	6	0	6	0	0	0	0	6	0	3	6	6	6	6	0	12	78	3.47568e-12	9.10629e-08	8.58563e-08	6.07491e-11
Glyma.15G153000	9	0	0	0	9	0	0	3	3	3	0	3	9	9	3	0	3	3	0	3	0	9	6	0	9	3	3	0	0	12	78	3.47568e-12	9.10629e-08	8.58563e-08	6.07491e-11
Glyma.16G094000	4	0	0	0	2	0	0	8	20	8	0	0	12	0	4	0	10	0	0	0	0	4	4	0	6	6	2	0	0	12	78	3.47568e-12	9.10629e-08	8.58563e-08	6.07491e-11
Glyma.06G205900	7	0	0	0	3	0	0	7	7	7	0	1	7	0	2	0	7	0	0	1	0	3	5	3	7	6	4	0	0	8	69	3.61179e-12	9.46288e-08	8.92147e-08	6.30859e-11
Glyma.11G205900	8	0	0	0	2	0	0	2	8	2	0	0	2	0	2	0	2	0	0	2	0	2	2	4	6	8	2	2	0	2	54	3.68427e-12	9.65277e-08	9.09977e-08	6.42661e-11
Glyma.18G104600	6	0	3	0	18	0	0	15	9	15	0	9	15	0	3	0	3	3	0	3	0	3	3	0	15	3	0	0	0	24	102	3.68427e-12	9.65277e-08	9.09977e-08	6.42661e-11
Glyma.03G066800	10	0	0	0	4	0	0	8	8	8	0	2	12	0	4	0	12	0	0	0	0	2	4	0	10	8	4	0	0	14	82	3.91487e-12	1.0257e-07	9.66817e-08	6.81526e-11
Glyma.12G232100	8	0	4	2	0	0	0	6	8	6	2	12	0	2	10	0	6	2	4	2	4	2	2	4	2	4	0	2	2	14	82	3.91487e-12	1.0257e-07	9.66817e-08	6.81526e-11
Glyma.19G055966	10	0	2	0	0	0	0	2	10	2	0	2	12	2	6	0	10	0	0	2	0	8	6	0	8	8	6	0	0	14	82	3.91487e-12	1.0257e-07	9.66817e-08	6.81526e-11
Glyma.08G264701	15	0	0	0	2	0	0	14	7	14	3	1	11	0	0	0	7	0	0	1	0	3	2	0	9	5	3	2	0	15	84	4.06909e-12	1.0661e-07	1.00486e-07	7.07902e-11
Glyma.03G036200	5	0	1	0	5	0	0	4	5	4	0	1	0	1	2	0	3	0	0	1	0	2	1	3	4	5	4	1	0	1	51	4.09822e-12	1.07373e-07	1.01197e-07	7.12024e-11
Glyma.15G211200	0	0	0	0	9	0	0	0	12	0	0	9	12	6	12	0	12	0	0	0	0	9	0	3	9	18	3	3	0	21	96	4.09822e-12	1.07373e-07	1.01197e-07	7.12024e-11
Glyma.09G191600	4	0	0	0	4	0	0	4	4	4	0	2	4	4	4	2	4	2	0	2	0	4	4	2	4	4	4	4	0	6	64	4.13977e-12	1.08462e-07	1.02203e-07	7.16867e-11
Glyma.10G058200	4	0	2	0	4	0	0	6	8	6	0	4	2	0	2	0	8	0	0	4	0	4	0	4	6	2	4	0	0	6	64	4.13977e-12	1.08462e-07	1.02203e-07	7.16867e-11
Glyma.14G141400	5	0	1	0	3	0	0	5	6	5	0	0	6	0	3	0	14	0	0	2	0	3	3	1	8	4	1	0	0	6	64	4.13977e-12	1.08462e-07	1.02203e-07	7.16867e-11
Glyma.18G181300	10	0	0	0	4	0	0	4	4	4	0	2	4	2	4	0	4	0	0	0	0	4	10	4	4	4	2	0	0	6	64	4.13977e-12	1.08462e-07	1.02203e-07	7.16867e-11
Glyma.19G120400	4	0	4	0	4	0	0	4	4	4	0	2	4	0	4	0	4	4	0	2	0	4	4	4	4	4	4	2	0	6	64	4.13977e-12	1.08462e-07	1.02203e-07	7.16867e-11
Glyma.18G181700	12	0	0	0	6	0	0	4	7	4	0	2	7	0	3	0	4	0	0	0	0	7	1	5	7	8	3	0	0	9	71	4.15488e-12	1.08858e-07	1.02571e-07	7.19008e-11
Glyma.03G063000	6	0	0	0	6	0	0	8	8	8	0	0	16	2	2	0	18	0	0	0	0	2	4	0	12	6	2	2	0	16	86	4.17779e-12	1.09458e-07	1.03133e-07	7.22496e-11
Glyma.09G058800	8	0	0	0	0	0	0	0	0	0	0	0	0	0	0	0	8	0	0	0	0	0	8	0	8	8	4	4	0	0	48	4.26219e-12	1.11669e-07	1.05101e-07	7.24186e-11
Glyma.09G216400	12	0	0	0	0	0	0	0	0	0	0	0	0	0	0	0	0	0	0	0	0	0	0	0	12	12	12	0	0	0	48	4.26219e-12	1.11669e-07	1.05101e-07	7.24186e-11
Glyma.09G225700	8	0	0	0	0	0	0	0	0	0	0	0	0	0	0	0	0	0	0	0	0	0	8	0	8	8	8	8	0	0	48	4.26219e-12	1.11669e-07	1.05101e-07	7.24186e-11
Glyma.10G037700	5	0	0	0	5	0	0	6	6	6	0	0	4	1	5	0	5	0	0	1	0	0	2	5	6	6	0	0	0	4	59	4.22783e-12	1.10769e-07	1.0436e-07	7.24186e-11
Glyma.10G186500	6	0	0	0	0	0	0	3	0	3	0	0	0	0	0	0	6	0	0	6	0	0	6	6	6	0	6	0	0	0	48	4.26219e-12	1.11669e-07	1.05101e-07	7.24186e-11
Glyma.11G154500	12	0	3	0	0	0	0	0	0	0	0	0	0	0	0	0	12	0	0	0	0	0	9	0	12	0	0	0	0	0	48	4.26219e-12	1.11669e-07	1.05101e-07	7.24186e-11
Glyma.13G036400	6	0	0	0	0	0	0	12	6	12	0	0	0	0	0	0	0	0	0	0	0	0	6	0	0	6	0	0	0	0	48	4.26219e-12	1.11669e-07	1.05101e-07	7.24186e-11
Glyma.14G044800	9	0	6	0	0	0	0	9	0	9	0	0	0	6	0	0	9	0	0	0	0	0	0	0	0	0	0	0	0	0	48	4.26219e-12	1.11669e-07	1.05101e-07	7.24186e-11
Glyma.14G098900	4	0	0	0	0	0	0	8	8	8	0	0	0	0	4	0	4	0	0	0	0	0	0	0	0	4	4	4	0	0	48	4.26219e-12	1.11669e-07	1.05101e-07	7.24186e-11
Glyma.14G204700	4	0	0	0	4	0	0	0	0	0	0	0	0	0	0	0	12	0	0	4	0	4	0	8	12	0	0	0	0	0	48	4.26219e-12	1.11669e-07	1.05101e-07	7.24186e-11
Glyma.15G231351	11	1	2	0	5	0	0	10	12	10	0	2	17	1	5	0	0	0	0	0	0	13	4	4	12	1	1	0	0	19	92	4.24265e-12	1.11157e-07	1.04721e-07	7.24186e-11
Glyma.18G238700	2	0	2	0	0	0	0	2	8	2	0	0	0	0	2	0	6	0	0	0	0	2	2	6	2	8	4	0	0	0	48	4.26219e-12	1.11669e-07	1.05101e-07	7.24186e-11
Glyma.19G015900	6	0	6	0	0	0	0	0	6	0	0	0	0	6	0	0	6	0	0	0	0	0	6	0	6	6	0	0	0	0	48	4.26219e-12	1.11669e-07	1.05101e-07	7.24186e-11
Glyma.19G247600	0	0	6	0	0	0	0	0	6	0	0	0	0	6	0	0	0	0	0	6	0	0	6	6	0	6	6	0	0	0	48	4.26219e-12	1.11669e-07	1.05101e-07	7.24186e-11
Glyma.02G170600	0	0	0	0	8	0	8	8	0	8	0	0	0	8	0	0	0	0	0	0	0	0	0	0	0	4	4	0	0	0	48	4.26219e-12	1.11669e-07	1.05101e-07	7.24186e-11
Glyma.06G233600	0	0	0	0	12	0	0	0	12	0	0	0	0	0	0	0	0	0	0	0	0	0	0	0	20	0	4	0	0	0	48	4.26219e-12	1.11669e-07	1.05101e-07	7.24186e-11
Glyma.07G072400	0	0	0	0	0	0	0	9	0	9	0	0	0	0	0	0	9	0	0	0	0	0	0	0	9	9	3	0	0	0	48	4.26219e-12	1.11669e-07	1.05101e-07	7.24186e-11
Glyma.13G033200	0	0	0	0	0	0	0	3	8	3	0	0	0	0	0	0	0	1	0	0	2	6	2	3	2	8	6	4	0	0	48	4.26219e-12	1.11669e-07	1.05101e-07	7.24186e-11
Glyma.09G168400	0	0	0	0	0	0	0	0	0	0	0	0	0	0	0	0	16	0	8	0	0	0	8	16	0	0	0	0	0	0	48	4.26219e-12	1.11669e-07	1.05101e-07	7.24186e-11
Glyma.16G059700	0	0	0	0	0	0	0	0	0	0	0	0	0	0	0	0	18	0	0	0	0	0	6	0	0	12	12	0	0	0	48	4.26219e-12	1.11669e-07	1.05101e-07	7.24186e-11
Glyma.01G220900	4	0	0	0	0	0	4	4	4	4	0	0	0	0	0	0	4	0	0	0	0	0	4	4	4	4	4	4	0	0	48	4.26219e-12	1.11669e-07	1.05101e-07	7.24186e-11
Glyma.03G041500	6	0	1	0	6	0	0	7	1	7	0	1	3	1	2	0	2	1	0	2	0	5	3	2	6	3	4	0	0	4	59	4.22783e-12	1.10769e-07	1.0436e-07	7.24186e-11
Glyma.03G136500	3	0	0	0	3	0	0	6	3	6	0	0	0	3	0	0	3	0	3	0	0	6	3	3	3	0	3	0	0	0	48	4.26219e-12	1.11669e-07	1.05101e-07	7.24186e-11
Glyma.06G041500	3	0	3	0	3	0	0	3	3	3	0	0	0	3	0	0	3	3	0	0	0	3	3	3	3	3	3	3	0	0	48	4.26219e-12	1.11669e-07	1.05101e-07	7.24186e-11
Glyma.06G265700	6	0	2	0	6	0	0	0	4	0	0	0	0	2	6	0	4	0	0	0	0	0	0	0	6	4	4	4	0	0	48	4.26219e-12	1.11669e-07	1.05101e-07	7.24186e-11
Glyma.07G036300	9	0	0	0	0	0	0	9	9	9	9	9	0	9	9	0	0	0	0	9	0	0	0	9	9	9	0	0	0	18	90	4.26219e-12	1.11669e-07	1.05101e-07	7.24186e-11
Glyma.07G078200	6	0	0	0	4	0	0	4	0	4	0	0	0	0	0	0	6	0	0	2	0	0	0	0	6	6	6	4	0	0	48	4.26219e-12	1.11669e-07	1.05101e-07	7.24186e-11
Glyma.15G217800	2	0	0	0	10	0	0	1	17	1	0	2	26	0	8	0	24	1	0	1	0	9	1	0	5	17	9	3	0	28	109	4.50698e-12	1.18083e-07	1.11133e-07	7.65281e-11
Glyma.17G182232	11	0	0	0	1	0	0	6	7	6	0	2	8	0	1	0	15	0	0	0	0	8	2	0	6	8	1	1	0	10	73	4.67374e-12	1.22452e-07	1.1524e-07	7.93083e-11
Glyma.01G108900	7	0	0	0	2	4	5	5	5	5	0	0	7	0	1	0	8	0	0	3	0	4	5	1	5	4	2	0	0	7	66	5.00524e-12	1.31137e-07	1.23404e-07	8.48236e-11
Glyma.06G206000	6	0	0	0	4	0	0	6	6	6	0	0	7	0	5	0	7	0	0	1	0	3	3	2	6	5	4	2	0	7	66	5.00524e-12	1.31137e-07	1.23404e-07	8.48236e-11
Glyma.16G084700	6	0	0	0	5	0	0	1	10	1	0	0	5	1	3	0	6	0	0	2	0	1	5	1	6	6	4	3	0	5	61	5.45804e-12	1.43001e-07	1.34563e-07	9.24375e-11
Glyma.20G039100	10	0	0	0	5	0	0	6	9	6	0	1	11	1	2	0	12	0	0	1	0	3	2	0	9	7	3	1	0	12	77	5.57978e-12	1.4619e-07	1.37558e-07	9.44381e-11
Glyma.02G162000	12	0	0	0	2	0	6	4	4	4	0	0	8	0	4	0	8	0	0	0	0	4	4	0	10	4	2	0	0	8	68	5.88227e-12	1.54116e-07	1.44951e-07	9.88554e-11
Glyma.04G257200	4	0	0	0	4	0	0	4	4	4	0	4	4	4	4	0	4	0	0	4	0	4	4	4	8	4	4	4	0	8	68	5.88227e-12	1.54116e-07	1.44951e-07	9.88554e-11
Glyma.06G225100	12	0	0	0	0	0	0	8	12	8	0	0	8	0	0	0	12	0	0	0	0	4	0	0	12	0	0	0	0	8	68	5.88227e-12	1.54116e-07	1.44951e-07	9.88554e-11
Glyma.08G015000	8	0	0	0	4	0	0	4	4	4	0	4	4	0	0	0	4	4	0	4	0	4	4	4	4	8	4	4	0	8	68	5.88227e-12	1.54115e-07	1.44951e-07	9.88554e-11
Glyma.14G141200	6	0	0	0	3	0	0	5	5	5	0	0	8	0	1	0	15	0	0	1	0	4	5	2	8	4	4	0	0	8	68	5.88227e-12	1.54115e-07	1.44951e-07	9.88554e-11
Glyma.17G177600	4	0	4	0	0	0	0	4	0	4	0	8	0	0	0	0	24	0	0	0	0	20	0	0	0	4	4	0	0	8	68	5.88227e-12	1.54115e-07	1.44951e-07	9.88554e-11
Glyma.18G036300	4	0	4	0	4	0	0	4	4	4	0	4	4	0	4	0	4	0	4	4	0	4	8	0	4	4	8	0	0	8	68	5.88227e-12	1.54115e-07	1.44951e-07	9.88554e-11
Glyma.18G144850	6	0	0	0	6	0	0	6	6	6	0	2	6	0	2	0	4	0	2	0	0	6	4	2	6	6	6	0	0	8	68	5.88227e-12	1.54115e-07	1.44951e-07	9.88554e-11
Glyma.18G152550	9	0	0	0	6	0	0	1	8	1	0	0	8	0	3	0	10	0	0	2	0	7	5	0	7	8	1	0	0	8	68	5.88227e-12	1.54115e-07	1.44951e-07	9.88554e-11
Glyma.19G054700	20	0	0	0	0	0	0	0	4	0	0	4	4	0	4	0	4	0	0	0	0	4	0	4	16	4	4	4	0	8	68	5.88227e-12	1.54115e-07	1.44951e-07	9.88554e-11
Glyma.20G122600	4	0	0	0	4	0	0	4	4	4	0	4	4	4	4	0	4	0	0	4	0	4	4	4	8	4	4	4	0	8	68	5.88227e-12	1.54115e-07	1.44951e-07	9.88554e-11
Glyma.16G174800	8	0	0	0	4	0	0	2	3	2	0	2	7	2	7	1	17	0	0	2	0	6	1	0	5	3	4	3	0	9	70	6.74121e-12	1.7662e-07	1.6611e-07	1.13218e-10
Glyma.04G152200	3	0	0	0	3	0	0	3	9	3	0	3	3	0	6	0	3	0	0	3	0	6	9	3	6	3	3	0	0	6	63	6.79061e-12	1.77914e-07	1.67287e-07	1.1361e-10
Glyma.08G330200	9	0	0	0	3	0	0	6	3	6	0	3	3	3	0	0	6	0	0	3	0	3	3	0	3	9	3	3	0	6	63	6.79061e-12	1.77914e-07	1.67287e-07	1.13611e-10
Glyma.14G103300	4	1	2	2	2	0	0	4	5	4	1	2	3	3	2	1	4	1	1	2	3	1	4	5	4	3	2	2	1	6	63	6.79061e-12	1.77914e-07	1.67287e-07	1.13611e-10
Glyma.15G119851	14	0	1	1	1	0	0	2	4	2	0	1	5	0	3	0	8	3	0	1	1	5	0	1	6	4	4	2	0	6	63	6.79061e-12	1.77914e-07	1.67287e-07	1.13611e-10
Glyma.16G102400	6	0	0	0	6	0	0	6	12	6	0	0	6	0	0	0	6	0	0	0	0	6	3	0	6	6	0	0	0	6	63	6.79061e-12	1.77914e-07	1.67287e-07	1.13611e-10
Glyma.19G086700	3	0	0	0	3	0	0	3	18	3	0	3	3	0	3	0	12	0	0	0	0	3	3	0	3	3	3	3	0	6	63	6.79061e-12	1.77914e-07	1.67287e-07	1.13611e-10
Glyma.09G087100	1	0	0	0	6	0	0	9	10	9	0	0	4	0	0	0	2	0	0	0	0	8	1	2	9	1	0	0	0	4	58	6.98279e-12	1.82949e-07	1.71986e-07	1.16454e-10
Glyma.10G160400	4	0	2	0	4	0	0	4	4	4	0	4	0	0	0	0	4	2	0	2	0	4	4	4	4	4	4	4	0	4	58	6.98279e-12	1.82949e-07	1.71986e-07	1.16454e-10
Glyma.16G217700	8	0	2	0	4	0	0	4	6	4	0	0	4	0	2	0	6	2	0	0	0	4	2	0	8	4	2	0	0	4	58	6.98279e-12	1.82949e-07	1.71986e-07	1.16454e-10
Glyma.17G215400	5	0	2	0	1	0	0	5	1	5	0	3	1	5	1	0	6	0	0	0	0	4	2	3	4	7	4	3	0	4	58	6.98279e-12	1.82949e-07	1.71986e-07	1.16454e-10
Glyma.02G057500	2	0	0	0	2	0	8	2	8	2	0	2	2	0	2	0	2	2	0	2	0	8	2	8	2	2	2	2	0	4	58	6.98279e-12	1.82949e-07	1.71986e-07	1.16454e-10
Glyma.01G193150	4	0	2	0	4	0	4	0	4	0	0	0	0	0	0	1	4	0	0	4	0	0	4	4	4	4	4	0	0	0	47	7.09867e-12	1.85985e-07	1.74833e-07	1.18311e-10
Glyma.08G250600	6	0	0	0	6	0	0	6	6	6	0	4	6	0	6	0	6	0	2	0	0	0	4	6	6	6	6	0	0	10	72	7.55441e-12	1.97926e-07	1.86035e-07	1.25667e-10
Glyma.13G196200	8	0	0	0	4	0	0	4	4	4	0	2	8	0	4	0	8	0	0	4	0	2	4	4	8	8	2	4	0	10	72	7.55441e-12	1.97926e-07	1.86035e-07	1.25667e-10
Glyma.16G169700	8	1	0	0	6	0	0	0	0	0	0	1	9	3	5	2	6	1	0	2	0	8	3	0	3	12	6	6	0	10	72	7.55441e-12	1.97926e-07	1.86035e-07	1.25667e-10
Glyma.15G187633	5	3	3	0	5	0	0	5	5	5	2	4	5	4	5	2	5	0	2	3	3	5	4	1	5	1	0	0	3	11	74	8.29777e-12	2.17402e-07	2.04333e-07	1.37945e-10
Glyma.14G120800	2	0	1	0	2	0	0	4	8	4	0	0	3	1	4	0	9	1	0	3	0	2	2	2	1	3	5	1	0	3	55	8.61459e-12	2.25702e-07	2.12117e-07	1.43031e-10
Glyma.18G232632	5	0	2	0	0	0	0	6	0	6	0	3	0	0	3	0	6	2	0	1	0	5	2	3	5	6	3	0	0	3	55	8.61459e-12	2.25702e-07	2.12117e-07	1.43031e-10
Glyma.10G227300	5	0	0	0	5	0	0	5	5	5	0	0	5	0	5	0	10	5	0	0	0	5	0	0	5	5	0	0	0	5	60	8.98377e-12	2.35375e-07	2.21144e-07	1.48501e-10
Glyma.18G173400	5	0	0	0	0	0	0	5	5	5	0	0	5	0	0	0	10	0	0	5	0	5	5	0	5	5	5	0	0	5	60	8.98377e-12	2.35375e-07	2.21144e-07	1.48501e-10
Glyma.19G054400	8	0	0	0	1	0	0	2	6	2	0	2	10	0	7	0	8	3	0	0	0	8	3	7	9	7	4	1	0	12	76	8.95177e-12	2.34536e-07	2.2041e-07	1.48501e-10
Glyma.20G238400	5	0	0	0	5	0	0	0	0	0	0	0	5	0	5	0	5	0	0	5	5	5	5	5	5	5	5	0	0	5	60	8.98377e-12	2.35375e-07	2.21144e-07	1.48501e-10
Glyma.09G141100	0	0	0	0	0	0	0	20	0	20	0	0	5	0	0	0	0	0	0	0	0	0	5	0	15	0	0	0	0	5	60	8.98377e-12	2.35375e-07	2.21144e-07	1.48501e-10
Glyma.03G161300	5	0	0	0	5	0	0	5	5	5	0	5	0	0	0	0	5	0	0	5	5	5	0	0	5	5	5	0	0	5	60	8.98377e-12	2.35375e-07	2.21144e-07	1.48501e-10
Glyma.07G090900	4	0	3	0	1	0	0	4	3	4	0	1	4	0	4	0	3	3	1	2	0	4	4	4	4	4	4	4	0	5	60	8.98377e-12	2.35375e-07	2.21144e-07	1.48501e-10
Glyma.18G155701	13	0	3	5	4	0	0	3	7	3	1	2	10	6	5	2	9	1	3	0	1	0	5	3	3	0	0	1	1	13	78	9.50198e-12	2.48952e-07	2.33882e-07	1.56869e-10
Glyma.03G242400	13	0	0	0	13	0	0	0	0	0	0	0	13	0	0	0	0	0	0	0	0	0	13	0	13	13	13	0	0	13	78	9.50198e-12	2.48952e-07	2.33882e-07	1.5687e-10
Glyma.06G245900	6	0	0	0	5	0	0	6	6	6	0	2	6	0	2	0	7	0	0	2	1	4	4	2	5	5	4	2	0	8	67	9.57617e-12	2.50896e-07	2.35698e-07	1.57995e-10
Glyma.02G039500	4	0	2	0	2	0	6	2	4	2	0	0	2	2	2	0	2	2	0	4	0	4	2	2	2	6	2	0	0	2	52	1.01656e-11	2.66339e-07	2.50165e-07	1.67298e-10
Glyma.04G142300	2	0	0	0	0	0	0	2	14	2	0	0	2	0	3	0	15	0	0	0	0	0	3	0	11	0	0	0	0	2	52	1.01656e-11	2.66339e-07	2.50165e-07	1.67298e-10
Glyma.15G209400	14	0	0	0	1	0	0	12	1	12	0	0	2	0	0	0	4	0	0	0	0	1	1	0	4	1	1	0	0	2	52	1.01656e-11	2.66339e-07	2.50165e-07	1.67298e-10
Glyma.U000501	6	0	0	0	4	0	0	6	3	6	0	0	2	2	3	0	3	0	0	2	0	3	2	0	5	5	2	0	0	2	52	1.01656e-11	2.66339e-07	2.50165e-07	1.67298e-10
Glyma.15G194701	6	0	0	0	6	0	0	6	11	6	1	2	16	1	5	0	8	1	0	3	0	12	3	3	6	6	5	2	0	19	90	1.04209e-11	2.73026e-07	2.56436e-07	1.71391e-10
Glyma.09G079400	8	0	0	0	12	0	0	8	8	8	0	4	12	0	4	0	0	0	0	0	0	8	0	0	12	12	4	0	0	16	84	1.04619e-11	2.74102e-07	2.57384e-07	1.71421e-10
Glyma.14G144700	8	0	0	0	0	0	0	16	12	16	0	0	16	0	0	0	16	0	0	0	0	0	0	2	8	6	0	0	0	16	84	1.04619e-11	2.74102e-07	2.57384e-07	1.71421e-10
Glyma.18G192902	4	0	4	0	10	0	0	6	4	6	0	2	14	0	4	0	12	0	0	0	0	4	2	4	10	6	4	4	0	16	84	1.04619e-11	2.74102e-07	2.57384e-07	1.71421e-10
Glyma.18G227000	6	0	1	1	0	0	0	8	0	8	0	3	13	0	3	0	13	4	1	2	0	2	3	3	8	7	5	9	0	16	84	1.04619e-11	2.74102e-07	2.57384e-07	1.71421e-10
Glyma.19G064800	12	0	0	0	1	0	0	4	8	4	0	3	13	0	4	0	11	0	0	1	0	7	7	0	12	9	4	0	0	16	84	1.04619e-11	2.74102e-07	2.57384e-07	1.71421e-10
Glyma.04G039800	0	0	12	0	0	0	0	0	0	0	0	0	16	0	0	0	20	0	0	0	0	0	0	0	20	16	16	0	0	16	84	1.04619e-11	2.74102e-07	2.57384e-07	1.71421e-10
Glyma.15G167000	12	0	0	0	2	0	0	8	8	8	0	4	14	0	4	0	6	0	0	2	0	2	6	8	6	8	8	0	0	18	88	1.05347e-11	2.76009e-07	2.59164e-07	1.72506e-10
Glyma.08G355100	6	0	0	0	6	0	0	3	3	3	0	3	6	6	0	0	6	3	0	3	0	6	3	0	9	6	6	0	0	9	69	1.09322e-11	2.86424e-07	2.68867e-07	1.78235e-10
Glyma.16G166500	6	0	0	0	6	0	0	6	0	6	0	3	6	3	3	3	3	9	0	3	0	6	3	0	6	3	3	0	0	9	69	1.09322e-11	2.86424e-07	2.68867e-07	1.78235e-10
Glyma.18G137300	6	0	0	0	6	0	0	3	6	3	0	3	6	0	3	3	6	0	0	0	0	6	6	3	6	6	6	0	0	9	69	1.09322e-11	2.86424e-07	2.68867e-07	1.78235e-10
Glyma.18G161000	15	0	0	0	0	0	0	9	9	9	0	0	9	0	0	0	9	0	0	0	0	0	3	0	9	6	0	0	0	9	69	1.09322e-11	2.86424e-07	2.68867e-07	1.78235e-10
Glyma.02G141101	0	0	0	0	6	0	6	6	6	6	0	3	6	0	0	0	6	0	0	0	0	6	6	3	6	6	3	3	0	9	69	1.09322e-11	2.86424e-07	2.68867e-07	1.78235e-10
Glyma.03G036900	6	0	0	0	6	0	0	6	6	6	0	3	6	0	3	0	6	0	0	0	0	6	3	6	6	6	3	0	0	9	69	1.09322e-11	2.86424e-07	2.68867e-07	1.78235e-10
Glyma.06G205800	5	0	0	0	5	0	0	5	5	5	0	3	6	2	5	0	5	0	2	2	0	5	4	3	5	5	4	2	0	9	69	1.09322e-11	2.86424e-07	2.68867e-07	1.78235e-10
Glyma.01G089000	4	0	1	0	4	3	4	4	3	4	0	2	4	0	3	0	5	2	1	2	3	2	4	2	4	3	3	1	0	6	62	1.11361e-11	2.91765e-07	2.73836e-07	1.81108e-10
Glyma.11G179100	6	0	0	0	4	0	0	3	3	3	0	3	3	3	3	0	6	6	0	0	0	5	1	4	5	6	3	1	0	6	62	1.11361e-11	2.91765e-07	2.73836e-07	1.81108e-10
Glyma.15G127800	6	0	0	0	0	0	0	6	6	6	0	0	6	0	6	0	6	0	0	0	0	6	0	6	0	6	6	2	0	6	62	1.11361e-11	2.91765e-07	2.73836e-07	1.81108e-10
Glyma.18G171700	6	0	0	0	2	0	0	6	6	6	0	0	6	0	2	0	6	4	0	0	0	6	2	0	6	6	4	0	0	6	62	1.11361e-11	2.91765e-07	2.73836e-07	1.81108e-10
Glyma.04G084900	3	0	2	0	3	0	0	4	4	4	0	1	0	0	4	0	5	0	0	0	0	4	2	3	6	3	1	1	0	1	49	1.13521e-11	2.97426e-07	2.79127e-07	1.84393e-10
Glyma.06G048500	2	0	0	0	1	0	0	5	6	5	0	0	1	0	2	0	7	0	0	0	1	1	1	4	5	7	2	0	0	1	49	1.13521e-11	2.97426e-07	2.79127e-07	1.84393e-10
Glyma.18G032100	6	0	0	0	0	0	0	4	4	4	0	0	0	0	0	0	4	4	0	2	0	4	4	2	4	4	0	0	0	0	46	1.18253e-11	3.09823e-07	2.90737e-07	1.91841e-10
Glyma.03G039318	0	2	0	0	0	0	0	4	0	4	0	0	0	0	0	0	18	0	0	0	0	0	4	14	0	0	0	0	0	0	46	1.18253e-11	3.09823e-07	2.90737e-07	1.91841e-10
Glyma.18G123100	3	0	0	0	13	0	0	16	17	16	0	6	20	1	1	0	2	0	0	1	0	1	2	0	20	3	1	6	0	26	103	1.20616e-11	3.16014e-07	2.96534e-07	1.95553e-10
Glyma.18G123800	5	0	0	0	4	0	0	10	6	10	0	3	7	2	3	1	2	2	0	0	0	3	2	2	9	5	2	3	0	10	71	1.22038e-11	3.1974e-07	3.00007e-07	1.97615e-10
Glyma.U042300	8	0	0	0	4	0	0	9	7	9	0	3	7	0	2	0	7	1	0	2	0	3	1	0	8	5	4	1	0	10	71	1.22038e-11	3.1974e-07	3.00007e-07	1.97615e-10
Glyma.16G089400	7	0	0	0	4	0	0	5	7	5	0	0	7	0	2	0	6	0	0	2	0	3	5	0	6	5	4	3	0	7	64	1.33627e-11	3.50102e-07	3.28441e-07	2.15846e-10
Glyma.16G094500	7	0	0	0	4	0	0	5	21	5	0	0	7	0	2	0	6	0	0	0	0	2	2	0	5	3	2	0	0	7	64	1.33627e-11	3.50102e-07	3.28441e-07	2.15846e-10
Glyma.14G042600	0	0	0	0	0	0	0	11	10	11	0	0	11	1	9	0	1	2	0	0	0	0	2	3	10	0	9	4	0	11	73	1.33535e-11	3.49863e-07	3.28257e-07	2.15846e-10
Glyma.02G184700	5	0	0	0	2	0	3	7	8	7	0	3	4	0	0	0	3	0	0	0	0	5	1	3	6	8	5	1	0	7	64	1.33627e-11	3.50102e-07	3.28441e-07	2.15846e-10
Glyma.20G229100	7	0	0	0	14	0	0	7	7	7	0	14	42	0	14	0	7	0	0	0	0	42	7	14	14	7	7	0	0	56	154	1.35497e-11	3.55003e-07	3.33025e-07	2.18733e-10
Glyma.15G122100	3	0	3	0	0	0	0	3	3	3	0	0	3	0	6	0	6	0	0	0	0	6	6	3	3	3	3	3	0	3	54	1.42722e-11	3.73932e-07	3.50696e-07	2.29547e-10
Glyma.17G212200	10	0	0	0	2	0	0	9	3	9	0	0	3	0	2	0	3	0	0	1	0	1	1	0	9	3	1	0	0	3	54	1.42722e-11	3.73932e-07	3.50696e-07	2.29547e-10
Glyma.20G069800	6	0	0	0	3	0	0	0	6	0	0	0	3	0	3	0	9	0	0	3	0	6	3	3	9	3	0	0	0	3	54	1.42722e-11	3.73932e-07	3.50696e-07	2.29547e-10
Glyma.02G185400	3	0	0	0	6	0	2	7	6	7	0	1	2	0	0	0	2	0	0	0	0	5	1	0	4	7	4	0	0	3	54	1.42722e-11	3.73932e-07	3.50696e-07	2.29547e-10
Glyma.06G180700	3	0	0	0	3	0	0	3	3	3	0	0	3	0	0	0	18	0	0	6	0	3	0	0	3	3	3	3	0	3	54	1.42722e-11	3.73932e-07	3.50696e-07	2.29547e-10
Glyma.06G276100	6	0	0	0	6	0	0	0	6	0	0	0	3	0	0	0	0	0	0	0	0	0	6	0	9	9	6	6	0	3	54	1.42722e-11	3.73932e-07	3.50696e-07	2.29547e-10
Glyma.15G165700	9	0	0	0	0	0	0	9	9	9	0	3	9	0	3	0	0	0	0	3	0	9	6	0	6	9	3	0	0	12	75	1.43518e-11	3.76016e-07	3.52637e-07	2.30685e-10
Glyma.14G139100	4	0	0	0	3	0	0	4	4	4	0	0	5	0	2	0	6	0	0	2	0	4	3	0	15	4	3	0	1	5	59	1.47845e-11	3.87354e-07	3.63256e-07	2.37495e-10
Glyma.19G059100	9	3	2	1	1	0	0	1	2	1	4	2	7	0	5	0	8	0	0	5	0	7	3	4	7	7	6	5	0	13	77	1.51775e-11	3.97652e-07	3.72897e-07	2.43659e-10
Glyma.16G181100	6	0	0	0	3	0	0	18	3	18	0	3	18	0	15	0	3	0	0	0	0	18	0	3	3	3	0	0	0	21	93	1.54704e-11	4.05323e-07	3.8006e-07	2.48056e-10
Glyma.16G217800	6	0	6	0	6	0	0	6	12	6	0	12	9	0	3	3	6	3	0	0	0	6	6	6	6	6	6	0	0	21	93	1.54704e-11	4.05323e-07	3.8006e-07	2.48056e-10
Glyma.02G218400	8	0	0	0	4	0	0	8	8	8	0	0	8	2	2	0	2	0	0	0	0	6	4	4	2	2	2	4	0	8	66	1.55831e-11	4.08277e-07	3.82752e-07	2.49102e-10
Glyma.06G204400	6	0	2	0	6	0	0	4	6	4	0	4	4	0	4	0	6	0	0	4	0	4	2	4	6	4	4	0	0	8	66	1.55831e-11	4.08277e-07	3.82752e-07	2.49102e-10
Glyma.09G014900	6	0	2	0	2	0	0	6	6	6	0	2	6	0	4	0	8	0	0	2	0	6	4	0	6	4	2	2	0	8	66	1.55831e-11	4.08277e-07	3.82752e-07	2.49102e-10
Glyma.19G049900	6	0	0	0	0	0	0	2	8	2	0	2	6	2	6	0	6	0	0	0	0	0	8	4	10	6	6	0	0	8	66	1.55831e-11	4.08277e-07	3.82752e-07	2.49102e-10
Glyma.19G066700	12	0	0	0	0	0	0	0	8	0	0	0	8	0	4	0	8	0	0	2	0	4	4	0	8	8	6	2	0	8	66	1.55831e-11	4.08277e-07	3.82752e-07	2.49102e-10
Glyma.06G325700	5	1	1	2	4	0	0	7	6	7	3	3	8	2	3	0	8	2	1	2	0	6	3	1	6	4	4	2	2	14	79	1.58184e-11	4.14442e-07	3.88516e-07	2.52709e-10
Glyma.07G166850	10	0	0	0	6	0	0	13	5	13	0	0	18	0	2	0	9	0	0	1	0	4	4	0	12	6	2	0	0	18	87	1.6539e-11	4.33322e-07	4.06198e-07	2.6406e-10
Glyma.01G036751	6	0	1	0	5	1	5	4	5	4	0	1	1	1	1	0	1	3	0	0	0	5	3	0	5	1	0	0	0	2	51	1.68886e-11	4.42482e-07	4.14734e-07	2.6915e-10
Glyma.02G237000	4	0	2	0	1	0	0	4	1	4	0	1	1	0	4	0	4	3	0	4	0	1	3	4	4	4	4	0	0	2	51	1.68886e-11	4.42482e-07	4.14734e-07	2.6915e-10
Glyma.18G130100	19	0	1	0	2	0	0	6	2	6	0	0	2	0	1	0	2	1	0	1	0	2	0	2	2	2	2	0	0	2	51	1.68886e-11	4.42482e-07	4.14734e-07	2.6915e-10
Glyma.02G178250	5	0	0	0	1	0	4	5	5	5	0	1	5	0	4	0	5	0	0	3	0	5	3	2	5	4	3	1	1	6	61	1.82575e-11	4.78347e-07	4.48332e-07	2.90789e-10
Glyma.09G071000	4	0	0	0	4	0	0	4	4	4	0	0	4	0	4	0	4	0	0	0	4	4	4	4	4	4	4	0	0	4	56	1.90439e-11	4.98952e-07	4.6732e-07	3.00212e-10
Glyma.09G177300	8	0	0	0	0	0	0	4	8	4	0	0	4	0	4	0	8	0	0	0	0	4	4	0	4	4	4	0	0	4	56	1.90439e-11	4.98952e-07	4.6732e-07	3.00212e-10
Glyma.09G190500	4	0	0	0	4	0	0	4	4	4	0	0	4	0	4	0	4	0	0	4	0	4	4	0	4	4	4	4	0	4	56	1.90439e-11	4.98952e-07	4.6732e-07	3.00212e-10
Glyma.10G045000	4	0	4	0	0	0	0	4	4	4	4	0	0	0	0	0	4	4	0	0	0	4	4	4	4	4	4	4	0	4	56	1.90439e-11	4.98952e-07	4.6732e-07	3.00212e-10
Glyma.13G308200	4	0	0	0	0	0	0	8	8	8	0	0	4	0	0	0	8	0	0	4	0	8	0	0	4	4	0	0	0	4	56	1.90439e-11	4.98952e-07	4.6732e-07	3.00212e-10
Glyma.14G161200	4	0	0	0	4	0	0	4	12	4	0	4	0	0	8	0	12	0	0	0	0	0	0	4	4	0	0	0	0	4	56	1.90439e-11	4.98952e-07	4.6732e-07	3.00212e-10
Glyma.15G154000	4	0	0	0	0	0	0	8	4	8	0	0	4	0	4	0	8	0	0	0	0	0	4	0	8	4	4	0	0	4	56	1.90439e-11	4.98952e-07	4.6732e-07	3.00212e-10
Glyma.15G220600	6	0	0	0	0	0	0	4	4	4	0	0	4	0	2	0	4	0	0	0	0	8	2	2	6	8	4	2	0	4	56	1.90439e-11	4.98952e-07	4.6732e-07	3.00212e-10
Glyma.15G263800	6	0	0	0	0	0	0	6	6	6	0	2	2	2	2	0	8	0	2	6	2	0	0	4	2	2	2	0	0	4	56	1.90439e-11	4.98952e-07	4.6732e-07	3.00212e-10
Glyma.18G058600	4	1	4	0	1	0	0	5	5	5	0	3	1	0	1	0	5	2	0	1	0	5	2	4	5	3	3	0	0	4	56	1.90439e-11	4.98952e-07	4.6732e-07	3.00212e-10
Glyma.19G026702	4	0	0	0	4	0	0	4	4	4	0	0	4	0	0	0	4	0	0	4	0	8	0	4	8	4	4	0	0	4	56	1.90439e-11	4.98952e-07	4.6732e-07	3.00212e-10
Glyma.09G083300	0	0	0	0	8	0	0	8	4	8	0	4	0	8	0	0	0	0	0	0	0	8	0	4	8	0	0	0	0	4	56	1.90439e-11	4.98952e-07	4.6732e-07	3.00212e-10
Glyma.01G064600	4	0	0	0	4	4	4	6	4	6	0	0	4	0	0	0	6	0	0	2	0	2	0	0	6	4	4	0	0	4	56	1.9044e-11	4.98952e-07	4.6732e-07	3.00212e-10
Glyma.01G107500	3	0	0	0	3	4	8	4	3	4	0	0	1	0	0	0	3	0	0	0	0	3	2	0	3	4	2	2	0	1	48	1.8899e-11	4.95153e-07	4.64064e-07	3.00212e-10
Glyma.03G135900	7	0	1	1	0	0	0	9	0	9	1	1	2	0	1	0	3	2	0	0	1	5	3	1	7	1	5	0	0	4	56	1.9044e-11	4.98952e-07	4.6732e-07	3.00212e-10
Glyma.03G262100	4	0	0	0	4	0	0	4	4	4	0	0	4	4	4	0	4	0	0	0	0	4	4	0	4	4	4	0	4	4	56	1.9044e-11	4.98952e-07	4.6732e-07	3.00212e-10
Glyma.05G109300	4	0	4	0	4	0	0	4	4	4	0	0	4	0	0	4	4	0	0	4	0	4	0	4	4	4	4	0	0	4	56	1.9044e-11	4.98952e-07	4.6732e-07	3.00212e-10
Glyma.01G156400	6	0	0	0	6	0	0	9	0	9	0	0	0	0	6	0	3	0	0	0	0	0	0	0	6	0	0	0	0	0	45	1.97034e-11	5.1623e-07	4.8301e-07	3.06005e-10
Glyma.01G177400	5	0	0	0	5	0	5	5	5	5	0	5	5	5	0	0	5	0	0	0	5	0	5	5	5	5	5	0	0	10	70	1.97034e-11	5.1623e-07	4.8301e-07	3.06005e-10
Glyma.01G194700	6	0	0	0	3	0	0	3	3	3	0	0	0	3	0	3	3	0	0	0	0	0	3	6	3	3	3	0	0	0	45	1.97034e-11	5.1623e-07	4.8301e-07	3.06005e-10
Glyma.03G032900	3	0	3	0	3	0	0	3	3	3	0	0	0	3	3	0	3	0	0	0	0	3	3	3	3	3	3	0	0	0	45	1.97034e-11	5.1623e-07	4.8301e-07	3.06005e-10
Glyma.05G189800	9	0	0	0	9	0	0	0	0	0	0	0	0	0	0	0	9	0	0	0	0	0	0	0	9	9	0	0	0	0	45	1.97034e-11	5.1623e-07	4.8301e-07	3.06005e-10
Glyma.06G147500	5	0	0	0	5	0	0	5	5	5	0	0	0	0	5	0	0	0	0	5	0	5	0	0	5	0	0	0	0	0	45	1.97034e-11	5.1623e-07	4.8301e-07	3.06005e-10
Glyma.06G162500	9	0	9	0	0	0	0	0	9	0	0	0	0	0	0	0	9	0	0	0	0	9	0	0	0	0	0	0	0	0	45	1.97034e-11	5.1623e-07	4.8301e-07	3.06005e-10
Glyma.06G294100	5	0	0	0	0	0	0	0	5	0	0	0	0	0	5	0	5	0	0	0	0	5	5	5	10	0	0	0	0	0	45	1.97034e-11	5.1623e-07	4.8301e-07	3.06005e-10
Glyma.07G087500	5	0	5	0	5	0	0	5	0	5	5	0	5	0	5	0	5	5	0	0	0	5	5	5	5	5	5	0	0	10	70	1.97034e-11	5.1623e-07	4.8301e-07	3.06005e-10
Glyma.13G049400	9	0	0	0	0	0	0	0	9	0	0	0	0	0	0	0	6	0	0	0	0	3	3	0	6	6	3	0	0	0	45	1.97034e-11	5.1623e-07	4.8301e-07	3.06005e-10
Glyma.13G135700	9	0	3	0	0	0	0	3	0	3	0	0	0	0	0	0	9	0	0	0	0	6	3	3	0	6	0	0	0	0	45	1.97034e-11	5.1623e-07	4.8301e-07	3.06005e-10
Glyma.13G200200	8	0	0	0	10	0	0	4	10	4	0	2	8	2	8	2	2	0	0	0	0	2	4	0	2	4	2	6	0	10	70	1.97034e-11	5.1623e-07	4.8301e-07	3.06005e-10
Glyma.15G107100	5	0	5	0	5	0	0	5	5	5	0	5	5	0	0	0	5	5	0	0	0	0	5	5	5	5	5	5	0	10	70	1.97034e-11	5.1623e-07	4.8301e-07	3.06005e-10
Glyma.15G175500	5	0	0	0	5	0	0	5	5	5	0	5	5	0	5	0	5	0	0	5	0	5	5	5	5	5	5	0	0	10	70	1.97034e-11	5.1623e-07	4.8301e-07	3.06005e-10
Glyma.16G151900	6	0	2	0	6	0	0	4	4	4	0	2	8	0	6	2	6	0	0	2	0	6	4	2	6	6	4	0	0	10	70	1.97034e-11	5.1623e-07	4.8301e-07	3.06005e-10
Glyma.18G147700	4	0	2	0	6	0	0	2	6	2	0	2	8	2	4	0	6	2	0	4	0	6	4	4	6	6	4	0	0	10	70	1.97034e-11	5.1623e-07	4.8301e-07	3.06005e-10
Glyma.18G150300	8	0	1	0	7	0	0	2	10	2	0	0	10	0	3	0	7	0	0	1	0	4	2	1	8	9	3	2	0	10	70	1.97034e-11	5.1623e-07	4.8301e-07	3.06005e-10
Glyma.18G248900	5	0	0	0	0	0	0	5	0	5	0	0	0	0	5	0	0	0	0	0	0	5	5	0	5	5	5	0	0	0	45	1.97034e-11	5.1623e-07	4.8301e-07	3.06005e-10
Glyma.20G224300	6	0	3	0	6	0	0	0	0	0	0	0	0	0	0	0	0	3	0	3	6	6	6	0	6	0	0	0	0	0	45	1.97034e-11	5.1623e-07	4.8301e-07	3.06005e-10
Glyma.02G191500	0	0	0	0	10	0	0	10	10	10	0	0	10	0	0	0	0	0	0	0	0	10	0	10	0	10	0	0	0	10	70	1.97034e-11	5.1623e-07	4.8301e-07	3.06005e-10
Glyma.05G168802	0	0	0	0	5	0	0	5	5	5	0	5	5	5	5	0	5	5	0	0	0	0	5	5	5	5	5	5	0	10	70	1.97034e-11	5.1623e-07	4.8301e-07	3.06005e-10
Glyma.12G098200	0	0	0	0	5	0	0	5	5	5	0	5	5	5	5	0	5	5	0	0	0	5	5	5	5	5	0	5	0	10	70	1.97034e-11	5.1623e-07	4.8301e-07	3.06005e-10
Glyma.10G022600	0	0	0	0	0	0	0	9	9	9	0	0	0	0	0	0	9	0	0	0	0	0	0	0	9	0	0	0	0	0	45	1.97034e-11	5.1623e-07	4.8301e-07	3.06005e-10
Glyma.13G033000	0	0	0	0	0	0	0	9	9	9	0	0	0	0	0	0	0	0	0	0	0	0	0	3	6	3	3	3	0	0	45	1.97034e-11	5.1623e-07	4.8301e-07	3.06005e-10
Glyma.20G243800	0	0	0	0	0	0	0	9	0	9	0	0	0	0	0	0	0	9	9	0	0	9	0	0	0	0	0	0	0	0	45	1.97034e-11	5.1623e-07	4.8301e-07	3.06005e-10
Glyma.10G271100	6	0	0	0	1	0	0	6	6	6	0	1	6	0	5	0	6	0	0	5	0	0	5	5	7	4	1	0	0	7	63	2.18223e-11	5.71744e-07	5.34842e-07	3.3791e-10
Glyma.13G250500	7	0	0	0	0	0	0	7	7	7	0	0	7	0	7	0	7	0	0	0	0	0	0	0	7	7	7	0	0	7	63	2.18223e-11	5.71744e-07	5.34842e-07	3.3791e-10
Glyma.18G091100	7	0	0	0	7	0	0	0	7	0	0	0	7	0	7	7	7	0	0	0	0	0	0	0	7	7	7	0	0	7	63	2.18223e-11	5.71744e-07	5.34842e-07	3.3791e-10
Glyma.20G221000	7	0	0	0	7	0	0	7	7	7	0	0	7	0	0	0	0	0	0	0	0	7	0	0	7	7	7	0	0	7	63	2.18223e-11	5.71744e-07	5.34842e-07	3.3791e-10
Glyma.03G065900	7	0	0	0	5	0	0	6	7	6	0	0	7	0	1	0	6	0	0	0	0	4	5	1	7	4	3	1	0	7	63	2.18223e-11	5.71743e-07	5.34842e-07	3.3791e-10
Glyma.04G137600	8	0	0	0	2	0	0	6	8	6	0	2	10	0	4	0	12	2	0	0	0	4	6	4	8	2	2	0	0	12	74	2.2993e-11	6.02417e-07	5.63444e-07	3.55199e-10
Glyma.11G177401	10	0	0	0	1	0	0	9	8	9	0	0	12	0	2	0	13	0	0	2	0	1	5	0	9	3	2	0	0	12	74	2.2993e-11	6.02417e-07	5.63444e-07	3.55199e-10
Glyma.13G192600	8	0	0	0	0	0	0	6	6	6	0	6	6	4	6	0	6	0	0	0	2	4	6	6	6	6	2	0	0	12	74	2.2993e-11	6.02417e-07	5.63444e-07	3.55199e-10
Glyma.18G157200	10	0	0	0	7	0	0	0	8	0	0	1	11	1	6	0	9	0	0	2	0	5	5	0	7	7	6	1	0	12	74	2.2993e-11	6.02417e-07	5.63444e-07	3.55199e-10
Glyma.06G259100	0	0	0	0	6	0	0	0	5	0	0	3	0	3	5	0	6	0	0	4	0	5	5	4	0	6	4	0	0	3	53	2.36459e-11	6.19522e-07	5.79418e-07	3.65069e-10
Glyma.10G099100	6	0	0	0	2	0	0	5	6	5	0	0	5	0	2	0	8	0	0	0	0	2	5	2	11	2	2	0	0	5	58	2.43264e-11	6.37352e-07	5.95998e-07	3.74693e-10
Glyma.01G062400	8	0	0	0	0	5	5	6	5	6	0	0	5	0	3	0	6	0	0	2	0	2	2	0	5	2	1	0	0	5	58	2.43264e-11	6.37353e-07	5.95998e-07	3.74693e-10
Glyma.02G163400	5	0	0	0	5	0	5	6	5	6	0	0	5	0	1	0	4	0	0	1	0	3	3	0	7	5	2	0	0	5	58	2.43264e-11	6.37353e-07	5.95998e-07	3.74693e-10
Glyma.06G225700	4	0	1	0	4	0	0	7	6	7	0	1	4	0	3	0	4	0	0	1	0	4	3	1	7	4	2	0	0	5	58	2.43264e-11	6.37353e-07	5.95998e-07	3.74693e-10
Glyma.18G147200	5	0	0	0	10	0	0	5	15	5	0	0	20	0	0	0	5	0	0	0	0	5	0	5	15	15	5	0	0	20	90	2.4852e-11	6.51122e-07	6.08849e-07	3.82563e-10
Glyma.06G221700	10	0	0	0	4	0	0	10	6	10	0	0	14	0	4	0	9	0	0	0	0	3	4	2	8	6	2	0	0	14	78	2.51548e-11	6.59057e-07	6.16243e-07	3.86998e-10
Glyma.14G048000	10	0	0	0	10	0	0	10	5	10	0	0	15	0	5	0	10	0	0	0	0	0	0	0	10	10	0	0	0	15	80	2.57799e-11	6.75434e-07	6.31531e-07	3.96381e-10
Glyma.12G156800	14	2	0	0	4	0	0	12	8	12	0	0	18	0	0	0	14	0	0	0	0	2	2	0	8	6	2	0	0	18	86	2.59404e-11	6.79637e-07	6.35435e-07	3.98614e-10
Glyma.06G269200	8	0	0	0	4	0	0	0	2	0	0	2	0	0	8	0	2	0	0	0	0	8	0	2	6	6	4	0	0	2	50	2.80611e-11	7.35202e-07	6.87302e-07	4.30446e-10
Glyma.09G072500	2	2	0	0	0	0	0	6	6	6	0	0	2	0	0	0	6	2	0	0	0	2	6	0	6	4	2	0	0	2	50	2.80611e-11	7.35202e-07	6.87302e-07	4.30446e-10
Glyma.17G176200	8	0	2	0	0	0	0	4	4	4	0	2	0	0	2	0	10	0	0	0	0	2	0	4	2	4	2	2	0	2	50	2.80611e-11	7.35202e-07	6.87302e-07	4.30446e-10
Glyma.02G119600	3	0	0	0	3	0	6	6	6	6	0	0	6	0	0	0	6	0	0	0	0	6	0	0	6	6	6	0	0	6	60	2.99248e-11	7.84029e-07	7.32319e-07	4.53458e-10
Glyma.02G124200	2	0	0	0	2	0	6	6	6	6	0	0	6	0	2	0	6	2	0	0	0	6	0	0	6	4	4	2	0	6	60	2.99248e-11	7.84029e-07	7.32319e-07	4.53458e-10
Glyma.02G170366	6	0	2	0	4	0	4	6	4	6	0	0	6	0	0	0	6	0	0	0	0	4	2	2	6	4	4	0	0	6	60	2.99248e-11	7.84029e-07	7.32319e-07	4.53458e-10
Glyma.03G082300	6	0	0	0	3	0	0	6	6	6	0	0	6	0	0	0	6	0	0	0	0	3	6	0	6	6	6	0	0	6	60	2.99248e-11	7.84029e-07	7.32319e-07	4.53458e-10
Glyma.03G136600	6	0	0	0	6	0	0	6	6	6	0	6	0	6	0	0	6	0	0	0	0	6	0	0	6	0	6	0	0	6	60	2.99248e-11	7.84029e-07	7.32319e-07	4.53458e-10
Glyma.04G153100	4	0	0	0	4	0	0	6	10	6	0	0	6	0	2	0	4	0	0	2	0	2	4	0	10	4	2	0	0	6	60	2.99248e-11	7.84029e-07	7.32319e-07	4.53458e-10
Glyma.05G078300	6	0	0	0	6	0	0	6	6	6	0	0	6	0	0	0	6	0	0	0	0	6	0	0	6	6	0	6	0	6	60	2.99248e-11	7.84029e-07	7.32319e-07	4.53458e-10
Glyma.06G225400	6	0	0	0	6	0	0	6	6	6	0	0	6	0	0	0	6	0	0	0	0	6	6	0	6	6	0	0	0	6	60	2.99248e-11	7.84029e-07	7.32319e-07	4.53458e-10
Glyma.06G322600	3	0	0	0	3	0	0	3	3	3	0	3	3	0	3	0	3	3	0	3	3	6	3	0	6	6	3	6	0	6	60	2.99248e-11	7.84029e-07	7.32319e-07	4.53458e-10
Glyma.07G206200	4	0	2	0	4	0	0	4	4	4	0	2	4	4	4	0	4	0	0	2	0	4	4	4	4	4	4	0	0	6	60	2.99248e-11	7.84029e-07	7.32319e-07	4.53458e-10
Glyma.09G090200	6	0	0	0	4	0	0	6	8	6	0	0	6	0	2	0	8	0	0	0	0	4	0	4	8	4	0	0	0	6	60	2.99248e-11	7.84029e-07	7.32319e-07	4.53458e-10
Glyma.09G179800	8	0	0	0	2	0	0	6	6	6	0	0	6	0	2	0	6	0	0	2	0	4	2	2	6	6	2	0	0	6	60	2.99248e-11	7.84029e-07	7.32319e-07	4.53458e-10
Glyma.11G206700	6	0	0	0	6	0	0	6	3	6	0	0	6	3	3	0	6	0	0	3	0	3	3	0	6	6	0	0	0	6	60	2.99248e-11	7.84029e-07	7.32319e-07	4.53458e-10
Glyma.13G330100	4	0	0	0	4	0	0	4	4	4	0	0	6	0	4	0	4	2	0	2	0	4	4	4	4	4	4	4	0	6	60	2.99248e-11	7.84029e-07	7.32319e-07	4.53458e-10
Glyma.15G120100	6	0	0	0	0	0	0	6	6	6	0	0	6	0	2	0	8	2	0	2	0	2	2	2	6	6	2	2	0	6	60	2.99248e-11	7.84029e-07	7.32319e-07	4.53458e-10
Glyma.15G148800	6	0	0	0	0	0	0	6	0	6	0	0	6	0	6	0	6	0	0	0	0	6	6	0	6	6	6	0	0	6	60	2.99248e-11	7.84029e-07	7.32319e-07	4.53458e-10
Glyma.15G234700	3	0	0	0	4	0	0	4	5	4	0	0	6	0	5	0	9	1	0	0	0	9	1	4	6	2	1	2	0	6	60	2.99248e-11	7.84029e-07	7.32319e-07	4.53458e-10
Glyma.16G111200	3	0	0	0	6	0	0	0	3	0	0	0	6	0	6	0	6	6	0	3	0	0	3	0	9	6	3	6	0	6	60	2.99248e-11	7.84029e-07	7.32319e-07	4.53458e-10
Glyma.16G143100	6	0	0	0	3	0	0	3	3	3	0	0	6	0	3	0	3	0	0	0	0	0	6	3	6	9	6	6	0	6	60	2.99248e-11	7.84029e-07	7.32319e-07	4.53458e-10
Glyma.18G133202	6	0	0	0	6	0	0	2	14	2	0	0	6	0	0	0	10	0	0	0	0	2	2	0	6	6	4	0	0	6	60	2.99248e-11	7.84029e-07	7.32319e-07	4.53458e-10
Glyma.15G191600	0	0	0	0	6	0	0	0	6	0	0	0	6	0	6	0	6	6	6	0	0	6	0	6	0	6	6	0	0	6	60	2.99248e-11	7.84029e-07	7.32319e-07	4.53458e-10
Glyma.01G128750	1	0	0	0	1	0	5	6	5	6	0	0	1	1	0	0	6	0	0	0	0	6	2	1	1	3	3	0	0	1	47	3.14689e-11	8.24485e-07	7.70075e-07	4.76581e-10
Glyma.10G109200	20	0	0	0	0	0	0	0	8	0	0	0	0	0	0	0	0	0	0	0	0	0	0	0	16	0	0	0	0	0	44	3.28376e-11	8.60345e-07	8.03175e-07	4.93883e-10
Glyma.12G020700	4	0	0	0	4	0	0	4	0	4	0	0	0	0	0	0	4	0	0	0	0	4	4	0	8	4	4	0	0	0	44	3.28376e-11	8.60345e-07	8.03175e-07	4.93883e-10
Glyma.13G133300	4	0	4	0	0	0	0	4	0	4	0	0	0	0	0	0	4	4	0	2	2	4	2	2	4	0	4	0	0	0	44	3.28376e-11	8.60345e-07	8.03175e-07	4.93883e-10
Glyma.16G219400	4	0	0	0	0	0	0	4	4	4	0	0	0	0	0	0	6	0	0	0	0	4	4	2	4	4	2	2	0	0	44	3.28376e-11	8.60345e-07	8.03175e-07	4.93883e-10
Glyma.18G231200	6	0	2	0	0	0	0	4	0	4	0	0	0	0	2	0	4	0	0	0	0	0	4	4	4	6	4	0	0	0	44	3.28376e-11	8.60345e-07	8.03175e-07	4.93883e-10
Glyma.18G236300	4	0	2	0	0	0	0	4	0	4	0	0	0	0	4	0	2	2	0	4	0	4	0	2	6	2	2	2	0	0	44	3.28376e-11	8.60345e-07	8.03175e-07	4.93883e-10
Glyma.19G114000	4	0	4	0	0	0	0	2	0	2	0	0	0	0	0	0	6	0	0	0	0	6	4	0	4	6	4	2	0	0	44	3.28376e-11	8.60345e-07	8.03175e-07	4.93883e-10
Glyma.07G007300	0	0	0	0	0	0	0	4	4	4	0	0	0	0	0	0	4	2	0	2	0	0	4	4	4	4	4	4	0	0	44	3.28376e-11	8.60345e-07	8.03175e-07	4.93883e-10
Glyma.14G096800	0	0	0	0	0	0	0	8	8	8	0	0	0	0	0	0	8	0	0	0	0	12	0	0	0	0	0	0	0	0	44	3.28376e-11	8.60345e-07	8.03175e-07	4.93883e-10
Glyma.02G071600	4	0	0	0	0	0	4	0	8	0	0	0	0	0	0	0	8	0	0	0	0	0	4	0	4	8	4	0	0	0	44	3.28376e-11	8.60345e-07	8.03175e-07	4.93883e-10
Glyma.04G243900	4	0	4	0	4	0	0	0	4	0	0	0	0	0	0	0	4	0	0	0	4	0	4	4	4	4	4	0	0	0	44	3.28376e-11	8.60345e-07	8.03175e-07	4.93883e-10
Glyma.06G135200	4	0	0	0	4	0	0	4	4	4	0	0	0	4	4	0	4	0	0	0	0	4	4	0	4	0	0	0	0	0	44	3.28376e-11	8.60345e-07	8.03175e-07	4.93883e-10
Glyma.15G217400	6	0	0	0	5	0	0	5	9	5	0	0	11	0	3	0	10	0	0	0	0	6	1	0	4	9	7	1	0	11	71	3.45159e-11	9.04315e-07	8.44189e-07	5.18827e-10
Glyma.17G192000	9	0	1	0	0	0	0	8	2	8	0	0	3	0	0	0	3	0	0	1	0	2	0	0	6	8	4	0	0	3	52	3.91766e-11	1.02643e-06	9.58142e-07	5.88548e-10
Glyma.03G085500	12	0	0	0	6	0	0	6	5	6	0	1	18	2	4	0	14	1	0	0	0	2	6	0	9	7	5	2	0	19	87	3.98205e-11	1.0433e-06	9.73851e-07	5.97878e-10
Glyma.14G138450	5	0	0	0	3	0	0	5	4	5	0	0	5	2	3	0	4	0	0	2	0	3	4	0	10	3	4	0	0	5	57	4.00192e-11	1.0485e-06	9.78669e-07	6.00517e-10
Glyma.10G099400	13	0	0	0	4	0	0	6	6	6	0	0	15	0	0	0	14	0	0	0	0	3	6	2	10	5	3	1	0	15	79	4.08129e-11	1.0693e-06	9.98039e-07	6.12077e-10
Glyma.07G207300	4	0	4	0	4	0	0	4	4	4	0	4	4	2	4	0	4	0	0	4	0	4	4	4	4	4	4	2	0	8	64	4.12093e-11	1.07968e-06	1.00715e-06	6.13108e-10
Glyma.08G032900	4	0	4	0	4	0	0	4	4	4	0	4	4	4	4	0	4	0	0	4	0	4	4	4	4	4	4	0	0	8	64	4.12093e-11	1.07968e-06	1.00715e-06	6.13108e-10
Glyma.10G037900	4	0	4	0	4	0	0	4	4	4	0	4	4	0	4	0	4	4	0	0	0	4	4	4	4	4	4	4	0	8	64	4.12093e-11	1.07968e-06	1.00715e-06	6.13108e-10
Glyma.13G004800	6	0	0	0	4	0	0	2	10	2	0	0	8	0	2	0	2	0	0	4	0	4	2	2	10	8	6	0	0	8	64	4.12093e-11	1.07968e-06	1.00715e-06	6.13108e-10
Glyma.13G362550	8	0	0	0	0	0	0	8	8	8	0	0	8	0	4	0	8	0	0	0	0	4	0	0	8	8	0	0	0	8	64	4.12093e-11	1.07968e-06	1.00715e-06	6.13108e-10
Glyma.16G107900	8	0	0	0	4	0	0	4	4	4	0	0	8	4	4	0	8	0	0	0	0	4	0	0	8	4	8	0	0	8	64	4.12093e-11	1.07968e-06	1.00715e-06	6.13108e-10
Glyma.18G266100	4	0	0	0	4	0	0	4	0	4	0	4	4	4	0	0	8	4	0	0	0	0	4	0	4	12	8	4	0	8	64	4.12093e-11	1.07968e-06	1.00715e-06	6.13108e-10
Glyma.19G168500	8	0	0	0	0	0	0	8	8	8	0	8	0	8	0	0	8	0	0	0	0	0	0	8	8	0	0	0	0	8	64	4.12093e-11	1.07968e-06	1.00715e-06	6.13108e-10
Glyma.17G217300	0	0	0	0	0	0	0	0	0	0	0	8	0	8	0	0	0	0	0	0	0	20	4	0	0	12	16	4	0	8	64	4.12093e-11	1.07968e-06	1.00715e-06	6.13108e-10
Glyma.02G111600	4	0	0	0	0	0	0	12	0	12	0	8	0	4	0	0	0	0	0	0	0	0	8	12	12	0	0	0	0	8	64	4.12093e-11	1.07968e-06	1.00715e-06	6.13108e-10
Glyma.02G234600	6	0	0	2	4	0	0	6	2	6	0	4	4	2	6	0	6	2	0	2	0	2	2	2	6	6	2	0	0	8	64	4.12093e-11	1.07968e-06	1.00715e-06	6.13108e-10
Glyma.03G061100	4	0	1	0	3	0	0	7	7	7	0	1	7	0	2	0	8	1	0	0	0	4	1	1	7	6	4	1	0	8	64	4.12093e-11	1.07968e-06	1.00715e-06	6.13108e-10
Glyma.07G123300	4	0	0	0	12	0	0	0	4	0	0	0	8	4	0	0	12	0	0	4	0	0	12	0	4	4	4	0	0	8	64	4.12093e-11	1.07968e-06	1.00715e-06	6.13108e-10
Glyma.07G153100	8	0	0	0	4	0	0	8	8	8	0	0	8	0	4	0	8	0	0	4	0	0	0	4	0	4	0	4	0	8	64	4.12093e-11	1.07968e-06	1.00715e-06	6.13108e-10
Glyma.03G067200	6	0	0	0	5	0	0	6	6	6	0	2	7	0	3	0	8	0	0	1	0	4	5	1	6	5	4	0	0	9	66	4.64808e-11	1.2178e-06	1.13576e-06	6.8958e-10
Glyma.07G179400	7	0	1	0	3	0	0	8	8	8	1	0	8	0	2	0	8	0	0	0	0	2	2	0	8	7	2	0	0	9	66	4.64808e-11	1.2178e-06	1.13576e-06	6.8958e-10
Glyma.13G052900	9	0	0	0	6	0	0	0	6	0	0	3	6	0	0	0	12	6	0	0	0	6	3	3	9	0	0	6	0	9	66	4.64808e-11	1.2178e-06	1.13576e-06	6.8958e-10
Glyma.17G170400	9	0	3	0	6	0	0	3	6	3	0	3	6	0	3	0	9	0	0	3	0	6	3	3	3	3	3	0	0	9	66	4.64808e-11	1.2178e-06	1.13576e-06	6.8958e-10
Glyma.17G180100	6	0	0	0	3	0	0	6	3	6	0	3	6	0	3	0	12	0	0	0	0	9	3	3	6	3	3	0	0	9	66	4.64808e-11	1.2178e-06	1.13576e-06	6.8958e-10
Glyma.01G097700	3	0	0	0	2	1	5	2	4	2	0	0	2	0	1	0	7	0	0	1	0	1	2	1	6	6	5	0	0	2	49	4.66301e-11	1.22171e-06	1.13931e-06	6.91012e-10
Glyma.03G033800	2	0	0	0	6	0	0	6	1	6	0	2	0	0	1	0	6	0	0	2	0	4	0	1	6	4	3	1	0	2	49	4.66301e-11	1.22171e-06	1.13931e-06	6.91012e-10
Glyma.18G092000	2	0	0	0	3	0	0	5	5	5	0	1	5	0	3	0	6	1	0	4	0	4	4	3	5	5	4	0	0	6	59	4.90336e-11	1.28468e-06	1.19799e-06	7.26219e-10
Glyma.15G169000	12	0	0	0	6	0	0	12	6	12	0	6	18	0	0	0	6	0	0	0	0	6	0	0	18	6	6	6	0	24	96	4.94207e-11	1.29482e-06	1.2074e-06	7.31538e-10
Glyma.02G164164	0	0	2	0	4	0	6	6	7	6	0	0	10	0	4	0	13	0	0	1	0	4	5	0	2	6	2	0	0	10	68	5.12678e-11	1.34322e-06	1.25247e-06	7.58451e-10
Glyma.13G088400	4	0	2	0	4	0	0	4	4	4	0	0	4	0	4	0	4	0	0	4	0	4	2	2	4	4	4	0	0	4	54	5.19207e-11	1.36032e-06	1.26785e-06	7.63368e-10
Glyma.15G274600	4	0	2	0	4	0	0	4	4	4	0	0	4	0	4	0	4	2	0	0	0	4	2	4	4	4	4	0	0	4	54	5.19207e-11	1.36032e-06	1.26785e-06	7.63368e-10
Glyma.16G076600	2	0	0	0	4	0	0	6	6	6	0	2	2	0	4	0	4	2	0	2	0	4	2	0	4	4	4	0	0	4	54	5.19207e-11	1.36032e-06	1.26785e-06	7.63368e-10
Glyma.17G232285	6	0	0	0	2	0	0	4	2	4	0	2	2	4	2	0	4	2	0	0	0	2	4	4	4	4	4	2	0	4	54	5.19207e-11	1.36032e-06	1.26785e-06	7.63368e-10
Glyma.18G195400	6	0	4	0	4	0	0	4	4	4	0	0	4	0	4	2	4	0	0	0	0	4	6	0	4	2	0	2	0	4	54	5.19207e-11	1.36032e-06	1.26785e-06	7.63368e-10
Glyma.18G241000	2	0	0	0	0	0	0	2	4	2	0	4	0	0	2	0	6	6	0	4	0	4	2	6	2	6	6	0	0	4	54	5.19207e-11	1.36032e-06	1.26785e-06	7.63368e-10
Glyma.19G106700	4	0	0	0	2	0	0	4	4	4	0	0	4	0	4	0	4	0	0	0	0	6	4	2	8	4	4	0	0	4	54	5.19207e-11	1.36032e-06	1.26785e-06	7.63368e-10
Glyma.20G029700	4	0	0	0	2	0	0	4	4	4	0	0	4	0	2	0	6	0	0	2	0	4	4	4	4	6	4	0	0	4	54	5.19207e-11	1.36032e-06	1.26785e-06	7.63368e-10
Glyma.08G198800	0	0	0	0	0	0	0	10	6	10	0	4	0	0	4	0	0	0	0	0	0	0	0	4	8	8	4	0	0	4	54	5.19207e-11	1.36032e-06	1.26785e-06	7.63368e-10
Glyma.07G014400	4	0	0	0	4	0	0	4	4	4	0	0	4	0	4	0	4	0	0	0	2	4	4	4	4	4	4	0	0	4	54	5.19207e-11	1.36032e-06	1.26785e-06	7.63368e-10
Glyma.07G157200	6	0	0	0	6	0	0	2	6	2	0	2	2	0	0	0	6	0	0	2	0	6	0	4	6	4	0	4	0	4	54	5.19207e-11	1.36032e-06	1.26785e-06	7.63368e-10
Glyma.01G123700	3	0	0	0	2	0	3	4	4	4	0	1	0	2	2	0	5	0	0	1	0	4	1	2	4	3	2	0	0	1	46	5.24097e-11	1.37313e-06	1.27974e-06	7.70126e-10
Glyma.06G255900	0	0	0	0	28	0	0	28	32	28	0	0	40	0	0	4	0	0	0	0	0	0	0	0	0	4	0	0	0	40	124	5.40617e-11	1.41642e-06	1.32002e-06	7.93955e-10
Glyma.17G214500	1	3	2	1	0	0	0	4	1	4	0	0	0	0	0	0	4	2	0	0	2	0	3	1	3	4	4	4	0	0	43	5.47399e-11	1.43418e-06	1.33653e-06	8.03465e-10
Glyma.02G118116	5	0	3	1	3	0	3	4	4	4	3	2	6	3	3	2	4	2	0	3	2	4	2	2	4	3	3	3	3	11	70	5.54351e-11	1.4524e-06	1.35339e-06	8.12759e-10
Glyma.09G076250	3	2	3	3	3	0	1	5	4	5	2	5	4	2	4	1	5	3	2	2	2	3	4	3	4	2	2	1	1	11	70	5.54351e-11	1.4524e-06	1.35339e-06	8.12759e-10
Glyma.04G137000	1	0	0	0	1	0	0	2	15	2	0	3	4	0	5	0	13	0	0	0	0	2	7	2	9	1	1	0	0	7	61	5.81327e-11	1.52308e-06	1.41908e-06	8.50881e-10
Glyma.20G062300	7	0	0	0	3	0	0	7	6	7	0	0	7	0	1	0	8	0	0	0	0	3	4	0	6	8	1	0	0	7	61	5.81327e-11	1.52308e-06	1.41908e-06	8.50881e-10
Glyma.20G064100	7	0	1	0	2	0	0	5	5	5	0	1	6	0	1	0	7	1	0	2	0	5	5	1	6	5	2	1	0	7	61	5.81327e-11	1.52308e-06	1.41908e-06	8.50881e-10
Glyma.06G259400	8	0	0	0	4	0	0	12	4	12	0	0	12	0	4	0	8	0	0	0	0	8	4	0	8	0	0	0	0	12	72	5.88867e-11	1.54283e-06	1.43695e-06	8.57605e-10
Glyma.09G115800	9	0	0	0	0	0	0	15	6	15	0	0	12	0	0	0	12	0	0	0	0	0	3	0	6	6	0	0	0	12	72	5.88867e-11	1.54283e-06	1.43695e-06	8.57605e-10
Glyma.12G214600	4	0	4	0	4	0	0	4	4	4	0	4	8	0	8	0	4	4	0	4	4	4	4	4	4	4	4	0	0	12	72	5.88867e-11	1.54283e-06	1.43695e-06	8.57605e-10
Glyma.14G128300	6	0	0	0	6	0	0	6	6	6	0	6	6	0	6	0	6	0	0	6	0	0	6	0	6	6	6	0	0	12	72	5.88867e-11	1.54283e-06	1.43695e-06	8.57605e-10
Glyma.15G013100	6	0	0	0	0	0	0	6	6	6	0	6	6	0	6	0	0	0	6	0	0	6	6	6	6	6	6	0	0	12	72	5.88867e-11	1.54283e-06	1.43695e-06	8.57605e-10
Glyma.16G163200	12	0	0	0	6	0	0	0	0	0	0	6	6	0	0	0	0	0	0	12	0	6	12	0	12	0	0	12	0	12	72	5.88867e-11	1.54283e-06	1.43695e-06	8.57605e-10
Glyma.20G192700	4	0	4	0	8	0	0	4	4	4	0	4	8	0	4	0	4	4	0	0	0	8	4	4	8	4	4	0	0	12	72	5.88867e-11	1.54283e-06	1.43695e-06	8.57605e-10
Glyma.02G033500	0	0	0	0	12	0	0	12	12	12	0	0	12	0	12	0	0	0	0	0	0	0	0	12	0	0	0	0	0	12	72	5.88867e-11	1.54283e-06	1.43695e-06	8.57605e-10
Glyma.16G208400	0	0	0	0	0	0	0	12	0	12	0	0	12	12	0	0	0	0	0	0	0	12	0	0	0	0	24	0	0	12	72	5.88867e-11	1.54283e-06	1.43695e-06	8.57605e-10
Glyma.12G138900	4	0	0	0	8	0	0	0	12	0	0	8	12	0	12	0	16	0	0	4	0	8	4	0	8	4	4	4	0	20	88	6.01747e-11	1.57658e-06	1.46832e-06	8.75876e-10
Glyma.08G265400	10	0	0	0	0	0	0	14	6	14	0	0	14	0	0	0	12	0	0	0	0	8	0	0	8	4	0	0	0	14	76	6.34508e-11	1.66241e-06	1.54801e-06	9.21515e-10
Glyma.15G193100	6	0	0	0	8	0	0	2	8	2	0	6	8	6	6	0	6	2	0	2	0	8	2	6	4	4	4	0	0	14	76	6.34508e-11	1.66241e-06	1.54801e-06	9.21515e-10
Glyma.15G248500	5	0	1	3	5	0	0	5	5	5	4	1	9	2	4	2	6	5	1	2	0	4	3	6	4	4	3	1	0	14	76	6.34508e-11	1.66241e-06	1.54801e-06	9.21515e-10
Glyma.18G109100	8	0	4	0	6	0	0	2	8	2	2	4	8	2	6	0	2	0	0	4	0	2	4	6	8	6	6	0	0	14	76	6.34508e-11	1.66241e-06	1.54801e-06	9.21515e-10
Glyma.09G111700	3	0	0	0	3	0	0	9	0	9	0	0	3	3	3	0	3	0	0	3	0	3	3	0	6	3	0	0	0	3	51	6.4909e-11	1.70062e-06	1.58268e-06	9.35432e-10
Glyma.12G054200	3	0	0	0	6	0	0	3	3	3	0	0	3	0	0	0	9	0	0	6	0	6	0	0	9	3	0	0	0	3	51	6.4909e-11	1.70062e-06	1.58268e-06	9.35432e-10
Glyma.14G119800	3	0	0	1	1	0	0	2	9	2	0	1	2	0	5	0	15	1	0	0	0	2	2	2	3	3	0	0	0	3	51	6.4909e-11	1.70062e-06	1.58268e-06	9.35432e-10
Glyma.16G067800	6	0	0	0	6	0	0	6	6	6	0	3	0	0	6	0	0	0	0	0	0	6	0	3	3	3	0	0	0	3	51	6.4909e-11	1.70062e-06	1.58268e-06	9.35432e-10
Glyma.17G245000	3	0	0	0	3	0	0	6	3	6	0	3	0	0	0	0	6	0	0	0	0	6	3	3	3	3	3	3	0	3	51	6.4909e-11	1.70062e-06	1.58268e-06	9.35432e-10
Glyma.18G164900	3	0	0	0	0	0	0	12	6	12	0	0	3	0	0	0	6	0	0	0	0	0	3	0	6	3	0	0	0	3	51	6.4909e-11	1.70062e-06	1.58268e-06	9.35432e-10
Glyma.18G245600	6	0	3	0	0	0	0	6	0	6	0	3	0	0	6	0	0	0	0	0	0	0	6	0	0	6	6	6	0	3	51	6.4909e-11	1.70062e-06	1.58268e-06	9.35432e-10
Glyma.20G189200	3	0	0	0	3	0	0	3	3	3	0	0	3	3	3	0	3	3	0	3	0	3	3	3	3	3	3	3	0	3	51	6.4909e-11	1.70062e-06	1.58268e-06	9.35432e-10
Glyma.07G083100	0	0	0	0	0	0	0	16	0	16	0	0	16	0	16	0	0	0	0	0	0	16	0	16	0	0	0	0	0	16	80	6.4909e-11	1.70062e-06	1.58268e-06	9.35432e-10
Glyma.13G033300	0	0	0	0	0	0	0	5	6	5	1	2	0	2	0	0	0	2	1	0	1	5	3	3	5	5	5	3	0	3	51	6.4909e-11	1.70062e-06	1.58268e-06	9.35432e-10
Glyma.02G098000	13	0	2	0	2	0	2	2	2	2	0	1	2	0	2	0	2	2	0	7	0	2	3	2	2	2	2	0	0	3	51	6.4909e-11	1.70062e-06	1.58268e-06	9.35432e-10
Glyma.02G186000	7	0	0	0	3	0	6	6	7	6	0	1	2	0	0	0	0	0	0	0	0	4	1	0	6	4	1	0	0	3	51	6.4909e-11	1.70062e-06	1.58268e-06	9.35432e-10
Glyma.04G147000	2	0	1	0	1	0	0	2	12	2	0	0	3	0	5	0	8	0	0	1	0	2	3	0	9	2	1	0	0	3	51	6.4909e-11	1.70062e-06	1.58268e-06	9.35432e-10
Glyma.07G121500	3	0	0	0	3	0	0	9	6	9	0	9	6	0	6	0	18	0	0	6	0	3	0	3	9	3	0	0	0	15	78	6.45532e-11	1.69129e-06	1.57484e-06	9.35432e-10
Glyma.14G133400	6	0	0	0	3	0	0	6	6	6	0	0	5	0	5	0	7	0	0	1	0	4	1	0	6	5	0	0	0	5	56	6.5822e-11	1.72454e-06	1.60474e-06	9.47027e-10
Glyma.18G168900	2	0	0	0	2	0	0	7	3	7	0	1	4	0	2	0	5	0	0	2	0	3	3	5	5	5	5	0	0	5	56	6.5822e-11	1.72454e-06	1.60474e-06	9.47027e-10
Glyma.07G173550	6	0	0	0	5	0	0	4	10	4	0	1	4	0	2	0	8	1	0	0	0	3	1	2	6	3	1	0	0	5	56	6.5822e-11	1.72454e-06	1.60474e-06	9.47027e-10
Glyma.15G231700	9	0	2	0	4	0	0	6	4	6	0	3	5	3	5	0	0	0	0	3	0	4	2	2	8	3	2	0	0	8	63	6.69662e-11	1.75452e-06	1.6325e-06	9.62433e-10
Glyma.03G073722	6	0	1	0	6	0	0	5	5	5	0	3	5	1	5	0	5	0	0	1	0	5	3	1	5	5	4	0	0	8	63	6.69662e-11	1.75452e-06	1.6325e-06	9.62433e-10
Glyma.18G156033	7	0	0	0	6	0	0	0	9	0	0	0	9	0	2	0	7	0	0	0	0	6	7	0	9	8	4	0	0	9	65	7.5217e-11	1.97068e-06	1.83356e-06	1.08042e-09
Glyma.01G059900	6	0	0	0	0	2	10	4	4	4	0	0	2	0	2	0	2	0	0	0	0	2	2	2	2	4	2	0	0	2	48	7.7496e-11	2.0304e-06	1.88865e-06	1.10951e-09
Glyma.06G286700	3	0	0	0	1	0	0	3	5	3	0	1	1	0	2	0	5	1	0	0	0	5	4	3	5	3	3	2	0	2	48	7.7496e-11	2.0304e-06	1.88865e-06	1.10951e-09
Glyma.08G275250	4	0	0	0	2	0	0	10	2	10	0	0	2	0	6	0	2	0	0	0	0	2	2	2	2	2	2	0	0	2	48	7.7496e-11	2.0304e-06	1.88866e-06	1.10951e-09
Glyma.08G318600	4	0	2	0	0	0	0	2	0	2	0	2	0	0	0	0	4	2	2	4	4	4	4	0	4	4	4	2	0	2	48	7.7496e-11	2.0304e-06	1.88866e-06	1.10951e-09
Glyma.14G202300	2	0	2	0	2	0	0	2	2	2	0	0	2	2	2	2	4	2	2	2	2	2	4	2	4	2	2	2	0	2	48	7.7496e-11	2.0304e-06	1.88866e-06	1.10951e-09
Glyma.17G194400	8	0	1	0	1	0	0	5	2	5	0	0	2	0	1	0	7	0	0	0	0	5	3	1	4	4	1	0	0	2	48	7.7496e-11	2.0304e-06	1.88866e-06	1.10951e-09
Glyma.11G166546	4	0	0	0	4	0	0	6	4	6	0	2	4	0	0	0	6	0	0	0	0	4	6	2	4	4	4	4	0	6	58	8.032e-11	2.10438e-06	1.95708e-06	1.1468e-09
Glyma.14G159500	4	0	0	0	1	0	0	5	9	5	0	0	6	0	1	0	14	0	0	1	0	4	2	0	4	5	2	1	0	6	58	8.032e-11	2.10438e-06	1.95708e-06	1.1468e-09
Glyma.17G215600	8	0	0	0	2	0	0	6	6	6	0	0	6	0	2	0	6	0	0	0	0	2	0	0	8	6	4	2	0	6	58	8.032e-11	2.10438e-06	1.95708e-06	1.1468e-09
Glyma.20G066900	4	0	2	0	0	0	0	6	4	6	0	2	4	0	0	0	10	2	0	2	0	2	2	0	6	6	4	2	0	6	58	8.032e-11	2.10438e-06	1.95708e-06	1.1468e-09
Glyma.03G037000	4	0	0	0	4	0	0	4	6	4	0	0	6	2	6	0	8	0	0	0	0	6	0	2	6	4	2	0	0	6	58	8.032e-11	2.10438e-06	1.95708e-06	1.1468e-09
Glyma.18G153100	8	0	0	0	6	0	0	3	7	3	0	1	9	0	1	0	8	0	0	0	0	6	4	0	8	7	6	0	0	10	67	8.26192e-11	2.16462e-06	2.01293e-06	1.17835e-09
Glyma.18G197700	7	0	0	0	5	0	0	8	9	8	0	2	8	1	3	0	8	0	0	0	0	7	1	1	5	1	1	2	0	10	67	8.26192e-11	2.16462e-06	2.01293e-06	1.17835e-09
Glyma.01G136200	2	0	0	0	2	0	5	7	4	7	0	2	2	1	3	0	6	0	0	1	0	2	2	1	6	3	1	0	0	4	53	8.57176e-11	2.2458e-06	2.08834e-06	1.22187e-09
Glyma.10G026151	4	0	0	0	0	0	0	4	4	4	0	1	0	0	0	0	4	0	0	2	0	4	4	3	4	4	4	0	0	1	45	8.73036e-11	2.28735e-06	2.12689e-06	1.2438e-09
Glyma.15G166900	7	0	0	0	1	0	0	6	7	6	0	4	7	3	4	0	1	0	0	0	0	4	5	5	7	7	6	0	0	11	69	8.89692e-11	2.33099e-06	2.16729e-06	1.26616e-09
Glyma.19G050600	6	0	2	0	0	0	0	0	6	0	0	5	6	3	5	0	6	0	0	5	4	0	5	5	6	6	6	4	0	11	69	8.89692e-11	2.33099e-06	2.16729e-06	1.26616e-09
Glyma.01G132200	6	0	0	0	3	0	1	5	6	5	0	0	0	2	2	0	6	1	0	0	0	1	0	0	2	1	1	0	0	0	42	9.12734e-11	2.39136e-06	2.22105e-06	1.28086e-09
Glyma.02G025200	6	0	0	0	0	0	0	0	6	0	0	0	0	0	0	0	6	0	0	0	0	6	6	6	6	0	0	0	0	0	42	9.12734e-11	2.39136e-06	2.22105e-06	1.28086e-09
Glyma.02G089900	8	0	2	0	0	0	2	0	2	0	0	0	0	2	0	0	2	0	0	4	2	2	2	0	8	6	0	0	0	0	42	9.12734e-11	2.39136e-06	2.22105e-06	1.28086e-09
Glyma.02G150300	9	0	0	0	0	0	9	3	3	3	0	0	0	0	0	0	0	0	0	0	0	0	0	0	0	9	6	0	0	0	42	9.12734e-11	2.39136e-06	2.22105e-06	1.28086e-09
Glyma.04G132200	2	0	0	0	0	0	0	0	8	0	0	0	0	0	4	0	8	0	0	0	0	0	4	2	6	2	6	0	0	0	42	9.12734e-11	2.39136e-06	2.22105e-06	1.28086e-09
Glyma.08G293100	21	0	0	0	0	0	0	0	0	0	0	0	0	0	0	0	0	0	0	0	0	21	0	0	0	0	0	0	0	0	42	9.12734e-11	2.39136e-06	2.22105e-06	1.28086e-09
Glyma.08G318100	6	0	6	0	0	0	0	0	0	0	0	0	0	0	0	0	0	0	0	0	0	6	0	0	6	6	6	6	0	0	42	9.12734e-11	2.39136e-06	2.22105e-06	1.28086e-09
Glyma.10G110800	2	0	0	0	0	0	0	2	28	2	0	0	0	0	0	0	0	0	0	0	0	2	0	2	4	0	0	0	0	0	42	9.12734e-11	2.39136e-06	2.22105e-06	1.28086e-09
Glyma.12G089300	7	0	0	0	0	0	0	7	0	7	0	0	0	0	7	0	7	7	0	0	0	0	0	0	0	0	0	0	0	0	42	9.12734e-11	2.39136e-06	2.22105e-06	1.28086e-09
Glyma.14G223100	14	0	0	0	0	0	0	0	14	0	0	0	0	0	0	0	0	0	0	14	0	0	0	0	0	0	0	0	0	0	42	9.12734e-11	2.39136e-06	2.22105e-06	1.28086e-09
Glyma.15G257200	8	0	0	0	0	0	0	4	6	4	0	0	0	0	0	0	6	0	0	0	0	0	0	0	0	8	6	0	0	0	42	9.12734e-11	2.39136e-06	2.22105e-06	1.28086e-09
Glyma.16G021000	4	0	0	0	4	0	0	3	4	3	0	0	0	0	0	0	4	0	0	0	0	4	1	2	4	4	4	1	0	0	42	9.12734e-11	2.39136e-06	2.22105e-06	1.28086e-09
Glyma.17G150900	3	0	3	0	3	0	0	3	3	3	0	0	0	0	0	0	3	3	0	0	0	3	3	3	3	3	3	0	0	0	42	9.12734e-11	2.39136e-06	2.22105e-06	1.28086e-09
Glyma.18G024700	6	0	0	0	0	0	0	0	12	0	0	0	0	6	0	0	6	0	0	0	0	0	0	0	6	6	0	0	0	0	42	9.12734e-11	2.39136e-06	2.22105e-06	1.28086e-09
Glyma.18G274100	8	0	2	0	0	0	0	0	0	0	0	0	0	0	0	0	8	2	0	0	0	0	0	0	6	8	6	2	0	0	42	9.12734e-11	2.39136e-06	2.22105e-06	1.28086e-09
Glyma.19G113600	6	0	6	0	0	0	0	0	0	0	0	0	0	0	0	0	3	0	0	0	0	3	3	0	9	6	3	3	0	0	42	9.12734e-11	2.39136e-06	2.22105e-06	1.28086e-09
Glyma.20G151400	9	0	0	0	0	0	0	0	12	0	0	0	0	0	0	0	3	0	0	3	0	0	3	9	3	0	0	0	0	0	42	9.12734e-11	2.39136e-06	2.22105e-06	1.28086e-09
Glyma.01G127200	0	0	1	0	0	0	2	8	7	8	0	0	0	2	0	0	7	0	0	0	0	0	2	1	3	0	0	1	0	0	42	9.12734e-11	2.39136e-06	2.22105e-06	1.28086e-09
Glyma.05G006700	0	0	0	0	12	0	0	0	0	0	0	0	0	0	0	0	6	0	0	6	0	6	0	0	6	6	0	0	0	0	42	9.12734e-11	2.39136e-06	2.22105e-06	1.28086e-09
Glyma.01G127700	0	0	0	0	0	0	0	8	8	8	0	0	0	4	0	0	14	0	0	0	0	0	0	0	0	0	0	0	0	0	42	9.12734e-11	2.39136e-06	2.22105e-06	1.28086e-09
Glyma.01G128200	0	0	0	0	0	0	0	9	9	9	0	0	0	0	0	0	6	3	0	0	0	0	0	0	3	3	0	0	0	0	42	9.12734e-11	2.39136e-06	2.22105e-06	1.28086e-09
Glyma.13G299500	0	0	0	0	0	0	0	8	4	8	0	0	0	0	0	0	4	0	0	0	0	0	2	2	8	6	0	0	0	0	42	9.12734e-11	2.39136e-06	2.22105e-06	1.28086e-09
Glyma.04G163100	0	0	0	0	0	0	0	0	0	0	0	0	0	0	0	0	21	0	0	0	0	0	0	0	0	0	0	21	0	0	42	9.12734e-11	2.39136e-06	2.22105e-06	1.28086e-09
Glyma.11G190900	0	0	0	0	0	0	0	0	0	0	0	0	0	0	0	0	28	0	0	0	0	0	0	0	0	0	14	0	0	0	42	9.12734e-11	2.39136e-06	2.22105e-06	1.28086e-09
Glyma.15G240500	0	0	0	0	0	0	0	0	0	0	0	0	0	0	0	0	24	8	0	0	0	10	0	0	0	0	0	0	0	0	42	9.12734e-11	2.39136e-06	2.22105e-06	1.28086e-09
Glyma.16G123600	0	0	0	0	0	0	0	0	0	0	0	0	0	0	0	0	36	6	0	0	0	0	0	0	0	0	0	0	0	0	42	9.12734e-11	2.39136e-06	2.22105e-06	1.28086e-09
Glyma.15G249250	5	0	1	0	4	0	0	5	5	5	0	2	5	1	2	0	3	1	0	3	0	5	3	3	5	5	4	0	0	7	60	9.48241e-11	2.48439e-06	2.30736e-06	1.32998e-09
Glyma.19G061200	10	0	0	0	0	0	0	2	12	2	0	1	12	0	4	0	12	0	0	0	0	2	2	0	10	12	4	1	0	13	73	9.80247e-11	2.56825e-06	2.38504e-06	1.37339e-09
Glyma.18G103400	0	0	0	0	10	0	0	18	15	18	0	4	9	0	0	0	1	0	1	1	0	0	0	0	9	0	0	0	0	13	73	9.80247e-11	2.56825e-06	2.38504e-06	1.37339e-09
Glyma.17G175700	4	0	1	0	3	0	0	4	4	4	0	0	3	0	2	0	8	0	0	1	0	3	4	0	5	5	2	0	0	3	50	1.07545e-10	2.81767e-06	2.61645e-06	1.50516e-09
Glyma.09G092650	0	0	0	0	8	0	0	8	8	8	0	2	1	0	0	0	0	0	0	0	0	7	1	0	7	2	1	0	0	3	50	1.07545e-10	2.81767e-06	2.61645e-06	1.50516e-09
Glyma.03G088000	5	0	0	0	0	0	0	10	10	10	0	0	5	0	0	0	5	0	0	0	0	5	0	0	5	0	5	0	0	5	55	1.08239e-10	2.83585e-06	2.63269e-06	1.51004e-09
Glyma.06G214050	5	0	0	0	5	0	0	5	5	5	0	1	4	0	4	0	5	0	0	1	0	4	3	2	1	5	5	0	0	5	55	1.08239e-10	2.83585e-06	2.63269e-06	1.51004e-09
Glyma.06G317700	5	0	0	0	5	0	0	0	5	0	0	5	0	5	0	0	5	5	0	0	0	0	5	5	5	5	5	0	0	5	55	1.08239e-10	2.83585e-06	2.63269e-06	1.51004e-09
Glyma.14G110900	1	1	0	0	1	0	0	9	7	9	0	0	5	1	5	0	9	0	0	0	0	1	1	2	6	1	1	0	0	5	55	1.08239e-10	2.83586e-06	2.63269e-06	1.51004e-09
Glyma.20G169600	5	0	0	0	0	0	0	5	5	5	0	5	0	0	5	0	0	5	0	0	0	0	5	5	0	5	5	5	0	5	55	1.08239e-10	2.83586e-06	2.63269e-06	1.51004e-09
Glyma.13G033900	0	0	0	0	0	0	0	8	7	8	2	3	0	3	0	0	0	2	1	0	1	4	1	3	6	6	3	2	0	5	55	1.08239e-10	2.83586e-06	2.63269e-06	1.51004e-09
Glyma.09G164700	8	0	0	0	0	0	0	4	6	4	0	0	8	0	2	0	10	0	0	0	0	0	0	0	10	12	4	2	0	8	62	1.08767e-10	2.8497e-06	2.64489e-06	1.51258e-09
Glyma.13G075200	6	0	0	0	4	0	0	4	4	4	0	2	6	4	2	0	6	2	0	4	0	4	4	4	4	4	2	0	0	8	62	1.08767e-10	2.8497e-06	2.64489e-06	1.51258e-09
Glyma.18G178900	7	0	0	0	6	0	0	6	7	6	0	0	8	0	0	0	9	0	0	0	0	1	3	0	7	7	3	0	0	8	62	1.08767e-10	2.8497e-06	2.64489e-06	1.51258e-09
Glyma.03G049500	5	0	1	0	4	0	0	3	5	3	0	3	5	2	4	0	6	1	1	4	1	5	4	2	4	3	4	0	0	8	62	1.08767e-10	2.8497e-06	2.64489e-06	1.51258e-09
Glyma.03G084600	8	0	0	0	7	0	0	5	5	5	0	0	8	0	2	0	7	0	0	1	0	3	4	0	7	8	0	0	0	8	62	1.08767e-10	2.8497e-06	2.64489e-06	1.51258e-09
Glyma.03G085400	12	0	0	0	4	0	0	6	4	6	0	0	8	0	2	0	10	0	0	0	0	4	0	0	8	4	2	0	0	8	62	1.08767e-10	2.8497e-06	2.64489e-06	1.51258e-09
Glyma.03G061852	28	0	0	0	8	0	0	16	16	16	0	0	56	0	4	0	16	0	0	0	0	4	8	0	24	8	0	0	0	56	148	1.18464e-10	3.10374e-06	2.88056e-06	1.64655e-09
Glyma.01G201600	1	0	1	5	1	0	4	4	2	4	0	1	1	0	6	0	3	5	0	0	0	0	5	3	1	1	0	1	0	2	47	1.28809e-10	3.37479e-06	3.13198e-06	1.78939e-09
Glyma.03G018102	5	0	0	0	2	0	0	10	5	10	0	0	6	0	2	0	4	0	0	0	0	1	4	3	8	3	0	0	0	6	57	1.31527e-10	3.446e-06	3.19715e-06	1.82039e-09
Glyma.04G099400	6	0	3	0	0	0	0	0	6	0	0	0	6	0	3	0	9	0	0	9	0	0	3	0	6	6	6	0	0	6	57	1.31527e-10	3.446e-06	3.19715e-06	1.82039e-09
Glyma.05G138100	6	0	3	0	3	0	0	6	6	6	0	3	3	0	0	0	3	0	0	0	0	3	3	0	6	6	6	0	0	6	57	1.31527e-10	3.446e-06	3.19715e-06	1.82039e-09
Glyma.12G224700	3	0	3	0	3	0	0	3	6	3	0	3	3	3	3	0	6	0	0	0	0	3	3	6	6	3	3	0	0	6	57	1.31527e-10	3.446e-06	3.19715e-06	1.82039e-09
Glyma.13G312900	3	0	0	0	3	0	0	3	9	3	0	3	3	0	3	0	6	0	3	3	0	3	0	6	3	3	3	3	0	6	57	1.31527e-10	3.446e-06	3.19715e-06	1.82039e-09
Glyma.14G192500	4	0	2	0	4	0	0	5	5	5	0	2	4	0	3	0	5	2	0	0	0	4	3	2	5	4	2	2	0	6	57	1.31527e-10	3.446e-06	3.19715e-06	1.82039e-09
Glyma.19G091100	6	0	0	0	0	0	0	6	6	6	0	0	6	0	3	0	6	0	0	0	0	3	6	3	9	3	0	0	0	6	57	1.31527e-10	3.446e-06	3.19715e-06	1.82039e-09
Glyma.02G191100	4	0	0	0	6	0	2	6	6	6	2	2	6	0	0	0	4	0	0	0	0	6	4	4	4	8	6	0	0	10	66	1.33053e-10	3.48599e-06	3.23359e-06	1.83667e-09
Glyma.09G203500	4	0	0	0	6	0	0	8	6	8	0	2	8	0	8	0	4	2	0	2	0	2	2	4	4	2	2	2	0	10	66	1.33053e-10	3.48599e-06	3.23359e-06	1.83667e-09
Glyma.14G152860	6	0	0	0	0	0	0	9	8	9	0	2	8	0	5	0	9	0	0	0	0	1	1	1	7	6	0	4	0	10	66	1.33053e-10	3.48599e-06	3.23359e-06	1.83667e-09
Glyma.19G067800	7	0	0	0	2	0	0	5	7	5	0	0	10	0	5	0	8	0	0	1	0	6	3	0	7	7	3	0	0	10	66	1.33053e-10	3.48599e-06	3.23359e-06	1.83667e-09
Glyma.15G232300	0	0	0	0	6	0	0	8	8	8	0	2	8	0	8	0	0	0	0	2	0	12	2	8	4	0	0	0	0	10	66	1.33053e-10	3.48599e-06	3.23359e-06	1.83667e-09
Glyma.01G224000	4	0	0	0	0	0	4	4	4	4	0	4	0	2	0	0	4	0	0	2	2	0	4	4	4	4	4	2	0	4	52	1.41499e-10	3.70728e-06	3.43589e-06	1.93188e-09
Glyma.02G235700	4	0	0	0	2	0	0	4	2	4	0	2	2	2	4	0	4	2	2	0	0	2	4	4	4	4	4	0	0	4	52	1.41499e-10	3.70728e-06	3.43589e-06	1.93188e-09
Glyma.02G257800	4	0	0	0	4	0	0	4	4	4	0	0	4	0	4	0	4	0	0	0	4	4	4	4	4	0	4	0	0	4	52	1.41499e-10	3.70728e-06	3.43589e-06	1.93188e-09
Glyma.02G258467	6	0	0	0	4	0	0	6	4	6	0	0	4	0	0	0	6	0	0	0	0	2	2	0	6	10	0	0	0	4	52	1.41499e-10	3.70728e-06	3.43589e-06	1.93188e-09
Glyma.02G279900	4	0	0	0	4	0	0	4	4	4	0	0	4	0	4	0	4	2	0	2	0	4	0	4	4	4	4	0	0	4	52	1.41499e-10	3.70728e-06	3.43589e-06	1.93188e-09
Glyma.03G128300	4	0	0	0	4	0	0	4	4	4	0	0	4	0	0	0	4	0	0	8	0	4	4	0	4	4	4	0	0	4	52	1.41499e-10	3.70728e-06	3.43589e-06	1.93188e-09
Glyma.04G075100	4	0	0	0	4	0	0	4	4	4	0	0	4	4	0	0	4	4	0	0	0	0	4	0	4	4	4	4	0	4	52	1.41499e-10	3.70728e-06	3.43589e-06	1.93188e-09
Glyma.04G139900	3	0	0	0	2	0	0	2	11	2	0	1	3	0	3	0	10	0	0	0	0	4	4	2	7	2	0	0	0	4	52	1.41499e-10	3.70728e-06	3.43589e-06	1.93188e-09
Glyma.04G166300	4	0	0	0	0	0	0	0	4	0	0	0	4	0	0	0	16	0	0	0	0	0	4	4	4	4	4	8	0	4	52	1.41499e-10	3.70728e-06	3.43589e-06	1.93188e-09
Glyma.06G190000	4	0	0	0	2	0	0	4	4	4	0	0	4	0	2	0	4	2	0	0	0	4	4	4	4	4	2	4	0	4	52	1.41499e-10	3.70728e-06	3.43589e-06	1.93188e-09
Glyma.07G016900	6	0	0	0	0	0	0	4	4	4	0	0	4	0	4	0	4	0	0	4	0	4	4	4	4	2	2	2	0	4	52	1.41499e-10	3.70728e-06	3.43589e-06	1.93188e-09
Glyma.11G022600	4	0	0	0	4	0	0	4	0	4	0	4	0	0	0	0	4	0	0	4	4	4	4	4	4	4	4	0	0	4	52	1.41499e-10	3.70728e-06	3.43589e-06	1.93188e-09
Glyma.14G070700	4	0	0	0	4	0	0	4	4	4	0	0	4	0	4	0	4	0	0	0	0	4	0	0	4	8	8	0	0	4	52	1.41499e-10	3.70728e-06	3.43589e-06	1.93188e-09
Glyma.15G051900	4	0	0	0	4	0	0	4	4	4	0	0	4	0	4	0	4	0	0	0	0	4	4	4	0	4	4	4	0	4	52	1.41499e-10	3.70728e-06	3.43589e-06	1.93188e-09
Glyma.15G127100	4	0	0	0	0	0	0	4	4	4	0	0	4	0	4	0	4	0	0	0	0	4	4	4	4	4	4	4	0	4	52	1.41499e-10	3.70728e-06	3.43589e-06	1.93188e-09
Glyma.15G162900	4	0	0	0	0	0	0	4	4	4	0	0	4	0	4	0	4	4	0	0	0	4	4	4	4	4	4	0	0	4	52	1.41499e-10	3.70728e-06	3.43589e-06	1.93188e-09
Glyma.16G135200	4	0	0	0	4	0	0	4	4	4	0	0	4	0	0	0	0	0	0	0	0	4	0	0	8	8	8	4	0	4	52	1.41499e-10	3.70728e-06	3.43589e-06	1.93188e-09
Glyma.18G271500	8	0	0	0	4	0	0	4	0	4	0	0	4	0	4	0	4	0	0	0	0	4	0	0	8	12	0	0	0	4	52	1.41499e-10	3.70728e-06	3.43589e-06	1.93188e-09
Glyma.19G092300	4	0	0	0	4	0	0	4	4	4	0	0	4	0	4	0	12	0	0	4	0	0	4	0	4	4	0	0	0	4	52	1.41499e-10	3.70728e-06	3.43589e-06	1.93188e-09
Glyma.20G112200	4	0	0	0	4	0	0	4	4	4	0	0	4	0	4	0	4	0	0	0	4	4	0	0	4	4	4	4	0	4	52	1.41499e-10	3.70728e-06	3.43589e-06	1.93188e-09
Glyma.03G039509	0	0	2	0	2	0	0	7	2	7	0	2	2	1	0	0	7	2	0	0	1	0	1	6	6	5	3	0	0	4	52	1.41499e-10	3.70728e-06	3.43589e-06	1.93188e-09
Glyma.06G202300	10	0	0	0	2	0	0	6	7	6	2	2	7	3	4	0	7	0	0	1	0	5	4	3	6	2	1	1	0	11	68	1.42683e-10	3.73828e-06	3.46448e-06	1.94702e-09
Glyma.16G091300	14	0	0	0	4	0	0	2	4	2	0	0	12	0	2	0	12	0	0	0	0	0	4	0	12	12	2	0	0	12	70	1.50341e-10	3.93894e-06	3.65029e-06	2.05046e-09
Glyma.13G133400	4	0	0	0	0	0	0	4	0	4	0	0	0	0	0	0	4	0	0	1	3	4	4	3	4	0	3	3	0	0	41	1.52229e-10	3.98841e-06	3.69567e-06	2.07298e-09
Glyma.14G100766	1	0	0	0	0	0	0	5	5	5	0	0	0	0	3	0	5	0	0	1	0	2	2	3	5	2	2	0	0	0	41	1.52229e-10	3.98841e-06	3.69567e-06	2.07298e-09
Glyma.09G053100	0	0	0	0	0	0	0	5	6	5	0	0	0	0	0	0	6	1	1	1	0	0	2	3	0	5	5	1	0	0	41	1.52229e-10	3.98841e-06	3.69567e-06	2.07298e-09
Glyma.07G168500	10	0	1	0	5	0	0	11	5	11	0	2	16	0	3	0	7	0	0	0	0	5	3	1	14	4	2	0	0	18	82	1.55377e-10	4.07088e-06	3.77193e-06	2.11474e-09
Glyma.15G209300	4	0	0	0	6	0	0	5	12	5	0	0	15	0	4	0	13	0	0	0	0	6	1	2	3	9	5	1	0	15	76	1.61034e-10	4.21909e-06	3.9091e-06	2.1906e-09
Glyma.18G140800	5	0	1	0	4	0	0	5	5	5	0	0	5	1	2	0	4	0	0	0	0	4	3	1	5	5	3	1	0	5	54	1.7795e-10	4.66228e-06	4.31937e-06	2.41819e-09
Glyma.19G108600	4	0	2	0	1	0	0	5	4	5	0	0	5	1	4	0	5	0	0	1	0	4	1	3	4	5	5	0	0	5	54	1.7795e-10	4.66228e-06	4.31937e-06	2.41819e-09
Glyma.01G045100	2	0	1	0	2	2	5	5	2	5	0	1	2	2	2	0	4	1	0	0	0	2	3	1	5	2	2	1	0	3	49	1.78187e-10	4.66851e-06	4.32478e-06	2.41891e-09
Glyma.17G190800	6	0	0	0	2	0	0	6	3	6	0	0	3	0	0	0	5	0	0	0	0	3	2	0	6	6	4	0	0	3	49	1.78187e-10	4.66851e-06	4.32478e-06	2.41891e-09
Glyma.14G119000	6	0	0	0	1	0	0	6	7	6	0	2	7	3	4	0	9	0	0	0	0	2	0	3	7	5	2	2	0	9	63	1.96616e-10	5.15134e-06	4.76991e-06	2.65396e-09
Glyma.16G024900	6	0	0	0	3	0	0	6	6	6	0	3	6	3	6	0	6	0	0	0	0	6	3	6	6	0	0	0	0	9	63	1.96616e-10	5.15134e-06	4.76991e-06	2.65396e-09
Glyma.17G180800	6	0	0	0	0	0	0	3	6	3	0	3	6	0	3	0	18	0	0	3	0	9	3	0	3	6	0	0	0	9	63	1.96616e-10	5.15134e-06	4.76991e-06	2.65396e-09
Glyma.19G063300	9	0	0	0	3	0	0	6	3	6	0	0	9	0	0	0	9	0	0	0	0	6	6	0	6	3	6	0	0	9	63	1.96616e-10	5.15134e-06	4.76991e-06	2.65396e-09
Glyma.20G005100	6	0	0	0	0	0	0	6	6	6	0	3	6	3	0	0	6	6	0	0	0	6	0	0	6	6	6	0	0	9	63	1.96616e-10	5.15134e-06	4.76991e-06	2.65396e-09
Glyma.20G050700	9	0	0	0	3	0	0	6	9	6	0	0	9	0	0	0	9	0	0	0	0	6	6	0	3	6	0	0	0	9	63	1.96616e-10	5.15134e-06	4.76991e-06	2.65396e-09
Glyma.04G050200	0	0	9	0	0	0	0	0	0	0	0	0	9	0	0	0	9	9	0	9	0	0	0	0	9	9	9	0	0	9	63	1.96616e-10	5.15134e-06	4.76991e-06	2.65396e-09
Glyma.16G181000	0	0	0	0	3	0	0	9	3	9	0	0	9	0	9	0	3	0	0	3	0	9	3	3	3	3	3	0	0	9	63	1.96616e-10	5.15134e-06	4.76991e-06	2.65396e-09
Glyma.03G036700	6	0	0	0	3	0	0	6	6	6	0	3	6	3	0	0	9	0	0	0	0	6	3	3	6	3	3	0	0	9	63	1.96616e-10	5.15134e-06	4.76991e-06	2.65396e-09
Glyma.05G056500	6	0	0	0	6	0	0	0	0	0	0	3	6	3	6	0	6	3	0	0	0	6	6	3	6	6	3	3	0	9	63	1.96616e-10	5.15134e-06	4.76991e-06	2.65396e-09
Glyma.07G156500	6	0	0	0	6	0	0	6	6	6	0	3	6	0	6	0	6	0	0	0	0	6	3	0	6	6	0	0	0	9	63	1.96616e-10	5.15134e-06	4.76991e-06	2.65396e-09
Glyma.03G036500	2	0	0	0	2	0	0	4	6	4	0	2	0	2	6	0	4	2	0	0	0	2	0	4	4	2	2	0	0	2	46	2.14124e-10	5.61006e-06	5.19187e-06	2.87106e-09
Glyma.03G153500	5	0	0	0	5	0	0	5	5	5	0	5	5	0	5	0	5	0	0	0	0	5	5	5	5	5	5	0	0	10	65	2.14124e-10	5.61006e-06	5.19187e-06	2.87106e-09
Glyma.06G167900	2	0	0	0	2	0	0	4	4	4	0	0	2	0	2	0	6	2	0	0	2	4	2	2	4	4	2	0	0	2	46	2.14124e-10	5.61006e-06	5.19187e-06	2.87106e-09
Glyma.06G319520	5	0	5	0	5	0	0	0	5	0	0	5	5	5	5	0	5	5	0	0	0	0	5	0	5	5	5	5	0	10	65	2.14124e-10	5.61006e-06	5.19187e-06	2.87106e-09
Glyma.07G072900	2	0	0	0	2	0	0	10	2	10	0	0	2	0	2	2	2	0	0	0	0	2	2	0	4	2	2	2	0	2	46	2.14124e-10	5.61006e-06	5.19187e-06	2.87106e-09
Glyma.07G171100	2	0	0	0	2	0	0	8	6	8	0	0	2	0	2	0	4	0	0	2	0	0	0	2	8	2	0	0	0	2	46	2.14124e-10	5.61006e-06	5.19187e-06	2.87106e-09
Glyma.08G263800	10	0	5	0	5	0	0	5	0	5	0	0	10	0	5	0	5	0	0	0	0	5	0	0	5	5	5	5	0	10	65	2.14124e-10	5.61006e-06	5.19187e-06	2.87106e-09
Glyma.08G339500	2	0	2	0	4	0	0	4	4	4	0	0	2	0	4	0	0	2	2	0	0	2	2	4	6	2	2	0	0	2	46	2.14124e-10	5.61006e-06	5.19187e-06	2.87106e-09
Glyma.09G097900	1	0	0	0	7	0	0	8	1	8	0	1	1	0	0	0	2	0	0	0	0	6	1	0	9	2	0	1	0	2	46	2.14124e-10	5.61006e-06	5.19187e-06	2.87106e-09
Glyma.09G148100	4	0	0	0	2	0	0	6	2	6	0	0	2	0	2	0	4	0	0	0	0	2	2	0	8	4	2	2	0	2	46	2.14124e-10	5.61006e-06	5.19187e-06	2.87106e-09
Glyma.19G027100	5	0	0	0	1	0	0	2	2	2	0	0	2	1	1	0	7	2	0	0	0	5	2	3	4	2	2	5	0	2	46	2.14124e-10	5.61006e-06	5.19187e-06	2.87106e-09
Glyma.02G007500	0	0	10	0	5	0	0	0	0	0	0	5	5	5	5	0	5	0	0	5	0	5	5	0	5	5	5	5	0	10	65	2.14124e-10	5.61006e-06	5.19187e-06	2.87106e-09
Glyma.03G054800	0	0	2	0	0	0	0	0	6	0	0	0	2	0	0	0	16	0	0	0	0	0	0	0	2	10	6	4	0	2	46	2.14124e-10	5.61006e-06	5.19187e-06	2.87106e-09
Glyma.01G082200	4	0	0	0	4	4	4	4	4	4	0	0	6	0	0	0	6	0	0	2	0	4	2	0	4	4	4	2	0	6	56	2.15306e-10	5.64102e-06	5.2188e-06	2.87514e-09
Glyma.03G251400	8	0	0	0	4	0	0	6	0	6	0	0	6	0	4	0	6	0	0	0	0	4	0	0	6	6	6	0	0	6	56	2.15306e-10	5.64102e-06	5.2188e-06	2.87514e-09
Glyma.07G109900	2	0	0	0	4	0	0	4	4	4	0	2	4	2	4	0	4	0	0	2	0	4	12	4	2	2	2	0	0	6	56	2.15306e-10	5.64102e-06	5.2188e-06	2.87514e-09
Glyma.07G206900	3	0	1	0	3	0	0	4	4	4	0	2	4	3	2	0	4	0	0	4	0	4	1	4	4	4	3	4	0	6	56	2.15306e-10	5.64102e-06	5.2188e-06	2.87514e-09
Glyma.12G229500	4	0	0	0	4	0	0	4	4	4	0	2	4	2	2	0	4	2	0	2	0	4	2	2	4	4	2	6	0	6	56	2.15306e-10	5.64102e-06	5.2188e-06	2.87514e-09
Glyma.13G071900	2	0	0	0	5	0	0	5	5	5	0	1	5	1	3	0	5	2	0	1	0	5	1	1	3	5	4	3	0	6	56	2.15306e-10	5.64102e-06	5.2188e-06	2.87514e-09
Glyma.15G226800	6	0	0	0	6	0	0	0	6	0	0	0	6	0	6	0	6	6	0	0	0	0	0	0	8	4	4	4	0	6	56	2.15306e-10	5.64102e-06	5.2188e-06	2.87514e-09
Glyma.18G066500	4	0	2	0	4	0	0	4	6	4	0	0	6	0	2	0	4	0	0	0	0	2	2	2	14	4	2	0	0	6	56	2.15306e-10	5.64102e-06	5.2188e-06	2.87514e-09
Glyma.18G150700	9	0	0	0	5	0	0	3	6	3	0	0	11	0	1	0	8	0	0	0	0	6	5	0	10	6	3	2	0	11	67	2.28647e-10	5.99056e-06	5.54195e-06	3.05174e-09
Glyma.10G134700	1	0	1	0	1	0	0	7	7	7	0	0	4	0	2	0	9	0	0	0	0	0	1	4	7	4	0	0	0	4	51	2.33555e-10	6.11915e-06	5.66022e-06	3.11249e-09
Glyma.15G146900	4	0	2	0	0	0	0	4	4	4	0	0	4	0	4	0	4	0	0	0	2	4	2	3	4	4	4	2	0	4	51	2.33555e-10	6.11915e-06	5.66022e-06	3.11249e-09
Glyma.17G202500	7	0	0	0	0	0	0	7	0	7	0	4	0	0	0	0	4	0	0	0	0	4	1	4	6	6	5	0	0	4	51	2.33555e-10	6.11915e-06	5.66022e-06	3.11249e-09
Glyma.03G069600	12	0	0	0	0	0	0	6	9	6	0	0	12	0	0	0	18	0	0	0	0	0	3	0	6	6	3	0	0	12	69	2.3992e-10	6.28592e-06	5.81399e-06	3.19406e-09
Glyma.13G190000	12	0	0	0	0	0	0	0	12	0	0	0	12	0	9	0	12	0	0	0	0	3	3	6	6	6	0	0	0	12	69	2.3992e-10	6.28592e-06	5.81399e-06	3.19406e-09
Glyma.03G032800	5	0	1	0	3	0	0	3	6	3	0	0	1	0	1	0	8	0	0	0	0	3	2	0	4	3	0	1	0	1	43	2.42415e-10	6.35126e-06	5.87395e-06	3.22399e-09
Glyma.09G094200	1	0	0	0	7	0	0	8	1	8	0	0	1	0	0	0	1	0	0	0	0	6	1	0	7	2	1	0	0	1	43	2.42414e-10	6.35126e-06	5.87395e-06	3.22399e-09
Glyma.16G168900	7	0	0	0	8	0	0	0	0	0	0	7	10	9	5	5	7	3	0	1	0	8	5	0	0	8	7	6	0	17	79	2.48603e-10	6.5134e-06	6.02365e-06	3.30462e-09
Glyma.01G093400	4	0	0	0	0	3	4	5	6	5	0	0	0	0	1	0	2	0	0	0	0	0	0	0	8	1	0	1	0	0	40	2.53963e-10	6.65383e-06	6.14438e-06	3.31531e-09
Glyma.01G120000	2	1	1	1	2	2	2	2	4	2	0	0	0	1	1	0	4	0	0	1	0	1	3	2	3	2	2	1	0	0	40	2.53963e-10	6.65383e-06	6.14438e-06	3.31531e-09
Glyma.02G094000	8	0	0	0	0	0	8	8	0	8	0	0	0	8	0	0	0	0	0	0	0	0	0	0	0	0	0	0	0	0	40	2.53963e-10	6.65383e-06	6.14438e-06	3.31531e-09
Glyma.02G229700	8	0	0	0	0	0	0	4	8	4	0	0	0	0	0	0	4	0	0	0	0	4	4	0	4	0	0	0	0	0	40	2.53963e-10	6.65383e-06	6.14438e-06	3.31531e-09
Glyma.03G060701	10	0	0	0	3	0	0	7	9	7	0	0	14	0	1	0	8	0	0	0	0	2	2	2	8	8	4	1	1	14	73	2.52473e-10	6.61479e-06	6.11615e-06	3.31531e-09
Glyma.06G019300	4	0	4	0	4	0	0	0	0	0	0	0	0	4	0	0	0	0	0	0	0	4	4	4	4	4	4	0	0	0	40	2.53963e-10	6.65383e-06	6.14438e-06	3.31531e-09
Glyma.06G144300	5	0	0	0	5	0	0	0	5	0	0	0	0	0	0	0	0	0	0	0	0	5	5	5	0	5	5	0	0	0	40	2.53963e-10	6.65383e-06	6.14438e-06	3.31531e-09
Glyma.06G189400	4	0	2	0	4	0	0	4	4	4	0	3	4	0	4	1	4	1	0	0	0	4	4	4	4	4	3	3	0	7	58	2.51971e-10	6.60163e-06	6.10424e-06	3.31531e-09
Glyma.10G140500	4	0	0	0	4	0	0	0	8	0	0	0	0	0	0	0	8	0	0	0	0	4	0	0	4	4	4	0	0	0	40	2.53963e-10	6.65383e-06	6.14438e-06	3.31531e-09
Glyma.11G080600	8	0	0	0	0	0	0	0	0	0	0	0	0	0	0	0	8	0	0	0	0	0	0	0	8	8	8	0	0	0	40	2.53963e-10	6.65383e-06	6.14438e-06	3.31531e-09
Glyma.13G138300	4	0	4	0	0	0	0	4	4	4	0	0	0	0	0	0	4	0	0	0	0	4	4	4	0	0	0	4	0	0	40	2.53963e-10	6.65383e-06	6.14438e-06	3.31531e-09
Glyma.14G123200	4	0	0	0	4	0	0	5	6	5	0	2	5	0	5	0	9	0	0	1	0	2	2	1	7	4	3	0	0	7	58	2.51971e-10	6.60163e-06	6.10424e-06	3.31531e-09
Glyma.16G090300	12	0	0	0	7	0	0	1	6	1	0	0	16	0	4	0	12	0	0	2	0	0	4	0	13	11	4	0	0	16	77	2.52569e-10	6.6173e-06	6.11822e-06	3.31531e-09
Glyma.17G137300	3	0	3	0	3	0	0	1	3	1	0	0	0	0	3	1	3	0	0	3	0	3	2	3	3	3	2	0	0	0	40	2.53963e-10	6.65383e-06	6.14438e-06	3.31531e-09
Glyma.17G231700	4	0	0	0	0	0	0	4	0	4	0	0	0	0	0	0	4	0	0	0	0	0	4	4	4	4	4	4	0	0	40	2.53963e-10	6.65383e-06	6.14438e-06	3.31531e-09
Glyma.18G229500	5	0	0	0	0	0	0	5	0	5	0	0	0	0	0	0	0	0	0	0	0	0	5	5	5	5	5	0	0	0	40	2.53963e-10	6.65383e-06	6.14438e-06	3.31531e-09
Glyma.18G300200	6	0	0	0	0	0	0	0	0	0	0	0	0	0	0	0	6	0	0	0	0	0	6	4	6	6	0	6	0	0	40	2.53963e-10	6.65383e-06	6.14438e-06	3.31531e-09
Glyma.19G011300	10	0	0	0	0	0	0	0	5	0	0	0	0	0	0	0	0	0	0	0	0	5	5	5	5	5	0	0	0	0	40	2.53963e-10	6.65383e-06	6.14438e-06	3.31531e-09
Glyma.19G062300	7	0	1	0	0	0	0	1	8	1	0	0	7	0	2	0	6	0	0	1	0	6	7	0	7	7	3	1	0	7	58	2.51971e-10	6.60163e-06	6.10424e-06	3.31531e-09
Glyma.19G074100	6	0	0	0	2	0	0	2	5	2	0	1	6	0	4	0	6	0	0	1	0	5	3	4	6	6	6	0	0	7	58	2.51971e-10	6.60163e-06	6.10424e-06	3.31531e-09
Glyma.19G145800	10	0	0	0	10	0	0	0	10	0	0	0	0	0	0	0	0	0	0	0	0	0	0	10	0	0	0	0	0	0	40	2.53963e-10	6.65383e-06	6.14438e-06	3.31531e-09
Glyma.19G204800	6	0	0	0	0	0	0	0	0	0	0	0	0	0	0	0	4	0	0	0	0	6	2	0	6	6	6	4	0	0	40	2.53963e-10	6.65383e-06	6.14438e-06	3.31531e-09
Glyma.20G022900	5	0	0	0	0	0	0	0	5	0	0	0	0	0	0	0	10	0	0	0	0	0	5	5	5	5	0	0	0	0	40	2.53963e-10	6.65383e-06	6.14438e-06	3.31531e-09
Glyma.17G145200	0	0	4	0	0	0	0	0	0	0	0	0	0	0	0	0	8	0	0	0	0	0	0	0	8	4	8	8	0	0	40	2.53963e-10	6.65383e-06	6.14438e-06	3.31531e-09
Glyma.05G025700	0	0	0	0	8	0	0	0	0	0	0	0	0	0	0	0	8	0	0	0	0	8	0	0	8	8	0	0	0	0	40	2.53963e-10	6.65383e-06	6.14438e-06	3.31531e-09
Glyma.10G139000	0	0	0	0	6	0	0	6	6	6	0	0	0	0	0	0	8	0	0	0	0	6	2	0	0	0	0	0	0	0	40	2.53963e-10	6.65383e-06	6.14438e-06	3.31531e-09
Glyma.10G141500	0	0	0	0	4	0	0	4	4	4	0	0	0	0	0	0	4	0	0	4	0	4	4	0	4	0	0	4	0	0	40	2.53963e-10	6.65383e-06	6.14438e-06	3.31531e-09
[truncated: 24,202 more rows]

## Sheet: Oleic_Acid
	geneId	VTSweet_LG	PI417206_LG	V10_3653_LG	PI417491_LG	MFS_561_SS	V18_2132_SS	Zizuka_SS	S16_15170C_Y	Hutcheson_Y	S15_15809C_Y	V12_4590_HP	S17_17168_HP	V18_2523HO_HP	V18_2764HOLA_FA_O	PI084639_Met	PI561286_Met	PI543794_Met	PI594409A_Met	V16_0611_HH	PI506730_HH	PI423823_HH	PI243551_LL	PI424364B_LL	PI408233B_LL	PI398256_LL	WM82.df	V16_0565_HH	N16_1296_HOLN	V18_0621HOA_FA_O	High_Oleic	Normal_Oleic	p_val	Bonferroni	hochberg	BH
3179	Glyma.05G086400	222	24	0	0	54	0	0	492	225	492	12	12	381	33	330	0	0	21	3	27	0	303	201	84	36	3	84	0	30	30	3039	0	0	0	0
13840	Glyma.20G056500	330	24	6	0	93	0	0	480	294	480	18	30	573	54	522	9	0	63	9	72	0	345	246	81	63	0	126	0	27	27	3918	0	0	0	0
12170	Glyma.18G111600	2	0	0	0	2	0	0	2	2	2	0	2	2	1	0	1	0	1	0	1	0	3	1	1	2	0	0	1	2	3	25	3.21595556320068e-05	0.84258	0.576782	0.000101933
12906	Glyma.18G276200	2	0	0	0	1	0	0	3	0	3	0	1	1	1	1	2	0	1	0	1	0	2	2	2	1	0	1	0	3	3	25	3.21595556320068e-05	0.84258	0.576782	0.000101933
159	Glyma.01G063250	1	0	0	0	1	2	1	1	2	1	0	0	1	1	1	0	0	0	0	1	1	2	1	2	0	0	1	0	1	1	20	3.38127256330157e-05	0.885893	0.604707	0.000106516
765	Glyma.02G005600	2	0	0	0	1	0	2	0	0	0	0	1	2	1	2	1	0	0	0	0	0	1	2	2	1	0	2	0	1	1	20	3.38127256330157e-05	0.885893	0.604707	0.000106516
1025	Glyma.02G099900	2	0	0	0	0	0	1	3	2	3	0	0	0	0	1	0	2	2	0	0	2	0	0	0	0	0	2	0	1	1	20	3.38127256330157e-05	0.885893	0.604707	0.000106516
1050	Glyma.02G108000	1	0	1	0	1	0	1	1	1	1	0	1	1	1	1	1	0	1	0	1	1	1	1	1	1	0	1	0	1	1	20	3.38127256330157e-05	0.885893	0.604707	0.000106516
1661	Glyma.03G014250	2	0	0	0	2	0	0	1	2	1	0	0	2	2	2	0	0	0	0	0	2	1	1	0	0	0	2	0	1	1	20	3.38127256330157e-05	0.885893	0.604707	0.000106516
1735	Glyma.03G032400	1	0	0	0	2	0	0	3	1	3	0	2	0	1	0	0	0	0	0	0	0	1	2	2	0	0	2	0	1	1	20	3.38127256330157e-05	0.885893	0.604707	0.000106516
1793	Glyma.03G041950	2	0	1	0	2	0	0	2	0	2	0	0	1	1	0	0	0	0	0	2	0	2	1	2	0	0	2	0	1	1	20	3.38127256330157e-05	0.885893	0.604707	0.000106516
2138	Glyma.03G128700	2	0	0	0	1	0	0	2	1	2	0	1	0	0	1	0	0	1	0	1	1	2	2	1	0	0	2	0	1	1	20	3.38127256330157e-05	0.885893	0.604707	0.000106516
2616	Glyma.04G121900	3	0	0	0	0	0	0	0	3	0	0	0	0	1	3	0	0	0	0	1	1	2	3	1	1	0	1	0	1	1	20	3.38127256330157e-05	0.885893	0.604707	0.000106516
2649	Glyma.04G133800	1	0	0	0	0	0	0	0	5	0	0	1	0	3	2	0	0	0	0	1	1	5	0	1	0	0	0	0	1	1	20	3.38127256330157e-05	0.885893	0.604707	0.000106516
2903	Glyma.04G220551	2	0	1	0	2	0	0	0	0	0	0	0	2	0	2	0	0	2	0	2	0	1	2	2	2	0	0	1	0	1	20	3.38127256330157e-05	0.885893	0.604707	0.000106516
2992	Glyma.05G013300	1	0	1	0	1	0	0	1	1	1	0	1	1	1	2	2	0	0	0	1	1	1	1	1	0	0	2	0	1	1	20	3.38127256330157e-05	0.885893	0.604707	0.000106516
3335	Glyma.05G140200	2	0	0	0	0	0	0	2	0	2	0	0	0	2	2	0	0	2	0	0	1	2	2	2	1	0	0	0	1	1	20	3.38127256330157e-05	0.885893	0.604707	0.000106516
3415	Glyma.05G187500	2	0	1	0	1	0	0	1	1	1	0	0	1	0	3	0	0	1	0	1	0	2	2	1	1	0	1	0	1	1	20	3.38127256330157e-05	0.885893	0.604707	0.000106516
4026	Glyma.06G218500	2	0	1	0	0	0	0	2	1	2	0	0	3	0	2	0	0	0	0	1	1	1	2	1	0	0	1	0	1	1	20	3.38127256330157e-05	0.885893	0.604707	0.000106516
4806	Glyma.07G156700	2	0	0	0	2	0	0	2	2	2	0	0	2	0	2	0	0	0	0	0	0	2	2	0	0	0	2	0	1	1	20	3.38127256330157e-05	0.885893	0.604707	0.000106516
4960	Glyma.07G196500	1	0	1	0	1	0	0	1	1	1	0	1	1	1	1	1	1	0	1	1	1	1	1	1	0	1	1	0	1	1	20	3.38127256330157e-05	0.885893	0.604707	0.000106516
5075	Glyma.07G256700	2	0	1	0	2	0	0	1	1	1	0	0	2	1	3	0	0	0	0	0	1	1	1	1	1	0	1	0	1	1	20	3.38127256330157e-05	0.885893	0.604707	0.000106516
5116	Glyma.08G018900	1	0	0	0	1	0	0	1	1	1	0	1	1	1	4	1	0	0	0	0	1	1	0	0	4	0	1	0	1	1	20	3.38127256330157e-05	0.885893	0.604707	0.000106516
5423	Glyma.08G231800	1	0	0	0	1	0	0	2	2	2	0	0	1	2	2	1	0	0	0	0	2	1	2	1	0	0	0	0	1	1	20	3.38127256330157e-05	0.885893	0.604707	0.000106516
6303	Glyma.09G175550	1	0	0	0	1	0	0	1	3	1	0	1	3	0	1	0	0	1	0	1	1	1	1	1	1	0	1	0	1	1	20	3.38127256330157e-05	0.885893	0.604707	0.000106516
6621	Glyma.10G006700	2	0	1	0	1	0	0	1	1	1	0	0	1	1	1	0	0	1	0	1	1	1	2	2	1	0	1	0	1	1	20	3.38127256330157e-05	0.885893	0.604707	0.000106516
7211	Glyma.10G228100	1	0	0	0	0	0	0	2	3	2	0	0	0	1	2	0	0	0	0	0	1	3	2	1	1	0	1	0	1	1	20	3.38127256330157e-05	0.885893	0.604707	0.000106516
7572	Glyma.11G155050	2	0	0	0	1	0	0	1	2	1	0	1	2	0	2	1	1	0	0	0	1	3	1	0	0	0	1	0	1	1	20	3.38127256330157e-05	0.885893	0.604707	0.000106516
7786	Glyma.11G227900	2	0	0	0	1	0	0	1	2	1	0	0	0	2	2	0	0	1	0	1	0	2	2	1	1	0	1	0	1	1	20	3.38127256330157e-05	0.885893	0.604707	0.000106516
8657	Glyma.13G095700	2	0	0	0	1	0	0	2	2	2	0	0	2	1	0	0	0	0	0	1	1	2	2	1	0	0	1	0	1	1	20	3.38127256330157e-05	0.885893	0.604707	0.000106516
8989	Glyma.13G208251	1	0	1	0	0	0	0	1	1	1	0	1	1	0	1	1	0	1	1	1	1	1	1	1	1	0	3	0	1	1	20	3.38127256330157e-05	0.885893	0.604707	0.000106516
9198	Glyma.13G304601	1	0	1	0	1	0	0	1	1	1	0	1	1	1	1	1	0	1	1	1	1	1	1	1	1	0	1	0	1	1	20	3.38127256330157e-05	0.885893	0.604707	0.000106516
9366	Glyma.14G046700	1	0	0	0	1	0	0	1	1	1	0	1	2	2	1	1	0	1	1	1	1	1	0	1	1	0	1	0	1	1	20	3.38127256330157e-05	0.885893	0.604707	0.000106516
9886	Glyma.15G020400	1	0	1	0	1	0	0	1	1	1	0	1	1	1	1	1	1	1	0	1	1	1	1	1	1	0	1	0	1	1	20	3.38127256330157e-05	0.885893	0.604707	0.000106516
9913	Glyma.15G052100	1	0	0	0	3	0	0	1	1	1	0	0	0	1	3	0	0	0	0	1	1	3	1	1	1	0	1	0	1	1	20	3.38127256330157e-05	0.885893	0.604707	0.000106516
10248	Glyma.15G172500	2	0	0	0	2	0	0	0	2	0	0	0	2	2	0	0	0	0	0	2	0	2	2	2	0	0	2	0	1	1	20	3.38127256330157e-05	0.885893	0.604707	0.000106516
10488	Glyma.15G247700	2	0	1	0	1	0	0	1	2	1	0	1	2	1	1	0	0	1	0	0	1	2	1	1	0	0	1	0	1	1	20	3.38127256330157e-05	0.885893	0.604707	0.000106516
10791	Glyma.16G066000	2	0	0	0	2	0	0	2	2	2	0	1	2	2	0	0	0	0	0	0	0	2	1	0	0	0	2	0	1	1	20	3.38127256330157e-05	0.885893	0.604707	0.000106516
11497	Glyma.17G144700	1	0	0	0	1	0	0	1	1	1	0	1	1	1	1	1	0	0	0	2	1	2	2	2	0	0	1	0	1	1	20	3.38127256330157e-05	0.885893	0.604707	0.000106516
11699	Glyma.17G202200	2	0	1	0	0	0	0	2	0	2	0	0	0	0	1	2	0	0	0	1	2	2	2	2	0	0	1	0	1	1	20	3.38127256330157e-05	0.885893	0.604707	0.000106516
12103	Glyma.18G090800	4	0	0	0	1	0	0	0	2	0	0	1	1	2	1	0	0	0	0	0	1	1	2	1	2	0	1	0	1	1	20	3.38127256330157e-05	0.885893	0.604707	0.000106516
12192	Glyma.18G121751	1	0	1	0	1	0	0	1	1	1	0	0	1	2	1	1	0	1	0	1	1	1	1	1	1	0	2	0	1	1	20	3.38127256330157e-05	0.885893	0.604707	0.000106516
12265	Glyma.18G136500	1	0	0	0	1	0	0	3	1	3	0	1	1	1	1	0	0	0	0	1	1	1	1	1	1	0	1	0	1	1	20	3.38127256330157e-05	0.885893	0.604707	0.000106516
12410	Glyma.18G164800	1	0	1	0	1	0	0	2	1	2	0	1	1	1	1	1	0	1	0	1	1	1	1	1	0	0	1	0	1	1	20	3.38127256330157e-05	0.885893	0.604707	0.000106516
12537	Glyma.18G190700	1	0	0	0	1	0	0	1	1	1	0	1	1	1	4	1	0	1	0	1	1	1	1	1	0	0	1	0	1	1	20	3.38127256330157e-05	0.885893	0.604707	0.000106516
13438	Glyma.19G153000	1	0	0	0	0	0	0	2	1	2	0	2	1	1	1	1	0	1	0	1	1	1	2	0	0	0	2	0	1	1	20	3.38127256330157e-05	0.885893	0.604707	0.000106516
13540	Glyma.19G198600	2	0	1	0	2	0	0	2	2	2	0	0	0	0	2	0	0	0	2	2	1	0	1	0	0	0	1	0	1	1	20	3.38127256330157e-05	0.885893	0.604707	0.000106516
14781	Glyma.18G261700	0	0	1	0	1	0	0	1	1	1	0	1	1	1	2	0	0	2	0	1	1	2	1	2	0	0	1	0	1	1	20	3.38127256330157e-05	0.885893	0.604707	0.000106516
16070	Glyma.11G109000	0	0	0	0	2	0	0	0	0	0	0	2	0	0	2	0	0	2	0	2	2	0	2	2	2	0	2	0	1	1	20	3.38127256330157e-05	0.885893	0.604707	0.000106516
16489	Glyma.15G223100	0	0	0	0	2	0	0	0	2	0	0	2	2	2	1	0	0	2	0	0	2	0	3	2	0	0	0	0	1	1	20	3.38127256330157e-05	0.885893	0.604707	0.000106516
16898	Glyma.20G007500	0	0	0	0	2	0	0	0	4	0	0	0	0	0	3	0	0	0	0	0	0	4	4	3	0	0	0	0	1	1	20	3.38127256330157e-05	0.885893	0.604707	0.000106516
16968	Glyma.20G212100	0	0	0	0	1	0	0	1	2	1	0	0	2	1	2	0	0	0	1	0	1	2	2	2	0	0	2	0	1	1	20	3.38127256330157e-05	0.885893	0.604707	0.000106516
17595	Glyma.06G143900	0	0	0	0	0	0	0	2	0	2	0	2	0	2	2	0	0	0	0	2	2	2	2	2	0	0	0	0	1	1	20	3.38127256330157e-05	0.885893	0.604707	0.000106516
18438	Glyma.13G211000	0	0	0	0	0	0	0	2	0	2	0	2	1	0	2	1	0	0	0	0	0	3	3	2	2	0	0	0	1	1	20	3.38127256330157e-05	0.885893	0.604707	0.000106516
18509	Glyma.14G001800	0	0	0	0	0	0	0	1	2	1	0	0	0	0	2	0	2	2	0	1	2	2	2	2	1	0	0	0	1	1	20	3.38127256330157e-05	0.885893	0.604707	0.000106516
54	Glyma.01G024400	1	0	0	0	1	1	1	1	1	1	0	0	1	1	1	0	0	1	0	1	0	1	1	1	1	0	1	0	0	0	17	3.73798184017016e-05	0.979351	0.658931	0.000114237
56	Glyma.01G024900	1	0	0	0	2	2	1	1	1	1	0	1	0	0	1	0	0	1	0	1	0	1	1	0	0	0	2	0	0	0	17	3.73798184017016e-05	0.979351	0.658931	0.000114237
222	Glyma.01G080300	1	0	0	0	1	1	1	1	1	1	0	1	1	1	1	0	0	1	0	1	0	1	1	1	0	0	1	0	0	0	17	3.73798184017016e-05	0.979351	0.658931	0.000114237
449	Glyma.01G129400	1	0	0	0	1	0	1	1	1	1	0	0	1	1	1	0	0	1	0	1	1	1	1	1	1	0	1	0	0	0	17	3.73798184017016e-05	0.979351	0.658931	0.000114237
505	Glyma.01G143900	1	0	0	0	1	0	0	1	1	1	0	1	1	1	1	1	0	1	0	1	1	1	1	1	0	0	1	0	0	0	17	3.73798184017016e-05	0.979351	0.658931	0.000114237
546	Glyma.01G155700	2	0	0	0	2	0	2	2	0	2	0	0	0	2	2	1	0	0	0	0	0	2	0	0	0	0	0	0	0	0	17	3.73798184017016e-05	0.979351	0.658931	0.000114237
641	Glyma.01G207950	1	0	0	0	1	0	1	1	1	1	1	1	1	1	1	0	0	0	0	1	1	1	1	1	0	0	1	0	0	0	17	3.73798184017016e-05	0.979351	0.658931	0.000114237
690	Glyma.01G222900	1	0	0	0	0	0	1	1	1	1	0	1	0	0	2	0	0	1	0	1	1	2	2	2	0	0	0	0	0	0	17	3.73798184017016e-05	0.979351	0.658931	0.000114237
840	Glyma.02G045400	1	0	1	0	1	0	1	1	1	1	0	1	1	1	1	0	0	0	0	1	1	1	1	1	0	0	1	0	0	0	17	3.73798184017016e-05	0.979351	0.658931	0.000114237
1012	Glyma.02G097800	3	0	1	0	0	0	0	0	2	0	0	1	2	2	1	0	0	0	0	0	2	1	0	0	0	0	2	0	0	0	17	3.73798184017016e-05	0.979351	0.658931	0.000114237
1027	Glyma.02G100300	1	0	1	0	1	0	1	1	1	1	0	1	1	1	1	0	0	0	0	1	1	1	1	1	0	0	1	0	0	0	17	3.73798184017016e-05	0.979351	0.658931	0.000114237
1253	Glyma.02G174400	2	0	0	0	1	0	1	1	1	1	0	0	1	1	2	0	0	0	0	0	0	3	1	1	0	0	1	0	0	0	17	3.73798184017016e-05	0.979351	0.658931	0.000114237
1278	Glyma.02G180200	2	0	0	0	1	0	0	1	2	1	0	0	1	0	0	0	0	0	0	2	0	1	2	2	0	0	2	0	0	0	17	3.73798184017016e-05	0.979351	0.658931	0.000114237
1407	Glyma.02G217700	2	0	0	0	0	0	0	1	2	1	0	0	2	0	2	0	0	0	0	1	0	2	2	1	0	0	1	0	0	0	17	3.73798184017016e-05	0.979351	0.658931	0.000114237
1439	Glyma.02G232600	1	0	1	0	1	0	0	1	1	1	0	1	1	1	1	0	0	0	0	1	1	1	1	1	1	0	1	0	0	0	17	3.73798184017016e-05	0.979351	0.658931	0.000114237
1523	Glyma.02G258800	1	0	1	0	1	0	0	1	1	1	0	1	1	1	1	0	0	0	0	1	1	1	2	1	0	0	1	0	0	0	17	3.73798184017016e-05	0.979351	0.658931	0.000114237
1617	Glyma.02G311466	2	0	0	0	2	0	0	0	2	0	0	1	0	0	2	0	0	0	0	1	1	1	1	2	0	0	2	0	0	0	17	3.73798184017016e-05	0.979351	0.658931	0.000114237
1668	Glyma.03G016400	1	0	0	0	1	0	0	1	1	1	0	1	1	1	1	1	0	1	0	1	1	1	1	1	0	0	1	0	0	0	17	3.73798184017016e-05	0.979351	0.658931	0.000114237
1717	Glyma.03G027950	1	0	0	0	1	0	0	1	1	1	0	0	3	1	1	0	0	1	0	0	1	3	1	0	0	0	1	0	0	0	17	3.73798184017016e-05	0.979351	0.658931	0.000114237
1796	Glyma.03G042900	1	0	1	0	1	0	0	1	1	1	0	1	1	1	2	0	0	1	0	1	0	1	1	1	0	0	1	0	0	0	17	3.73798184017016e-05	0.979351	0.658931	0.000114237
1941	Glyma.03G071900	2	0	0	0	1	0	0	1	1	1	0	0	2	1	2	1	0	0	0	1	0	1	1	1	0	0	1	0	0	0	17	3.73798184017016e-05	0.979351	0.658931	0.000114237
1988	Glyma.03G079500	3	0	0	0	3	0	0	0	0	0	0	0	3	0	2	0	0	0	0	0	0	3	2	1	0	0	0	0	0	0	17	3.73798184017016e-05	0.979351	0.658931	0.000114237
2010	Glyma.03G083900	1	0	0	0	0	0	0	2	1	2	1	0	1	0	3	0	0	0	0	0	0	0	5	1	0	0	0	0	0	0	17	3.73798184017016e-05	0.979351	0.658931	0.000114237
2115	Glyma.03G121700	1	0	0	0	1	0	0	1	1	1	0	1	1	1	1	0	0	0	0	1	1	1	1	2	1	0	1	0	0	0	17	3.73798184017016e-05	0.979351	0.658931	0.000114237
2209	Glyma.03G154400	2	0	1	0	1	0	0	1	1	1	0	1	0	0	3	0	0	1	0	0	0	1	1	2	0	0	1	0	0	0	17	3.73798184017016e-05	0.979351	0.658931	0.000114237
2267	Glyma.03G194700	1	0	0	0	1	0	0	1	1	1	0	0	1	1	1	1	0	1	0	1	1	1	1	1	1	0	1	0	0	0	17	3.73798184017016e-05	0.979351	0.658931	0.000114237
2354	Glyma.03G249100	2	0	0	0	2	0	0	2	0	2	0	0	2	2	0	1	1	0	0	0	0	2	0	0	0	0	1	0	0	0	17	3.73798184017016e-05	0.979351	0.658931	0.000114237
2377	Glyma.03G256100	1	0	0	0	1	0	0	1	1	1	1	1	1	1	1	1	0	0	0	1	1	1	1	1	0	0	1	0	0	0	17	3.73798184017016e-05	0.979351	0.658931	0.000114237
2462	Glyma.04G079800	4	0	0	0	0	0	0	2	1	2	0	0	0	0	1	0	0	0	1	1	0	2	1	0	1	0	1	0	0	0	17	3.73798184017016e-05	0.979351	0.658931	0.000114237
2714	Glyma.04G149750	2	0	0	0	1	0	0	2	3	2	0	0	2	0	2	0	0	0	0	0	0	2	1	0	0	0	0	0	0	0	17	3.73798184017016e-05	0.979351	0.658931	0.000114237
2779	Glyma.04G164800	1	0	0	0	1	0	0	1	1	1	0	0	2	0	2	1	0	0	0	0	0	1	1	1	0	0	4	0	0	0	17	3.73798184017016e-05	0.979351	0.658931	0.000114237
2835	Glyma.04G183350	2	0	0	0	0	0	0	3	0	3	0	0	0	0	0	0	0	0	0	0	0	4	3	0	0	0	2	0	0	0	17	3.73798184017016e-05	0.979351	0.658931	0.000114237
2915	Glyma.04G223400	1	0	0	0	1	0	0	1	1	1	0	0	1	1	1	0	0	0	1	1	1	1	2	2	0	0	1	0	0	0	17	3.73798184017016e-05	0.979351	0.658931	0.000114237
2923	Glyma.04G226500	1	0	1	0	1	0	0	0	1	0	0	0	1	1	1	0	0	1	0	1	1	3	1	1	1	0	1	0	0	0	17	3.73798184017016e-05	0.979351	0.658931	0.000114237
2928	Glyma.04G229800	2	0	0	0	2	0	0	0	2	0	0	0	2	0	2	0	0	0	0	0	1	2	2	2	0	0	0	0	0	0	17	3.73798184017016e-05	0.979351	0.658931	0.000114237
2949	Glyma.04G238300	2	0	0	0	1	0	0	1	1	1	0	0	1	0	2	0	0	0	0	2	1	1	1	2	0	0	1	0	0	0	17	3.73798184017016e-05	0.979351	0.658931	0.000114237
3007	Glyma.05G031300	3	0	0	0	0	0	0	0	0	0	0	0	3	0	3	0	0	3	0	0	0	0	2	3	0	0	0	0	0	0	17	3.73798184017016e-05	0.979351	0.658931	0.000114237
3053	Glyma.05G043900	1	0	1	0	1	0	0	1	1	1	0	1	1	1	1	0	0	1	0	1	1	1	1	1	0	0	1	0	0	0	17	3.73798184017016e-05	0.979351	0.658931	0.000114237
3098	Glyma.05G063100	2	0	0	0	1	0	0	1	1	1	0	0	2	2	2	0	0	0	0	0	0	2	2	0	0	0	1	0	0	0	17	3.73798184017016e-05	0.979351	0.658931	0.000114237
3125	Glyma.05G074200	1	0	0	0	1	0	0	1	1	1	0	0	1	1	3	0	0	0	0	0	0	3	2	1	0	0	1	0	0	0	17	3.73798184017016e-05	0.979351	0.658931	0.000114237
3295	Glyma.05G127600	1	0	0	0	0	0	0	1	1	1	0	0	4	0	3	0	0	0	0	1	1	1	0	1	1	0	1	0	0	0	17	3.73798184017016e-05	0.979351	0.658931	0.000114237
3425	Glyma.05G190600	1	0	1	0	1	0	0	1	1	1	0	1	1	1	1	0	0	1	0	1	0	2	1	1	0	0	1	0	0	0	17	3.73798184017016e-05	0.979351	0.658931	0.000114237
3566	Glyma.05G230400	2	0	0	0	1	0	0	1	1	1	0	1	1	0	0	0	0	0	0	2	2	2	2	1	0	0	0	0	0	0	17	3.73798184017016e-05	0.979351	0.658931	0.000114237
3650	Glyma.06G039300	1	0	1	0	1	0	0	1	1	1	0	0	1	1	1	1	1	1	0	0	1	1	1	1	0	0	1	0	0	0	17	3.73798184017016e-05	0.979351	0.658931	0.000114237
3705	Glyma.06G084200	1	0	0	0	1	0	0	1	1	1	0	1	1	1	1	0	0	1	0	1	1	1	1	1	1	0	1	0	0	0	17	3.73798184017016e-05	0.979351	0.658931	0.000114237
3841	Glyma.06G172551	1	0	0	0	0	0	0	1	1	1	0	1	0	0	1	0	0	0	1	2	1	2	1	2	1	0	1	0	0	0	17	3.73798184017016e-05	0.979351	0.658931	0.000114237
3843	Glyma.06G176100	2	0	0	0	1	0	0	1	2	1	0	0	1	1	2	0	0	0	0	2	0	2	0	1	0	0	1	0	0	0	17	3.73798184017016e-05	0.979351	0.658931	0.000114237
3877	Glyma.06G186200	3	0	0	0	0	0	0	3	0	3	0	1	0	0	0	0	0	1	0	0	0	1	4	1	0	0	0	0	0	0	17	3.73798184017016e-05	0.979351	0.658931	0.000114237
3896	Glyma.06G193800	1	0	1	0	1	0	0	1	1	1	0	1	1	1	1	1	0	0	0	0	1	1	1	1	1	0	1	0	0	0	17	3.73798184017016e-05	0.979351	0.658931	0.000114237
3937	Glyma.06G202600	1	0	1	0	1	0	0	1	1	1	0	1	1	1	1	0	0	1	0	1	1	1	1	1	0	0	1	0	0	0	17	3.73798184017016e-05	0.979351	0.658931	0.000114237
4083	Glyma.06G229800	2	0	0	0	0	0	0	1	1	1	0	0	1	0	1	0	0	1	0	1	1	3	2	1	0	0	1	0	0	0	17	3.73798184017016e-05	0.979351	0.658931	0.000114237
4085	Glyma.06G230000	1	0	0	0	2	0	0	2	2	2	0	0	1	0	1	0	0	0	0	1	0	2	1	1	0	0	1	0	0	0	17	3.73798184017016e-05	0.979351	0.658931	0.000114237
4107	Glyma.06G236651	2	0	0	0	0	0	0	2	0	2	0	0	2	2	2	0	0	0	0	0	0	1	2	2	0	0	0	0	0	0	17	3.73798184017016e-05	0.979351	0.658931	0.000114237
4179	Glyma.06G261800	2	0	1	0	0	0	0	2	2	2	0	0	2	0	2	0	0	0	0	0	0	2	2	0	0	0	0	0	0	0	17	3.73798184017016e-05	0.979351	0.658931	0.000114237
4185	Glyma.06G262800	2	0	0	0	0	0	0	2	2	2	0	0	2	0	2	0	0	0	0	0	0	2	2	0	1	0	0	0	0	0	17	3.73798184017016e-05	0.979351	0.658931	0.000114237
4307	Glyma.06G289200	1	0	0	0	1	0	0	1	1	1	0	1	1	1	1	1	0	1	0	1	1	1	1	1	0	0	1	0	0	0	17	3.73798184017016e-05	0.979351	0.658931	0.000114237
4360	Glyma.06G299900	1	0	1	0	2	0	0	1	1	1	0	1	2	0	2	0	0	1	0	0	0	2	1	1	0	0	0	0	0	0	17	3.73798184017016e-05	0.979351	0.658931	0.000114237
4398	Glyma.06G313400	1	0	0	0	1	0	0	1	1	1	0	1	1	1	1	0	0	1	0	1	1	1	1	1	1	0	1	0	0	0	17	3.73798184017016e-05	0.979351	0.658931	0.000114237
4497	Glyma.07G036600	2	0	0	0	0	0	0	2	2	2	0	2	0	2	0	0	0	0	0	0	2	0	2	0	1	0	0	0	0	0	17	3.73798184017016e-05	0.979351	0.658931	0.000114237
4503	Glyma.07G038700	2	0	0	0	0	0	0	1	2	1	0	0	0	1	2	0	0	0	0	0	0	2	2	2	0	0	2	0	0	0	17	3.73798184017016e-05	0.979351	0.658931	0.000114237
4585	Glyma.07G082500	1	0	0	0	1	0	0	1	1	1	0	1	1	1	1	0	0	1	0	1	1	1	1	1	1	0	1	0	0	0	17	3.73798184017016e-05	0.979351	0.658931	0.000114237
4604	Glyma.07G087700	1	1	0	0	1	0	0	1	2	1	0	1	1	1	1	0	0	0	0	1	1	1	1	1	0	0	1	0	0	0	17	3.73798184017016e-05	0.979351	0.658931	0.000114237
4606	Glyma.07G088000	2	0	0	0	1	0	0	1	1	1	0	1	2	0	2	0	0	0	0	1	0	1	1	1	1	0	1	0	0	0	17	3.73798184017016e-05	0.979351	0.658931	0.000114237
4633	Glyma.07G095400	1	0	0	0	0	0	0	3	1	3	0	0	1	1	1	0	0	0	0	1	0	2	1	1	0	0	1	0	0	0	17	3.73798184017016e-05	0.979351	0.658931	0.000114237
4688	Glyma.07G118900	1	0	0	0	1	0	0	1	1	1	0	2	1	0	1	1	0	1	0	2	0	1	1	1	0	0	1	0	0	0	17	3.73798184017016e-05	0.979351	0.658931	0.000114237
4689	Glyma.07G119100	1	0	0	0	1	0	0	1	1	1	1	1	1	1	1	0	0	1	0	0	1	1	1	1	1	0	1	0	0	0	17	3.73798184017016e-05	0.979351	0.658931	0.000114237
4728	Glyma.07G130800	2	0	0	0	0	0	0	3	2	3	0	0	0	0	2	0	0	0	0	0	1	2	2	0	0	0	0	0	0	0	17	3.73798184017016e-05	0.979351	0.658931	0.000114237
4755	Glyma.07G139200	1	0	0	0	1	0	0	1	1	1	0	1	1	1	1	1	1	0	0	1	1	1	1	1	0	0	1	0	0	0	17	3.73798184017016e-05	0.979351	0.658931	0.000114237
4853	Glyma.07G165450	3	0	0	0	1	0	0	2	0	2	0	0	3	2	0	0	0	0	0	1	0	3	0	0	0	0	0	0	0	0	17	3.73798184017016e-05	0.979351	0.658931	0.000114237
4943	Glyma.07G191700	1	0	1	0	1	0	0	1	1	1	0	1	1	0	1	1	0	1	0	1	1	1	1	1	0	0	1	0	0	0	17	3.73798184017016e-05	0.979351	0.658931	0.000114237
4966	Glyma.07G198100	1	0	0	0	1	0	0	1	1	1	0	0	1	1	2	1	0	0	0	1	1	1	1	1	1	0	1	0	0	0	17	3.73798184017016e-05	0.979351	0.658931	0.000114237
4969	Glyma.07G199900	1	0	0	0	1	0	0	1	1	1	0	0	1	1	1	1	0	1	0	1	1	1	1	1	1	0	1	0	0	0	17	3.73798184017016e-05	0.979351	0.658931	0.000114237
4971	Glyma.07G200600	1	0	0	0	1	0	0	1	1	1	0	1	1	1	1	0	0	1	0	1	1	1	1	1	1	0	1	0	0	0	17	3.73798184017016e-05	0.979351	0.658931	0.000114237
5050	Glyma.07G228700	2	0	0	0	0	0	0	2	2	2	0	0	2	0	2	0	0	1	0	0	0	2	1	0	0	0	1	0	0	0	17	3.73798184017016e-05	0.979351	0.658931	0.000114237
5092	Glyma.08G004200	1	0	1	0	1	0	0	1	1	1	0	0	1	1	1	0	0	1	0	1	1	2	1	0	1	0	1	0	0	0	17	3.73798184017016e-05	0.979351	0.658931	0.000114237
5119	Glyma.08G019500	1	0	0	0	1	0	0	1	1	1	0	1	1	1	1	1	1	0	0	1	1	1	0	1	1	0	1	0	0	0	17	3.73798184017016e-05	0.979351	0.658931	0.000114237
5161	Glyma.08G037000	1	0	0	0	2	0	0	2	0	2	0	0	0	0	2	0	0	0	0	0	0	2	2	2	2	0	0	0	0	0	17	3.73798184017016e-05	0.979351	0.658931	0.000114237
5209	Glyma.08G085600	1	0	1	0	1	0	0	1	1	1	0	0	1	1	1	0	0	1	0	1	1	1	1	1	1	0	1	0	0	0	17	3.73798184017016e-05	0.979351	0.658931	0.000114237
5261	Glyma.08G126100	1	0	0	0	1	0	0	2	0	2	0	0	0	0	1	1	0	0	0	1	0	1	2	2	1	0	2	0	0	0	17	3.73798184017016e-05	0.979351	0.658931	0.000114237
5404	Glyma.08G226800	1	0	1	0	1	0	0	1	1	1	0	1	1	1	1	1	0	0	0	1	1	1	1	1	0	0	1	0	0	0	17	3.73798184017016e-05	0.979351	0.658931	0.000114237
5411	Glyma.08G229700	3	0	0	0	1	0	0	0	0	0	0	0	3	0	3	0	0	0	0	0	0	3	2	1	0	0	1	0	0	0	17	3.73798184017016e-05	0.979351	0.658931	0.000114237
5608	Glyma.08G299500	1	0	1	0	1	0	0	1	1	1	0	0	1	2	2	0	0	0	0	1	1	1	1	1	0	0	1	0	0	0	17	3.73798184017016e-05	0.979351	0.658931	0.000114237
5637	Glyma.08G307500	2	0	1	0	0	0	0	0	0	0	0	1	0	1	2	1	0	0	1	1	0	2	2	1	0	0	2	0	0	0	17	3.73798184017016e-05	0.979351	0.658931	0.000114237
5695	Glyma.08G321100	1	0	0	0	1	0	0	1	0	1	0	1	1	0	2	2	0	1	0	0	0	2	1	2	0	0	1	0	0	0	17	3.73798184017016e-05	0.979351	0.658931	0.000114237
5774	Glyma.08G357100	2	0	0	0	1	0	0	1	1	1	0	0	1	0	2	0	0	0	0	0	1	2	2	2	0	0	1	0	0	0	17	3.73798184017016e-05	0.979351	0.658931	0.000114237
5843	Glyma.09G022100	1	0	1	0	0	0	0	1	1	1	0	1	1	1	1	1	0	1	0	1	0	1	1	1	1	0	1	0	0	0	17	3.73798184017016e-05	0.979351	0.658931	0.000114237
5943	Glyma.09G063000	1	0	1	0	1	0	0	1	1	1	0	1	0	0	1	0	0	1	0	0	2	1	2	1	1	0	1	0	0	0	17	3.73798184017016e-05	0.979351	0.658931	0.000114237
6025	Glyma.09G085400	1	0	0	0	1	0	0	2	2	2	0	1	0	1	1	0	0	0	0	1	1	2	1	0	0	0	1	0	0	0	17	3.73798184017016e-05	0.979351	0.658931	0.000114237
6058	Glyma.09G096400	2	0	1	0	0	0	0	0	2	0	0	0	2	1	2	0	0	0	0	0	0	2	2	3	0	0	0	0	0	0	17	3.73798184017016e-05	0.979351	0.658931	0.000114237
6081	Glyma.09G103500	2	0	0	0	1	0	0	2	1	2	0	0	1	0	1	0	0	0	0	0	0	2	3	0	0	0	2	0	0	0	17	3.73798184017016e-05	0.979351	0.658931	0.000114237
6110	Glyma.09G111500	1	0	0	0	1	0	0	2	1	2	0	0	1	1	1	0	0	1	0	1	1	2	1	0	0	0	1	0	0	0	17	3.73798184017016e-05	0.979351	0.658931	0.000114237
6232	Glyma.09G151251	1	0	0	0	2	0	0	2	2	2	0	1	2	1	0	0	0	0	0	0	0	2	1	1	0	0	0	0	0	0	17	3.73798184017016e-05	0.979351	0.658931	0.000114237
6250	Glyma.09G159300	1	0	0	0	0	0	0	0	1	0	0	0	1	0	6	4	0	0	0	1	1	0	1	0	0	0	1	0	0	0	17	3.73798184017016e-05	0.979351	0.658931	0.000114237
6369	Glyma.09G195900	1	0	0	0	1	0	0	1	1	1	0	1	1	1	1	0	0	1	0	1	1	1	1	1	1	0	1	0	0	0	17	3.73798184017016e-05	0.979351	0.658931	0.000114237
6402	Glyma.09G205800	1	0	1	0	1	0	0	1	1	1	0	0	1	1	1	1	0	1	0	1	1	1	1	1	0	0	1	0	0	0	17	3.73798184017016e-05	0.979351	0.658931	0.000114237
6447	Glyma.09G218000	2	0	0	0	1	0	0	1	1	1	0	0	1	1	2	0	0	0	0	1	0	2	2	1	0	0	1	0	0	0	17	3.73798184017016e-05	0.979351	0.658931	0.000114237
6448	Glyma.09G218100	3	0	0	0	0	0	0	0	0	0	0	0	0	0	3	1	0	0	0	1	0	2	2	2	3	0	0	0	0	0	17	3.73798184017016e-05	0.979351	0.658931	0.000114237
6544	Glyma.09G249700	1	0	0	0	2	0	0	1	2	1	0	0	1	1	1	1	0	0	0	0	2	2	1	1	0	0	0	0	0	0	17	3.73798184017016e-05	0.979351	0.658931	0.000114237
6603	Glyma.09G280200	2	0	1	0	0	0	0	2	2	2	0	0	0	0	2	0	0	0	0	2	2	0	0	0	0	0	2	0	0	0	17	3.73798184017016e-05	0.979351	0.658931	0.000114237
6661	Glyma.10G034351	1	0	1	0	0	0	0	1	1	1	0	1	1	1	2	1	0	1	0	0	1	1	1	0	1	0	1	0	0	0	17	3.73798184017016e-05	0.979351	0.658931	0.000114237
6669	Glyma.10G036700	1	0	0	0	1	0	0	1	1	1	0	1	1	1	1	1	0	1	0	1	1	1	1	1	0	0	1	0	0	0	17	3.73798184017016e-05	0.979351	0.658931	0.000114237
6777	Glyma.10G081900	2	0	0	0	1	0	0	1	1	1	0	0	2	0	3	0	0	0	0	0	0	2	2	1	0	0	1	0	0	0	17	3.73798184017016e-05	0.979351	0.658931	0.000114237
6827	Glyma.10G093100	2	0	0	0	1	0	0	1	3	1	0	1	1	0	1	0	0	0	0	0	1	2	2	0	0	0	1	0	0	0	17	3.73798184017016e-05	0.979351	0.658931	0.000114237
7005	Glyma.10G130350	4	0	0	0	0	0	0	0	0	0	0	0	0	0	0	0	0	0	0	0	1	0	4	4	0	0	4	0	0	0	17	3.73798184017016e-05	0.979351	0.658931	0.000114237
7127	Glyma.10G185100	1	0	0	0	1	0	0	2	1	2	0	0	1	1	1	0	0	0	0	1	2	1	1	1	0	0	1	0	0	0	17	3.73798184017016e-05	0.979351	0.658931	0.000114237
7128	Glyma.10G185900	1	0	0	0	1	0	0	1	1	1	0	0	1	1	1	1	0	1	0	1	1	1	1	1	1	0	1	0	0	0	17	3.73798184017016e-05	0.979351	0.658931	0.000114237
7134	Glyma.10G187650	1	0	0	0	1	0	0	1	1	1	0	0	1	1	2	0	0	1	0	1	1	2	1	1	0	0	1	0	0	0	17	3.73798184017016e-05	0.979351	0.658931	0.000114237
7217	Glyma.10G232000	1	0	1	0	1	0	0	1	1	1	0	0	1	1	1	1	0	0	0	1	1	1	1	1	0	0	2	0	0	0	17	3.73798184017016e-05	0.979351	0.658931	0.000114237
7233	Glyma.10G237900	2	0	0	0	2	0	0	2	0	2	0	1	0	0	0	0	0	0	0	1	0	2	2	2	1	0	0	0	0	0	17	3.73798184017016e-05	0.979351	0.658931	0.000114237
7236	Glyma.10G238300	1	0	0	0	1	0	0	1	1	1	0	1	0	0	2	0	0	2	0	1	1	1	1	1	0	0	2	0	0	0	17	3.73798184017016e-05	0.979351	0.658931	0.000114237
7256	Glyma.10G247400	1	0	0	0	1	0	0	1	1	1	0	1	1	1	1	0	1	0	0	1	1	1	1	1	0	1	1	0	0	0	17	3.73798184017016e-05	0.979351	0.658931	0.000114237
7347	Glyma.11G017300	2	0	2	0	0	0	0	2	2	2	0	0	0	0	2	0	0	0	0	1	2	2	0	0	0	0	0	0	0	0	17	3.73798184017016e-05	0.979351	0.658931	0.000114237
7382	Glyma.11G042000	1	0	0	0	1	0	0	1	1	1	0	1	1	1	1	0	0	1	0	1	1	1	1	1	1	0	1	0	0	0	17	3.73798184017016e-05	0.979351	0.658931	0.000114237
7446	Glyma.11G090100	2	0	1	0	0	0	0	2	2	2	0	0	2	0	2	1	1	0	0	0	0	2	0	0	0	0	0	0	0	0	17	3.73798184017016e-05	0.979351	0.658931	0.000114237
7620	Glyma.11G165710	1	0	0	0	2	0	0	1	1	1	0	2	2	0	1	0	0	0	0	0	0	1	2	1	0	0	2	0	0	0	17	3.73798184017016e-05	0.979351	0.658931	0.000114237
7624	Glyma.11G166337	3	0	0	0	2	0	0	1	2	1	0	0	2	0	2	0	0	0	0	0	0	2	2	0	0	0	0	0	0	0	17	3.73798184017016e-05	0.979351	0.658931	0.000114237
7673	Glyma.11G176373	1	0	0	0	1	0	0	1	1	1	0	1	1	1	1	0	0	0	0	0	0	1	4	1	2	0	0	0	0	0	17	3.73798184017016e-05	0.979351	0.658931	0.000114237
7940	Glyma.12G054300	1	0	1	0	1	0	0	1	1	1	0	1	1	1	1	1	0	1	0	1	1	1	1	0	0	0	1	0	0	0	17	3.73798184017016e-05	0.979351	0.658931	0.000114237
7942	Glyma.12G055500	2	0	0	0	1	0	0	1	1	1	0	0	2	0	2	0	0	1	0	1	1	1	1	0	1	0	1	0	0	0	17	3.73798184017016e-05	0.979351	0.658931	0.000114237
7961	Glyma.12G076800	1	0	1	0	1	0	0	1	1	1	0	1	1	1	1	0	0	1	0	1	1	1	1	1	0	0	1	0	0	0	17	3.73798184017016e-05	0.979351	0.658931	0.000114237
7978	Glyma.12G086700	1	0	1	0	1	0	0	1	1	1	0	1	1	1	1	0	0	1	0	1	0	1	1	1	1	0	1	0	0	0	17	3.73798184017016e-05	0.979351	0.658931	0.000114237
8108	Glyma.12G140100	1	0	0	0	1	0	0	0	3	0	0	0	2	1	2	0	0	0	0	1	0	2	1	1	0	0	2	0	0	0	17	3.73798184017016e-05	0.979351	0.658931	0.000114237
8250	Glyma.12G193500	1	0	0	0	1	0	0	1	1	1	0	0	1	0	1	0	0	0	0	1	1	2	2	1	2	0	1	0	0	0	17	3.73798184017016e-05	0.979351	0.658931	0.000114237
8396	Glyma.13G006500	1	0	0	0	1	0	0	0	3	0	0	0	1	1	1	1	0	0	0	1	0	1	1	3	1	0	1	0	0	0	17	3.73798184017016e-05	0.979351	0.658931	0.000114237
8466	Glyma.13G033951	2	0	0	0	1	0	0	1	3	1	0	1	1	0	1	0	0	0	0	0	0	1	4	0	0	0	1	0	0	0	17	3.73798184017016e-05	0.979351	0.658931	0.000114237
8512	Glyma.13G049500	1	0	0	0	0	0	0	0	2	0	0	2	0	0	2	0	0	0	0	1	1	2	2	2	0	0	2	0	0	0	17	3.73798184017016e-05	0.979351	0.658931	0.000114237
8570	Glyma.13G061900	1	0	1	0	1	0	0	1	1	1	0	0	1	0	1	1	0	0	1	1	1	1	1	1	1	0	1	0	0	0	17	3.73798184017016e-05	0.979351	0.658931	0.000114237
8572	Glyma.13G062300	1	0	0	0	1	0	0	1	1	1	1	1	1	1	1	0	0	0	0	1	1	2	1	1	0	0	1	0	0	0	17	3.73798184017016e-05	0.979351	0.658931	0.000114237
8630	Glyma.13G082300	1	0	0	0	1	0	0	1	1	1	0	1	1	1	1	1	0	1	0	1	1	1	1	1	0	0	1	0	0	0	17	3.73798184017016e-05	0.979351	0.658931	0.000114237
8791	Glyma.13G157400	1	0	1	0	1	0	0	1	1	1	0	1	1	1	1	0	0	1	0	1	1	1	0	1	1	0	1	0	0	0	17	3.73798184017016e-05	0.979351	0.658931	0.000114237
8792	Glyma.13G157500	1	0	1	0	1	0	0	1	1	1	0	0	1	1	1	1	0	1	0	1	1	1	0	1	1	0	1	0	0	0	17	3.73798184017016e-05	0.979351	0.658931	0.000114237
8801	Glyma.13G163000	1	0	0	0	1	0	0	1	1	1	0	1	1	1	1	1	0	0	0	1	1	1	2	0	1	0	1	0	0	0	17	3.73798184017016e-05	0.979351	0.658931	0.000114237
8889	Glyma.13G185400	2	0	0	0	0	0	0	0	2	0	0	0	1	1	2	0	0	0	0	1	2	1	2	1	1	0	1	0	0	0	17	3.73798184017016e-05	0.979351	0.658931	0.000114237
8894	Glyma.13G187000	2	0	0	0	0	0	0	0	2	0	0	0	2	2	2	0	0	0	0	1	2	1	2	0	0	0	1	0	0	0	17	3.73798184017016e-05	0.979351	0.658931	0.000114237
8895	Glyma.13G187100	2	0	1	0	0	0	0	0	2	0	0	0	1	1	2	0	0	0	0	1	2	1	2	0	1	0	1	0	0	0	17	3.73798184017016e-05	0.979351	0.658931	0.000114237
8901	Glyma.13G188400	3	0	0	0	0	0	0	0	2	0	0	0	3	3	2	0	0	0	0	0	1	1	1	0	0	0	1	0	0	0	17	3.73798184017016e-05	0.979351	0.658931	0.000114237
8909	Glyma.13G191900	1	0	1	0	0	0	0	1	1	1	0	0	1	1	1	1	0	1	0	1	1	1	1	1	1	0	1	0	0	0	17	3.73798184017016e-05	0.979351	0.658931	0.000114237
8917	Glyma.13G193300	1	0	0	0	0	0	0	2	1	2	0	0	1	1	1	0	0	0	0	1	1	2	1	0	1	0	2	0	0	0	17	3.73798184017016e-05	0.979351	0.658931	0.000114237
8957	Glyma.13G200800	1	0	0	0	1	0	0	1	1	1	1	1	1	1	1	0	0	0	0	1	1	1	1	1	1	0	1	0	0	0	17	3.73798184017016e-05	0.979351	0.658931	0.000114237
8980	Glyma.13G206600	1	0	1	0	1	0	0	1	1	1	0	1	1	0	1	1	0	1	0	1	1	1	1	1	0	0	1	0	0	0	17	3.73798184017016e-05	0.979351	0.658931	0.000114237
9017	Glyma.13G217301	1	0	0	0	1	0	0	1	1	1	0	1	1	1	1	0	0	1	0	1	1	1	1	1	1	0	1	0	0	0	17	3.73798184017016e-05	0.979351	0.658931	0.000114237
9028	Glyma.13G219500	2	0	1	0	0	0	0	2	0	2	0	1	2	0	0	0	0	0	0	2	0	2	2	0	1	0	0	0	0	0	17	3.73798184017016e-05	0.979351	0.658931	0.000114237
9102	Glyma.13G256700	1	0	1	0	1	0	0	1	1	1	0	1	1	0	1	1	0	1	0	1	1	1	1	1	0	0	1	0	0	0	17	3.73798184017016e-05	0.979351	0.658931	0.000114237
9107	Glyma.13G258500	1	0	1	0	1	0	0	1	1	1	0	1	1	0	1	0	0	1	0	1	1	1	1	1	1	0	1	0	0	0	17	3.73798184017016e-05	0.979351	0.658931	0.000114237
9109	Glyma.13G259100	1	0	0	0	1	0	0	1	1	1	0	1	1	0	2	0	0	1	0	1	1	1	1	2	0	0	1	0	0	0	17	3.73798184017016e-05	0.979351	0.658931	0.000114237
9114	Glyma.13G261400	1	0	1	0	1	0	0	1	1	1	0	1	1	1	1	0	0	1	0	1	1	1	1	1	0	0	1	0	0	0	17	3.73798184017016e-05	0.979351	0.658931	0.000114237
9200	Glyma.13G307900	1	0	0	0	1	0	0	1	1	1	0	1	1	1	1	1	0	1	0	1	1	1	1	1	0	0	1	0	0	0	17	3.73798184017016e-05	0.979351	0.658931	0.000114237
9464	Glyma.14G076300	3	0	0	0	0	0	0	0	0	0	0	0	3	0	3	0	0	0	0	0	0	3	3	2	0	0	0	0	0	0	17	3.73798184017016e-05	0.979351	0.658931	0.000114237
9589	Glyma.14G119500	2	0	0	0	1	0	0	1	2	1	0	0	1	0	2	0	0	0	0	0	0	2	2	2	0	0	1	0	0	0	17	3.73798184017016e-05	0.979351	0.658931	0.000114237
9613	Glyma.14G127400	2	0	0	0	0	0	0	3	1	3	0	0	1	1	1	0	0	0	0	0	1	1	1	0	1	0	1	0	0	0	17	3.73798184017016e-05	0.979351	0.658931	0.000114237
9737	Glyma.14G164700	1	0	0	0	0	0	0	2	1	2	0	0	1	1	4	0	0	1	0	1	0	1	1	1	0	0	0	0	0	0	17	3.73798184017016e-05	0.979351	0.658931	0.000114237
9830	Glyma.14G211100	2	0	0	0	1	0	0	2	0	2	0	0	0	2	2	0	0	0	0	1	1	2	0	0	0	0	2	0	0	0	17	3.73798184017016e-05	0.979351	0.658931	0.000114237
9837	Glyma.14G212600	3	0	0	0	0	0	0	2	1	2	0	0	0	1	1	0	0	0	0	0	2	2	0	0	0	0	3	0	0	0	17	3.73798184017016e-05	0.979351	0.658931	0.000114237
9876	Glyma.15G012200	2	0	0	0	0	0	0	2	2	2	0	1	2	1	0	0	0	0	0	0	0	1	2	0	0	0	2	0	0	0	17	3.73798184017016e-05	0.979351	0.658931	0.000114237
9882	Glyma.15G013300	1	0	1	0	1	0	0	1	1	1	0	0	1	1	2	0	0	1	0	1	1	1	1	1	0	0	1	0	0	0	17	3.73798184017016e-05	0.979351	0.658931	0.000114237
9888	Glyma.15G021800	1	0	0	0	1	0	0	1	1	1	0	0	1	1	3	0	0	1	0	0	1	2	2	1	0	0	0	0	0	0	17	3.73798184017016e-05	0.979351	0.658931	0.000114237
9919	Glyma.15G054200	1	0	0	0	1	0	0	1	1	1	0	1	1	1	1	0	0	1	0	1	1	1	1	1	1	0	1	0	0	0	17	3.73798184017016e-05	0.979351	0.658931	0.000114237
10000	Glyma.15G109200	1	0	1	0	1	0	0	1	1	1	0	1	1	1	1	1	0	0	0	1	1	1	1	1	0	0	1	0	0	0	17	3.73798184017016e-05	0.979351	0.658931	0.000114237
10003	Glyma.15G110300	1	0	0	0	1	0	0	1	1	1	0	0	1	1	2	1	0	0	0	1	1	1	1	1	1	0	1	0	0	0	17	3.73798184017016e-05	0.979351	0.658931	0.000114237
10047	Glyma.15G121000	1	0	1	0	0	0	0	1	1	1	0	0	2	2	1	0	0	0	0	1	1	1	1	1	0	0	2	0	0	0	17	3.73798184017016e-05	0.979351	0.658931	0.000114237
10101	Glyma.15G138000	1	0	1	0	1	0	0	1	1	1	0	0	1	1	2	1	0	1	0	1	1	1	1	0	0	0	1	0	0	0	17	3.73798184017016e-05	0.979351	0.658931	0.000114237
10168	Glyma.15G159100	1	0	0	0	1	0	0	1	1	1	0	1	1	1	1	1	0	0	0	1	1	2	1	1	0	0	1	0	0	0	17	3.73798184017016e-05	0.979351	0.658931	0.000114237
10347	Glyma.15G206900	2	0	0	0	1	0	0	2	2	2	0	0	2	1	1	0	0	0	0	0	0	2	1	1	0	0	0	0	0	0	17	3.73798184017016e-05	0.979351	0.658931	0.000114237
10517	Glyma.15G255300	2	0	1	0	0	0	0	2	0	2	0	0	0	2	0	0	0	0	0	2	0	2	1	1	0	0	2	0	0	0	17	3.73798184017016e-05	0.979351	0.658931	0.000114237
10693	Glyma.16G043300	2	0	0	0	0	0	0	1	1	1	0	0	1	1	2	0	0	1	0	0	1	1	1	1	1	0	2	0	0	0	17	3.73798184017016e-05	0.979351	0.658931	0.000114237
10705	Glyma.16G045900	1	0	0	0	1	0	0	1	1	1	0	0	2	1	2	0	0	0	0	1	0	1	2	2	0	0	1	0	0	0	17	3.73798184017016e-05	0.979351	0.658931	0.000114237
10732	Glyma.16G051400	1	0	1	0	1	0	0	1	1	1	0	0	1	0	1	0	0	1	0	2	0	2	1	1	1	0	1	0	0	0	17	3.73798184017016e-05	0.979351	0.658931	0.000114237
10784	Glyma.16G064100	1	0	0	0	1	0	0	1	1	1	0	1	1	1	1	0	0	0	0	1	1	2	1	1	1	0	1	0	0	0	17	3.73798184017016e-05	0.979351	0.658931	0.000114237
11056	Glyma.16G127200	2	0	0	0	2	0	0	0	0	0	0	0	2	0	0	1	0	0	0	2	0	2	2	2	2	0	0	0	0	0	17	3.73798184017016e-05	0.979351	0.658931	0.000114237
11067	Glyma.16G134600	1	0	0	0	1	0	0	1	1	1	0	0	1	0	0	0	0	1	0	1	1	2	1	2	2	0	1	0	0	0	17	3.73798184017016e-05	0.979351	0.658931	0.000114237
11246	Glyma.16G175400	2	0	1	0	1	0	0	0	1	0	0	0	1	1	1	0	0	0	0	1	1	2	2	2	0	0	1	0	0	0	17	3.73798184017016e-05	0.979351	0.658931	0.000114237
11270	Glyma.16G185500	1	0	0	0	0	0	0	4	0	4	0	0	0	0	2	0	0	0	0	1	0	2	1	1	1	0	0	0	0	0	17	3.73798184017016e-05	0.979351	0.658931	0.000114237
11457	Glyma.17G106200	1	0	0	0	1	0	0	1	1	1	0	1	1	1	1	0	0	1	0	1	1	1	1	1	1	0	1	0	0	0	17	3.73798184017016e-05	0.979351	0.658931	0.000114237
11471	Glyma.17G129900	1	0	1	0	1	0	0	1	1	1	0	0	1	1	1	1	0	1	0	1	1	1	1	1	0	0	1	0	0	0	17	3.73798184017016e-05	0.979351	0.658931	0.000114237
11515	Glyma.17G153250	1	0	0	0	1	0	0	2	1	2	0	1	0	0	2	1	0	0	0	1	1	1	1	1	0	0	1	0	0	0	17	3.73798184017016e-05	0.979351	0.658931	0.000114237
11549	Glyma.17G164500	1	0	0	0	1	0	0	2	1	2	0	1	1	1	1	0	0	0	0	1	1	1	1	1	0	0	1	0	0	0	17	3.73798184017016e-05	0.979351	0.658931	0.000114237
11586	Glyma.17G177000	3	0	0	0	0	0	0	3	0	3	0	1	0	0	3	0	0	0	0	0	0	0	2	1	0	0	1	0	0	0	17	3.73798184017016e-05	0.979351	0.658931	0.000114237
11812	Glyma.17G233400	1	0	0	0	2	0	0	1	3	1	0	0	1	0	1	2	0	0	0	0	2	1	1	1	0	0	0	0	0	0	17	3.73798184017016e-05	0.979351	0.658931	0.000114237
11837	Glyma.17G240300	2	0	0	0	0	0	0	1	1	1	0	0	1	0	3	0	0	1	0	1	1	2	1	1	0	0	1	0	0	0	17	3.73798184017016e-05	0.979351	0.658931	0.000114237
11858	Glyma.17G259600	1	0	0	0	1	0	0	1	1	1	0	1	1	1	1	1	1	0	0	1	1	1	1	0	1	0	1	0	0	0	17	3.73798184017016e-05	0.979351	0.658931	0.000114237
11979	Glyma.18G055700	1	0	0	0	1	0	0	1	1	1	1	1	1	0	1	1	0	0	0	1	1	1	1	1	1	0	1	0	0	0	17	3.73798184017016e-05	0.979351	0.658931	0.000114237
12027	Glyma.18G072600	1	0	0	0	2	0	0	0	2	0	0	2	2	2	0	0	0	0	1	0	2	2	0	0	1	0	0	0	0	0	17	3.73798184017016e-05	0.979351	0.658931	0.000114237
12230	Glyma.18G129800	6	0	0	0	0	0	0	5	0	5	0	0	0	0	1	0	0	0	0	0	0	0	0	0	0	0	0	0	0	0	17	3.73798184017016e-05	0.979351	0.658931	0.000114237
12324	Glyma.18G148000	2	0	0	0	0	0	0	1	1	1	0	0	2	1	2	0	0	0	0	1	1	2	1	1	0	0	1	0	0	0	17	3.73798184017016e-05	0.979351	0.658931	0.000114237
12386	Glyma.18G157500	3	0	0	0	2	0	0	0	2	0	0	1	1	2	1	0	0	0	0	0	0	2	1	0	1	0	1	0	0	0	17	3.73798184017016e-05	0.979351	0.658931	0.000114237
12486	Glyma.18G182000	1	0	1	0	1	0	0	1	1	1	0	0	2	1	2	0	0	0	0	0	1	1	1	1	1	0	1	0	0	0	17	3.73798184017016e-05	0.979351	0.658931	0.000114237
12524	Glyma.18G188900	4	0	0	0	3	0	0	0	0	0	0	0	4	0	0	0	0	0	0	1	1	4	0	0	0	0	0	0	0	0	17	3.73798184017016e-05	0.979351	0.658931	0.000114237
12529	Glyma.18G189700	4	0	0	0	2	0	0	0	0	0	0	0	2	0	5	0	0	0	0	2	0	2	0	0	0	0	0	0	0	0	17	3.73798184017016e-05	0.979351	0.658931	0.000114237
12543	Glyma.18G191900	2	0	0	0	3	0	0	0	0	0	0	0	4	0	4	0	0	0	0	0	0	2	0	0	2	0	0	0	0	0	17	3.73798184017016e-05	0.979351	0.658931	0.000114237
12624	Glyma.18G204750	3	0	2	0	0	0	0	0	0	0	0	2	0	0	4	0	0	0	0	0	1	3	0	0	2	0	0	0	0	0	17	3.73798184017016e-05	0.979351	0.658931	0.000114237
12643	Glyma.18G208000	2	0	0	0	1	0	0	1	1	1	0	1	1	1	1	0	0	1	0	1	0	1	1	1	1	0	1	0	0	0	17	3.73798184017016e-05	0.979351	0.658931	0.000114237
12664	Glyma.18G220100	2	0	0	0	0	0	0	1	0	1	0	0	1	0	2	1	1	1	0	1	1	2	1	1	0	0	1	0	0	0	17	3.73798184017016e-05	0.979351	0.658931	0.000114237
12673	Glyma.18G223200	1	0	1	0	0	0	0	2	0	2	0	1	0	2	1	0	0	0	0	1	1	2	1	0	0	0	2	0	0	0	17	3.73798184017016e-05	0.979351	0.658931	0.000114237
12761	Glyma.18G238600	2	1	1	0	0	0	0	1	1	1	0	1	0	1	1	0	0	0	0	1	1	1	1	1	0	0	2	0	0	0	17	3.73798184017016e-05	0.979351	0.658931	0.000114237
12775	Glyma.18G241400	1	0	1	0	0	0	0	1	1	1	0	0	0	1	1	1	0	1	1	1	1	1	1	1	1	0	1	0	0	0	17	3.73798184017016e-05	0.979351	0.658931	0.000114237
12802	Glyma.18G247650	3	0	0	0	0	0	0	3	0	3	0	0	0	0	3	0	0	0	0	2	0	0	3	0	0	0	0	0	0	0	17	3.73798184017016e-05	0.979351	0.658931	0.000114237
12821	Glyma.18G251850	1	0	1	0	1	0	0	1	2	1	0	1	1	1	2	1	0	1	0	0	0	0	1	1	0	0	1	0	0	0	17	3.73798184017016e-05	0.979351	0.658931	0.000114237
12842	Glyma.18G256500	3	0	0	0	1	0	0	1	2	1	0	1	1	1	1	0	0	1	0	0	1	1	0	1	0	0	1	0	0	0	17	3.73798184017016e-05	0.979351	0.658931	0.000114237
12947	Glyma.19G000100	2	0	0	0	1	0	0	2	2	2	0	0	2	0	2	0	0	0	0	0	0	2	1	0	0	0	1	0	0	0	17	3.73798184017016e-05	0.979351	0.658931	0.000114237
13093	Glyma.19G053300	3	0	0	0	1	0	0	1	2	1	0	2	1	0	1	0	0	0	0	1	0	3	0	0	0	0	1	0	0	0	17	3.73798184017016e-05	0.979351	0.658931	0.000114237
13227	Glyma.19G075600	2	0	0	0	0	0	0	0	2	0	0	0	2	0	2	0	0	0	0	2	1	2	2	1	0	0	1	0	0	0	17	3.73798184017016e-05	0.979351	0.658931	0.000114237
13302	Glyma.19G101700	1	0	0	0	1	0	0	1	1	1	0	0	1	0	1	0	0	0	0	2	1	1	3	1	1	0	1	0	0	0	17	3.73798184017016e-05	0.979351	0.658931	0.000114237
13312	Glyma.19G104300	3	0	1	0	0	0	0	0	0	0	0	0	0	0	3	1	0	0	0	0	0	1	3	3	0	0	2	0	0	0	17	3.73798184017016e-05	0.979351	0.658931	0.000114237
13548	Glyma.19G200200	3	0	0	0	0	0	0	0	0	0	0	0	0	0	2	0	0	0	0	1	0	3	3	2	0	0	3	0	0	0	17	3.73798184017016e-05	0.979351	0.658931	0.000114237
13777	Glyma.20G037300	2	0	0	0	1	0	0	2	2	2	0	0	2	1	1	0	0	0	0	0	0	2	1	0	0	0	1	0	0	0	17	3.73798184017016e-05	0.979351	0.658931	0.000114237
13824	Glyma.20G051000	2	0	0	0	1	0	0	1	1	1	0	0	1	1	1	0	0	0	0	1	0	4	1	1	0	0	1	0	0	0	17	3.73798184017016e-05	0.979351	0.658931	0.000114237
13913	Glyma.20G074400	2	0	0	0	2	0	0	1	2	1	0	0	1	0	1	0	0	0	0	1	0	3	2	1	0	0	0	0	0	0	17	3.73798184017016e-05	0.979351	0.658931	0.000114237
13934	Glyma.20G077700	1	0	1	0	1	0	0	2	1	2	0	0	2	1	1	0	0	0	0	1	0	1	1	1	0	0	1	0	0	0	17	3.73798184017016e-05	0.979351	0.658931	0.000114237
14152	Glyma.20G165700	2	0	0	0	2	0	0	1	1	1	0	0	2	0	1	0	0	0	0	0	0	1	2	1	1	1	1	0	0	0	17	3.73798184017016e-05	0.979351	0.658931	0.000114237
14488	Glyma.04G141300	0	0	1	0	0	0	0	0	3	0	0	0	0	2	3	0	0	0	3	1	1	3	0	0	0	0	0	0	0	0	17	3.73798184017016e-05	0.979351	0.658931	0.000114237
14626	Glyma.12G130200	0	0	1	0	3	0	0	0	1	0	0	0	4	1	3	0	0	0	0	2	0	1	0	0	0	0	1	0	0	0	17	3.73798184017016e-05	0.979351	0.658931	0.000114237
14680	Glyma.14G172700	0	0	1	0	0	0	0	0	0	0	0	0	0	0	4	0	0	3	0	0	0	1	2	2	0	0	4	0	0	0	17	3.73798184017016e-05	0.979351	0.658931	0.000114237
14700	Glyma.15G032400	0	0	2	0	2	0	0	0	0	0	0	0	2	0	2	0	0	2	0	0	0	2	3	2	0	0	0	0	0	0	17	3.73798184017016e-05	0.979351	0.658931	0.000114237
14850	Glyma.11G168010	0	0	0	2	1	0	0	1	2	1	0	1	2	1	0	2	1	0	0	1	1	1	0	0	0	0	0	0	0	0	17	3.73798184017016e-05	0.979351	0.658931	0.000114237
14869	Glyma.16G148500	0	0	0	1	0	0	0	0	0	0	0	0	0	0	3	1	0	0	0	2	3	3	2	2	0	0	0	0	0	0	17	3.73798184017016e-05	0.979351	0.658931	0.000114237
14930	Glyma.01G165800	0	0	0	0	1	0	4	1	1	1	0	1	1	1	4	0	0	0	0	0	0	1	0	0	0	0	1	0	0	0	17	3.73798184017016e-05	0.979351	0.658931	0.000114237
15011	Glyma.02G157900	0	0	0	0	2	0	0	2	2	2	0	0	2	0	2	0	0	0	0	2	0	0	2	0	0	0	1	0	0	0	17	3.73798184017016e-05	0.979351	0.658931	0.000114237
15036	Glyma.02G210933	0	0	0	0	1	0	0	2	2	2	0	1	2	0	1	0	0	0	0	0	2	0	1	1	0	0	2	0	0	0	17	3.73798184017016e-05	0.979351	0.658931	0.000114237
15214	Glyma.04G185000	0	0	0	0	1	0	0	1	3	1	0	2	1	1	0	0	0	1	0	0	2	0	1	1	1	0	1	0	0	0	17	3.73798184017016e-05	0.979351	0.658931	0.000114237
15472	Glyma.06G243900	0	0	0	0	2	0	0	3	1	3	0	0	3	1	0	0	0	0	0	0	1	2	0	0	0	0	1	0	0	0	17	3.73798184017016e-05	0.979351	0.658931	0.000114237
15483	Glyma.06G248900	0	0	0	0	2	0	0	3	3	3	0	0	4	0	0	0	0	0	0	0	0	2	0	0	0	0	0	0	0	0	17	3.73798184017016e-05	0.979351	0.658931	0.000114237
15568	Glyma.07G072300	0	0	0	0	1	0	0	2	0	2	0	0	0	0	2	1	2	0	0	1	0	2	2	2	0	0	0	0	0	0	17	3.73798184017016e-05	0.979351	0.658931	0.000114237
15662	Glyma.07G200500	0	0	0	0	2	0	0	2	2	2	0	0	1	0	2	0	0	0	0	1	0	2	0	1	0	0	2	0	0	0	17	3.73798184017016e-05	0.979351	0.658931	0.000114237
15776	Glyma.08G305500	0	0	0	0	1	0	0	1	1	1	1	0	1	1	3	1	0	1	0	1	1	1	0	0	1	0	1	0	0	0	17	3.73798184017016e-05	0.979351	0.658931	0.000114237
15896	Glyma.09G167900	0	0	0	0	2	0	0	2	2	2	0	0	2	2	0	0	0	0	0	0	0	2	1	0	0	0	2	0	0	0	17	3.73798184017016e-05	0.979351	0.658931	0.000114237
15902	Glyma.09G177400	0	0	0	0	1	0	0	1	1	1	0	1	1	1	1	0	1	1	0	1	1	1	1	1	1	0	1	0	0	0	17	3.73798184017016e-05	0.979351	0.658931	0.000114237
16180	Glyma.12G062800	0	0	0	0	2	0	0	0	2	0	0	0	2	0	2	0	0	1	0	1	0	2	2	2	1	0	0	0	0	0	17	3.73798184017016e-05	0.979351	0.658931	0.000114237
16522	Glyma.16G005000	0	0	0	0	5	0	0	0	0	0	0	3	4	0	1	0	0	0	0	0	4	0	0	0	0	0	0	0	0	0	17	3.73798184017016e-05	0.979351	0.658931	0.000114237
16530	Glyma.16G066600	0	0	0	0	2	0	0	2	2	2	0	1	0	2	0	0	0	1	0	1	0	2	0	0	0	0	2	0	0	0	17	3.73798184017016e-05	0.979351	0.658931	0.000114237
16553	Glyma.16G150300	0	0	0	0	1	0	0	0	0	0	0	0	0	0	3	2	0	0	0	0	0	3	2	2	3	0	1	0	0	0	17	3.73798184017016e-05	0.979351	0.658931	0.000114237
16554	Glyma.16G150400	0	0	0	0	2	0	0	0	0	0	0	0	0	0	2	1	0	0	0	2	0	2	2	2	2	0	2	0	0	0	17	3.73798184017016e-05	0.979351	0.658931	0.000114237
16728	Glyma.18G076550	0	0	0	0	2	0	0	2	2	2	0	1	2	2	0	0	0	1	0	0	0	2	0	0	1	0	0	0	0	0	17	3.73798184017016e-05	0.979351	0.658931	0.000114237
16837	Glyma.18G267100	0	0	0	0	2	0	0	0	0	0	0	2	2	2	2	0	0	1	0	0	0	2	1	2	0	0	1	0	0	0	17	3.73798184017016e-05	0.979351	0.658931	0.000114237
16839	Glyma.18G268700	0	0	0	0	2	0	0	2	0	2	0	2	2	2	1	0	0	0	0	0	0	1	1	1	0	0	1	0	0	0	17	3.73798184017016e-05	0.979351	0.658931	0.000114237
17132	Glyma.01G125000	0	0	0	0	0	0	2	2	2	2	0	0	0	0	2	0	0	0	0	2	1	2	0	0	1	0	1	0	0	0	17	3.73798184017016e-05	0.979351	0.658931	0.000114237
17323	Glyma.02G212600	0	0	0	0	0	0	0	4	2	4	0	0	2	0	1	0	0	0	0	0	1	1	0	0	0	0	2	0	0	0	17	3.73798184017016e-05	0.979351	0.658931	0.000114237
17656	Glyma.06G277300	0	0	0	0	0	0	0	2	2	2	0	0	0	2	0	0	0	0	0	0	1	2	2	2	0	0	2	0	0	0	17	3.73798184017016e-05	0.979351	0.658931	0.000114237
17675	Glyma.06G306750	0	0	0	0	0	0	0	2	2	2	0	1	0	0	2	2	0	0	0	0	2	2	0	0	2	0	0	0	0	0	17	3.73798184017016e-05	0.979351	0.658931	0.000114237
17746	Glyma.07G100800	0	0	0	0	0	0	0	2	0	2	0	0	2	1	2	0	0	0	0	0	1	2	2	2	0	0	1	0	0	0	17	3.73798184017016e-05	0.979351	0.658931	0.000114237
17784	Glyma.07G151200	0	0	0	0	0	0	0	3	2	3	0	0	3	1	1	0	0	0	0	0	0	2	2	0	0	0	0	0	0	0	17	3.73798184017016e-05	0.979351	0.658931	0.000114237
17978	Glyma.09G100900	0	0	0	0	0	0	0	2	1	2	0	0	1	0	5	0	0	0	0	0	0	4	0	1	0	0	1	0	0	0	17	3.73798184017016e-05	0.979351	0.658931	0.000114237
18283	Glyma.12G221600	0	0	0	0	0	0	0	2	2	2	0	2	0	0	1	0	0	2	0	2	2	2	0	0	0	0	0	0	0	0	17	3.73798184017016e-05	0.979351	0.658931	0.000114237
18314	Glyma.13G035100	0	0	0	0	0	0	0	2	2	2	0	0	0	0	0	0	0	0	0	0	2	2	2	2	0	0	3	0	0	0	17	3.73798184017016e-05	0.979351	0.658931	0.000114237
18637	Glyma.14G113400	0	0	0	0	0	0	0	2	2	2	0	0	2	2	2	1	0	2	0	0	1	1	0	0	0	0	0	0	0	0	17	3.73798184017016e-05	0.979351	0.658931	0.000114237
18730	Glyma.15G267100	0	0	0	0	0	0	0	2	0	2	0	0	3	1	2	0	0	0	0	1	0	2	2	1	1	0	0	0	0	0	17	3.73798184017016e-05	0.979351	0.658931	0.000114237
18854	Glyma.17G169300	0	0	0	0	0	0	0	2	0	2	0	0	0	0	2	2	0	1	0	2	0	2	2	2	0	0	0	0	0	0	17	3.73798184017016e-05	0.979351	0.658931	0.000114237
18864	Glyma.17G171400	0	0	0	0	0	0	0	4	0	4	0	0	0	0	1	0	0	0	0	1	0	0	4	2	1	0	0	0	0	0	17	3.73798184017016e-05	0.979351	0.658931	0.000114237
19003	Glyma.18G271167	0	0	0	0	0	0	0	2	0	2	0	0	3	2	3	0	0	0	0	0	0	1	2	2	0	0	0	0	0	0	17	3.73798184017016e-05	0.979351	0.658931	0.000114237
19301	Glyma.04G140400	0	0	0	0	0	0	0	0	4	0	0	1	0	1	3	0	0	0	0	2	2	4	0	0	0	0	0	0	0	0	17	3.73798184017016e-05	0.979351	0.658931	0.000114237
20755	Glyma.04G090700	0	0	0	0	0	0	0	0	0	0	0	0	2	0	2	1	0	1	0	2	2	2	2	2	0	0	1	0	0	0	17	3.73798184017016e-05	0.979351	0.658931	0.000114237
21900	Glyma.05G106900	0	0	0	0	0	0	0	0	0	0	0	0	0	0	4	0	0	1	0	0	1	4	3	1	0	0	3	0	0	0	17	3.73798184017016e-05	0.979351	0.658931	0.000114237
21905	Glyma.05G108000	0	0	0	0	0	0	0	0	0	0	0	0	0	0	4	1	0	0	0	0	0	3	3	3	0	0	3	0	0	0	17	3.73798184017016e-05	0.979351	0.658931	0.000114237
22682	Glyma.12G184000	0	0	0	0	0	0	0	0	0	0	0	0	0	0	5	0	0	0	0	0	0	4	4	3	1	0	0	0	0	0	17	3.73798184017016e-05	0.979351	0.658931	0.000114237
22965	Glyma.15G072800	0	0	0	0	0	0	0	0	0	0	0	0	0	0	1	0	0	2	0	2	2	2	2	2	2	0	2	0	0	0	17	3.73798184017016e-05	0.979351	0.658931	0.000114237
23256	Glyma.17G207600	0	0	0	0	0	0	0	0	0	0	0	0	0	0	11	0	0	1	0	0	0	0	0	0	0	0	5	0	0	0	17	3.73798184017016e-05	0.979351	0.658931	0.000114237
24694	Glyma.06G013600	0	0	0	0	0	0	0	0	0	0	0	0	0	0	0	0	0	0	0	0	4	3	4	4	2	0	0	0	0	0	17	3.73798184017016e-05	0.979351	0.658931	0.000114237
698	Glyma.01G224900	2	0	0	0	0	0	2	2	2	2	0	0	0	0	2	0	0	0	0	0	0	2	2	2	2	0	2	0	2	2	22	4.45570906040561e-05	1	0.784027	0.000135665
1381	Glyma.02G203100	2	0	0	0	2	0	0	2	2	2	0	2	2	0	0	0	0	0	0	2	2	2	0	0	0	0	2	0	2	2	22	4.45570906040561e-05	1	0.784027	0.000135665
1822	Glyma.03G049800	3	0	0	0	1	0	0	3	1	3	0	1	1	1	3	0	0	2	0	0	0	1	1	0	0	0	1	1	1	2	22	4.45570906040561e-05	1	0.784027	0.000135665
2122	Glyma.03G124801	2	0	2	0	2	0	0	0	2	0	0	2	0	0	2	0	0	0	0	0	2	2	2	2	2	0	0	0	2	2	22	4.45570906040561e-05	1	0.784027	0.000135665
2600	Glyma.04G118100	1	0	1	0	1	0	0	1	1	1	1	1	1	1	1	1	1	1	1	1	1	1	1	0	1	1	1	1	1	2	22	4.45570906040561e-05	1	0.784027	0.000135665
3797	Glyma.06G159300	2	0	0	0	0	0	0	4	2	4	0	2	0	0	2	0	0	0	0	0	2	2	0	0	0	0	2	0	2	2	22	4.45570906040561e-05	1	0.784027	0.000135665
4719	Glyma.07G127900	1	0	1	0	1	0	0	2	2	2	0	1	2	2	1	0	0	0	1	1	1	1	1	1	0	0	1	0	2	2	22	4.45570906040561e-05	1	0.784027	0.000135665
5472	Glyma.08G254100	6	0	0	0	2	0	0	0	0	0	0	0	6	0	0	0	0	2	0	2	0	4	0	0	0	0	0	0	2	2	22	4.45570906040561e-05	1	0.784027	0.000135665
5751	Glyma.08G352100	2	0	0	0	2	0	0	0	0	0	0	2	2	0	2	0	0	2	0	2	0	2	2	2	0	0	2	0	2	2	22	4.45570906040561e-05	1	0.784027	0.000135665
5759	Glyma.08G353500	2	0	0	0	2	0	0	0	0	0	2	0	2	0	2	0	0	2	0	2	0	2	2	2	0	0	2	0	2	2	22	4.45570906040561e-05	1	0.784027	0.000135665
6362	Glyma.09G192700	2	0	0	0	0	0	0	0	0	0	0	2	0	0	4	0	0	0	0	0	4	0	2	2	2	0	4	0	2	2	22	4.45570906040561e-05	1	0.784027	0.000135665
6396	Glyma.09G204200	2	0	1	0	1	0	0	1	1	1	0	0	1	0	1	0	0	1	0	2	1	2	2	2	1	0	2	0	2	2	22	4.45570906040561e-05	1	0.784027	0.000135665
6683	Glyma.10G043300	2	0	0	0	0	0	0	2	2	2	0	0	0	0	2	0	0	0	0	2	2	2	2	2	0	0	2	0	2	2	22	4.45570906040561e-05	1	0.784027	0.000135665
7296	Glyma.10G264200	2	0	0	0	2	0	0	2	2	2	0	2	2	0	2	0	0	0	0	2	2	2	0	0	0	0	0	2	0	2	22	4.45570906040561e-05	1	0.784027	0.000135665
7432	Glyma.11G080800	1	0	1	0	2	0	0	0	0	0	0	1	0	1	2	0	0	2	0	2	2	1	2	2	1	0	2	0	2	2	22	4.45570906040561e-05	1	0.784027	0.000135665
7542	Glyma.11G147100	2	0	0	0	0	0	0	2	2	2	0	0	2	2	2	2	0	0	0	0	0	2	2	2	0	0	0	0	2	2	22	4.45570906040561e-05	1	0.784027	0.000135665
9012	Glyma.13G215500	2	0	0	0	0	0	0	0	2	0	0	0	2	0	0	2	0	2	0	2	2	2	2	2	0	0	2	0	2	2	22	4.45570906040561e-05	1	0.784027	0.000135665
10148	Glyma.15G155800	2	0	0	0	2	0	0	1	2	1	0	1	2	0	3	0	0	0	0	0	2	2	2	1	0	0	1	0	2	2	22	4.45570906040561e-05	1	0.784027	0.000135665
11108	Glyma.16G144200	4	0	0	0	2	0	0	2	2	2	0	2	4	2	0	0	0	0	0	0	2	0	0	0	0	0	0	0	2	2	22	4.45570906040561e-05	1	0.784027	0.000135665
11164	Glyma.16G163500	2	0	0	0	2	0	0	0	0	0	0	2	4	0	2	0	0	0	0	2	0	2	0	2	2	0	2	2	0	2	22	4.45570906040561e-05	1	0.784027	0.000135665
11252	Glyma.16G179900	2	0	0	0	0	0	0	3	0	3	0	1	2	2	1	0	0	0	0	1	0	2	0	2	0	0	3	0	2	2	22	4.45570906040561e-05	1	0.784027	0.000135665
11367	Glyma.16G215100	1	0	0	0	1	0	0	1	1	1	0	1	1	0	3	1	0	0	0	1	1	2	3	1	2	0	1	1	1	2	22	4.45570906040561e-05	1	0.784027	0.000135665
13640	Glyma.19G239100	1	0	1	2	0	0	0	1	1	1	0	1	2	2	2	0	0	0	1	2	1	1	1	1	1	0	0	1	1	2	22	4.45570906040561e-05	1	0.784027	0.000135665
15594	Glyma.07G083000	0	0	0	0	2	0	0	2	0	2	0	0	2	2	2	0	0	0	0	0	2	2	2	2	0	0	2	2	0	2	22	4.45570906040561e-05	1	0.784027	0.000135665
15837	Glyma.09G089700	0	0	0	0	2	0	0	2	2	2	0	2	0	0	0	0	0	2	2	0	2	2	2	0	0	0	2	0	2	2	22	4.45570906040561e-05	1	0.784027	0.000135665
16005	Glyma.10G273700	0	0	0	0	2	0	0	2	2	2	0	2	2	0	0	0	0	0	2	0	2	2	0	0	2	0	2	2	0	2	22	4.45570906040561e-05	1	0.784027	0.000135665
16626	Glyma.17G063600	0	0	0	0	2	0	0	2	2	2	0	2	2	0	2	0	0	0	0	0	0	2	2	2	0	0	2	0	2	2	22	4.45570906040561e-05	1	0.784027	0.000135665
16938	Glyma.20G131000	0	0	0	0	4	0	0	0	0	0	0	0	6	0	6	0	0	4	0	2	0	0	0	0	0	0	0	0	2	2	22	4.45570906040561e-05	1	0.784027	0.000135665
17392	Glyma.03G025400	0	0	0	0	0	0	0	2	2	2	0	0	2	0	2	0	0	0	0	2	2	2	2	2	0	0	2	0	2	2	22	4.45570906040561e-05	1	0.784027	0.000135665
17676	Glyma.06G306800	0	0	0	0	0	0	0	3	3	3	0	3	0	0	4	1	0	0	0	0	2	1	0	0	2	0	0	0	2	2	22	4.45570906040561e-05	1	0.784027	0.000135665
18036	Glyma.09G191700	0	0	0	0	0	0	0	2	2	2	0	2	2	2	2	0	0	2	0	0	2	2	0	0	0	0	2	0	2	2	22	4.45570906040561e-05	1	0.784027	0.000135665
19832	Glyma.14G163200	0	0	0	0	0	0	0	0	6	0	0	2	0	6	6	0	0	0	0	0	2	0	0	0	0	0	0	0	2	2	22	4.45570906040561e-05	1	0.784027	0.000135665
3602	Glyma.06G015900	6	0	0	0	6	0	0	0	0	0	0	0	0	0	0	0	0	0	0	0	0	3	3	0	0	0	6	0	3	3	24	5.31212815941172e-05	1	0.934297	0.00016159
4337	Glyma.06G294400	3	0	0	0	0	0	0	0	3	0	0	0	0	3	3	0	0	0	0	3	3	3	0	0	0	0	3	0	3	3	24	5.31212815941172e-05	1	0.934297	0.00016159
7412	Glyma.11G067900	2	0	2	0	2	0	0	2	0	2	0	0	2	2	0	0	0	2	0	2	0	2	2	2	0	0	0	1	2	3	24	5.31212815941172e-05	1	0.934297	0.00016159
13501	Glyma.19G181200	3	0	0	0	0	0	0	3	3	3	0	3	0	0	3	0	0	0	0	0	3	3	0	0	0	0	0	0	3	3	24	5.31212815941172e-05	1	0.934297	0.00016159
14363	Glyma.19G019000	0	3	0	0	0	0	0	0	3	0	0	0	0	3	3	0	0	0	3	3	0	3	0	0	0	0	3	0	3	3	24	5.31212815941172e-05	1	0.934297	0.00016159
14721	Glyma.16G042600	0	0	3	0	0	0	0	3	0	3	0	0	3	3	3	0	0	0	0	0	3	3	0	0	0	0	0	0	3	3	24	5.31212815941172e-05	1	0.934297	0.00016159
17519	Glyma.04G255700	0	0	0	0	0	0	0	3	3	3	3	3	0	3	0	0	0	0	0	0	3	0	0	0	0	0	3	0	3	3	24	5.31212815941172e-05	1	0.934297	0.00016159
18748	Glyma.16G025800	0	0	0	0	0	0	0	3	0	3	0	0	3	3	3	0	0	3	0	3	3	0	0	0	0	0	0	0	3	3	24	5.31212815941172e-05	1	0.934297	0.00016159
369	Glyma.01G113200	1	0	0	0	1	1	2	1	2	1	0	0	0	1	1	1	0	0	0	0	1	1	2	2	0	0	1	0	1	1	19	5.69941162333185e-05	1	0.998936	0.000172152
1540	Glyma.02G270450	1	0	1	0	1	0	0	1	1	1	1	1	1	1	1	1	0	1	0	1	1	1	1	1	0	0	1	0	1	1	19	5.69941162333185e-05	1	0.998936	0.000172152
1680	Glyma.03G018800	1	1	1	0	1	0	0	1	1	1	0	1	1	1	2	0	0	0	0	1	1	1	1	1	1	0	1	0	1	1	19	5.69941162333185e-05	1	0.998936	0.000172152
1686	Glyma.03G019400	1	0	1	0	1	0	0	1	1	1	1	1	1	1	1	0	0	1	0	1	1	1	1	1	1	0	1	0	1	1	19	5.69941162333185e-05	1	0.998936	0.000172152
1751	Glyma.03G035700	1	0	1	0	1	0	0	2	1	2	0	0	0	1	2	0	0	1	0	0	1	2	2	1	0	0	1	0	1	1	19	5.69941162333185e-05	1	0.998936	0.000172152
1773	Glyma.03G038700	2	0	0	0	2	0	0	2	0	2	0	2	3	0	1	0	0	0	0	2	0	2	0	0	0	0	1	0	1	1	19	5.69941162333185e-05	1	0.998936	0.000172152
2299	Glyma.03G227600	2	0	0	0	0	0	0	2	0	2	0	0	0	2	2	2	0	1	0	2	2	0	0	0	0	0	2	0	1	1	19	5.69941162333185e-05	1	0.998936	0.000172152
2300	Glyma.03G227700	2	0	0	0	1	0	0	1	0	1	0	0	2	1	2	0	0	2	0	1	0	1	2	1	0	0	2	0	1	1	19	5.69941162333185e-05	1	0.998936	0.000172152
2579	Glyma.04G111700	1	0	1	0	1	0	0	1	1	1	0	1	1	1	1	2	0	0	0	1	1	1	1	1	1	0	1	0	1	1	19	5.69941162333185e-05	1	0.998936	0.000172152
2882	Glyma.04G210100	1	0	0	0	1	0	0	1	1	1	0	1	2	0	1	1	0	0	0	1	1	2	1	1	1	0	2	0	1	1	19	5.69941162333185e-05	1	0.998936	0.000172152
2938	Glyma.04G231451	2	0	1	0	1	0	0	0	2	0	0	0	1	1	1	1	0	0	0	2	2	0	2	1	2	0	0	1	0	1	19	5.69941162333185e-05	1	0.998936	0.000172152
3082	Glyma.05G057100	2	0	1	0	2	0	0	0	0	0	0	1	2	1	2	0	0	0	0	0	1	3	1	1	0	0	2	0	1	1	19	5.69941162333185e-05	1	0.998936	0.000172152
3338	Glyma.05G140800	2	0	1	0	1	0	0	1	1	1	0	0	1	1	1	1	0	1	0	1	1	1	1	1	1	0	1	0	1	1	19	5.69941162333185e-05	1	0.998936	0.000172152
3732	Glyma.06G105300	1	0	1	0	1	0	0	1	1	1	0	1	1	1	1	0	0	1	1	1	1	1	1	1	1	0	1	0	1	1	19	5.69941162333185e-05	1	0.998936	0.000172152
4098	Glyma.06G234000	1	0	0	0	0	0	0	2	0	2	0	1	1	1	1	1	0	1	0	2	1	2	1	1	0	0	1	0	1	1	19	5.69941162333185e-05	1	0.998936	0.000172152
4359	Glyma.06G299700	1	0	0	0	0	0	0	1	1	1	0	2	0	0	2	2	0	1	1	1	2	2	1	1	0	0	0	0	1	1	19	5.69941162333185e-05	1	0.998936	0.000172152
4504	Glyma.07G039050	3	0	0	0	1	0	0	2	2	2	0	0	1	0	2	0	0	1	0	0	0	1	1	1	0	0	2	0	1	1	19	5.69941162333185e-05	1	0.998936	0.000172152
4592	Glyma.07G085700	1	0	1	0	1	0	0	1	1	1	0	1	1	1	1	1	0	0	1	1	1	1	1	1	1	0	1	0	1	1	19	5.69941162333185e-05	1	0.998936	0.000172152
5459	Glyma.08G249650	2	0	0	0	1	0	0	1	2	1	0	1	2	1	2	0	0	0	0	1	1	2	1	1	0	0	0	0	1	1	19	5.69941162333185e-05	1	0.998936	0.000172152
5694	Glyma.08G320900	2	0	0	0	1	0	0	1	0	1	0	1	1	0	3	0	0	1	0	1	0	2	1	3	1	0	0	0	1	1	19	5.69941162333185e-05	1	0.998936	0.000172152
5990	Glyma.09G078300	4	0	0	0	1	0	0	1	1	1	0	1	2	0	2	0	0	0	0	2	2	1	0	0	0	0	1	0	1	1	19	5.69941162333185e-05	1	0.998936	0.000172152
6178	Glyma.09G134200	2	0	0	0	1	0	0	2	1	2	0	1	1	0	2	0	0	0	0	1	0	2	2	1	0	0	1	0	1	1	19	5.69941162333185e-05	1	0.998936	0.000172152
6236	Glyma.09G152700	1	0	0	0	2	0	0	2	2	2	0	0	2	2	1	0	0	0	0	0	0	2	1	1	1	0	0	0	1	1	19	5.69941162333185e-05	1	0.998936	0.000172152
6313	Glyma.09G177951	1	0	1	0	1	0	0	1	1	1	1	1	1	1	1	0	0	1	0	1	1	1	1	1	1	0	1	0	1	1	19	5.69941162333185e-05	1	0.998936	0.000172152
6590	Glyma.09G275500	3	0	0	0	0	0	0	0	0	0	0	2	0	0	4	0	0	2	0	2	0	2	2	1	1	0	0	0	1	1	19	5.69941162333185e-05	1	0.998936	0.000172152
6631	Glyma.10G016766	1	0	1	0	1	0	0	1	1	1	0	1	1	1	1	1	0	1	0	1	1	1	1	1	1	0	1	0	1	1	19	5.69941162333185e-05	1	0.998936	0.000172152
6703	Glyma.10G050700	1	0	1	0	1	0	0	1	1	1	0	1	1	1	1	1	0	1	0	1	1	1	1	1	1	0	1	0	1	1	19	5.69941162333185e-05	1	0.998936	0.000172152
6938	Glyma.10G114600	3	0	0	0	1	0	0	1	1	1	0	0	1	1	2	0	0	0	0	2	0	2	2	1	0	0	1	0	1	1	19	5.69941162333185e-05	1	0.998936	0.000172152
7216	Glyma.10G229800	1	0	0	0	1	0	0	1	1	1	0	1	1	1	2	0	0	2	1	1	1	1	1	1	0	0	1	0	1	1	19	5.69941162333185e-05	1	0.998936	0.000172152
7242	Glyma.10G239400	1	0	0	0	1	0	0	1	2	1	0	1	1	1	1	1	0	0	0	0	1	1	1	1	2	0	2	0	1	1	19	5.69941162333185e-05	1	0.998936	0.000172152
7254	Glyma.10G246800	1	0	1	0	1	0	0	1	1	1	0	1	1	1	1	1	0	1	0	1	1	1	1	1	1	0	1	0	1	1	19	5.69941162333185e-05	1	0.998936	0.000172152
7321	Glyma.10G277700	1	0	1	0	1	0	0	1	1	1	0	1	1	1	1	1	0	1	0	1	1	1	2	1	0	0	1	0	1	1	19	5.69941162333185e-05	1	0.998936	0.000172152
7574	Glyma.11G155200	2	0	0	0	2	0	0	1	1	1	0	1	1	1	2	0	0	0	0	1	1	2	1	0	0	0	2	0	1	1	19	5.69941162333185e-05	1	0.998936	0.000172152
8240	Glyma.12G184200	1	0	1	0	1	0	0	1	1	1	0	0	1	1	2	0	0	0	1	1	1	2	2	1	0	0	1	0	1	1	19	5.69941162333185e-05	1	0.998936	0.000172152
8631	Glyma.13G082350	1	0	0	0	1	0	0	1	1	1	0	1	1	1	1	1	0	1	0	1	1	1	2	1	1	0	1	0	1	1	19	5.69941162333185e-05	1	0.998936	0.000172152
8781	Glyma.13G153800	1	0	0	0	1	0	0	1	1	1	0	0	1	2	3	0	0	3	0	0	0	3	0	0	1	0	1	0	1	1	19	5.69941162333185e-05	1	0.998936	0.000172152
9229	Glyma.13G324534	1	0	1	0	1	0	0	1	1	1	0	1	1	1	1	1	0	1	1	1	1	1	1	1	0	0	1	0	1	1	19	5.69941162333185e-05	1	0.998936	0.000172152
9298	Glyma.14G014200	1	0	1	0	1	0	0	1	1	1	0	1	0	0	2	1	0	1	0	1	1	1	1	1	1	0	2	1	0	1	19	5.69941162333185e-05	1	0.998936	0.000172152
9336	Glyma.14G038300	1	0	0	0	0	0	0	2	1	2	0	0	2	1	2	0	0	1	0	1	0	2	2	1	0	0	1	0	1	1	19	5.69941162333185e-05	1	0.998936	0.000172152
9404	Glyma.14G061250	2	0	0	0	1	0	0	1	2	1	0	0	2	1	2	0	0	0	0	1	0	2	2	1	0	0	1	0	1	1	19	5.69941162333185e-05	1	0.998936	0.000172152
9802	Glyma.14G201100	2	0	0	0	1	0	0	1	2	1	0	0	2	1	2	0	0	1	0	0	0	3	2	0	0	0	1	0	1	1	19	5.69941162333185e-05	1	0.998936	0.000172152
9842	Glyma.14G216433	1	1	0	0	1	0	0	1	1	1	0	1	1	1	1	1	0	1	0	1	1	1	1	1	1	0	1	0	1	1	19	5.69941162333185e-05	1	0.998936	0.000172152
10420	Glyma.15G226850	2	0	0	0	1	0	0	0	2	0	0	1	3	1	2	0	0	0	0	0	0	2	2	3	0	0	0	0	1	1	19	5.69941162333185e-05	1	0.998936	0.000172152
10505	Glyma.15G249750	2	0	0	0	1	0	0	2	1	2	0	0	1	2	1	1	0	0	0	0	1	2	1	1	0	0	1	0	1	1	19	5.69941162333185e-05	1	0.998936	0.000172152
10545	Glyma.15G263200	1	0	0	0	0	0	0	2	1	2	0	0	2	0	3	0	0	1	0	1	1	2	2	1	0	0	0	0	1	1	19	5.69941162333185e-05	1	0.998936	0.000172152
10558	Glyma.15G265900	2	0	0	0	0	0	0	1	2	1	0	1	2	1	2	0	0	0	0	1	2	2	1	1	0	0	0	0	1	1	19	5.69941162333185e-05	1	0.998936	0.000172152
10751	Glyma.16G057200	2	0	0	0	1	0	0	1	1	1	0	1	1	1	1	0	0	0	0	2	0	1	2	2	1	0	1	0	1	1	19	5.69941162333185e-05	1	0.998936	0.000172152
10771	Glyma.16G061701	2	0	0	0	1	0	0	1	1	1	0	1	1	1	2	0	0	0	0	1	1	1	1	2	1	0	1	0	1	1	19	5.69941162333185e-05	1	0.998936	0.000172152
10824	Glyma.16G075350	2	0	0	0	1	0	0	2	2	2	0	1	0	2	2	1	0	0	0	0	0	0	2	2	0	0	0	0	1	1	19	5.69941162333185e-05	1	0.998936	0.000172152
12171	Glyma.18G111700	2	0	0	0	1	0	0	2	2	2	0	2	2	2	0	0	0	0	0	0	0	2	1	1	0	0	0	0	1	1	19	5.69941162333185e-05	1	0.998936	0.000172152
12190	Glyma.18G121000	1	0	0	0	3	0	0	1	2	1	0	1	2	1	0	1	0	0	0	1	1	4	0	0	0	0	0	0	1	1	19	5.69941162333185e-05	1	0.998936	0.000172152
12556	Glyma.18G194200	2	0	1	0	2	0	0	0	0	0	0	0	2	0	4	0	0	0	0	2	0	2	1	1	2	0	0	1	0	1	19	5.69941162333185e-05	1	0.998936	0.000172152
12581	Glyma.18G198600	1	0	0	0	2	0	0	1	1	1	0	1	2	1	1	1	0	0	0	1	1	2	1	1	0	0	1	0	1	1	19	5.69941162333185e-05	1	0.998936	0.000172152
14434	Glyma.03G184000	0	0	1	0	2	0	0	2	1	2	0	1	2	0	2	0	0	0	0	1	0	1	1	1	0	0	2	1	0	1	19	5.69941162333185e-05	1	0.998936	0.000172152
14553	Glyma.09G192900	0	0	1	0	2	0	0	2	2	2	0	1	2	1	2	0	0	0	0	0	1	1	0	0	0	0	2	0	1	1	19	5.69941162333185e-05	1	0.998936	0.000172152
14910	Glyma.01G013300	0	0	0	0	1	1	1	2	2	2	0	1	0	0	1	1	0	1	0	1	0	1	1	2	0	0	1	0	1	1	19	5.69941162333185e-05	1	0.998936	0.000172152
16242	Glyma.12G211600	0	0	0	0	2	0	0	2	0	2	0	2	1	2	2	0	0	0	0	0	0	0	2	2	0	0	2	1	0	1	19	5.69941162333185e-05	1	0.998936	0.000172152
16312	Glyma.14G025600	0	0	0	0	1	0	0	1	1	1	1	1	1	1	1	1	0	1	0	1	1	2	1	1	1	0	1	0	1	1	19	5.69941162333185e-05	1	0.998936	0.000172152
16501	Glyma.15G229100	0	0	0	0	4	0	0	0	4	0	0	1	4	3	0	0	0	0	0	0	1	0	0	0	0	0	2	0	1	1	19	5.69941162333185e-05	1	0.998936	0.000172152
16862	Glyma.19G136500	0	0	0	0	1	0	0	1	3	1	0	1	1	1	3	1	0	3	0	1	0	1	0	0	0	0	1	0	1	1	19	5.69941162333185e-05	1	0.998936	0.000172152
18810	Glyma.16G203400	0	0	0	0	0	0	0	2	2	2	0	0	2	0	4	1	0	0	0	1	2	0	1	0	0	0	2	0	1	1	19	5.69941162333185e-05	1	0.998936	0.000172152
3630	Glyma.06G032500	8	0	0	0	2	0	0	2	0	2	0	0	0	0	4	0	0	0	0	2	0	0	2	2	0	0	2	2	2	4	26	5.90357804958801e-05	1	1	0.000178237
11235	Glyma.16G173700	2	0	0	0	4	0	0	0	0	0	0	0	4	2	4	0	0	0	0	2	0	2	2	0	0	0	4	2	2	4	26	5.90357804958801e-05	1	1	0.000178237
12068	Glyma.18G082200	4	0	0	0	0	0	0	4	4	4	0	2	0	4	2	2	0	0	0	0	0	0	0	0	0	0	0	0	4	4	26	5.90357804958801e-05	1	1	0.000178237
14668	Glyma.13G211600	0	0	2	0	0	0	0	2	0	2	0	2	4	0	2	0	0	0	0	0	0	2	2	2	2	0	4	0	4	4	26	5.90357804958801e-05	1	1	0.000178237
19	Glyma.01G009500	1	0	0	0	0	1	1	1	1	1	0	0	1	0	3	2	0	0	0	0	0	1	1	1	0	0	1	0	0	0	16	6.33424836662398e-05	1	1	0.000180388
86	Glyma.01G033300	1	0	0	0	0	1	1	2	1	2	0	1	1	0	1	0	0	0	0	0	1	1	1	1	1	0	0	0	0	0	16	6.33424836662398e-05	1	1	0.000180388
107	Glyma.01G036900	2	0	0	0	2	0	0	2	2	2	0	2	0	0	0	0	0	0	0	0	0	0	2	0	0	0	2	0	0	0	16	6.33424836662398e-05	1	1	0.000180388
119	Glyma.01G043400	1	0	0	0	1	1	1	1	1	1	0	0	1	1	1	1	0	0	0	1	1	1	1	0	0	0	1	0	0	0	16	6.33424836662398e-05	1	1	0.000180388
161	Glyma.01G063750	1	0	0	0	0	1	0	2	0	2	0	0	3	1	2	0	0	0	0	0	0	3	0	0	0	0	1	0	0	0	16	6.33424836662398e-05	1	1	0.000180388
202	Glyma.01G075900	1	0	0	0	1	1	1	1	1	1	0	0	1	1	1	0	0	1	0	1	0	1	1	1	1	0	0	0	0	0	16	6.33424836662398e-05	1	1	0.000180388
244	Glyma.01G086800	2	0	0	0	1	1	1	1	2	1	0	0	2	0	2	0	0	0	0	1	0	1	1	0	0	0	0	0	0	0	16	6.33424836662398e-05	1	1	0.000180388
284	Glyma.01G095300	2	0	0	0	0	0	3	0	2	0	0	1	0	0	3	0	0	0	0	2	0	2	1	0	0	0	0	0	0	0	16	6.33424836662398e-05	1	1	0.000180388
323	Glyma.01G104400	4	0	0	0	0	0	0	0	0	0	0	0	6	0	2	0	0	2	0	0	0	2	0	0	0	0	0	0	0	0	16	6.33424836662398e-05	1	1	0.000180388
383	Glyma.01G115700	2	0	0	0	2	2	2	0	0	0	0	0	0	2	2	0	0	2	0	0	0	2	0	0	0	0	0	0	0	0	16	6.33424836662398e-05	1	1	0.000180388
384	Glyma.01G115900	2	0	0	0	2	2	0	1	1	1	0	0	0	2	1	0	0	0	0	0	1	1	0	0	1	0	1	0	0	0	16	6.33424836662398e-05	1	1	0.000180388
385	Glyma.01G116300	2	0	0	0	0	1	2	1	1	1	0	0	0	1	1	0	0	0	0	0	1	1	2	1	0	0	1	0	0	0	16	6.33424836662398e-05	1	1	0.000180388
392	Glyma.01G117800	1	0	0	0	1	1	2	0	0	0	0	0	0	1	2	0	0	0	0	1	0	3	2	1	0	0	1	0	0	0	16	6.33424836662398e-05	1	1	0.000180388
400	Glyma.01G119150	3	0	0	0	0	0	2	0	0	0	0	0	0	0	3	0	0	0	0	0	1	4	2	0	0	0	1	0	0	0	16	6.33424836662398e-05	1	1	0.000180388
408	Glyma.01G120400	2	0	0	0	0	0	4	0	0	0	0	0	0	0	6	0	0	0	0	0	0	4	0	0	0	0	0	0	0	0	16	6.33424836662398e-05	1	1	0.000180388
411	Glyma.01G121100	1	0	0	0	1	0	2	2	2	2	0	0	1	0	3	0	0	0	0	0	0	0	1	0	0	0	1	0	0	0	16	6.33424836662398e-05	1	1	0.000180388
422	Glyma.01G123000	1	0	0	0	1	0	1	1	1	1	0	0	1	1	2	0	0	0	0	1	1	1	1	1	0	0	1	0	0	0	16	6.33424836662398e-05	1	1	0.000180388
491	Glyma.01G137400	1	0	1	0	1	0	1	1	2	1	0	0	2	0	2	0	0	0	0	0	1	1	1	0	0	0	1	0	0	0	16	6.33424836662398e-05	1	1	0.000180388
518	Glyma.01G148500	2	0	0	0	1	0	1	1	1	1	0	0	1	1	2	0	0	0	0	2	0	1	1	0	0	0	1	0	0	0	16	6.33424836662398e-05	1	1	0.000180388
533	Glyma.01G152500	6	0	0	0	6	0	0	6	0	6	0	0	0	6	0	0	0	0	0	0	0	0	0	0	0	0	0	0	6	6	30	6.33424836662398e-05	1	1	0.000180388
553	Glyma.01G156900	2	0	0	0	0	0	4	0	2	0	0	0	2	0	0	0	0	0	0	0	2	0	0	2	0	0	2	0	0	0	16	6.33424836662398e-05	1	1	0.000180388
653	Glyma.01G212300	4	0	0	0	0	0	0	0	0	0	0	0	0	0	0	0	0	0	0	0	0	4	4	4	0	0	0	0	0	0	16	6.33424836662398e-05	1	1	0.000180388
689	Glyma.01G222700	1	0	0	0	0	0	2	1	1	1	0	1	0	0	1	1	0	1	0	1	1	1	1	1	1	0	0	0	0	0	16	6.33424836662398e-05	1	1	0.000180388
691	Glyma.01G223200	2	0	0	0	0	0	0	2	2	2	0	2	0	0	0	0	0	2	2	2	0	0	0	0	0	0	0	0	0	0	16	6.33424836662398e-05	1	1	0.000180388
720	Glyma.01G234100	2	0	0	0	0	0	0	0	2	0	0	1	0	0	0	0	0	0	0	1	2	2	2	2	0	0	2	0	0	0	16	6.33424836662398e-05	1	1	0.000180388
758	Glyma.02G003300	1	0	0	0	0	0	1	0	0	0	0	1	2	2	1	0	0	2	0	1	0	1	1	1	0	0	2	0	0	0	16	6.33424836662398e-05	1	1	0.000180388
825	Glyma.02G033600	1	0	0	0	1	0	1	1	1	1	0	0	1	1	1	0	0	0	0	1	1	1	1	1	1	0	1	0	0	0	16	6.33424836662398e-05	1	1	0.000180388
827	Glyma.02G036500	2	0	0	0	1	0	1	2	1	2	0	0	1	1	1	0	0	0	0	0	0	1	1	1	0	0	1	0	0	0	16	6.33424836662398e-05	1	1	0.000180388
850	Glyma.02G051100	1	0	0	0	1	0	1	1	1	1	0	1	1	1	1	0	0	0	0	1	1	1	1	1	0	0	1	0	0	0	16	6.33424836662398e-05	1	1	0.000180388
858	Glyma.02G052600	1	0	0	0	1	0	1	1	1	1	0	1	1	1	1	0	0	0	0	1	1	1	1	1	0	0	1	0	0	0	16	6.33424836662398e-05	1	1	0.000180388
882	Glyma.02G058950	2	0	0	0	1	0	2	1	1	1	0	0	1	1	0	0	0	0	0	2	1	0	1	1	0	0	1	0	0	0	16	6.33424836662398e-05	1	1	0.000180388
962	Glyma.02G081100	1	0	1	0	0	0	1	1	1	1	0	0	1	1	1	2	0	0	0	1	1	1	0	0	1	0	1	0	0	0	16	6.33424836662398e-05	1	1	0.000180388
988	Glyma.02G090500	3	0	0	0	0	0	2	2	0	2	0	0	0	0	0	0	0	1	0	0	0	2	2	2	0	0	0	0	0	0	16	6.33424836662398e-05	1	1	0.000180388
999	Glyma.02G093300	2	0	0	0	0	0	4	2	0	2	0	0	0	0	0	2	0	0	0	0	0	2	2	0	0	0	0	0	0	0	16	6.33424836662398e-05	1	1	0.000180388
1006	Glyma.02G095000	1	0	0	0	1	0	1	2	1	2	0	0	1	1	1	0	0	0	0	0	1	1	1	1	0	0	1	0	0	0	16	6.33424836662398e-05	1	1	0.000180388
1061	Glyma.02G110000	6	0	0	0	0	0	0	0	0	0	0	0	0	0	0	2	0	0	0	0	0	8	0	0	0	0	0	0	0	0	16	6.33424836662398e-05	1	1	0.000180388
1131	Glyma.02G138700	1	0	1	0	1	0	1	1	1	1	0	1	1	1	0	1	0	0	0	1	1	0	1	1	0	0	1	0	0	0	16	6.33424836662398e-05	1	1	0.000180388
1142	Glyma.02G148000	1	0	0	0	1	0	1	1	1	1	0	1	1	1	1	0	0	0	0	1	1	1	1	1	0	0	1	0	0	0	16	6.33424836662398e-05	1	1	0.000180388
1264	Glyma.02G176700	1	0	0	0	1	0	2	1	1	1	0	0	1	0	2	0	0	0	0	0	0	1	2	0	2	0	1	0	0	0	16	6.33424836662398e-05	1	1	0.000180388
1271	Glyma.02G177900	1	0	0	0	1	0	1	1	1	1	0	1	1	1	1	0	0	0	0	1	1	1	1	1	0	0	1	0	0	0	16	6.33424836662398e-05	1	1	0.000180388
1281	Glyma.02G180900	4	0	0	0	0	0	0	0	3	0	0	0	1	0	0	0	0	0	0	1	0	4	1	0	0	0	2	0	0	0	16	6.33424836662398e-05	1	1	0.000180388
1284	Glyma.02G181800	2	0	1	0	0	0	0	1	2	1	0	1	0	0	0	0	0	0	0	1	1	2	2	1	0	0	1	0	0	0	16	6.33424836662398e-05	1	1	0.000180388
1296	Glyma.02G183451	2	0	0	0	0	0	1	3	1	3	0	0	1	0	1	0	0	0	0	1	1	1	1	0	0	0	0	0	0	0	16	6.33424836662398e-05	1	1	0.000180388
1327	Glyma.02G187850	2	0	0	0	1	0	2	1	2	1	0	1	0	0	0	0	0	0	0	0	1	2	1	1	0	0	1	0	0	0	16	6.33424836662398e-05	1	1	0.000180388
1346	Glyma.02G193200	2	0	0	0	2	0	2	2	2	2	0	0	0	0	0	0	0	0	0	0	0	2	2	0	0	0	0	0	0	0	16	6.33424836662398e-05	1	1	0.000180388
1370	Glyma.02G200900	1	0	0	0	0	0	0	1	1	1	0	1	1	1	1	0	0	1	0	1	0	2	1	1	1	0	1	0	0	0	16	6.33424836662398e-05	1	1	0.000180388
1374	Glyma.02G201800	2	0	0	0	0	0	0	2	2	2	0	0	2	2	0	0	0	0	0	0	0	2	0	0	0	0	2	0	0	0	16	6.33424836662398e-05	1	1	0.000180388
1384	Glyma.02G207900	1	0	0	0	1	0	0	1	1	1	0	0	1	1	1	0	0	1	0	1	1	1	1	1	1	0	1	0	0	0	16	6.33424836662398e-05	1	1	0.000180388
1394	Glyma.02G211800	1	0	0	0	2	0	0	2	2	2	0	0	2	0	1	0	0	0	0	0	1	1	0	0	0	0	2	0	0	0	16	6.33424836662398e-05	1	1	0.000180388
1496	Glyma.02G246500	1	0	0	0	1	0	0	1	1	1	0	0	1	1	1	0	0	1	0	1	1	1	1	1	1	0	1	0	0	0	16	6.33424836662398e-05	1	1	0.000180388
1508	Glyma.02G254500	1	0	0	0	1	0	0	1	1	1	0	1	1	1	1	0	0	0	0	1	1	1	1	1	1	0	1	0	0	0	16	6.33424836662398e-05	1	1	0.000180388
1527	Glyma.02G260800	2	0	0	0	0	0	0	0	2	0	0	0	2	0	4	0	0	0	0	0	0	4	2	0	0	0	0	0	0	0	16	6.33424836662398e-05	1	1	0.000180388
1587	Glyma.02G296800	2	0	0	0	2	0	0	0	0	0	0	0	2	2	0	2	0	0	0	2	0	0	0	4	0	0	0	0	0	0	16	6.33424836662398e-05	1	1	0.000180388
1782	Glyma.03G040600	1	0	0	0	0	0	0	1	2	1	0	0	3	0	1	0	0	0	0	1	0	0	3	1	1	0	1	0	0	0	16	6.33424836662398e-05	1	1	0.000180388
1791	Glyma.03G041800	1	0	0	0	0	0	0	1	1	1	0	0	1	1	3	0	0	2	0	1	0	1	1	1	0	0	1	0	0	0	16	6.33424836662398e-05	1	1	0.000180388
1797	Glyma.03G043100	3	0	0	0	0	0	0	0	0	0	0	0	0	0	3	0	0	0	0	0	0	3	1	3	3	0	0	0	0	0	16	6.33424836662398e-05	1	1	0.000180388
1831	Glyma.03G050951	2	0	0	0	1	0	0	2	2	2	0	0	0	0	1	0	0	0	0	0	0	2	0	2	0	0	2	0	0	0	16	6.33424836662398e-05	1	1	0.000180388
1920	Glyma.03G068701	2	0	0	0	2	0	0	0	2	0	0	0	2	0	2	0	0	0	0	0	0	4	2	0	0	0	0	0	0	0	16	6.33424836662398e-05	1	1	0.000180388
1935	Glyma.03G070700	1	0	0	0	1	0	0	2	1	2	0	1	1	0	1	0	0	1	0	0	0	2	1	1	0	0	1	0	0	0	16	6.33424836662398e-05	1	1	0.000180388
1946	Glyma.03G072901	1	0	1	0	1	0	0	1	1	1	0	0	1	1	1	0	0	1	0	1	1	1	1	1	0	0	1	0	0	0	16	6.33424836662398e-05	1	1	0.000180388
2069	Glyma.03G097300	2	0	0	0	0	0	0	2	2	2	0	0	2	0	2	0	0	0	0	0	0	2	2	0	0	0	0	0	0	0	16	6.33424836662398e-05	1	1	0.000180388
2085	Glyma.03G103266	1	0	0	0	1	0	0	1	1	1	0	0	1	0	1	0	0	2	0	0	3	1	1	1	0	0	1	0	0	0	16	6.33424836662398e-05	1	1	0.000180388
2160	Glyma.03G135300	3	0	0	0	0	0	0	2	0	2	0	0	0	0	1	1	0	0	0	0	0	3	0	2	0	0	2	0	0	0	16	6.33424836662398e-05	1	1	0.000180388
2211	Glyma.03G154800	1	0	0	0	1	0	0	1	1	1	0	0	1	1	1	0	0	1	0	1	1	1	1	1	1	0	1	0	0	0	16	6.33424836662398e-05	1	1	0.000180388
2212	Glyma.03G155700	1	0	0	0	1	0	0	1	1	1	0	0	1	1	1	0	0	1	0	1	1	1	1	1	1	0	1	0	0	0	16	6.33424836662398e-05	1	1	0.000180388
2254	Glyma.03G181300	4	0	0	0	0	0	0	0	0	0	0	0	0	0	4	0	0	0	0	0	0	4	4	0	0	0	0	0	0	0	16	6.33424836662398e-05	1	1	0.000180388
2276	Glyma.03G208800	2	0	0	0	0	0	0	2	0	2	0	0	2	0	4	0	0	0	0	0	0	2	0	0	0	0	2	0	0	0	16	6.33424836662398e-05	1	1	0.000180388
2277	Glyma.03G209000	1	0	0	0	0	0	0	1	1	1	0	1	1	1	1	0	0	1	0	0	2	1	2	1	0	0	1	0	0	0	16	6.33424836662398e-05	1	1	0.000180388
2347	Glyma.03G247400	1	0	0	0	1	0	0	1	1	1	0	1	1	1	1	0	0	0	0	1	1	1	1	1	1	0	1	0	0	0	16	6.33424836662398e-05	1	1	0.000180388
2411	Glyma.04G013500	2	0	0	0	0	0	0	2	2	2	0	2	0	0	0	0	0	0	2	0	2	0	0	0	0	0	2	0	0	0	16	6.33424836662398e-05	1	1	0.000180388
2413	Glyma.04G013900	2	0	2	0	0	0	0	2	2	2	0	2	0	0	0	0	0	0	0	0	2	0	0	0	0	0	2	0	0	0	16	6.33424836662398e-05	1	1	0.000180388
2493	Glyma.04G089000	1	0	0	0	1	0	0	1	1	1	0	1	1	1	3	0	0	0	0	0	1	1	1	1	0	0	1	0	0	0	16	6.33424836662398e-05	1	1	0.000180388
2511	Glyma.04G096300	4	0	0	0	0	0	0	0	2	0	0	0	4	0	4	0	0	0	0	0	0	0	0	2	0	0	0	0	0	0	16	6.33424836662398e-05	1	1	0.000180388
2516	Glyma.04G096700	3	0	0	0	0	0	0	0	3	0	0	0	3	3	2	0	0	0	0	1	0	0	0	1	0	0	0	0	0	0	16	6.33424836662398e-05	1	1	0.000180388
2534	Glyma.04G101950	2	0	0	0	0	0	0	0	1	0	0	0	0	1	2	1	0	0	0	1	2	1	2	1	0	0	2	0	0	0	16	6.33424836662398e-05	1	1	0.000180388
2536	Glyma.04G102500	2	0	0	0	1	0	0	1	1	1	0	0	1	0	1	1	0	0	0	0	1	2	1	0	1	0	2	0	0	0	16	6.33424836662398e-05	1	1	0.000180388
2540	Glyma.04G103400	1	0	0	0	0	0	0	1	1	1	0	1	0	1	1	0	0	0	1	1	1	1	1	2	1	0	1	0	0	0	16	6.33424836662398e-05	1	1	0.000180388
2581	Glyma.04G112100	2	0	0	0	0	0	0	2	2	2	0	0	2	0	2	0	0	0	0	0	0	2	2	0	0	0	0	0	0	0	16	6.33424836662398e-05	1	1	0.000180388
2589	Glyma.04G114300	2	0	0	0	0	0	0	0	2	0	0	2	0	2	0	0	0	0	0	2	2	2	0	0	0	0	2	0	0	0	16	6.33424836662398e-05	1	1	0.000180388
2602	Glyma.04G119100	2	0	0	0	0	0	0	0	3	0	0	0	0	2	2	0	0	0	0	1	1	2	1	0	1	0	1	0	0	0	16	6.33424836662398e-05	1	1	0.000180388
2712	Glyma.04G149600	2	0	0	0	0	0	0	2	2	2	0	0	2	0	1	0	0	0	0	1	0	1	1	1	0	0	1	0	0	0	16	6.33424836662398e-05	1	1	0.000180388
2724	Glyma.04G151500	1	0	0	0	1	0	0	1	2	1	0	0	1	2	1	0	0	0	0	1	1	2	1	0	0	0	1	0	0	0	16	6.33424836662398e-05	1	1	0.000180388
2737	Glyma.04G154200	2	0	0	0	0	0	0	1	4	1	0	0	1	2	1	0	0	0	0	1	0	1	1	1	0	0	0	0	0	0	16	6.33424836662398e-05	1	1	0.000180388
2770	Glyma.04G162400	2	0	0	0	0	0	0	1	3	1	0	0	1	1	2	0	0	0	0	1	0	3	1	0	0	0	0	0	0	0	16	6.33424836662398e-05	1	1	0.000180388
2811	Glyma.04G174000	2	0	0	0	1	0	0	1	1	1	0	0	1	1	1	0	0	1	0	0	1	2	1	1	0	0	1	0	0	0	16	6.33424836662398e-05	1	1	0.000180388
2813	Glyma.04G174400	2	0	0	0	1	0	0	1	2	1	0	0	2	0	1	0	0	0	0	1	0	2	2	0	0	0	1	0	0	0	16	6.33424836662398e-05	1	1	0.000180388
2886	Glyma.04G211100	1	0	1	0	0	0	0	1	2	1	0	1	0	0	1	1	0	0	1	0	2	1	1	1	1	0	0	0	0	0	16	6.33424836662398e-05	1	1	0.000180388
2929	Glyma.04G229850	2	0	0	0	2	0	0	0	2	0	0	0	2	0	2	0	0	0	0	1	0	2	2	1	0	0	0	0	0	0	16	6.33424836662398e-05	1	1	0.000180388
2944	Glyma.04G235800	1	0	0	0	1	0	0	1	1	1	0	0	1	1	2	1	0	0	0	1	1	1	1	1	0	0	1	0	0	0	16	6.33424836662398e-05	1	1	0.000180388
2993	Glyma.05G019800	4	0	0	0	0	0	0	0	0	0	0	0	4	4	4	0	0	0	0	0	0	0	0	0	0	0	0	0	0	0	16	6.33424836662398e-05	1	1	0.000180388
2999	Glyma.05G027000	2	0	0	0	0	0	0	1	2	1	0	0	2	0	2	0	0	0	0	0	1	1	2	0	0	0	2	0	0	0	16	6.33424836662398e-05	1	1	0.000180388
3006	Glyma.05G031200	2	0	0	0	0	0	0	1	1	1	0	0	2	0	3	0	0	0	0	1	1	1	1	1	0	0	1	0	0	0	16	6.33424836662398e-05	1	1	0.000180388
3010	Glyma.05G032200	1	0	0	0	1	0	0	1	1	1	0	0	1	0	1	0	0	0	0	2	1	1	2	2	0	0	1	0	0	0	16	6.33424836662398e-05	1	1	0.000180388
3027	Glyma.05G035700	1	0	1	0	1	0	0	1	1	1	0	0	0	1	1	1	0	1	0	1	1	1	1	1	1	0	0	0	0	0	16	6.33424836662398e-05	1	1	0.000180388
3071	Glyma.05G055000	2	0	0	0	0	0	0	0	0	0	0	0	2	2	2	0	0	0	0	0	0	2	2	2	2	0	0	0	0	0	16	6.33424836662398e-05	1	1	0.000180388
3079	Glyma.05G056800	2	0	0	0	0	0	0	0	0	0	0	0	2	0	2	2	0	0	0	0	0	2	2	2	0	0	2	0	0	0	16	6.33424836662398e-05	1	1	0.000180388
3089	Glyma.05G058900	1	0	0	0	2	0	0	1	1	1	0	0	2	1	1	0	0	0	0	0	1	2	0	0	1	0	2	0	0	0	16	6.33424836662398e-05	1	1	0.000180388
3091	Glyma.05G059200	1	0	0	0	3	0	0	1	1	1	0	0	1	0	1	0	0	1	0	0	0	1	1	1	0	0	3	0	0	0	16	6.33424836662398e-05	1	1	0.000180388
3092	Glyma.05G059300	1	0	0	0	1	0	0	1	1	1	0	1	1	1	1	1	0	1	0	0	1	1	1	1	0	0	1	0	0	0	16	6.33424836662398e-05	1	1	0.000180388
3135	Glyma.05G076900	1	0	0	0	1	0	0	1	1	1	0	0	1	1	1	0	0	1	0	1	1	1	1	1	1	0	1	0	0	0	16	6.33424836662398e-05	1	1	0.000180388
3148	Glyma.05G080133	2	0	0	0	0	0	0	1	1	1	0	0	1	0	2	0	0	1	0	1	1	1	2	1	0	0	1	0	0	0	16	6.33424836662398e-05	1	1	0.000180388
3189	Glyma.05G088550	2	0	0	0	0	0	0	1	2	1	0	0	2	1	2	0	0	0	0	1	0	2	1	1	0	0	0	0	0	0	16	6.33424836662398e-05	1	1	0.000180388
3204	Glyma.05G092100	1	0	0	2	0	0	0	1	0	1	0	1	1	2	2	1	0	0	0	2	2	0	0	0	0	0	0	0	0	0	16	6.33424836662398e-05	1	1	0.000180388
3215	Glyma.05G095400	3	0	0	0	1	0	0	2	1	2	0	0	2	0	3	0	0	0	0	0	0	1	1	0	0	0	0	0	0	0	16	6.33424836662398e-05	1	1	0.000180388
3225	Glyma.05G098250	1	0	0	0	1	0	0	1	1	1	0	0	1	1	1	0	0	1	0	1	1	1	1	1	1	0	1	0	0	0	16	6.33424836662398e-05	1	1	0.000180388
3235	Glyma.05G102300	1	0	0	0	1	0	0	1	1	1	0	0	1	1	1	0	0	1	0	2	1	1	1	1	0	0	1	0	0	0	16	6.33424836662398e-05	1	1	0.000180388
3263	Glyma.05G114600	2	0	0	0	2	0	0	1	1	1	0	0	1	1	1	0	0	0	0	0	1	1	1	1	0	0	2	0	0	0	16	6.33424836662398e-05	1	1	0.000180388
3281	Glyma.05G121800	1	0	1	0	1	0	0	1	1	1	0	1	0	0	2	0	0	1	0	1	0	1	1	1	1	0	1	0	0	0	16	6.33424836662398e-05	1	1	0.000180388
3314	Glyma.05G135050	2	0	0	0	0	0	0	2	0	2	0	1	0	0	2	1	0	0	0	2	0	2	2	0	0	0	0	0	0	0	16	6.33424836662398e-05	1	1	0.000180388
3381	Glyma.05G167600	1	0	1	0	1	0	0	1	1	1	0	1	1	0	1	1	0	0	0	1	1	1	1	1	1	0	0	0	0	0	16	6.33424836662398e-05	1	1	0.000180388
3398	Glyma.05G178800	2	0	0	0	0	0	0	0	0	0	2	0	0	2	2	2	0	0	0	2	0	0	2	0	2	0	0	0	0	0	16	6.33424836662398e-05	1	1	0.000180388
3413	Glyma.05G187000	4	0	0	0	0	0	0	0	0	0	0	0	0	0	4	0	0	0	0	0	0	0	4	4	0	0	0	0	0	0	16	6.33424836662398e-05	1	1	0.000180388
3444	Glyma.05G195800	2	0	0	0	2	0	0	0	0	0	0	2	0	0	2	0	0	0	0	2	2	2	0	0	0	0	2	0	0	0	16	6.33424836662398e-05	1	1	0.000180388
3508	Glyma.05G214700	1	0	1	0	0	0	0	1	1	1	0	0	1	1	2	0	0	0	1	1	1	1	1	1	1	0	0	0	0	0	16	6.33424836662398e-05	1	1	0.000180388
3537	Glyma.05G222900	2	0	0	0	0	0	0	2	2	2	0	0	2	2	2	0	0	0	0	0	2	0	0	0	0	0	0	0	0	0	16	6.33424836662398e-05	1	1	0.000180388
3551	Glyma.05G227200	1	0	1	0	1	0	0	1	1	1	0	0	1	1	1	0	0	1	0	1	1	2	1	1	0	0	0	0	0	0	16	6.33424836662398e-05	1	1	0.000180388
3564	Glyma.05G229751	1	0	1	0	1	0	0	1	1	1	0	1	1	1	1	0	0	1	0	1	1	1	1	1	0	0	0	0	0	0	16	6.33424836662398e-05	1	1	0.000180388
3598	Glyma.06G007400	1	0	0	0	1	0	0	2	1	2	0	1	2	0	2	0	0	0	0	0	0	1	2	0	0	0	1	0	0	0	16	6.33424836662398e-05	1	1	0.000180388
3671	Glyma.06G049900	1	0	0	0	0	0	0	1	2	1	0	0	2	0	4	0	0	1	1	0	1	1	1	0	0	0	0	0	0	0	16	6.33424836662398e-05	1	1	0.000180388
3742	Glyma.06G115100	1	0	1	0	1	0	0	1	1	1	0	0	1	1	1	0	0	1	0	1	1	1	1	1	0	0	1	0	0	0	16	6.33424836662398e-05	1	1	0.000180388
3750	Glyma.06G124400	2	0	0	0	0	0	0	0	0	0	0	0	2	2	2	0	0	0	2	2	0	2	0	2	0	0	0	0	0	0	16	6.33424836662398e-05	1	1	0.000180388
3754	Glyma.06G126000	1	0	0	0	1	0	0	1	1	1	0	0	1	1	1	0	0	1	0	1	1	1	1	1	1	0	1	0	0	0	16	6.33424836662398e-05	1	1	0.000180388
3757	Glyma.06G127000	2	0	0	0	0	0	0	0	2	0	0	0	2	2	2	2	0	0	0	2	0	2	0	0	0	0	0	0	0	0	16	6.33424836662398e-05	1	1	0.000180388
3763	Glyma.06G130500	2	0	0	0	1	0	0	2	2	2	0	0	1	0	3	0	0	0	0	0	0	2	1	0	0	0	0	0	0	0	16	6.33424836662398e-05	1	1	0.000180388
3805	Glyma.06G163100	2	0	0	0	0	0	0	2	2	2	0	2	0	0	2	0	0	0	0	0	2	0	0	0	0	0	2	0	0	0	16	6.33424836662398e-05	1	1	0.000180388
4017	Glyma.06G217000	1	0	0	0	1	0	0	1	1	1	0	0	1	1	1	0	0	1	0	1	1	1	1	1	1	0	1	0	0	0	16	6.33424836662398e-05	1	1	0.000180388
4061	Glyma.06G225000	2	0	0	0	0	0	0	2	2	2	0	0	2	0	2	0	0	0	0	0	0	2	2	0	0	0	0	0	0	0	16	6.33424836662398e-05	1	1	0.000180388
4157	Glyma.06G256500	1	0	0	0	0	0	0	2	1	2	0	0	1	1	1	0	0	1	0	1	1	1	1	1	0	0	1	0	0	0	16	6.33424836662398e-05	1	1	0.000180388
4161	Glyma.06G258101	1	0	0	0	2	0	0	1	5	1	0	0	1	0	1	0	0	0	0	0	0	1	1	2	0	0	0	0	0	0	16	6.33424836662398e-05	1	1	0.000180388
4184	Glyma.06G262700	2	0	0	0	0	0	0	2	2	2	0	0	2	0	2	0	0	0	0	0	0	2	2	0	0	0	0	0	0	0	16	6.33424836662398e-05	1	1	0.000180388
4190	Glyma.06G263500	2	0	0	0	0	0	0	2	2	2	0	0	4	0	0	0	0	0	0	0	0	0	4	0	0	0	0	0	0	0	16	6.33424836662398e-05	1	1	0.000180388
4218	Glyma.06G266900	2	0	0	0	2	0	0	0	2	0	0	0	0	2	2	0	0	0	0	0	2	0	0	0	2	0	2	0	0	0	16	6.33424836662398e-05	1	1	0.000180388
4250	Glyma.06G275800	2	0	0	0	2	0	0	0	0	0	0	0	0	0	0	0	0	2	0	2	0	2	2	2	2	0	0	0	0	0	16	6.33424836662398e-05	1	1	0.000180388
4294	Glyma.06G286200	1	0	0	0	1	0	0	1	1	1	0	0	0	1	1	1	0	1	0	1	1	1	1	1	1	0	1	0	0	0	16	6.33424836662398e-05	1	1	0.000180388
4382	Glyma.06G308000	2	0	2	0	0	0	0	0	2	0	0	2	0	0	0	1	0	1	0	1	2	1	1	1	0	0	0	0	0	0	16	6.33424836662398e-05	1	1	0.000180388
4446	Glyma.07G001300	2	0	0	0	0	0	0	0	2	0	0	0	0	0	2	0	0	2	0	2	2	2	2	0	0	0	0	0	0	0	16	6.33424836662398e-05	1	1	0.000180388
4479	Glyma.07G027200	1	0	0	0	1	0	0	1	1	1	0	0	1	1	1	0	0	0	0	0	1	2	1	2	0	0	2	0	0	0	16	6.33424836662398e-05	1	1	0.000180388
4524	Glyma.07G050700	2	0	0	0	0	0	0	2	2	2	0	0	2	0	2	0	0	0	0	0	0	2	2	0	0	0	0	0	0	0	16	6.33424836662398e-05	1	1	0.000180388
4530	Glyma.07G054000	2	0	0	0	1	0	0	1	1	1	0	0	2	1	1	0	0	1	0	0	1	1	1	1	0	0	1	0	0	0	16	6.33424836662398e-05	1	1	0.000180388
4534	Glyma.07G055000	1	0	0	0	1	0	0	1	1	1	0	1	1	1	1	0	0	0	0	0	1	2	2	1	0	0	1	0	0	0	16	6.33424836662398e-05	1	1	0.000180388
4541	Glyma.07G058000	1	0	1	0	1	0	0	1	1	1	0	1	1	1	2	0	0	0	0	0	1	1	1	1	0	0	1	0	0	0	16	6.33424836662398e-05	1	1	0.000180388
4594	Glyma.07G086000	1	0	1	0	1	0	0	1	1	1	0	0	1	1	1	1	0	0	0	1	1	1	1	1	0	0	1	0	0	0	16	6.33424836662398e-05	1	1	0.000180388
4632	Glyma.07G095301	2	0	0	0	0	0	0	1	1	1	0	0	2	1	2	0	0	0	1	1	0	1	1	1	0	0	1	0	0	0	16	6.33424836662398e-05	1	1	0.000180388
4647	Glyma.07G101501	1	0	0	0	1	0	0	1	1	1	0	1	1	1	1	0	0	0	0	1	1	1	1	1	1	0	1	0	0	0	16	6.33424836662398e-05	1	1	0.000180388
4709	Glyma.07G125800	1	0	0	0	1	0	0	1	1	1	0	1	1	1	1	0	0	0	0	1	1	1	1	1	1	0	1	0	0	0	16	6.33424836662398e-05	1	1	0.000180388
4714	Glyma.07G126550	1	0	1	0	1	0	0	1	1	1	0	1	1	1	1	0	0	0	0	1	1	1	1	1	0	0	1	0	0	0	16	6.33424836662398e-05	1	1	0.000180388
4779	Glyma.07G147100	1	0	1	0	0	0	0	1	2	1	0	0	2	1	2	0	0	0	1	0	1	1	2	0	0	0	0	0	0	0	16	6.33424836662398e-05	1	1	0.000180388
4814	Glyma.07G157800	2	0	0	0	2	0	0	2	0	2	0	0	2	2	0	0	0	0	0	0	0	2	0	0	0	0	2	0	0	0	16	6.33424836662398e-05	1	1	0.000180388
4819	Glyma.07G158400	1	0	0	0	0	0	0	1	1	1	0	2	2	0	1	0	0	0	0	0	0	3	1	0	0	0	3	0	0	0	16	6.33424836662398e-05	1	1	0.000180388
4880	Glyma.07G171400	2	0	0	0	2	0	0	2	0	2	0	0	2	2	0	0	0	0	0	0	2	2	0	0	0	0	0	0	0	0	16	6.33424836662398e-05	1	1	0.000180388
4884	Glyma.07G172100	2	0	0	0	2	0	0	2	0	2	0	0	2	0	0	0	0	0	0	0	0	2	0	0	0	0	4	0	0	0	16	6.33424836662398e-05	1	1	0.000180388
4917	Glyma.07G180700	1	0	0	0	3	0	0	1	1	1	0	0	1	0	1	0	0	0	0	0	0	3	1	1	0	0	2	0	0	0	16	6.33424836662398e-05	1	1	0.000180388
4926	Glyma.07G185200	2	0	2	0	0	0	0	2	2	2	0	0	0	0	0	0	0	0	0	2	4	0	0	0	0	0	0	0	0	0	16	6.33424836662398e-05	1	1	0.000180388
5012	Glyma.07G209600	1	0	0	0	1	0	0	1	1	1	0	1	1	1	1	1	0	0	0	1	1	1	1	1	0	0	1	0	0	0	16	6.33424836662398e-05	1	1	0.000180388
5032	Glyma.07G214150	1	0	1	0	1	0	0	1	1	1	0	0	1	1	1	0	0	1	0	1	1	1	1	1	0	0	1	0	0	0	16	6.33424836662398e-05	1	1	0.000180388
5037	Glyma.07G218400	1	0	0	0	1	0	0	1	2	1	0	0	3	0	3	0	0	1	0	0	0	1	0	1	0	0	1	0	0	0	16	6.33424836662398e-05	1	1	0.000180388
5047	Glyma.07G227700	2	0	0	0	2	0	0	2	2	2	0	0	3	0	1	0	0	0	0	0	0	2	0	0	0	0	0	0	0	0	16	6.33424836662398e-05	1	1	0.000180388
5130	Glyma.08G026200	1	0	0	0	1	0	0	1	1	1	0	1	1	1	1	0	0	0	0	1	1	1	1	1	1	0	1	0	0	0	16	6.33424836662398e-05	1	1	0.000180388
5136	Glyma.08G028700	1	0	0	0	1	0	0	1	1	1	0	0	1	1	1	0	0	1	0	1	1	1	1	1	1	0	1	0	0	0	16	6.33424836662398e-05	1	1	0.000180388
5157	Glyma.08G035500	1	0	0	0	1	0	0	1	1	1	0	1	1	1	1	0	0	1	0	1	1	1	1	1	0	0	1	0	0	0	16	6.33424836662398e-05	1	1	0.000180388
5170	Glyma.08G049500	1	0	0	0	1	0	0	1	1	1	0	1	1	1	3	0	0	0	0	0	1	1	1	1	0	0	1	0	0	0	16	6.33424836662398e-05	1	1	0.000180388
5181	Glyma.08G059700	2	0	0	0	0	0	0	0	0	0	0	0	0	0	4	2	0	0	0	2	0	2	2	2	0	0	0	0	0	0	16	6.33424836662398e-05	1	1	0.000180388
5205	Glyma.08G083451	1	0	1	0	1	0	0	1	1	1	0	0	1	1	1	0	0	0	0	2	0	1	1	1	1	0	1	0	0	0	16	6.33424836662398e-05	1	1	0.000180388
5275	Glyma.08G135200	2	0	0	0	2	0	0	0	0	0	0	0	0	0	2	2	0	0	0	0	0	4	2	0	0	0	2	0	0	0	16	6.33424836662398e-05	1	1	0.000180388
5312	Glyma.08G158700	2	0	0	0	1	0	0	1	1	1	0	1	1	1	0	1	0	0	0	1	1	1	1	1	1	0	0	0	0	0	16	6.33424836662398e-05	1	1	0.000180388
5342	Glyma.08G188900	1	0	1	0	1	0	0	1	1	1	0	0	1	1	1	1	0	0	0	1	1	1	1	1	0	0	1	0	0	0	16	6.33424836662398e-05	1	1	0.000180388
5394	Glyma.08G221500	2	0	2	0	2	0	0	0	0	0	0	0	2	0	2	0	0	2	0	2	0	2	0	0	0	0	0	0	0	0	16	6.33424836662398e-05	1	1	0.000180388
5446	Glyma.08G243200	1	0	0	0	1	0	0	1	1	1	0	1	1	1	1	0	0	1	0	1	1	1	1	1	0	0	1	0	0	0	16	6.33424836662398e-05	1	1	0.000180388
5549	Glyma.08G273150	2	0	1	0	1	0	0	0	2	0	0	1	2	1	2	0	0	0	0	1	0	2	1	0	0	0	0	0	0	0	16	6.33424836662398e-05	1	1	0.000180388
5558	Glyma.08G277500	1	0	0	0	0	0	0	1	1	1	0	0	5	0	3	0	0	0	0	1	0	1	1	0	0	0	1	0	0	0	16	6.33424836662398e-05	1	1	0.000180388
5577	Glyma.08G288000	2	0	0	0	2	0	0	2	2	2	0	0	2	0	2	0	0	0	0	0	0	2	0	0	0	0	0	0	0	0	16	6.33424836662398e-05	1	1	0.000180388
5592	Glyma.08G293000	8	0	0	0	0	0	0	0	0	0	0	0	0	0	0	0	0	0	0	0	0	0	0	0	0	0	8	0	0	0	16	6.33424836662398e-05	1	1	0.000180388
5688	Glyma.08G319800	2	0	0	0	2	0	0	0	0	0	0	0	2	0	1	0	0	1	0	0	0	2	2	2	0	0	2	0	0	0	16	6.33424836662398e-05	1	1	0.000180388
5791	Glyma.08G363400	1	0	0	0	1	0	0	1	1	1	0	1	1	0	1	1	0	0	1	1	1	1	1	1	0	0	1	0	0	0	16	6.33424836662398e-05	1	1	0.000180388
5817	Glyma.09G015900	1	0	1	0	0	0	0	1	1	1	0	1	1	1	2	0	0	1	0	1	0	1	1	1	0	0	1	0	0	0	16	6.33424836662398e-05	1	1	0.000180388
5844	Glyma.09G022200	1	0	1	0	0	0	0	1	1	1	0	0	1	1	1	1	0	1	0	1	0	1	1	1	1	0	1	0	0	0	16	6.33424836662398e-05	1	1	0.000180388
5874	Glyma.09G039300	1	0	0	0	1	0	0	1	1	1	0	0	1	1	1	0	0	0	0	1	3	1	1	1	0	0	1	0	0	0	16	6.33424836662398e-05	1	1	0.000180388
5887	Glyma.09G048000	2	0	0	0	1	0	0	0	1	0	0	1	0	0	2	1	0	2	0	1	2	2	0	0	0	0	1	0	0	0	16	6.33424836662398e-05	1	1	0.000180388
6035	Glyma.09G087300	1	0	0	0	2	0	0	2	2	2	0	0	1	0	1	0	0	0	0	0	0	2	1	0	0	0	2	0	0	0	16	6.33424836662398e-05	1	1	0.000180388
6139	Glyma.09G118700	2	0	0	0	0	0	0	2	2	2	0	0	2	0	2	0	0	0	0	0	0	2	2	0	0	0	0	0	0	0	16	6.33424836662398e-05	1	1	0.000180388
6161	Glyma.09G126200	1	0	1	0	1	0	0	1	1	1	0	0	1	1	1	0	0	1	0	1	1	1	1	1	0	0	1	0	0	0	16	6.33424836662398e-05	1	1	0.000180388
6337	Glyma.09G183000	2	0	2	0	0	0	0	0	0	0	0	0	0	0	0	1	0	0	0	2	2	2	2	2	1	0	0	0	0	0	16	6.33424836662398e-05	1	1	0.000180388
6401	Glyma.09G205600	2	0	0	0	0	0	0	2	0	2	0	0	0	0	2	0	0	0	0	0	0	2	2	2	0	0	2	0	0	0	16	6.33424836662398e-05	1	1	0.000180388
6510	Glyma.09G239300	2	0	1	0	0	0	0	0	0	0	0	0	0	0	0	1	1	0	0	0	0	4	4	3	0	0	0	0	0	0	16	6.33424836662398e-05	1	1	0.000180388
6587	Glyma.09G273900	4	0	0	0	0	0	0	0	0	0	0	0	0	0	4	0	0	0	0	0	0	4	4	0	0	0	0	0	0	0	16	6.33424836662398e-05	1	1	0.000180388
6655	Glyma.10G031300	1	0	1	0	0	0	0	1	2	1	0	1	0	0	2	0	0	0	0	2	1	1	1	0	0	0	2	0	0	0	16	6.33424836662398e-05	1	1	0.000180388
6698	Glyma.10G047200	2	0	0	0	0	0	0	0	2	0	0	0	0	0	2	0	0	1	0	1	0	2	2	2	0	0	2	0	0	0	16	6.33424836662398e-05	1	1	0.000180388
6711	Glyma.10G053200	2	0	2	0	0	0	0	1	1	1	0	1	0	0	1	1	0	0	0	1	1	1	1	1	0	0	1	0	0	0	16	6.33424836662398e-05	1	1	0.000180388
6739	Glyma.10G067000	1	0	0	0	1	0	0	1	1	1	0	0	1	1	1	0	0	0	0	0	0	2	2	2	0	0	2	0	0	0	16	6.33424836662398e-05	1	1	0.000180388
6741	Glyma.10G067200	2	0	2	0	0	0	0	0	2	0	0	0	0	0	0	0	0	0	0	0	2	2	2	2	0	0	2	0	0	0	16	6.33424836662398e-05	1	1	0.000180388
6769	Glyma.10G080152	2	0	1	0	2	0	0	0	0	0	0	0	0	0	2	0	0	0	0	0	2	2	2	1	0	0	2	0	0	0	16	6.33424836662398e-05	1	1	0.000180388
6819	Glyma.10G091950	4	0	0	0	0	0	0	0	5	0	0	1	0	0	0	0	0	0	0	0	2	3	0	0	0	0	1	0	0	0	16	6.33424836662398e-05	1	1	0.000180388
6829	Glyma.10G093266	4	0	0	0	0	0	0	0	3	0	0	1	0	0	0	0	0	0	0	0	2	3	0	0	0	0	3	0	0	0	16	6.33424836662398e-05	1	1	0.000180388
6836	Glyma.10G094300	1	0	1	0	1	0	0	1	2	1	0	0	1	1	1	0	0	1	0	1	0	1	1	1	0	0	1	0	0	0	16	6.33424836662398e-05	1	1	0.000180388
6838	Glyma.10G094400	1	0	0	0	1	0	0	1	3	1	0	1	1	0	1	0	0	0	0	0	1	3	0	0	1	0	1	0	0	0	16	6.33424836662398e-05	1	1	0.000180388
6885	Glyma.10G102900	1	0	0	0	1	0	0	2	1	2	0	0	2	1	1	0	0	1	0	0	0	1	1	1	0	0	1	0	0	0	16	6.33424836662398e-05	1	1	0.000180388
6971	Glyma.10G122800	1	0	0	0	2	0	0	1	1	1	0	1	1	1	1	0	0	0	0	0	1	2	1	1	0	0	1	0	0	0	16	6.33424836662398e-05	1	1	0.000180388
6991	Glyma.10G127700	2	0	0	0	0	0	0	2	2	2	0	0	2	0	2	0	0	0	0	0	0	2	2	0	0	0	0	0	0	0	16	6.33424836662398e-05	1	1	0.000180388
7008	Glyma.10G130700	4	0	0	0	0	0	0	0	0	0	0	0	0	0	0	0	0	0	0	0	2	0	4	4	0	0	2	0	0	0	16	6.33424836662398e-05	1	1	0.000180388
7012	Glyma.10G131500	3	0	0	0	0	0	0	1	1	1	0	0	1	0	1	0	0	0	0	0	0	1	3	1	0	0	3	0	0	0	16	6.33424836662398e-05	1	1	0.000180388
7062	Glyma.10G151300	2	0	0	0	0	0	0	2	0	2	0	0	2	2	0	0	0	0	0	0	0	2	1	1	0	0	2	0	0	0	16	6.33424836662398e-05	1	1	0.000180388
7131	Glyma.10G186800	1	0	1	0	1	0	0	1	1	1	0	0	1	1	1	1	0	1	0	0	1	1	1	1	0	0	1	0	0	0	16	6.33424836662398e-05	1	1	0.000180388
7145	Glyma.10G194300	3	0	0	0	0	0	0	0	0	0	0	0	3	0	0	1	0	0	0	0	3	3	0	3	0	0	0	0	0	0	16	6.33424836662398e-05	1	1	0.000180388
7166	Glyma.10G205000	1	0	0	0	1	0	0	1	1	1	0	1	1	1	1	1	0	0	0	1	1	1	1	1	0	0	1	0	0	0	16	6.33424836662398e-05	1	1	0.000180388
7215	Glyma.10G229600	2	0	0	0	0	0	0	0	0	0	0	0	0	0	3	1	0	1	0	1	0	2	2	2	0	0	2	0	0	0	16	6.33424836662398e-05	1	1	0.000180388
7315	Glyma.10G272500	1	0	0	0	1	0	0	1	1	1	0	1	1	1	1	0	0	0	1	0	1	1	1	1	1	0	1	0	0	0	16	6.33424836662398e-05	1	1	0.000180388
7346	Glyma.11G015367	2	0	0	0	0	0	0	0	2	0	0	0	0	0	2	0	0	0	0	2	2	2	2	2	0	0	0	0	0	0	16	6.33424836662398e-05	1	1	0.000180388
7373	Glyma.11G031100	2	0	0	0	0	0	0	2	2	2	0	0	2	0	2	0	0	0	0	0	0	2	2	0	0	0	0	0	0	0	16	6.33424836662398e-05	1	1	0.000180388
7396	Glyma.11G054600	1	0	1	0	1	0	0	1	1	1	0	0	1	1	1	1	0	1	0	1	0	1	1	1	0	0	1	0	0	0	16	6.33424836662398e-05	1	1	0.000180388
7442	Glyma.11G088800	2	0	0	0	0	0	0	2	2	2	0	1	2	1	2	2	0	0	0	0	0	0	0	0	0	0	0	0	0	0	16	6.33424836662398e-05	1	1	0.000180388
7653	Glyma.11G170300	3	0	2	0	0	0	0	2	2	2	0	0	2	1	0	0	0	0	0	0	0	2	0	0	0	0	0	0	0	0	16	6.33424836662398e-05	1	1	0.000180388
7697	Glyma.11G183400	1	0	0	0	1	0	0	1	1	1	0	0	1	0	4	0	0	0	0	1	1	1	1	1	0	0	1	0	0	0	16	6.33424836662398e-05	1	1	0.000180388
7744	Glyma.11G205400	2	0	1	0	1	0	0	1	1	1	0	0	3	0	3	0	0	0	0	0	0	1	1	0	0	0	1	0	0	0	16	6.33424836662398e-05	1	1	0.000180388
7772	Glyma.11G222700	4	0	0	0	0	0	0	0	0	0	0	0	0	4	0	0	0	0	0	0	4	4	0	0	0	0	0	0	0	0	16	6.33424836662398e-05	1	1	0.000180388
7785	Glyma.11G227800	2	0	0	0	0	0	0	0	2	0	0	0	0	2	2	0	0	0	0	2	0	2	2	2	0	0	0	0	0	0	16	6.33424836662398e-05	1	1	0.000180388
7791	Glyma.11G229000	4	0	0	0	0	0	0	0	4	0	0	0	0	2	0	0	0	0	0	2	0	2	0	0	2	0	0	0	0	0	16	6.33424836662398e-05	1	1	0.000180388
7808	Glyma.11G235700	2	0	0	0	2	0	0	2	0	2	0	0	0	0	0	0	0	0	0	0	0	0	2	2	2	0	2	0	0	0	16	6.33424836662398e-05	1	1	0.000180388
7809	Glyma.11G235800	1	0	0	0	1	0	0	1	1	1	0	0	1	1	1	1	0	0	0	1	1	1	1	2	0	0	1	0	0	0	16	6.33424836662398e-05	1	1	0.000180388
7817	Glyma.11G239800	2	0	0	0	0	0	0	0	2	0	2	0	0	0	4	2	0	0	0	2	0	0	2	0	0	0	0	0	0	0	16	6.33424836662398e-05	1	1	0.000180388
7820	Glyma.11G241900	2	0	0	0	0	0	0	0	2	0	0	0	0	2	2	0	0	2	0	2	0	2	2	0	0	0	0	0	0	0	16	6.33424836662398e-05	1	1	0.000180388
7893	Glyma.12G022100	1	0	0	0	0	0	0	2	0	2	0	0	0	0	2	0	0	0	0	2	0	0	2	2	1	0	2	0	0	0	16	6.33424836662398e-05	1	1	0.000180388
7908	Glyma.12G038300	1	0	1	0	1	0	0	1	1	1	0	1	1	0	1	0	0	0	0	1	1	1	1	1	1	0	1	0	0	0	16	6.33424836662398e-05	1	1	0.000180388
7915	Glyma.12G040600	2	0	0	0	1	0	0	1	1	1	0	0	2	0	2	0	0	0	0	0	1	2	1	0	1	0	1	0	0	0	16	6.33424836662398e-05	1	1	0.000180388
7944	Glyma.12G056900	4	0	0	0	0	0	0	0	4	0	0	0	4	0	4	0	0	0	0	0	0	0	0	0	0	0	0	0	0	0	16	6.33424836662398e-05	1	1	0.000180388
7954	Glyma.12G067100	1	0	0	0	1	0	0	1	1	1	0	0	1	1	3	0	0	1	0	0	0	1	1	1	1	0	1	0	0	0	16	6.33424836662398e-05	1	1	0.000180388
7968	Glyma.12G083902	4	0	0	0	0	0	0	4	0	4	0	4	0	0	0	0	0	0	0	0	0	0	0	0	0	0	0	0	0	0	16	6.33424836662398e-05	1	1	0.000180388
7974	Glyma.12G085500	1	0	0	0	1	0	0	1	1	1	0	0	1	1	1	0	0	1	0	1	1	1	1	1	1	0	1	0	0	0	16	6.33424836662398e-05	1	1	0.000180388
7979	Glyma.12G087000	1	0	1	0	1	0	0	1	1	1	0	1	1	1	1	0	0	0	0	1	1	1	1	1	0	0	1	0	0	0	16	6.33424836662398e-05	1	1	0.000180388
7994	Glyma.12G094950	1	0	0	0	1	0	0	1	1	1	0	1	1	1	3	0	0	0	0	1	0	1	1	1	0	0	1	0	0	0	16	6.33424836662398e-05	1	1	0.000180388
8001	Glyma.12G096900	2	0	0	0	0	0	0	0	2	0	0	0	0	2	2	0	0	2	0	0	2	0	0	2	0	0	2	0	0	0	16	6.33424836662398e-05	1	1	0.000180388
8056	Glyma.12G117300	2	0	0	0	0	0	0	0	0	0	0	0	2	0	2	0	0	0	0	0	0	2	4	4	0	0	0	0	0	0	16	6.33424836662398e-05	1	1	0.000180388
8071	Glyma.12G128800	4	0	0	0	0	0	0	4	0	4	0	0	0	0	4	0	0	0	0	0	0	0	0	0	0	0	0	0	0	0	16	6.33424836662398e-05	1	1	0.000180388
8126	Glyma.12G145300	2	0	0	0	1	0	0	2	1	2	0	0	1	1	2	0	0	0	0	0	0	1	2	1	0	0	0	0	0	0	16	6.33424836662398e-05	1	1	0.000180388
8132	Glyma.12G147600	1	0	0	0	1	0	0	1	1	1	0	0	1	1	1	0	0	1	0	1	1	1	1	1	1	0	1	0	0	0	16	6.33424836662398e-05	1	1	0.000180388
8163	Glyma.12G157032	6	0	0	0	0	0	0	1	0	1	0	0	3	0	3	0	0	1	0	0	0	0	1	0	0	0	0	0	0	0	16	6.33424836662398e-05	1	1	0.000180388
8171	Glyma.12G158900	2	0	0	0	1	0	0	1	1	1	0	0	2	1	1	0	0	1	0	0	0	2	1	1	0	0	1	0	0	0	16	6.33424836662398e-05	1	1	0.000180388
8191	Glyma.12G162700	2	0	0	0	0	0	0	2	1	2	0	0	3	0	3	0	0	0	0	0	0	1	1	0	0	0	1	0	0	0	16	6.33424836662398e-05	1	1	0.000180388
8232	Glyma.12G181000	8	0	0	0	0	0	0	0	8	0	0	0	0	0	0	0	0	0	0	0	0	0	0	0	0	0	0	0	0	0	16	6.33424836662398e-05	1	1	0.000180388
8289	Glyma.12G212802	1	0	1	0	1	0	0	1	1	1	0	0	1	1	1	0	0	1	0	1	1	1	1	1	0	0	1	0	0	0	16	6.33424836662398e-05	1	1	0.000180388
8301	Glyma.12G216300	2	0	0	0	1	0	0	1	2	1	0	0	1	0	1	0	1	0	0	1	0	2	1	1	0	0	1	0	0	0	16	6.33424836662398e-05	1	1	0.000180388
8319	Glyma.12G226200	2	0	0	0	2	0	0	2	0	2	0	0	2	0	0	2	0	0	0	2	2	0	0	0	0	0	0	0	0	0	16	6.33424836662398e-05	1	1	0.000180388
8407	Glyma.13G009800	2	0	1	0	0	0	0	1	2	1	1	0	1	1	1	0	0	1	0	0	0	1	1	1	0	0	1	0	0	0	16	6.33424836662398e-05	1	1	0.000180388
8500	Glyma.13G047400	4	0	4	0	0	0	0	0	0	0	0	0	0	0	4	4	0	0	0	0	0	0	0	0	0	0	0	0	0	0	16	6.33424836662398e-05	1	1	0.000180388
8513	Glyma.13G049800	2	0	2	0	0	0	0	0	2	0	0	2	0	0	2	0	0	0	0	0	2	2	0	0	0	0	2	0	0	0	16	6.33424836662398e-05	1	1	0.000180388
8549	Glyma.13G056033	2	0	1	0	1	0	0	1	0	1	0	1	1	1	2	1	0	0	0	1	0	1	0	1	0	0	1	0	0	0	16	6.33424836662398e-05	1	1	0.000180388
8552	Glyma.13G056200	1	0	1	0	0	0	0	0	2	0	0	1	0	0	1	0	0	0	1	0	2	2	2	2	0	0	1	0	0	0	16	6.33424836662398e-05	1	1	0.000180388
8558	Glyma.13G057700	1	0	1	0	1	0	0	1	1	1	0	1	1	0	1	0	0	0	0	1	1	1	1	1	1	0	1	0	0	0	16	6.33424836662398e-05	1	1	0.000180388
8560	Glyma.13G058002	1	0	0	0	1	0	0	1	1	1	0	1	1	0	1	1	0	0	1	1	1	1	1	1	0	0	1	0	0	0	16	6.33424836662398e-05	1	1	0.000180388
8642	Glyma.13G088100	1	0	0	0	1	0	0	1	1	1	0	0	1	0	1	0	0	0	0	0	0	4	3	1	0	0	1	0	0	0	16	6.33424836662398e-05	1	1	0.000180388
8655	Glyma.13G095500	1	0	0	0	1	0	0	1	1	1	0	1	1	1	1	1	0	0	0	1	1	1	1	1	0	0	1	0	0	0	16	6.33424836662398e-05	1	1	0.000180388
8663	Glyma.13G098600	2	0	0	0	0	0	0	2	1	2	0	0	1	0	2	0	0	1	0	1	0	1	1	1	0	0	1	0	0	0	16	6.33424836662398e-05	1	1	0.000180388
8753	Glyma.13G138900	2	0	0	0	0	0	0	2	0	2	0	0	0	0	0	0	0	0	0	2	2	0	2	2	0	0	2	0	0	0	16	6.33424836662398e-05	1	1	0.000180388
8758	Glyma.13G141000	1	0	0	0	1	0	0	1	1	1	0	1	1	1	1	0	0	1	0	1	1	1	1	1	0	0	1	0	0	0	16	6.33424836662398e-05	1	1	0.000180388
8777	Glyma.13G153086	1	0	0	0	0	0	0	1	2	1	0	0	1	0	3	0	0	0	0	2	0	2	2	0	0	0	1	0	0	0	16	6.33424836662398e-05	1	1	0.000180388
8839	Glyma.13G173301	3	0	0	0	0	0	0	0	2	0	0	0	0	1	3	0	0	0	0	0	2	1	3	1	0	0	0	0	0	0	16	6.33424836662398e-05	1	1	0.000180388
8846	Glyma.13G174800	1	0	0	0	0	0	0	5	0	5	0	1	1	1	0	0	1	0	0	0	0	0	0	1	0	0	0	0	0	0	16	6.33424836662398e-05	1	1	0.000180388
8876	Glyma.13G183600	2	0	1	0	1	0	0	0	1	0	0	1	2	1	2	0	0	0	0	0	0	2	1	1	0	0	1	0	0	0	16	6.33424836662398e-05	1	1	0.000180388
8891	Glyma.13G186000	1	0	1	0	0	0	0	0	1	0	0	1	2	2	1	0	0	0	0	0	1	1	2	2	0	0	1	0	0	0	16	6.33424836662398e-05	1	1	0.000180388
8932	Glyma.13G195600	2	0	0	0	0	0	0	0	2	0	0	0	0	0	2	0	0	2	0	0	0	2	2	0	4	0	0	0	0	0	16	6.33424836662398e-05	1	1	0.000180388
8960	Glyma.13G201300	1	0	0	0	1	0	0	1	1	1	0	1	1	1	1	0	0	1	0	1	1	1	1	1	0	0	1	0	0	0	16	6.33424836662398e-05	1	1	0.000180388
8990	Glyma.13G208400	1	0	0	0	1	0	0	1	1	1	0	0	2	0	1	0	0	2	0	0	0	1	2	0	1	0	2	0	0	0	16	6.33424836662398e-05	1	1	0.000180388
9014	Glyma.13G216800	2	0	0	0	0	0	0	0	2	0	0	0	0	0	0	2	0	0	0	0	2	2	2	2	0	0	2	0	0	0	16	6.33424836662398e-05	1	1	0.000180388
9084	Glyma.13G248400	2	0	0	0	0	0	0	2	2	2	0	0	0	0	0	0	0	1	0	1	1	2	1	0	0	0	2	0	0	0	16	6.33424836662398e-05	1	1	0.000180388
9086	Glyma.13G251200	1	0	1	0	1	0	0	1	1	1	0	1	1	0	1	0	0	1	0	1	1	1	1	1	0	0	1	0	0	0	16	6.33424836662398e-05	1	1	0.000180388
9127	Glyma.13G269100	1	0	1	0	1	0	0	1	1	1	0	0	1	0	1	0	0	1	0	1	0	3	1	1	0	0	1	0	0	0	16	6.33424836662398e-05	1	1	0.000180388
9131	Glyma.13G271500	1	0	0	0	1	0	0	1	1	1	0	1	1	0	1	0	0	1	1	1	1	1	1	1	0	0	1	0	0	0	16	6.33424836662398e-05	1	1	0.000180388
9134	Glyma.13G272250	1	0	1	0	1	0	0	1	1	1	0	1	1	0	1	0	0	1	0	1	0	1	1	1	1	0	1	0	0	0	16	6.33424836662398e-05	1	1	0.000180388
9142	Glyma.13G274300	1	0	1	0	1	0	0	1	1	1	0	1	1	1	1	1	0	0	0	1	0	1	1	1	0	0	1	0	0	0	16	6.33424836662398e-05	1	1	0.000180388
9156	Glyma.13G277800	1	0	0	0	1	0	0	1	1	1	0	1	1	0	1	1	0	1	0	1	1	1	1	1	0	0	1	0	0	0	16	6.33424836662398e-05	1	1	0.000180388
9190	Glyma.13G299300	1	0	0	0	1	0	0	1	1	1	0	0	1	1	1	0	0	1	0	1	1	1	1	1	1	0	1	0	0	0	16	6.33424836662398e-05	1	1	0.000180388
9288	Glyma.14G008500	2	0	0	0	2	0	0	1	2	1	0	1	0	0	1	0	0	0	0	1	0	1	1	2	0	0	1	0	0	0	16	6.33424836662398e-05	1	1	0.000180388
9368	Glyma.14G047000	2	0	1	0	0	0	0	1	1	1	1	0	3	3	1	0	0	0	0	1	1	0	0	0	0	0	0	0	0	0	16	6.33424836662398e-05	1	1	0.000180388
9387	Glyma.14G050600	1	0	0	0	1	0	0	2	1	2	0	0	1	0	1	0	0	0	0	1	1	1	1	1	1	0	1	0	0	0	16	6.33424836662398e-05	1	1	0.000180388
9492	Glyma.14G085400	1	0	0	0	1	0	0	1	1	1	0	1	1	1	1	1	0	0	0	1	1	1	1	1	0	0	1	0	0	0	16	6.33424836662398e-05	1	1	0.000180388
9497	Glyma.14G086300	4	0	0	0	0	0	0	0	0	0	0	0	0	0	0	0	0	0	0	0	0	4	4	0	0	0	4	0	0	0	16	6.33424836662398e-05	1	1	0.000180388
9534	Glyma.14G097800	1	0	0	0	1	0	0	1	1	1	0	0	1	1	1	0	0	1	0	1	1	1	1	1	1	0	1	0	0	0	16	6.33424836662398e-05	1	1	0.000180388
9566	Glyma.14G113701	1	0	1	0	0	0	0	2	1	2	0	0	0	1	1	1	1	2	0	0	1	2	0	0	0	0	0	0	0	0	16	6.33424836662398e-05	1	1	0.000180388
9570	Glyma.14G115500	2	0	1	0	0	0	0	2	2	2	0	0	0	2	2	1	0	0	0	0	1	1	0	0	0	0	0	0	0	0	16	6.33424836662398e-05	1	1	0.000180388
9668	Glyma.14G142400	2	0	0	0	0	0	0	2	2	2	0	0	1	0	3	0	0	0	0	0	0	4	0	0	0	0	0	0	0	0	16	6.33424836662398e-05	1	1	0.000180388
9670	Glyma.14G143000	1	0	0	0	1	0	0	1	1	1	0	0	1	0	3	0	0	0	0	0	1	3	1	1	0	0	1	0	0	0	16	6.33424836662398e-05	1	1	0.000180388
9776	Glyma.14G181000	1	0	1	0	0	0	0	1	1	1	0	0	1	1	1	0	0	1	1	1	1	0	1	1	1	0	1	0	0	0	16	6.33424836662398e-05	1	1	0.000180388
9804	Glyma.14G201300	2	0	0	0	1	0	0	1	1	1	0	0	1	1	1	1	0	0	0	0	0	3	1	1	0	0	1	0	0	0	16	6.33424836662398e-05	1	1	0.000180388
9817	Glyma.14G206900	1	0	0	0	1	0	0	2	1	2	0	0	1	1	1	0	0	1	0	1	1	1	1	0	0	0	1	0	0	0	16	6.33424836662398e-05	1	1	0.000180388
9829	Glyma.14G211000	2	0	2	0	2	0	0	2	0	2	0	0	0	2	2	0	0	0	0	0	0	0	0	0	0	0	2	0	0	0	16	6.33424836662398e-05	1	1	0.000180388
9870	Glyma.15G009400	1	0	1	0	1	0	0	1	1	1	0	1	1	1	1	0	0	0	0	1	1	1	1	1	0	0	1	0	0	0	16	6.33424836662398e-05	1	1	0.000180388
9875	Glyma.15G012100	2	0	0	0	0	0	0	2	3	2	0	0	2	1	0	0	0	0	0	0	0	0	2	0	0	0	2	0	0	0	16	6.33424836662398e-05	1	1	0.000180388
9915	Glyma.15G052600	1	0	0	0	1	0	0	1	1	1	0	1	1	1	1	0	0	1	0	1	1	1	1	1	0	0	1	0	0	0	16	6.33424836662398e-05	1	1	0.000180388
9961	Glyma.15G088600	1	0	0	0	0	0	0	1	1	1	0	1	1	1	1	0	0	1	0	0	0	1	2	2	0	0	2	0	0	0	16	6.33424836662398e-05	1	1	0.000180388
10016	Glyma.15G114600	1	0	0	1	0	0	0	1	2	1	1	1	1	3	1	2	0	0	0	0	1	0	0	0	0	0	0	0	0	0	16	6.33424836662398e-05	1	1	0.000180388
10020	Glyma.15G116500	1	0	0	0	0	0	0	1	1	1	0	1	1	1	1	0	0	1	0	1	1	1	1	1	1	0	1	0	0	0	16	6.33424836662398e-05	1	1	0.000180388
10032	Glyma.15G118800	1	0	1	0	0	0	0	1	1	1	0	0	1	1	1	0	0	1	0	1	1	1	1	1	1	0	1	0	0	0	16	6.33424836662398e-05	1	1	0.000180388
10057	Glyma.15G123300	1	0	0	0	0	0	0	1	1	1	1	0	1	1	1	1	0	1	0	1	1	1	1	1	0	0	1	0	0	0	16	6.33424836662398e-05	1	1	0.000180388
10058	Glyma.15G123400	1	0	0	0	0	0	0	1	1	1	0	0	1	1	1	1	0	1	0	1	1	1	1	1	1	0	1	0	0	0	16	6.33424836662398e-05	1	1	0.000180388
10125	Glyma.15G150700	1	0	0	0	2	0	0	0	1	0	0	0	1	1	1	0	0	1	0	1	1	1	2	1	1	0	1	0	0	0	16	6.33424836662398e-05	1	1	0.000180388
10140	Glyma.15G155000	2	0	0	0	1	0	0	0	2	0	0	0	2	0	2	0	0	0	0	0	1	2	1	1	0	0	2	0	0	0	16	6.33424836662398e-05	1	1	0.000180388
10171	Glyma.15G159400	1	0	0	0	0	0	0	1	1	1	0	1	1	1	1	1	0	0	0	1	1	1	1	1	1	0	1	0	0	0	16	6.33424836662398e-05	1	1	0.000180388
10179	Glyma.15G160950	3	0	0	0	0	0	0	1	1	1	0	0	3	0	3	0	0	0	0	0	0	2	1	0	0	0	1	0	0	0	16	6.33424836662398e-05	1	1	0.000180388
10185	Glyma.15G161900	2	0	0	0	0	0	0	1	2	1	0	0	2	1	0	0	0	0	1	1	0	2	1	1	0	0	1	0	0	0	16	6.33424836662398e-05	1	1	0.000180388
10412	Glyma.15G225000	1	0	0	0	0	0	0	4	1	4	0	0	1	0	1	0	0	0	0	0	0	1	3	0	0	0	0	0	0	0	16	6.33424836662398e-05	1	1	0.000180388
10453	Glyma.15G233500	1	0	0	0	1	0	0	3	2	3	0	0	3	0	1	0	0	0	0	0	1	1	0	0	0	0	0	0	0	0	16	6.33424836662398e-05	1	1	0.000180388
10468	Glyma.15G239400	2	0	0	0	1	0	0	1	1	1	0	0	2	0	3	1	0	0	0	0	0	1	1	1	0	0	1	0	0	0	16	6.33424836662398e-05	1	1	0.000180388
10552	Glyma.15G265200	2	0	2	0	1	0	0	2	2	2	0	0	0	0	1	0	0	1	0	0	2	0	0	0	0	0	1	0	0	0	16	6.33424836662398e-05	1	1	0.000180388
10565	Glyma.15G267000	1	0	0	0	0	0	0	2	1	2	0	1	2	1	2	0	0	0	0	0	1	2	1	0	0	0	0	0	0	0	16	6.33424836662398e-05	1	1	0.000180388
10593	Glyma.16G008500	2	0	0	0	1	0	0	1	1	1	0	0	2	1	2	1	0	0	0	0	0	1	1	1	0	0	1	0	0	0	16	6.33424836662398e-05	1	1	0.000180388
10647	Glyma.16G026400	1	0	0	0	1	0	0	1	1	1	0	1	1	1	1	1	0	1	0	1	1	1	0	0	1	0	1	0	0	0	16	6.33424836662398e-05	1	1	0.000180388
10678	Glyma.16G034400	4	0	0	0	4	0	0	0	4	0	0	0	0	0	0	0	0	0	0	0	0	4	0	0	0	0	0	0	0	0	16	6.33424836662398e-05	1	1	0.000180388
10707	Glyma.16G046300	1	0	0	0	1	0	0	0	1	0	0	0	0	0	3	2	0	0	0	0	3	4	0	0	0	0	1	0	0	0	16	6.33424836662398e-05	1	1	0.000180388
10840	Glyma.16G078500	2	0	0	0	0	0	0	0	2	0	0	0	2	0	2	0	0	2	0	0	0	2	2	2	0	0	0	0	0	0	16	6.33424836662398e-05	1	1	0.000180388
10864	Glyma.16G082600	2	0	0	0	2	0	0	0	2	0	0	0	2	2	2	0	0	0	0	0	0	2	2	0	0	0	0	0	0	0	16	6.33424836662398e-05	1	1	0.000180388
10877	Glyma.16G085300	2	0	0	0	0	0	0	1	1	1	0	0	2	0	3	0	0	0	0	1	1	2	1	1	0	0	0	0	0	0	16	6.33424836662398e-05	1	1	0.000180388
11030	Glyma.16G117700	3	0	0	0	0	0	0	1	1	1	0	0	3	0	3	0	0	0	0	0	0	1	1	1	0	0	1	0	0	0	16	6.33424836662398e-05	1	1	0.000180388
11374	Glyma.16G217100	1	0	0	0	1	0	0	1	2	1	0	0	1	0	1	0	0	0	0	1	2	1	1	1	1	0	1	0	0	0	16	6.33424836662398e-05	1	1	0.000180388
11387	Glyma.16G220700	4	0	0	0	0	0	0	0	0	0	0	4	0	0	0	4	0	0	0	0	0	0	0	4	0	0	0	0	0	0	16	6.33424836662398e-05	1	1	0.000180388
11442	Glyma.17G072700	1	0	0	0	0	0	0	1	1	1	0	1	1	1	1	0	0	1	0	1	1	1	1	1	1	0	1	0	0	0	16	6.33424836662398e-05	1	1	0.000180388
11521	Glyma.17G155300	1	0	0	0	1	0	0	1	1	1	0	1	1	1	1	0	0	1	0	1	1	1	1	1	0	0	1	0	0	0	16	6.33424836662398e-05	1	1	0.000180388
11522	Glyma.17G155350	1	0	0	0	1	0	0	1	1	1	0	0	1	1	1	0	0	1	0	1	1	1	1	1	1	0	1	0	0	0	16	6.33424836662398e-05	1	1	0.000180388
11603	Glyma.17G180400	1	0	0	0	1	0	0	1	1	1	0	1	1	1	2	0	0	0	0	0	2	1	1	0	0	0	2	0	0	0	16	6.33424836662398e-05	1	1	0.000180388
11608	Glyma.17G181000	1	0	0	0	0	0	0	1	0	1	0	0	3	0	4	0	0	0	0	0	0	0	1	1	0	0	4	0	0	0	16	6.33424836662398e-05	1	1	0.000180388
11735	Glyma.17G211500	2	0	0	0	0	0	0	2	0	2	0	1	0	0	1	1	0	0	0	0	0	2	2	2	0	0	1	0	0	0	16	6.33424836662398e-05	1	1	0.000180388
11742	Glyma.17G212400	2	0	0	0	0	0	0	2	0	2	0	2	0	0	2	0	0	0	0	0	2	2	0	0	0	0	2	0	0	0	16	6.33424836662398e-05	1	1	0.000180388
11782	Glyma.17G228451	1	0	0	0	0	0	0	1	0	1	0	1	1	1	1	1	0	1	0	1	1	1	1	1	1	0	1	0	0	0	16	6.33424836662398e-05	1	1	0.000180388
11844	Glyma.17G244900	4	0	0	0	0	0	0	0	2	0	0	0	0	0	4	0	0	0	0	2	0	0	2	2	0	0	0	0	0	0	16	6.33424836662398e-05	1	1	0.000180388
11872	Glyma.18G010000	2	0	0	0	0	0	0	0	4	0	0	0	0	0	0	0	0	2	0	0	0	4	2	0	0	0	2	0	0	0	16	6.33424836662398e-05	1	1	0.000180388
11925	Glyma.18G030800	1	0	1	0	0	0	0	1	1	1	0	0	0	0	2	0	0	0	0	2	1	1	2	1	0	0	2	0	0	0	16	6.33424836662398e-05	1	1	0.000180388
11926	Glyma.18G031400	1	0	0	0	0	0	0	2	2	2	0	3	0	0	0	0	1	0	0	0	1	0	0	4	0	0	0	0	0	0	16	6.33424836662398e-05	1	1	0.000180388
11949	Glyma.18G040600	2	0	0	0	0	0	0	0	2	0	0	0	2	0	2	0	0	0	0	0	0	2	2	2	2	0	0	0	0	0	16	6.33424836662398e-05	1	1	0.000180388
11950	Glyma.18G040700	2	0	0	0	0	0	0	0	1	0	0	3	1	1	1	1	0	0	0	0	0	1	2	1	2	0	0	0	0	0	16	6.33424836662398e-05	1	1	0.000180388
11978	Glyma.18G055400	1	0	0	0	1	0	0	1	1	1	0	1	1	0	1	1	0	0	0	1	1	1	1	1	1	0	1	0	0	0	16	6.33424836662398e-05	1	1	0.000180388
11986	Glyma.18G057000	1	0	1	0	1	0	0	1	1	1	0	1	1	0	1	0	0	0	0	1	1	1	1	1	0	0	2	0	0	0	16	6.33424836662398e-05	1	1	0.000180388
12055	Glyma.18G080400	1	0	0	0	2	0	0	0	0	0	0	0	2	0	2	0	0	0	0	1	1	2	2	1	0	0	2	0	0	0	16	6.33424836662398e-05	1	1	0.000180388
12089	Glyma.18G086800	4	0	0	0	0	0	0	2	2	2	0	0	4	0	0	0	0	0	0	0	0	2	0	0	0	0	0	0	0	0	16	6.33424836662398e-05	1	1	0.000180388
12110	Glyma.18G091750	1	0	0	0	1	0	0	0	3	0	0	1	1	1	1	0	0	0	0	1	2	1	0	1	1	0	1	0	0	0	16	6.33424836662398e-05	1	1	0.000180388
12231	Glyma.18G129900	4	0	0	0	0	0	0	6	0	6	0	0	0	0	0	0	0	0	0	0	0	0	0	0	0	0	0	0	0	0	16	6.33424836662398e-05	1	1	0.000180388
12238	Glyma.18G131300	1	0	0	0	1	0	0	1	1	1	0	1	1	1	1	0	0	1	0	1	1	1	1	1	0	0	1	0	0	0	16	6.33424836662398e-05	1	1	0.000180388
12390	Glyma.18G158700	2	0	0	0	0	0	0	0	2	0	0	0	2	2	2	0	0	0	0	0	0	2	2	0	0	0	2	0	0	0	16	6.33424836662398e-05	1	1	0.000180388
12442	Glyma.18G173700	1	0	0	0	1	0	0	1	1	1	0	1	1	1	1	0	0	1	0	1	0	1	1	1	1	0	1	0	0	0	16	6.33424836662398e-05	1	1	0.000180388
12473	Glyma.18G180500	1	0	0	0	1	0	0	1	1	1	0	1	1	1	1	0	0	0	0	2	1	1	1	1	0	0	1	0	0	0	16	6.33424836662398e-05	1	1	0.000180388
12485	Glyma.18G181900	1	0	0	0	1	0	0	0	2	0	0	0	2	1	0	0	0	0	0	0	1	2	2	2	0	0	2	0	0	0	16	6.33424836662398e-05	1	1	0.000180388
12546	Glyma.18G192450	2	0	0	0	3	0	0	0	0	0	0	0	3	0	2	0	0	0	0	0	0	3	0	0	3	0	0	0	0	0	16	6.33424836662398e-05	1	1	0.000180388
12596	Glyma.18G201500	2	0	0	0	3	0	0	0	0	0	0	0	3	0	1	0	0	0	0	1	0	3	1	1	0	0	1	0	0	0	16	6.33424836662398e-05	1	1	0.000180388
12612	Glyma.18G203550	6	0	0	0	0	0	0	0	0	0	0	2	0	0	2	0	0	0	0	2	2	2	0	0	0	0	0	0	0	0	16	6.33424836662398e-05	1	1	0.000180388
12619	Glyma.18G204200	1	0	0	0	1	0	0	1	1	1	0	1	1	1	2	0	0	0	1	0	1	2	0	1	0	0	1	0	0	0	16	6.33424836662398e-05	1	1	0.000180388
12658	Glyma.18G217500	4	0	0	0	0	0	0	0	0	0	0	0	0	0	0	0	0	0	0	0	4	0	8	0	0	0	0	0	0	0	16	6.33424836662398e-05	1	1	0.000180388
12716	Glyma.18G230600	2	0	0	0	0	0	0	1	0	1	0	1	0	1	2	1	0	0	0	1	0	1	2	1	1	0	1	0	0	0	16	6.33424836662398e-05	1	1	0.000180388
12750	Glyma.18G236650	1	0	0	0	0	0	0	0	0	0	0	0	0	1	3	2	0	0	0	0	3	0	3	2	0	0	1	0	0	0	16	6.33424836662398e-05	1	1	0.000180388
12794	Glyma.18G246100	1	0	1	0	0	0	0	1	0	1	0	0	0	1	2	2	0	0	0	0	0	2	2	2	1	0	0	0	0	0	16	6.33424836662398e-05	1	1	0.000180388
12801	Glyma.18G247600	2	0	0	0	0	0	0	2	0	2	0	1	0	1	2	0	0	0	0	1	0	2	2	1	0	0	0	0	0	0	16	6.33424836662398e-05	1	1	0.000180388
12873	Glyma.18G267800	1	0	0	0	2	0	0	0	0	0	0	2	2	2	0	1	0	0	1	1	0	2	0	1	1	0	0	0	0	0	16	6.33424836662398e-05	1	1	0.000180388
12881	Glyma.18G269700	2	0	1	0	1	0	0	1	0	1	0	0	1	0	1	0	0	0	0	1	0	2	2	1	1	0	1	0	0	0	16	6.33424836662398e-05	1	1	0.000180388
12903	Glyma.18G275900	4	0	0	0	0	0	0	0	0	0	0	0	0	0	0	0	0	0	0	0	0	4	4	4	0	0	0	0	0	0	16	6.33424836662398e-05	1	1	0.000180388
12984	Glyma.19G015600	4	0	0	0	0	0	0	0	4	0	0	0	0	0	0	0	0	0	0	2	0	2	4	0	0	0	0	0	0	0	16	6.33424836662398e-05	1	1	0.000180388
13016	Glyma.19G025500	1	0	0	0	0	0	0	1	1	1	0	0	1	1	2	0	0	0	0	1	1	2	1	1	0	0	2	0	0	0	16	6.33424836662398e-05	1	1	0.000180388
13032	Glyma.19G031300	1	0	0	0	1	0	0	2	1	2	0	1	1	1	1	0	0	1	0	0	0	2	1	0	0	0	1	0	0	0	16	6.33424836662398e-05	1	1	0.000180388
13211	Glyma.19G072702	2	0	0	0	0	0	0	0	2	0	0	0	2	2	2	0	0	0	0	2	0	2	2	0	0	0	0	0	0	0	16	6.33424836662398e-05	1	1	0.000180388
13252	Glyma.19G082700	1	0	0	0	1	0	0	1	1	1	0	1	1	1	2	0	0	1	0	1	0	1	1	1	0	0	1	0	0	0	16	6.33424836662398e-05	1	1	0.000180388
13268	Glyma.19G089600	1	0	0	0	1	0	0	1	2	1	0	1	1	1	2	0	0	0	0	0	1	1	1	1	0	0	1	0	0	0	16	6.33424836662398e-05	1	1	0.000180388
13298	Glyma.19G100000	2	0	0	0	0	0	0	2	0	2	0	0	2	2	2	0	0	0	0	0	0	2	0	0	0	0	2	0	0	0	16	6.33424836662398e-05	1	1	0.000180388
13320	Glyma.19G106200	2	0	2	0	0	0	0	0	0	0	0	0	0	0	2	0	0	0	0	1	0	4	2	1	0	0	2	0	0	0	16	6.33424836662398e-05	1	1	0.000180388
13405	Glyma.19G138000	2	0	2	0	0	0	0	2	0	2	0	2	2	2	0	0	0	0	0	0	0	0	0	0	0	0	2	0	0	0	16	6.33424836662398e-05	1	1	0.000180388
13452	Glyma.19G159600	1	0	0	0	1	0	0	1	1	1	0	0	1	1	1	0	0	1	0	1	1	1	1	1	1	0	1	0	0	0	16	6.33424836662398e-05	1	1	0.000180388
13499	Glyma.19G180400	2	0	0	0	0	0	0	2	2	2	0	2	0	0	2	0	0	0	0	0	2	2	0	0	0	0	0	0	0	0	16	6.33424836662398e-05	1	1	0.000180388
13500	Glyma.19G181000	2	0	0	0	0	0	0	2	2	2	0	2	0	0	2	0	0	0	0	0	2	2	0	0	0	0	0	0	0	0	16	6.33424836662398e-05	1	1	0.000180388
13543	Glyma.19G199300	1	0	1	0	1	0	0	1	1	1	0	0	0	0	1	0	0	0	0	1	1	2	1	1	2	0	1	0	0	0	16	6.33424836662398e-05	1	1	0.000180388
13642	Glyma.19G244800	2	0	0	0	0	0	0	2	2	2	0	0	2	0	2	0	0	0	0	0	0	2	2	0	0	0	0	0	0	0	16	6.33424836662398e-05	1	1	0.000180388
13722	Glyma.20G018000	2	0	0	0	0	0	0	2	0	2	0	0	2	0	2	0	0	0	0	0	0	2	2	0	0	0	2	0	0	0	16	6.33424836662398e-05	1	1	0.000180388
13749	Glyma.20G027300	4	0	0	0	0	0	0	0	4	0	0	0	0	0	0	0	0	2	0	0	2	4	0	0	0	0	0	0	0	0	16	6.33424836662398e-05	1	1	0.000180388
13812	Glyma.20G048400	1	0	0	0	1	0	0	1	1	1	0	0	2	0	2	0	0	0	0	1	0	4	0	1	0	0	1	0	0	0	16	6.33424836662398e-05	1	1	0.000180388
13881	Glyma.20G066500	1	0	0	0	1	0	0	2	1	2	0	0	1	1	1	0	0	0	0	1	1	1	1	1	0	0	1	0	0	0	16	6.33424836662398e-05	1	1	0.000180388
13957	Glyma.20G087600	1	0	1	0	1	0	0	1	1	1	0	1	1	1	1	0	0	0	0	1	0	1	1	1	1	0	1	0	0	0	16	6.33424836662398e-05	1	1	0.000180388
13972	Glyma.20G101600	6	0	0	0	0	0	0	0	0	0	0	0	0	0	0	0	0	0	0	4	0	6	0	0	0	0	0	0	0	0	16	6.33424836662398e-05	1	1	0.000180388
14097	Glyma.20G138000	1	0	0	0	1	0	0	1	1	1	0	0	1	1	2	0	0	1	0	1	1	1	1	1	0	0	1	0	0	0	16	6.33424836662398e-05	1	1	0.000180388
14104	Glyma.20G139700	2	0	0	0	0	0	0	0	0	0	0	0	0	0	2	0	0	0	0	2	0	2	2	2	2	0	2	0	0	0	16	6.33424836662398e-05	1	1	0.000180388
14127	Glyma.20G152800	1	0	0	0	1	0	0	1	1	1	0	1	1	1	1	0	0	1	0	1	0	1	1	1	0	1	1	0	0	0	16	6.33424836662398e-05	1	1	0.000180388
14170	Glyma.20G175100	1	0	0	0	1	0	0	1	1	1	0	1	1	1	1	0	0	1	0	1	1	1	1	1	0	0	1	0	0	0	16	6.33424836662398e-05	1	1	0.000180388
14204	Glyma.20G183932	2	0	2	0	2	0	0	0	0	0	0	0	2	0	3	0	0	0	0	0	0	3	0	0	0	0	2	0	0	0	16	6.33424836662398e-05	1	1	0.000180388
14213	Glyma.20G186200	1	0	1	0	1	0	0	1	1	1	0	0	1	1	1	0	0	0	0	1	1	1	1	1	1	0	1	0	0	0	16	6.33424836662398e-05	1	1	0.000180388
14316	Glyma.U002300	4	0	0	0	1	0	0	1	2	1	0	0	0	0	3	0	0	0	0	2	0	0	0	2	0	0	0	0	0	0	16	6.33424836662398e-05	1	1	0.000180388
14341	Glyma.U045802	1	0	0	0	1	0	0	1	1	1	0	0	1	0	2	0	0	0	0	1	1	2	2	1	0	0	1	0	0	0	16	6.33424836662398e-05	1	1	0.000180388
14365	Glyma.01G009400	0	0	1	0	1	1	0	1	1	1	0	0	0	1	2	2	0	0	0	0	1	1	1	1	0	0	1	0	0	0	16	6.33424836662398e-05	1	1	0.000180388
14393	Glyma.02G206300	0	0	2	0	2	0	0	0	0	0	0	0	0	0	2	0	0	0	0	2	0	2	2	2	2	0	0	0	0	0	16	6.33424836662398e-05	1	1	0.000180388
14451	Glyma.04G030000	0	0	1	0	2	0	0	1	1	1	0	1	0	1	1	0	0	0	0	1	0	3	1	1	0	0	1	0	0	0	16	6.33424836662398e-05	1	1	0.000180388
14462	Glyma.04G042300	0	0	2	0	0	0	0	0	0	0	0	0	0	0	2	2	0	2	0	2	0	2	2	2	0	0	0	0	0	0	16	6.33424836662398e-05	1	1	0.000180388
14633	Glyma.12G176700	0	0	4	0	0	0	0	2	0	2	0	0	0	0	2	0	0	4	0	0	2	0	0	0	0	0	0	0	0	0	16	6.33424836662398e-05	1	1	0.000180388
14657	Glyma.13G180500	0	0	1	0	0	0	0	2	0	2	0	1	1	1	0	1	0	0	0	1	0	1	0	1	2	0	2	0	0	0	16	6.33424836662398e-05	1	1	0.000180388
14689	Glyma.14G215200	0	0	2	0	0	0	0	2	0	2	0	0	0	2	4	0	0	0	0	2	2	0	0	0	0	0	0	0	0	0	16	6.33424836662398e-05	1	1	0.000180388
14702	Glyma.15G035600	0	0	2	0	0	0	0	0	0	0	0	0	2	2	0	0	0	0	2	0	0	2	2	2	2	0	0	0	0	0	16	6.33424836662398e-05	1	1	0.000180388
14722	Glyma.16G043200	0	0	1	0	0	0	0	0	0	0	0	0	3	2	3	0	0	1	0	0	0	2	2	2	0	0	0	0	0	0	16	6.33424836662398e-05	1	1	0.000180388
14741	Glyma.17G142300	0	0	1	0	0	0	0	0	0	0	0	2	0	2	2	1	0	1	0	1	0	2	2	2	0	0	0	0	0	0	16	6.33424836662398e-05	1	1	0.000180388
14747	Glyma.17G146700	0	0	1	0	0	0	0	0	0	0	0	2	0	0	2	1	0	0	0	1	0	1	2	2	2	0	2	0	0	0	16	6.33424836662398e-05	1	1	0.000180388
14755	Glyma.17G177800	0	0	1	0	1	0	0	1	1	1	0	0	1	1	2	0	0	0	0	0	1	1	1	1	1	0	2	0	0	0	16	6.33424836662398e-05	1	1	0.000180388
14816	Glyma.02G054900	0	0	0	1	0	0	1	0	0	0	0	1	0	0	2	1	0	0	0	2	0	2	2	2	2	0	0	0	0	0	16	6.33424836662398e-05	1	1	0.000180388
14875	Glyma.18G042400	0	0	0	1	1	0	0	3	1	3	0	1	1	1	2	0	0	0	0	0	1	1	0	0	0	0	0	0	0	0	16	6.33424836662398e-05	1	1	0.000180388
14887	Glyma.01G001300	0	0	0	0	4	0	4	0	0	0	0	0	0	0	4	0	0	0	0	0	0	0	0	0	0	0	4	0	0	0	16	6.33424836662398e-05	1	1	0.000180388
14922	Glyma.01G074800	0	0	0	0	1	1	1	1	1	1	0	0	1	1	3	0	0	0	0	1	0	3	1	0	0	0	0	0	0	0	16	6.33424836662398e-05	1	1	0.000180388
14932	Glyma.01G168700	0	0	0	0	1	0	2	1	1	1	0	1	1	1	2	0	0	0	0	1	0	1	1	1	0	0	1	0	0	0	16	6.33424836662398e-05	1	1	0.000180388
14971	Glyma.02G032100	0	0	0	0	2	0	0	2	2	2	0	1	2	1	0	0	0	0	0	0	2	0	0	0	0	0	2	0	0	0	16	6.33424836662398e-05	1	1	0.000180388
14979	Glyma.02G033900	0	0	0	0	1	0	0	2	2	2	0	1	2	2	0	1	0	1	0	0	2	0	0	0	0	0	0	0	0	0	16	6.33424836662398e-05	1	1	0.000180388
15032	Glyma.02G208100	0	0	0	0	1	0	0	3	2	3	0	1	2	0	0	0	0	0	0	1	0	0	1	0	0	0	2	0	0	0	16	6.33424836662398e-05	1	1	0.000180388
15067	Glyma.02G267900	0	0	0	0	2	0	0	0	0	0	0	4	4	6	0	0	0	0	0	0	0	0	0	0	0	0	0	0	0	0	16	6.33424836662398e-05	1	1	0.000180388
15070	Glyma.02G274100	0	0	0	0	2	0	0	0	2	0	0	0	0	0	0	0	0	2	0	0	2	2	2	2	0	0	2	0	0	0	16	6.33424836662398e-05	1	1	0.000180388
15082	Glyma.03G023401	0	0	0	0	1	0	0	1	1	1	0	1	1	0	2	0	0	1	0	1	1	1	2	1	0	0	1	0	0	0	16	6.33424836662398e-05	1	1	0.000180388
15223	Glyma.04G193400	0	0	0	0	4	0	0	4	0	4	0	0	0	0	4	0	0	0	0	0	0	0	0	0	0	0	0	0	0	0	16	6.33424836662398e-05	1	1	0.000180388
15296	Glyma.05G142000	0	0	0	0	2	0	0	2	2	2	0	0	2	0	0	0	0	0	0	2	0	2	0	0	0	0	2	0	0	0	16	6.33424836662398e-05	1	1	0.000180388
15407	Glyma.06G152900	0	0	0	0	2	0	0	2	0	2	0	0	0	2	2	2	0	0	0	0	0	2	2	0	0	0	0	0	0	0	16	6.33424836662398e-05	1	1	0.000180388
15422	Glyma.06G196000	0	0	0	0	2	0	0	2	0	2	0	0	2	0	0	0	0	2	0	0	0	2	2	2	0	0	0	0	0	0	16	6.33424836662398e-05	1	1	0.000180388
15471	Glyma.06G243300	0	0	0	0	2	0	0	4	2	4	0	0	4	0	0	0	0	0	0	0	0	0	0	0	0	0	0	0	0	0	16	6.33424836662398e-05	1	1	0.000180388
15546	Glyma.07G060400	0	0	0	0	4	0	0	0	0	0	0	0	0	0	2	0	1	1	0	0	0	2	2	2	2	0	0	0	0	0	16	6.33424836662398e-05	1	1	0.000180388
15834	Glyma.09G086600	0	0	0	0	2	0	0	2	4	2	0	0	2	0	0	0	0	0	0	0	0	2	0	0	0	0	2	0	0	0	16	6.33424836662398e-05	1	1	0.000180388
15836	Glyma.09G089600	0	0	0	0	1	0	0	2	2	2	0	0	0	0	0	0	0	1	0	0	1	2	1	1	1	0	2	0	0	0	16	6.33424836662398e-05	1	1	0.000180388
15846	Glyma.09G092600	0	0	0	0	2	0	0	2	2	2	0	0	0	0	0	0	0	0	0	1	0	3	2	2	0	0	0	0	0	0	16	6.33424836662398e-05	1	1	0.000180388
15873	Glyma.09G149500	0	0	0	0	2	0	0	2	2	2	0	2	0	0	0	0	0	0	0	0	2	2	0	0	0	0	2	0	0	0	16	6.33424836662398e-05	1	1	0.000180388
15888	Glyma.09G158900	0	0	0	0	2	0	0	0	4	0	0	0	0	0	6	0	0	0	0	0	2	0	0	0	0	0	2	0	0	0	16	6.33424836662398e-05	1	1	0.000180388
15897	Glyma.09G168500	0	0	0	0	2	0	0	0	2	0	0	0	2	0	2	0	0	0	0	0	0	2	2	0	2	0	2	0	0	0	16	6.33424836662398e-05	1	1	0.000180388
15921	Glyma.09G247300	0	0	0	0	2	0	0	2	2	2	0	2	0	0	0	0	0	0	0	1	1	1	1	2	0	0	0	0	0	0	16	6.33424836662398e-05	1	1	0.000180388
15948	Glyma.10G135733	0	0	0	0	2	0	0	2	2	2	0	1	0	0	2	0	0	0	0	1	0	2	0	0	1	0	1	0	0	0	16	6.33424836662398e-05	1	1	0.000180388
15990	Glyma.10G254400	0	0	0	0	2	0	0	2	2	2	0	0	2	0	0	0	0	0	0	0	2	2	0	2	0	0	0	0	0	0	16	6.33424836662398e-05	1	1	0.000180388
16054	Glyma.11G070200	0	0	0	0	2	0	0	0	0	0	0	2	0	2	2	2	0	0	0	2	2	2	0	0	0	0	0	0	0	0	16	6.33424836662398e-05	1	1	0.000180388
16160	Glyma.12G048200	0	0	0	0	3	0	0	1	1	1	0	1	2	0	3	0	0	0	0	0	0	1	0	0	1	0	2	0	0	0	16	6.33424836662398e-05	1	1	0.000180388
16198	Glyma.12G087300	0	0	0	0	4	0	0	0	4	0	0	0	4	0	0	0	0	0	0	0	0	0	0	0	0	0	4	0	0	0	16	6.33424836662398e-05	1	1	0.000180388
16243	Glyma.12G211800	0	0	0	0	2	0	0	2	2	2	0	0	0	2	4	0	0	0	0	0	0	0	0	0	0	0	2	0	0	0	16	6.33424836662398e-05	1	1	0.000180388
16289	Glyma.13G257000	0	0	0	0	8	0	0	0	0	0	0	0	8	0	0	0	0	0	0	0	0	0	0	0	0	0	0	0	0	0	16	6.33424836662398e-05	1	1	0.000180388
16376	Glyma.15G049000	0	0	0	0	2	0	0	2	2	2	0	0	2	0	0	0	0	0	0	0	0	0	2	0	2	0	2	0	0	0	16	6.33424836662398e-05	1	1	0.000180388
16392	Glyma.15G100600	0	0	0	0	2	0	0	0	0	0	0	0	0	0	2	0	0	0	0	2	2	2	2	2	2	0	0	0	0	0	16	6.33424836662398e-05	1	1	0.000180388
16408	Glyma.15G154500	0	0	0	0	1	0	0	2	2	2	0	1	0	0	3	0	0	0	0	0	1	0	2	2	0	0	0	0	0	0	16	6.33424836662398e-05	1	1	0.000180388
16443	Glyma.15G197500	0	0	0	0	2	0	0	0	2	0	0	2	2	2	2	0	0	0	0	0	2	2	0	0	0	0	0	0	0	0	16	6.33424836662398e-05	1	1	0.000180388
16532	Glyma.16G070200	0	0	0	0	2	0	0	2	0	2	0	2	0	2	0	2	0	0	0	0	0	0	2	2	0	0	0	0	0	0	16	6.33424836662398e-05	1	1	0.000180388
16539	Glyma.16G108500	0	0	0	0	4	0	0	0	0	0	0	0	4	2	4	0	0	0	0	0	0	2	0	0	0	0	0	0	0	0	16	6.33424836662398e-05	1	1	0.000180388
16541	Glyma.16G109600	0	0	0	0	1	0	0	0	0	0	0	0	6	1	5	0	0	0	0	0	0	2	0	0	1	0	0	0	0	0	16	6.33424836662398e-05	1	1	0.000180388
16549	Glyma.16G111100	0	0	0	0	4	0	0	0	0	0	0	0	4	2	4	0	0	0	0	0	0	2	0	0	0	0	0	0	0	0	16	6.33424836662398e-05	1	1	0.000180388
16573	Glyma.16G161500	0	0	0	0	8	0	0	0	0	0	0	4	4	0	0	0	0	0	0	0	0	0	0	0	0	0	0	0	0	0	16	6.33424836662398e-05	1	1	0.000180388
16659	Glyma.17G232290	0	0	0	0	1	0	0	1	1	1	0	1	2	1	2	0	0	1	0	0	1	1	1	1	0	0	1	0	0	0	16	6.33424836662398e-05	1	1	0.000180388
16675	Glyma.17G260000	0	0	0	0	2	0	0	2	2	2	0	0	0	0	0	0	0	0	0	0	2	0	2	2	0	0	2	0	0	0	16	6.33424836662398e-05	1	1	0.000180388
16692	Glyma.18G045100	0	0	0	0	1	0	0	2	2	2	0	0	2	0	1	0	0	0	0	1	2	2	0	1	0	0	0	0	0	0	16	6.33424836662398e-05	1	1	0.000180388
16710	Glyma.18G065367	0	0	0	0	2	0	0	2	2	2	0	0	2	1	0	0	0	0	0	0	0	3	0	0	0	0	2	0	0	0	16	6.33424836662398e-05	1	1	0.000180388
16802	Glyma.18G158600	0	0	0	0	2	0	0	0	2	0	0	0	2	0	2	0	0	0	0	1	0	2	2	1	0	0	2	0	0	0	16	6.33424836662398e-05	1	1	0.000180388
16805	Glyma.18G183700	0	0	0	0	1	0	0	1	1	1	0	1	2	1	0	1	0	0	0	1	1	1	1	1	1	0	1	0	0	0	16	6.33424836662398e-05	1	1	0.000180388
16842	Glyma.18G271100	0	0	0	0	2	0	0	3	0	3	0	0	3	0	3	0	0	0	0	0	0	0	1	1	0	0	0	0	0	0	16	6.33424836662398e-05	1	1	0.000180388
16955	Glyma.20G206900	0	0	0	0	6	0	0	0	0	0	0	0	0	0	0	0	0	0	0	0	2	2	0	0	0	0	6	0	0	0	16	6.33424836662398e-05	1	1	0.000180388
17109	Glyma.01G078150	0	0	0	0	0	0	1	2	1	2	0	0	3	0	3	0	0	0	0	2	0	1	0	1	0	0	0	0	0	0	16	6.33424836662398e-05	1	1	0.000180388
17120	Glyma.01G109100	0	0	0	0	0	0	2	0	0	0	0	0	4	0	4	0	0	0	0	0	0	4	0	0	0	0	2	0	0	0	16	6.33424836662398e-05	1	1	0.000180388
17384	Glyma.03G014300	0	0	0	0	0	0	0	4	0	4	0	4	0	0	0	0	0	0	0	0	0	4	0	0	0	0	0	0	0	0	16	6.33424836662398e-05	1	1	0.000180388
17393	Glyma.03G026900	0	0	0	0	0	0	0	2	0	2	0	2	0	0	0	0	0	0	0	2	0	2	2	2	2	0	0	0	0	0	16	6.33424836662398e-05	1	1	0.000180388
17486	Glyma.04G163000	0	0	0	0	0	0	0	2	2	2	0	0	0	2	4	0	0	0	0	0	0	2	2	0	0	0	0	0	0	0	16	6.33424836662398e-05	1	1	0.000180388
17544	Glyma.05G229400	0	0	0	0	0	0	0	2	2	2	0	0	2	2	2	0	0	0	0	0	0	0	2	0	2	0	0	0	0	0	16	6.33424836662398e-05	1	1	0.000180388
17578	Glyma.06G088200	0	0	0	0	0	0	0	2	0	2	0	0	2	0	2	2	0	0	0	0	4	2	0	0	0	0	0	0	0	0	16	6.33424836662398e-05	1	1	0.000180388
17651	Glyma.06G263300	0	0	0	0	0	0	0	2	2	2	0	0	2	0	4	0	0	0	0	0	0	0	2	0	2	0	0	0	0	0	16	6.33424836662398e-05	1	1	0.000180388
17712	Glyma.07G070800	0	0	0	0	0	0	0	2	0	2	0	0	0	0	2	0	0	2	0	2	0	2	2	2	0	0	0	0	0	0	16	6.33424836662398e-05	1	1	0.000180388
17838	Glyma.08G157900	0	0	0	0	0	0	0	8	0	8	0	0	0	0	0	0	0	0	0	0	0	0	0	0	0	0	0	0	0	0	16	6.33424836662398e-05	1	1	0.000180388
17896	Glyma.08G235100	0	0	0	0	0	0	0	2	3	2	0	0	0	2	2	0	0	0	0	0	1	0	2	2	0	0	0	0	0	0	16	6.33424836662398e-05	1	1	0.000180388
18030	Glyma.09G163500	0	0	0	0	0	0	0	4	0	4	0	0	0	0	4	0	0	0	0	4	0	0	0	0	0	0	0	0	0	0	16	6.33424836662398e-05	1	1	0.000180388
18127	Glyma.10G162350	0	0	0	0	0	0	0	2	1	2	0	0	0	0	0	2	0	0	0	0	1	2	2	2	0	0	2	0	0	0	16	6.33424836662398e-05	1	1	0.000180388
18132	Glyma.10G178600	0	0	0	0	0	0	0	4	4	4	0	0	0	0	0	0	0	2	0	0	2	0	0	0	0	0	0	0	0	0	16	6.33424836662398e-05	1	1	0.000180388
18136	Glyma.10G185000	0	0	0	0	0	0	0	6	0	6	0	0	0	0	0	0	0	2	0	0	2	0	0	0	0	0	0	0	0	0	16	6.33424836662398e-05	1	1	0.000180388
18195	Glyma.11G166128	0	0	0	0	0	0	0	4	2	4	0	0	2	0	0	0	0	0	0	0	0	0	2	0	0	0	2	0	0	0	16	6.33424836662398e-05	1	1	0.000180388
18213	Glyma.11G253000	0	0	0	0	0	0	0	2	2	2	0	0	0	2	1	0	0	1	0	2	1	1	1	0	0	0	1	0	0	0	16	6.33424836662398e-05	1	1	0.000180388
18244	Glyma.12G146350	0	0	0	0	0	0	0	2	3	2	0	0	0	0	3	0	0	0	0	1	0	2	3	0	0	0	0	0	0	0	16	6.33424836662398e-05	1	1	0.000180388
18257	Glyma.12G188200	0	0	0	0	0	0	0	2	2	2	0	0	0	0	2	0	0	0	0	0	2	2	2	2	0	0	0	0	0	0	16	6.33424836662398e-05	1	1	0.000180388
18282	Glyma.12G220101	0	0	0	0	0	0	0	2	0	2	0	2	0	0	2	0	0	2	0	2	0	2	0	0	2	0	0	0	0	0	16	6.33424836662398e-05	1	1	0.000180388
18289	Glyma.12G231400	0	0	0	0	0	0	0	2	0	2	0	1	0	0	3	0	0	0	0	0	2	2	0	2	2	0	0	0	0	0	16	6.33424836662398e-05	1	1	0.000180388
18346	Glyma.13G046600	0	0	0	0	0	0	0	2	0	2	0	0	2	0	2	2	0	0	0	0	0	4	2	0	0	0	0	0	0	0	16	6.33424836662398e-05	1	1	0.000180388
18353	Glyma.13G070300	0	0	0	0	0	0	0	2	0	2	0	2	0	2	1	0	0	0	0	0	0	2	0	3	0	0	2	0	0	0	16	6.33424836662398e-05	1	1	0.000180388
18608	Glyma.14G103600	0	0	0	0	0	0	0	2	2	2	0	0	2	2	2	0	0	0	0	2	2	0	0	0	0	0	0	0	0	0	16	6.33424836662398e-05	1	1	0.000180388
18616	Glyma.14G105400	0	0	0	0	0	0	0	2	2	2	0	0	2	0	4	0	0	0	0	0	2	2	0	0	0	0	0	0	0	0	16	6.33424836662398e-05	1	1	0.000180388
18644	Glyma.14G136600	0	0	0	0	0	0	0	6	0	6	0	0	2	0	2	0	0	0	0	0	0	0	0	0	0	0	0	0	0	0	16	6.33424836662398e-05	1	1	0.000180388
18656	Glyma.14G163400	0	0	0	0	0	0	0	2	4	2	0	2	0	1	3	0	0	0	0	0	2	0	0	0	0	0	0	0	0	0	16	6.33424836662398e-05	1	1	0.000180388
18674	Glyma.14G199500	0	0	0	0	0	0	0	4	0	4	0	0	0	0	4	0	0	0	0	0	4	0	0	0	0	0	0	0	0	0	16	6.33424836662398e-05	1	1	0.000180388
18682	Glyma.14G214500	0	0	0	0	0	0	0	2	0	2	0	0	0	2	2	0	1	1	0	1	2	0	0	0	3	0	0	0	0	0	16	6.33424836662398e-05	1	1	0.000180388
18762	Glyma.16G090900	0	0	0	0	0	0	0	8	0	8	0	0	0	0	0	0	0	0	0	0	0	0	0	0	0	0	0	0	0	0	16	6.33424836662398e-05	1	1	0.000180388
18776	Glyma.16G179200	0	0	0	0	0	0	0	1	0	1	0	2	1	1	0	2	0	0	0	2	0	1	2	2	0	0	1	0	0	0	16	6.33424836662398e-05	1	1	0.000180388
18779	Glyma.16G181900	0	0	0	0	0	0	0	2	0	2	0	2	2	2	1	0	0	0	0	0	0	1	1	0	1	0	2	0	0	0	16	6.33424836662398e-05	1	1	0.000180388
18785	Glyma.16G187700	0	0	0	0	0	0	0	2	0	2	0	0	4	0	4	0	0	0	0	0	0	0	0	0	4	0	0	0	0	0	16	6.33424836662398e-05	1	1	0.000180388
18837	Glyma.17G081850	0	0	0	0	0	0	0	2	2	2	0	2	2	2	0	2	0	0	0	0	0	0	0	2	0	0	0	0	0	0	16	6.33424836662398e-05	1	1	0.000180388
18902	Glyma.17G249400	0	0	0	0	0	0	0	2	0	2	0	0	2	2	2	0	0	0	0	0	0	0	2	2	0	0	2	0	0	0	16	6.33424836662398e-05	1	1	0.000180388
18920	Glyma.18G050700	0	0	0	0	0	0	0	4	4	4	0	0	0	0	0	0	0	0	0	0	4	0	0	0	0	0	0	0	0	0	16	6.33424836662398e-05	1	1	0.000180388
18923	Glyma.18G055800	0	0	0	0	0	0	0	2	2	2	0	2	0	0	0	0	0	0	0	0	2	0	2	0	2	0	2	0	0	0	16	6.33424836662398e-05	1	1	0.000180388
19019	Glyma.19G007550	0	0	0	0	0	0	0	2	0	2	0	1	0	0	2	1	0	0	0	1	1	2	2	1	0	0	1	0	0	0	16	6.33424836662398e-05	1	1	0.000180388
19053	Glyma.19G128200	0	0	0	0	0	0	0	2	2	2	0	0	0	0	2	0	0	0	0	0	0	2	2	2	0	0	2	0	0	0	16	6.33424836662398e-05	1	1	0.000180388
19125	Glyma.20G242800	0	0	0	0	0	0	0	4	0	4	0	0	4	0	0	0	0	0	0	0	0	0	0	0	0	0	4	0	0	0	16	6.33424836662398e-05	1	1	0.000180388
19182	Glyma.02G247000	0	0	0	0	0	0	0	0	2	0	0	0	2	2	0	0	0	0	0	0	2	2	2	2	0	0	2	0	0	0	16	6.33424836662398e-05	1	1	0.000180388
19295	Glyma.04G137400	0	0	0	0	0	0	0	0	4	0	0	1	0	2	3	0	0	0	0	2	1	3	0	0	0	0	0	0	0	0	16	6.33424836662398e-05	1	1	0.000180388
19313	Glyma.04G154300	0	0	0	0	0	0	0	0	6	0	0	2	0	0	0	0	0	0	0	2	0	6	0	0	0	0	0	0	0	0	16	6.33424836662398e-05	1	1	0.000180388
19408	Glyma.06G308600	0	0	0	0	0	0	0	0	4	0	0	4	0	0	0	4	0	0	0	0	4	0	0	0	0	0	0	0	0	0	16	6.33424836662398e-05	1	1	0.000180388
19412	Glyma.06G313700	0	0	0	0	0	0	0	0	6	0	0	0	0	0	0	0	0	0	0	6	6	0	6	6	0	0	0	0	6	6	30	6.33424836662398e-05	1	1	0.000180388
19478	Glyma.08G258700	0	0	0	0	0	0	0	0	4	0	0	4	4	0	0	0	0	0	0	0	0	4	0	0	0	0	0	0	0	0	16	6.33424836662398e-05	1	1	0.000180388
19526	Glyma.09G284800	0	0	0	0	0	0	0	0	4	0	0	0	0	0	4	0	0	0	0	0	4	0	0	0	0	0	4	0	0	0	16	6.33424836662398e-05	1	1	0.000180388
19736	Glyma.13G323100	0	0	0	0	0	0	0	0	8	0	0	0	0	0	0	0	0	0	0	0	8	0	0	0	0	0	0	0	0	0	16	6.33424836662398e-05	1	1	0.000180388
19827	Glyma.14G161800	0	0	0	0	0	0	0	0	7	0	0	0	0	3	6	0	0	0	0	0	0	0	0	0	0	0	0	0	0	0	16	6.33424836662398e-05	1	1	0.000180388
19854	Glyma.15G126900	0	0	0	0	0	0	0	0	2	0	0	0	0	2	0	2	0	0	0	0	2	2	0	2	2	0	2	0	0	0	16	6.33424836662398e-05	1	1	0.000180388
19943	Glyma.16G189400	0	0	0	0	0	0	0	0	4	0	0	4	0	0	0	0	0	0	0	0	4	0	0	0	4	0	0	0	0	0	16	6.33424836662398e-05	1	1	0.000180388
19962	Glyma.17G150800	0	0	0	0	0	0	0	0	2	0	0	0	0	0	2	0	0	0	0	2	0	2	2	2	2	0	2	0	0	0	16	6.33424836662398e-05	1	1	0.000180388
20019	Glyma.18G093500	0	0	0	0	0	0	0	0	8	0	0	2	0	0	0	0	0	0	0	0	0	0	4	2	0	0	0	0	0	0	16	6.33424836662398e-05	1	1	0.000180388
20029	Glyma.18G096400	0	0	0	0	0	0	0	0	2	0	0	0	0	2	2	0	0	2	0	0	2	0	2	2	0	0	2	0	0	0	16	6.33424836662398e-05	1	1	0.000180388
20044	Glyma.18G238800	0	0	0	0	0	0	0	0	3	0	0	0	0	0	3	1	0	0	0	0	1	0	3	3	2	0	0	0	0	0	16	6.33424836662398e-05	1	1	0.000180388
20059	Glyma.18G283166	0	0	0	0	0	0	0	0	5	0	0	0	0	0	0	0	0	1	0	0	4	0	6	0	0	0	0	0	0	0	16	6.33424836662398e-05	1	1	0.000180388
20135	Glyma.19G121000	0	0	0	0	0	0	0	0	4	0	0	0	0	0	4	0	0	0	0	0	2	0	4	2	0	0	0	0	0	0	16	6.33424836662398e-05	1	1	0.000180388
20162	Glyma.19G231250	0	0	0	0	0	0	0	0	2	0	0	0	2	0	2	0	0	0	0	2	2	0	2	2	0	0	2	0	0	0	16	6.33424836662398e-05	1	1	0.000180388
20177	Glyma.20G136900	0	0	0	0	0	0	0	0	2	0	0	0	2	0	2	0	0	0	0	2	2	0	2	2	0	0	2	0	0	0	16	6.33424836662398e-05	1	1	0.000180388
20503	Glyma.16G214641	0	0	0	0	0	0	0	0	0	0	0	2	0	0	6	0	0	0	0	0	0	2	6	0	0	0	0	0	0	0	16	6.33424836662398e-05	1	1	0.000180388
20509	Glyma.17G142060	0	0	0	0	0	0	0	0	0	0	0	2	0	2	2	0	0	0	0	2	0	2	2	2	2	0	0	0	0	0	16	6.33424836662398e-05	1	1	0.000180388
20557	Glyma.17G201700	0	0	0	0	0	0	0	0	0	0	0	4	0	0	8	0	0	0	0	0	0	0	0	0	0	0	4	0	0	0	16	6.33424836662398e-05	1	1	0.000180388
20621	Glyma.20G234900	0	0	0	0	0	0	0	0	0	0	0	4	4	0	0	0	0	0	0	0	4	0	0	0	0	0	4	0	0	0	16	6.33424836662398e-05	1	1	0.000180388
20710	Glyma.04G045000	0	0	0	0	0	0	0	0	0	0	0	0	2	0	2	0	0	2	0	2	0	2	2	2	2	0	0	0	0	0	16	6.33424836662398e-05	1	1	0.000180388
20716	Glyma.04G047400	0	0	0	0	0	0	0	0	0	0	0	0	2	0	2	2	0	1	0	2	0	2	2	2	1	0	0	0	0	0	16	6.33424836662398e-05	1	1	0.000180388
21040	Glyma.15G034800	0	0	0	0	0	0	0	0	0	0	0	0	4	0	0	0	0	0	0	0	4	4	0	4	0	0	0	0	0	0	16	6.33424836662398e-05	1	1	0.000180388
21098	Glyma.16G129300	0	0	0	0	0	0	0	0	0	0	0	0	2	0	2	0	0	0	0	0	0	4	6	2	0	0	0	0	0	0	16	6.33424836662398e-05	1	1	0.000180388
21128	Glyma.17G104000	0	0	0	0	0	0	0	0	0	0	0	0	2	0	2	0	0	2	0	2	0	2	2	2	0	0	2	0	0	0	16	6.33424836662398e-05	1	1	0.000180388
21155	Glyma.17G196800	0	0	0	0	0	0	0	0	0	0	0	0	2	0	8	0	0	0	0	0	0	0	0	0	0	0	6	0	0	0	16	6.33424836662398e-05	1	1	0.000180388
21204	Glyma.18G224800	0	0	0	0	0	0	0	0	0	0	0	0	2	2	2	2	0	0	0	0	2	0	2	2	0	0	2	0	0	0	16	6.33424836662398e-05	1	1	0.000180388
21249	Glyma.19G240300	0	0	0	0	0	0	0	0	0	0	0	0	4	4	0	0	0	0	0	4	0	0	0	0	4	0	0	0	0	0	16	6.33424836662398e-05	1	1	0.000180388
21538	Glyma.16G156200	0	0	0	0	0	0	0	0	0	0	0	0	0	2	0	0	0	0	0	0	2	6	2	2	2	0	0	0	0	0	16	6.33424836662398e-05	1	1	0.000180388
21563	Glyma.17G242500	0	0	0	0	0	0	0	0	0	0	0	0	0	4	4	2	0	0	0	2	0	0	0	4	0	0	0	0	0	0	16	6.33424836662398e-05	1	1	0.000180388
21997	Glyma.06G039600	0	0	0	0	0	0	0	0	0	0	0	0	0	0	4	0	0	0	0	0	0	4	4	4	0	0	0	0	0	0	16	6.33424836662398e-05	1	1	0.000180388
22380	Glyma.09G173200	0	0	0	0	0	0	0	0	0	0	0	0	0	0	16	0	0	0	0	0	0	0	0	0	0	0	0	0	0	0	16	6.33424836662398e-05	1	1	0.000180388
22643	Glyma.12G110400	0	0	0	0	0	0	0	0	0	0	0	0	0	0	4	0	0	2	0	2	0	2	2	2	0	0	2	0	0	0	16	6.33424836662398e-05	1	1	0.000180388
22867	Glyma.14G155200	0	0	0	0	0	0	0	0	0	0	0	0	0	0	4	0	0	0	0	0	0	0	4	4	4	0	0	0	0	0	16	6.33424836662398e-05	1	1	0.000180388
23244	Glyma.17G197900	0	0	0	0	0	0	0	0	0	0	0	0	0	0	8	0	0	0	0	0	0	0	0	0	0	0	8	0	0	0	16	6.33424836662398e-05	1	1	0.000180388
23260	Glyma.17G217100	0	0	0	0	0	0	0	0	0	0	0	0	0	0	1	1	0	0	0	1	0	0	4	4	4	0	1	0	0	0	16	6.33424836662398e-05	1	1	0.000180388
23342	Glyma.18G262500	0	0	0	0	0	0	0	0	0	0	0	0	0	0	4	0	0	4	0	0	0	4	0	4	0	0	0	0	0	0	16	6.33424836662398e-05	1	1	0.000180388
23823	Glyma.19G164300	0	0	0	0	0	0	0	0	0	0	0	0	0	0	0	2	0	4	0	0	0	0	2	4	4	0	0	0	0	0	16	6.33424836662398e-05	1	1	0.000180388
24580	Glyma.16G059500	0	0	0	0	0	0	0	0	0	0	0	0	0	0	0	0	0	0	0	4	0	0	4	4	4	0	0	0	0	0	16	6.33424836662398e-05	1	1	0.000180388
24587	Glyma.16G128500	0	0	0	0	0	0	0	0	0	0	0	0	0	0	0	0	0	0	0	4	0	4	4	4	0	0	0	0	0	0	16	6.33424836662398e-05	1	1	0.000180388
25556	Glyma.05G181200	0	0	0	0	0	0	0	0	0	0	0	0	0	0	0	0	0	0	0	0	0	0	10	6	0	0	0	0	0	0	16	6.33424836662398e-05	1	1	0.000180388
3513	Glyma.05G216200	1	0	0	0	0	0	0	2	2	2	0	0	2	2	0	0	0	0	0	2	2	1	2	1	2	0	0	0	2	2	21	7.43949840484048e-05	1	1	0.00021168
8333	Glyma.12G232900	2	0	0	1	0	0	0	1	1	1	0	0	0	1	4	1	0	0	1	4	2	0	1	1	0	0	0	0	2	2	21	7.43949840484048e-05	1	1	0.00021168
8845	Glyma.13G174200	2	0	0	0	0	0	0	2	2	2	0	2	0	0	2	0	0	0	0	0	2	2	2	0	1	0	2	0	2	2	21	7.43949840484048e-05	1	1	0.00021168
9966	Glyma.15G089700	2	0	0	0	0	0	0	0	2	0	0	0	2	2	2	0	0	0	1	2	2	2	2	2	0	0	0	0	2	2	21	7.43949840484048e-05	1	1	0.00021168
10685	Glyma.16G037700	1	0	0	0	1	0	0	1	1	1	0	1	1	1	2	1	0	1	0	2	1	1	2	2	0	0	1	1	1	2	21	7.43949840484048e-05	1	1	0.00021168
13079	Glyma.19G050000	2	0	0	0	0	0	0	1	2	1	0	0	2	2	2	0	0	0	0	2	1	2	2	2	0	0	0	0	2	2	21	7.43949840484048e-05	1	1	0.00021168
14015	Glyma.20G111850	2	0	0	0	1	0	0	1	1	1	0	0	1	1	2	0	0	1	0	1	0	2	2	2	2	0	1	0	2	2	21	7.43949840484048e-05	1	1	0.00021168
14769	Glyma.18G020400	0	0	3	0	0	0	0	0	2	0	0	0	0	0	0	2	0	3	0	3	0	1	4	0	3	0	0	0	2	2	21	7.43949840484048e-05	1	1	0.00021168
9224	Glyma.13G319500	1	0	0	0	1	0	0	1	3	1	0	2	2	1	2	0	0	0	0	3	1	2	1	1	1	0	0	0	3	3	23	8.76994237559023e-05	1	1	0.000249454
9355	Glyma.14G044900	2	0	1	0	0	0	0	3	0	3	0	0	3	3	2	0	0	2	0	0	0	2	0	2	0	0	0	0	3	3	23	8.76994237559023e-05	1	1	0.000249454
14945	Glyma.01G174300	0	0	0	0	1	0	1	3	4	3	0	0	3	3	1	0	0	0	0	0	0	1	1	1	1	0	0	0	3	3	23	8.76994237559023e-05	1	1	0.000249454
260	Glyma.01G091000	1	0	0	0	1	1	1	1	1	1	0	1	1	1	1	0	0	0	0	1	1	1	1	1	1	0	1	0	1	1	18	9.61658826888349e-05	1	1	0.000271532
309	Glyma.01G099500	1	0	0	0	1	1	1	1	1	1	0	0	1	1	2	1	0	0	0	0	1	1	1	1	1	0	1	0	1	1	18	9.61658826888349e-05	1	1	0.000271532
438	Glyma.01G125200	1	0	0	0	0	0	3	1	1	1	0	0	1	0	1	0	0	1	0	3	2	3	0	0	0	0	0	0	1	1	18	9.61658826888349e-05	1	1	0.000271532
495	Glyma.01G139100	1	0	1	0	1	0	2	1	1	1	0	0	0	1	1	0	0	0	0	2	1	1	1	1	1	0	1	0	1	1	18	9.61658826888349e-05	1	1	0.000271532
699	Glyma.01G225000	1	0	0	0	1	0	1	2	1	2	0	0	1	1	2	0	0	0	0	0	0	1	2	2	0	0	1	0	1	1	18	9.61658826888349e-05	1	1	0.000271532
708	Glyma.01G228100	1	0	0	0	1	0	1	1	1	1	0	1	1	0	1	0	0	1	1	1	1	1	1	1	1	0	1	0	1	1	18	9.61658826888349e-05	1	1	0.000271532
796	Glyma.02G020800	1	0	1	0	1	0	1	1	1	1	0	1	1	1	1	1	0	0	0	0	1	1	1	1	1	0	1	0	1	1	18	9.61658826888349e-05	1	1	0.000271532
1247	Glyma.02G173000	2	0	0	0	1	0	1	1	1	1	0	0	1	1	1	0	0	0	0	1	1	2	1	1	1	0	1	0	1	1	18	9.61658826888349e-05	1	1	0.000271532
1357	Glyma.02G197000	1	0	0	0	1	0	0	2	2	2	0	1	1	1	1	0	0	0	0	1	1	1	1	1	0	0	1	0	1	1	18	9.61658826888349e-05	1	1	0.000271532
1417	Glyma.02G221200	1	0	0	0	1	0	0	1	1	1	0	1	1	1	1	1	0	1	0	1	1	1	1	1	1	0	1	0	1	1	18	9.61658826888349e-05	1	1	0.000271532
1651	Glyma.03G011800	1	0	0	0	1	0	0	1	1	1	0	0	1	1	3	0	0	0	0	1	1	1	2	2	0	0	1	0	1	1	18	9.61658826888349e-05	1	1	0.000271532
1675	Glyma.03G017350	1	0	1	0	1	0	0	1	1	1	0	1	1	1	1	0	0	1	0	1	1	1	1	1	1	0	1	0	1	1	18	9.61658826888349e-05	1	1	0.000271532
1682	Glyma.03G019100	1	0	1	0	1	0	0	1	1	1	0	1	1	1	1	0	0	1	0	1	1	1	1	1	1	0	1	0	1	1	18	9.61658826888349e-05	1	1	0.000271532
1770	Glyma.03G038100	1	0	0	0	1	0	0	1	2	1	0	0	1	2	2	0	0	0	0	1	2	1	1	1	1	0	0	0	1	1	18	9.61658826888349e-05	1	1	0.000271532
1803	Glyma.03G043900	3	0	0	0	1	0	0	2	0	2	0	2	0	1	2	0	0	0	0	0	0	2	0	1	1	0	1	0	1	1	18	9.61658826888349e-05	1	1	0.000271532
2789	Glyma.04G167200	1	0	1	0	1	0	0	1	1	1	0	0	1	1	1	1	0	1	0	1	1	1	1	1	1	0	1	0	1	1	18	9.61658826888349e-05	1	1	0.000271532
3321	Glyma.05G137400	2	0	0	0	0	0	0	2	2	2	0	1	0	0	1	1	0	0	0	2	0	2	1	2	0	0	0	0	1	1	18	9.61658826888349e-05	1	1	0.000271532
3350	Glyma.05G150400	1	0	0	0	1	0	0	1	1	1	0	1	1	0	2	1	0	2	0	1	1	1	1	1	0	0	1	0	1	1	18	9.61658826888349e-05	1	1	0.000271532
3581	Glyma.05G233700	2	0	0	0	1	0	0	1	2	1	0	0	2	1	2	0	0	0	0	1	1	2	1	1	0	0	0	1	0	1	18	9.61658826888349e-05	1	1	0.000271532
3625	Glyma.06G027600	1	0	1	0	1	0	0	1	1	1	0	0	1	1	1	1	0	1	0	0	1	3	1	1	0	0	1	0	1	1	18	9.61658826888349e-05	1	1	0.000271532
3890	Glyma.06G189700	1	0	1	0	1	0	0	1	1	1	0	1	1	1	1	1	0	1	0	1	1	1	1	1	0	0	1	0	1	1	18	9.61658826888349e-05	1	1	0.000271532
4012	Glyma.06G215900	1	1	0	0	0	0	0	1	1	1	0	1	3	1	1	1	0	0	0	1	1	0	1	1	1	0	1	0	1	1	18	9.61658826888349e-05	1	1	0.000271532
4102	Glyma.06G235100	1	0	0	0	2	0	0	1	2	1	0	0	1	1	2	0	0	1	0	0	1	1	1	1	1	0	1	0	1	1	18	9.61658826888349e-05	1	1	0.000271532
4286	Glyma.06G284700	1	0	1	0	1	0	0	1	1	1	0	1	0	1	1	1	0	1	1	1	1	1	1	1	0	0	1	0	1	1	18	9.61658826888349e-05	1	1	0.000271532
4416	Glyma.06G319000	1	0	0	0	0	0	0	2	1	2	0	1	1	1	1	0	0	1	0	1	1	2	1	1	0	0	1	0	1	1	18	9.61658826888349e-05	1	1	0.000271532
4462	Glyma.07G014900	2	0	0	0	0	0	0	2	0	2	0	1	2	2	0	0	0	0	0	3	0	0	0	2	0	0	2	0	1	1	18	9.61658826888349e-05	1	1	0.000271532
4617	Glyma.07G091450	1	0	1	0	0	0	0	1	3	1	0	1	1	1	1	0	0	1	0	1	1	1	1	1	0	0	1	0	1	1	18	9.61658826888349e-05	1	1	0.000271532
4919	Glyma.07G183100	1	0	0	0	1	0	0	2	1	2	0	0	2	1	1	0	0	1	0	0	0	3	1	1	0	0	1	0	1	1	18	9.61658826888349e-05	1	1	0.000271532
5079	Glyma.07G264200	1	0	1	0	0	0	0	1	1	1	0	1	1	1	1	1	0	1	0	1	1	1	1	1	1	0	1	0	1	1	18	9.61658826888349e-05	1	1	0.000271532
5376	Glyma.08G215700	1	0	0	0	1	0	0	1	3	1	0	1	1	1	1	0	0	2	0	1	1	2	0	1	0	0	0	0	1	1	18	9.61658826888349e-05	1	1	0.000271532
5749	Glyma.08G351400	1	0	0	0	2	0	0	0	0	0	0	2	1	0	2	0	0	1	0	1	0	2	2	2	1	0	1	0	1	1	18	9.61658826888349e-05	1	1	0.000271532
5836	Glyma.09G021100	1	0	0	0	0	0	0	1	1	1	0	1	2	0	1	1	0	0	1	1	1	1	1	1	1	0	2	0	1	1	18	9.61658826888349e-05	1	1	0.000271532
6027	Glyma.09G085700	2	0	0	0	1	0	0	1	2	1	0	0	2	1	0	1	0	0	0	1	1	1	1	1	0	0	2	0	1	1	18	9.61658826888349e-05	1	1	0.000271532
6154	Glyma.09G124200	1	0	0	0	1	0	0	3	2	3	0	0	1	0	3	0	0	0	0	0	0	2	1	0	0	0	1	0	1	1	18	9.61658826888349e-05	1	1	0.000271532
6293	Glyma.09G173300	1	0	1	0	1	0	0	1	1	1	0	0	1	0	3	0	0	1	0	2	0	1	1	1	1	0	1	0	1	1	18	9.61658826888349e-05	1	1	0.000271532
6372	Glyma.09G196300	1	0	1	0	1	0	0	1	1	1	0	1	1	1	2	0	0	1	0	1	1	1	1	1	0	0	1	0	1	1	18	9.61658826888349e-05	1	1	0.000271532
6432	Glyma.09G215100	3	0	0	0	0	0	0	2	0	2	0	0	0	0	3	1	0	0	0	1	0	2	1	1	0	0	2	0	1	1	18	9.61658826888349e-05	1	1	0.000271532
6680	Glyma.10G041700	1	0	1	0	1	0	0	1	1	1	0	1	1	1	1	0	0	2	0	1	1	1	1	1	0	0	1	0	1	1	18	9.61658826888349e-05	1	1	0.000271532
6710	Glyma.10G052850	1	0	1	0	0	0	0	1	2	1	0	1	1	0	1	1	0	1	0	1	1	1	1	1	1	0	1	0	1	1	18	9.61658826888349e-05	1	1	0.000271532
7173	Glyma.10G210000	1	0	1	0	1	0	0	1	1	1	0	0	1	1	1	1	0	1	0	1	1	1	1	1	1	0	1	0	1	1	18	9.61658826888349e-05	1	1	0.000271532
7424	Glyma.11G077600	1	0	0	0	1	0	0	1	1	1	1	0	1	1	1	0	0	1	1	1	1	1	1	1	1	0	1	0	1	1	18	9.61658826888349e-05	1	1	0.000271532
7832	Glyma.11G254800	1	0	0	0	1	0	0	1	1	1	0	1	1	1	1	0	0	0	0	2	2	1	2	1	0	0	1	0	1	1	18	9.61658826888349e-05	1	1	0.000271532
8223	Glyma.12G177700	1	0	1	0	1	0	0	1	1	1	0	1	1	1	2	0	0	0	0	1	1	1	1	1	1	0	1	0	1	1	18	9.61658826888349e-05	1	1	0.000271532
8658	Glyma.13G095800	2	0	0	0	1	0	0	1	1	1	0	1	1	1	0	1	0	0	0	1	1	1	1	1	1	0	2	0	1	1	18	9.61658826888349e-05	1	1	0.000271532
8659	Glyma.13G096200	1	0	0	0	1	0	0	1	1	1	1	1	1	1	1	0	0	1	0	1	1	1	1	1	1	0	1	0	1	1	18	9.61658826888349e-05	1	1	0.000271532
9754	Glyma.14G171500	1	0	0	0	1	0	0	1	1	1	0	0	1	1	1	1	0	1	0	2	1	1	1	1	0	0	2	0	1	1	18	9.61658826888349e-05	1	1	0.000271532
9788	Glyma.14G193800	1	0	0	0	1	0	0	1	1	1	0	1	1	1	2	1	0	0	0	1	1	2	1	1	0	0	1	0	1	1	18	9.61658826888349e-05	1	1	0.000271532
10251	Glyma.15G173300	2	0	0	0	0	0	0	0	2	0	0	0	2	0	0	1	0	0	0	2	0	2	2	2	1	0	2	0	1	1	18	9.61658826888349e-05	1	1	0.000271532
11021	Glyma.16G116450	3	0	0	0	2	0	0	0	0	0	0	0	2	3	3	1	0	0	0	0	0	1	0	0	3	0	0	0	1	1	18	9.61658826888349e-05	1	1	0.000271532
11111	Glyma.16G145800	1	0	0	0	1	0	0	1	1	1	0	0	1	1	2	0	0	0	0	2	0	2	2	2	0	0	1	0	1	1	18	9.61658826888349e-05	1	1	0.000271532
11438	Glyma.17G069202	1	0	0	0	1	0	0	1	1	1	0	0	1	1	1	1	0	1	0	2	2	1	1	1	0	0	1	0	1	1	18	9.61658826888349e-05	1	1	0.000271532
12121	Glyma.18G095500	3	0	0	0	1	0	0	1	3	1	0	0	3	0	1	0	0	0	0	1	0	1	1	1	0	0	1	0	1	1	18	9.61658826888349e-05	1	1	0.000271532
12125	Glyma.18G097300	2	1	0	0	1	0	0	2	1	2	0	1	1	1	1	1	0	0	0	0	0	2	1	1	0	0	0	0	1	1	18	9.61658826888349e-05	1	1	0.000271532
13152	Glyma.19G062900	2	0	0	0	0	0	0	1	2	1	0	0	2	0	2	0	0	0	0	0	0	2	2	1	1	0	2	0	1	1	18	9.61658826888349e-05	1	1	0.000271532
13403	Glyma.19G137700	1	0	0	0	2	0	0	2	0	2	0	0	2	2	1	0	0	1	0	0	1	1	1	0	0	0	2	0	1	1	18	9.61658826888349e-05	1	1	0.000271532
13445	Glyma.19G156700	1	0	1	0	1	0	0	1	1	1	0	1	1	1	1	0	0	1	0	1	1	1	1	1	1	0	1	0	1	1	18	9.61658826888349e-05	1	1	0.000271532
13704	Glyma.20G013000	3	0	0	0	1	0	0	1	1	1	0	0	2	1	3	0	0	0	1	1	0	0	0	2	0	0	1	0	1	1	18	9.61658826888349e-05	1	1	0.000271532
13729	Glyma.20G019502	1	0	0	0	2	0	0	1	1	1	0	1	1	1	1	0	0	1	0	1	1	2	1	1	0	0	1	0	1	1	18	9.61658826888349e-05	1	1	0.000271532
13858	Glyma.20G061700	2	0	0	0	1	0	0	1	1	1	0	1	1	1	1	1	0	1	0	1	1	1	1	1	0	0	1	0	1	1	18	9.61658826888349e-05	1	1	0.000271532
14272	Glyma.20G222600	1	0	1	0	1	0	0	1	1	1	0	1	1	1	1	1	0	1	0	1	1	1	1	1	0	0	1	0	1	1	18	9.61658826888349e-05	1	1	0.000271532
14661	Glyma.13G187800	0	0	1	0	0	0	0	3	0	3	0	0	3	2	0	0	0	0	0	1	0	0	0	0	3	0	2	0	1	1	18	9.61658826888349e-05	1	1	0.000271532
15094	Glyma.03G029900	0	0	0	0	2	0	0	2	0	2	0	0	2	0	0	0	0	0	0	0	1	2	3	2	1	0	1	0	1	1	18	9.61658826888349e-05	1	1	0.000271532
15788	Glyma.09G019500	0	0	0	0	1	0	0	1	1	1	0	1	1	1	1	1	0	1	0	1	1	1	1	1	1	1	1	0	1	1	18	9.61658826888349e-05	1	1	0.000271532
16354	Glyma.14G089090	0	0	0	0	3	0	0	3	0	3	0	0	0	0	4	1	0	0	0	0	0	1	0	3	0	0	0	0	1	1	18	9.61658826888349e-05	1	1	0.000271532
16473	Glyma.15G213900	0	0	0	0	2	0	0	0	2	0	0	1	5	2	2	1	0	0	0	0	1	1	1	0	0	0	0	0	1	1	18	9.61658826888349e-05	1	1	0.000271532
16585	Glyma.16G176900	0	0	0	0	2	0	0	0	0	0	0	1	6	1	0	0	0	0	0	1	0	1	3	0	0	0	3	0	1	1	18	9.61658826888349e-05	1	1	0.000271532
18812	Glyma.16G203800	0	0	0	0	0	0	0	3	3	3	0	0	3	0	3	0	0	0	0	0	1	0	0	0	0	0	2	0	1	1	18	9.61658826888349e-05	1	1	0.000271532
18856	Glyma.17G169700	0	0	0	0	0	0	0	3	0	3	0	3	0	0	4	0	0	0	0	1	0	0	3	1	0	0	0	0	1	1	18	9.61658826888349e-05	1	1	0.000271532
108	Glyma.01G037300	1	0	0	0	1	1	1	1	1	1	0	0	1	0	1	0	0	1	0	0	0	2	1	1	0	0	1	0	0	0	15	0.000107511	1	1	0.00028905
144	Glyma.01G054000	1	0	0	0	1	1	1	1	1	1	0	0	1	1	1	0	0	0	0	2	0	1	1	0	0	0	1	0	0	0	15	0.000107511	1	1	0.00028905
164	Glyma.01G064100	1	0	0	0	1	1	1	1	1	1	0	1	1	0	1	0	0	0	0	1	0	1	1	1	0	0	1	0	0	0	15	0.000107511	1	1	0.00028905
227	Glyma.01G080800	1	0	0	0	0	1	1	1	1	1	0	0	2	0	2	0	0	0	0	1	0	1	1	1	0	0	1	0	0	0	15	0.000107511	1	1	0.00028905
236	Glyma.01G083600	3	0	0	0	1	1	1	1	1	1	0	0	2	1	1	0	0	0	0	1	0	1	0	0	0	0	0	0	0	0	15	0.000107511	1	1	0.00028905
237	Glyma.01G084500	1	0	0	0	1	1	1	0	1	0	0	0	1	1	2	0	0	0	0	0	1	2	1	1	0	0	1	0	0	0	15	0.000107511	1	1	0.00028905
238	Glyma.01G084600	1	0	0	0	1	1	1	0	1	0	0	0	1	1	1	0	0	1	0	1	1	1	1	1	1	0	0	0	0	0	15	0.000107511	1	1	0.00028905
250	Glyma.01G088200	1	0	0	0	1	1	1	1	1	1	0	0	1	0	1	0	0	0	0	1	1	1	1	0	1	0	1	0	0	0	15	0.000107511	1	1	0.00028905
308	Glyma.01G099200	1	0	0	0	1	1	1	0	1	0	0	1	0	1	1	0	0	1	0	1	1	1	1	1	1	0	0	0	0	0	15	0.000107511	1	1	0.00028905
377	Glyma.01G114500	1	0	0	0	1	1	1	1	1	1	0	0	0	1	1	0	0	0	0	1	0	1	1	1	1	0	1	0	0	0	15	0.000107511	1	1	0.00028905
498	Glyma.01G141000	1	0	0	0	0	0	1	1	1	1	0	0	2	1	1	0	0	0	0	1	1	1	2	0	0	0	1	0	0	0	15	0.000107511	1	1	0.00028905
519	Glyma.01G148900	3	0	0	0	0	0	3	0	0	0	0	0	0	0	6	0	0	3	0	0	0	0	0	0	0	0	0	0	0	0	15	0.000107511	1	1	0.00028905
530	Glyma.01G152100	3	0	0	0	3	0	0	3	0	3	0	0	0	3	0	0	0	0	0	0	0	0	0	0	0	0	0	0	0	0	15	0.000107511	1	1	0.00028905
584	Glyma.01G177500	1	0	0	0	1	0	1	1	1	1	0	0	1	0	1	0	0	1	0	1	1	1	1	1	0	0	1	0	0	0	15	0.000107511	1	1	0.00028905
619	Glyma.01G196400	1	0	1	0	1	0	1	1	1	1	0	1	1	0	1	0	0	1	1	0	0	1	1	0	0	0	1	0	0	0	15	0.000107511	1	1	0.00028905
620	Glyma.01G198600	1	0	1	0	1	0	1	1	1	1	0	0	1	1	1	0	0	0	0	0	0	2	1	1	0	0	1	0	0	0	15	0.000107511	1	1	0.00028905
673	Glyma.01G216933	3	0	0	0	0	0	0	0	0	0	0	0	0	0	0	0	0	0	0	0	0	3	3	3	3	0	0	0	0	0	15	0.000107511	1	1	0.00028905
680	Glyma.01G218700	2	0	0	0	0	0	1	1	1	1	0	1	0	0	1	0	0	0	0	0	1	2	2	2	0	0	0	0	0	0	15	0.000107511	1	1	0.00028905
681	Glyma.01G219001	2	0	0	0	1	0	1	1	1	1	0	1	1	1	1	0	0	0	0	0	0	1	1	1	0	0	1	0	0	0	15	0.000107511	1	1	0.00028905
701	Glyma.01G225400	1	0	0	0	0	0	1	1	1	1	0	1	0	0	1	0	0	1	0	1	1	1	1	1	1	0	1	0	0	0	15	0.000107511	1	1	0.00028905
772	Glyma.02G013402	1	0	0	0	0	0	1	1	1	1	0	0	1	1	1	0	0	1	0	1	0	1	1	1	1	0	1	0	0	0	15	0.000107511	1	1	0.00028905
795	Glyma.02G020400	5	0	0	0	0	0	0	0	0	0	0	0	0	0	0	0	0	0	0	0	0	5	0	0	0	0	5	0	0	0	15	0.000107511	1	1	0.00028905
808	Glyma.02G026500	1	0	0	0	1	0	1	1	1	1	0	0	1	1	1	0	0	1	0	1	0	1	1	1	0	0	1	0	0	0	15	0.000107511	1	1	0.00028905
887	Glyma.02G059900	6	0	0	0	0	0	6	0	0	0	0	0	0	0	0	0	0	3	0	0	0	0	0	0	0	0	0	0	0	0	15	0.000107511	1	1	0.00028905
893	Glyma.02G061000	2	0	0	0	1	0	2	1	1	1	0	1	1	1	0	0	0	0	0	0	1	1	1	0	0	0	1	0	0	0	15	0.000107511	1	1	0.00028905
938	Glyma.02G074200	3	0	0	0	0	0	3	0	3	0	0	0	0	0	3	0	0	0	0	0	0	3	0	0	0	0	0	0	0	0	15	0.000107511	1	1	0.00028905
963	Glyma.02G081500	1	0	1	0	0	0	1	1	1	1	0	1	1	1	1	1	0	0	0	0	1	1	0	0	1	0	1	0	0	0	15	0.000107511	1	1	0.00028905
989	Glyma.02G090600	5	0	0	0	0	0	0	0	0	0	0	0	0	0	0	0	0	0	0	0	0	0	5	5	0	0	0	0	0	0	15	0.000107511	1	1	0.00028905
1021	Glyma.02G099200	1	0	0	0	0	0	1	2	1	2	0	0	1	1	1	0	0	1	1	1	1	0	0	0	0	0	1	0	0	0	15	0.000107511	1	1	0.00028905
1057	Glyma.02G109166	1	0	0	0	0	0	1	1	1	1	0	0	1	1	1	1	0	1	0	1	1	1	1	0	0	0	1	0	0	0	15	0.000107511	1	1	0.00028905
1060	Glyma.02G109800	2	0	0	0	1	0	1	1	1	1	0	0	1	1	1	0	0	0	0	1	0	1	1	1	0	0	1	0	0	0	15	0.000107511	1	1	0.00028905
1102	Glyma.02G126200	1	0	0	0	1	0	1	1	1	1	0	0	1	1	1	0	0	1	0	0	1	1	1	1	0	0	1	0	0	0	15	0.000107511	1	1	0.00028905
1120	Glyma.02G132500	1	0	0	0	0	0	1	2	2	2	0	0	1	0	2	0	0	0	0	0	0	3	1	0	0	0	0	0	0	0	15	0.000107511	1	1	0.00028905
[truncated: 25,150 more rows]

## Sheet: Methionine
geneId	VTSweet_LG	PI417206_LG	V10_3653_LG	PI417491_LG	MFS_561_SS	V18_2132_SS	Zizuka_SS	S16_15170C_Y	Hutcheson_Y	S15_15809C_Y	V12_4590_HP	S17_17168_HP	V18_2523HO_HP	V18_0621HOA_FA_O	V18_2764HOLA_FA_O	N16_1296_HOLN	PI084639_Met	PI561286_Met	PI543794_Met	PI594409A_Met	V16_0611_HH	V16_0565_HH	PI506730_HH	PI423823_HH	PI243551_LL	PI424364B_LL	PI408233B_LL	PI398256_LL	WM82.df	High_Met	Normal_Met	p_val	Bonferroni	hochberg	BH
[truncated: 26,200 more rows]

[truncated: 3 more sheets: Seed_Weight, Plant Height, Flower Color]
