# Supplementary material for: Long-read sequencing reveals novel structural variation markers for key agronomic and quality traits of food-grade soybean
Source: Front Plant Sci. 2025 Apr 8;16:1557748. doi: 10.3389/fpls.2025.1557748 (PMC12011826; doi:10.3389/fpls.2025.1557748)
Supplement: Supplementary file 6 [file Table5.xlsx]

## Sheet: Sheet1
Table S5 Number of significant genes associating with selected agronomic and seed composition traits by Benjamini-Hochberg statistical test
Trait	Number of Significant genes
Plant Height	9700
Seed Size	16283
Protein Content	16535
Methionine content	14951
Flower color	9313
Oleic acid	10262
