# Supplementary material for: Long-read sequencing reveals novel structural variation markers for key agronomic and quality traits of food-grade soybean
Source: Front Plant Sci. 2025 Apr 8;16:1557748. doi: 10.3389/fpls.2025.1557748 (PMC12011826; doi:10.3389/fpls.2025.1557748)
Supplement: Supplementary file 7 [file Table6.xlsx]

## Sheet: Table S5
Table S6 The sequences of primers used in this study
Primer annotation	Sequence
Gm08g342200_342300 SV detection forward primer	ACGGCTAGCTACATAACACCAGTTA
Gm08g342200_342300 SV detection reverse primer	CCAAACATGCGTAGCTATATGG
Gm08g342200 real-time PCR forward primer	CGGTACATACTATTTGTTGCCAG
Gm08g342200 real-time PCR reverse primer	GCTGATACGATTTATTGCAACGGT
Gm08g342300 real-time PCR forward primer	GGAGTCGCTTTCATCACCCA
Gm08g342300 real-time PCR reverse primer	AAGCGCCTGATTCCCTTACC
Gm07g090400 SV detection forward primer	TATTGCCGACGGCCAAAGCTAT
Gm07g090400 SV detection reverse primer	CTCTGGATTTTGTGTCACTGAAAGGGCG
Gm07g090400 real-time PCR forward primer	GCACTGGTTATGGAAGTGGAA
Gm07g090400 real-time PCR reverse primer	TCCTCCAGGAAGCTTCTCCTTA
Gm04g050200 SV detection forward primer	ACGTGTCATCACAAAAACTAGGGC
Gm04g050200 SV detection reverse primer	GGTAAGTGAATTTATCGTGTTAGGTG
